# Supplementary material for: Population Genomic Sequencing Delineates Global Landscape of Copy Number Variations that Drive Domestication and Breed Formation of in Chicken
Source: Front Genet. 2022 Mar 22;13:830393. doi: 10.3389/fgene.2022.830393 (PMC8980806; doi:10.3389/fgene.2022.830393)
Supplement: Supplementary file 2 [file DataSheet3.xlsx]

## Sheet: Supporting table titles
Table	Title
Additional file Table S1	The detailed samples information and whole genome resequencing information for 51 samples.
Additional file Table S2	The copy number variation results for each method.
Additional file Table S3	Summary statistic of copy number variation regions number and types.
Additional file Table S4	The CNVRs genes enriched terms using Kyoto Encyclopedia of Genes and Genomics (KEGG) and Gene ontology (GO).
Additional file Table S5	The list of high duplication CNVRs and corresponding gene family that are presented in all individuals.
Additional file Table S6	The calculated statistic of Vst and corresponding gene annotation for the comparing between RJF and all the six domestic breeds. Only the windows with 1% toppest values were calculated.
Additional file Table S7	The ingenuity pathway analysis (IPA) enrichment analysis of all chicken domestic associated genes.
Additional file Table S8	The breed specific CNV and corresponding gene annotation. The analyzed of copy number based on Vst according to mrFast with a resolution of 1-kb non-overlapping non-masked windows for each CNVR.
Additional file Table S9	The overlaps between Vst-involved genes and differentially expressed genes in cerebrum.

## Sheet: S1 Table
Sample ID	Samples*	Breeds	Gender	Collected regions	Number of paird-end reads	Read depth	Mrfast
							CNV(Autosome)
							Segmental Duplication				Deletion
							Number	Total length	Mean length	Median length	Number	Total length	Mean length	Median length
1	XH1	Guangdong Xinghua	Male	South China Agricultural University	113860179	10X	341	6712417	19684.5	10000	21	426491	20309.1	12523
2	XH2	Guangdong Xinghua	Male	South China Agricultural University	115148515	10X	288	6440463	22362.7	10411	18	311223	17290.2	11346.5
3	XH3	Guangdong Xinghua	Male	South China Agricultural University	101326356	9X	328	6864768	20929.2	10581	55	928940	16889.8	12101
4	XH4	Guangdong Xinghua	Male	South China Agricultural University	107590714	10X	431	7912132	18357.6	10000	40	679808	16995.2	13078.5
5	XH5	Guangdong Xinghua	Male	South China Agricultural University	110699895	10X	429	7945834	18521.8	10000	88	1426687	16212.4	11219
6	XH6	Guangdong Xinghua	Male	South China Agricultural University	95278067	9X	378	7521075	19897	10000	46	802209	17439.3	12201.5
7	XH7	Guangdong Xinghua	Female	South China Agricultural University	99732500	9X	618	10133135	16396.7	10000	99	1627933	16443.8	11070
8	XH8	Guangdong Xinghua	Female	South China Agricultural University	109739782	10X	394	7740033	19644.8	10000	81	1358422	16770.6	11133
9	LXG1	Luxi Game	Male	Chinese Game Chickens Breeding Farm in JuanCheng, Shandong Province	114381209	10X	336	7245881	21565.1	11031.5	68	1003160	14752.4	11790.5
10	LXG2	Luxi Game	Male	Chinese Game Chickens Breeding Farm in JuanCheng, Shandong Province	111509571	10X	281	6460083	22989.6	11063	41	635257	15494.1	11200
11	LXG3	Luxi Game	Male	Chinese Game Chickens Breeding Farm in JuanCheng, Shandong Province	109429414	10X	299	6808545	22771	11000	36	548006	15222.4	11254.5
12	LXG4	Luxi Game	Male	Chinese Game Chickens Breeding Farm in JuanCheng, Shandong Province	103693239	10X	265	6268399	23654.3	11000	48	669430	13946.5	10523
13	LXG5	Luxi Game	Male	Chinese Game Chickens Breeding Farm in JuanCheng, Shandong Province	107437568	10X	291	6630170	22784.1	11000	40	649674	16241.9	10842
14	LXG7	Luxi Game	Female	Chinese Game Chickens Breeding Farm in JuanCheng, Shandong Province	113371940	10X	318	7073646	22244.2	10531.5	52	694898	13363.4	11165
15	LXG8	Luxi Game	Female	Chinese Game Chickens Breeding Farm in JuanCheng, Shandong Province	96368670	9X	300	6825062	22750.2	11000	37	580914	15700.4	11269
16	LXG9	Luxi Game	Female	Chinese Game Chickens Breeding Farm in JuanCheng, Shandong Province	97249482	9X	330	6956551	21080.5	10000	47	690723	14696.2	10490
17	YOU1	Beijing You	Male	Beijing Academy of Agriculture and Forestry Sciences	104308886	10X	308	6345413	20602	10000	34	462198	13594.1	10216.5
18	YOU2	Beijing You	Male	Beijing Academy of Agriculture and Forestry Sciences	99514029	9X	319	6870015	21536.1	10067	27	544532	20167.8	11076
19	YOU3	Beijing You	Male	Beijing Academy of Agriculture and Forestry Sciences	97783316	9X	282	6118080	21695.3	10411	37	488106	13192	11233
20	YOU4	Beijing You	Male	Beijing Academy of Agriculture and Forestry Sciences	106181536	10X	284	6237944	21964.6	11000	40	696253	17406.3	10566.5
21	YOU5	Beijing You	Male	Beijing Academy of Agriculture and Forestry Sciences	101055204	9X	284	6324569	22269.6	11000	37	657534	17771.2	11792
22	YOU7	Beijing You	Female	Beijing Academy of Agriculture and Forestry Sciences	108733673	10X	310	6802109	21942.3	10215	35	448502	12814.3	10950
23	YOU8	Beijing You	Female	Beijing Academy of Agriculture and Forestry Sciences	106194729	10X	320	6384112	19950.3	9155.5	34	427352	12569.2	10108.5
24	YOU9	Beijing You	Female	Beijing Academy of Agriculture and Forestry Sciences	98972684	9X	294	6738520	22920.1	10389	30	437395	14579.8	11274.5
25	SILK1	Silkie	Male	Jiangxi Province (sampled from South China Agricultural University )	108933663	10X	306	6841848	22359	10268.5	51	965776	18936.8	13060
26	SILK2	Silkie	Male	Jiangxi Province (sampled from South China Agricultural University )	109086391	10X	422	7718162	18289.5	9520.5	26	487275	18741.3	13800.5
27	SILK3	Silkie	Male	Jiangxi Province (sampled from South China Agricultural University )	109773389	10X	300	6610986	22036.6	10000	37	597085	16137.4	12436
28	SILK4	Silkie	Male	Jiangxi Province (sampled from South China Agricultural University )	102397372	9X	309	6649562	21519.6	10000	31	429719	13861.9	10251
29	SILK5	Silkie	Male	Jiangxi Province (sampled from South China Agricultural University )	111966457	10X	290	6735234	23224.9	10253.5	30	515650	17188.3	12134
30	SILK8	Silkie	Male	Jiangxi Province (sampled from South China Agricultural University )	99378251	9X	298	7023323	23568.2	10098.5	38	579476	15249.4	11188
31	SILK9	Silkie	Female	Jiangxi Province (sampled from South China Agricultural University )	107940303	10X	375	7458088	19888.2	10000	20	242970	12148.5	12025
32	SILK10	Silkie	Female	Jiangxi Province (sampled from South China Agricultural University )	110609674	10X	557	9442076	16951.7	10000	30	484977	16165.9	12053.5
33	SILK11	Silkie	Female	Jiangxi Province (sampled from South China Agricultural University )	101094433	9X	404	7539337	18661.7	10000	21	269881	12851.5	10044
34	RW1	Recessive White Rock	Male	South China Agricultural University	117594823	11X	681	10696512	15707.1	10000	76	1318165	17344.3	11514
35	RW2	Recessive White Rock	Male	South China Agricultural University	110476081	10X	484	8526071	17615.8	10000	74	1313483	17749.8	11119.5
36	RW3	Recessive White Rock	Male	South China Agricultural University	107370319	10X	444	8004016	18027.1	10000	85	1440065	16941.9	11070
37	RW4	Recessive White Rock	Male	South China Agricultural University	107300605	10X	813	12432587	15292.2	10000	108	1758903	16286.1	11114
38	RW7	Recessive White Rock	Female	South China Agricultural University	99378251	9X	596	9628451	16155.1	10000	64	1000649	15635.1	13031.5
39	RW8	Recessive White Rock	Female	South China Agricultural University	107940303	10X	466	8247430	17698.3	10000	81	1288313	15905.1	11000
40	RW9	Recessive White Rock	Female	South China Agricultural University	110609674	10X	601	9544244	15880.6	10000	39	539531	13834.1	11929
41	RW10	Recessive White Rock	Female	South China Agricultural University	101094433	9X	814	12193452	14979.7	10000	24	360636	15026.5	12000
42	WL1	White Leghorn	Male	South China Agricultural University	112470790	10X	278	6219861	22373.6	11000	38	537031	14132.4	10115
43	WL2	White Leghorn	Female	South China Agricultural University	110225670	10X	304	6725624	22123.8	10714.5	39	574688	14735.6	9372
44	WL3	White Leghorn	Male	South China Agricultural University	113284157	10X	271	6258062	23092.5	11000	39	585710	15018.2	11269
45	WL4	White Leghorn	Male	South China Agricultural University	99355992	9X	273	6247572	22884.9	10660	37	673214	18195	11269
46	WL7	White Leghorn	Female	South China Agricultural University	100051812	9X	277	6225124	22473.4	11000	31	440402	14206.5	10977
47	WL8	White Leghorn	Female	South China Agricultural University	98369969	9X	293	6396072	21829.6	10066	57	921491	16166.5	11269
48	RJF3	Red Jungle Fowl	Female	Yunnan Province (download from NCBI with BioProject Number PRJna241474)	140064867	12X	338	7315124	21642.4	10596.5	61	815394	13367.1	9525
49	RJF5	Red Jungle Fowl	Female	Yunnan Province (download from NCBI with BioProject Number PRJna241474)	112659236	9X	451	8616701	19105.8	10067	210	3360395	16001.9	11542.5
50	RJF6	Red Jungle Fowl	Male	Hainan Province (download from NCBI with BioProject Number PRJna241474)	122299254	11X	348	7447501	21400.9	10170	170	2509110	14759.5	11086
51	RJF7	Red Jungle Fowl	Male	Yunnan Province (download from NCBI with BioProject Number PRJna241474)	108211439	9X	328	7092322	21622.9	10622	136	1873081	13772.6	10236
*XH: Guangdong Xinghua chicken; LXDG: Luxi Game chicken; YOU: Beijing You chicken; SILK: Silkie; RW: Recessive White Rock; WL: White Leghorn; RJF: Red Jungle Fowl
#CNV: Copy number variation; CNVR: Copy number variation region

## Sheet: S2 Table 
Sample ID	Samples	ID2	mrFAST Duplication						mrFAST Deletion						CNVnator Deletion						BreakDancer Deletion						Pindel Deletion						Deletion of two methods support
			Number	Total Length	Min Length	Max Length	Mean Length	Median Length	Number	Total Length	Min Length	Max Length	Mean Length	Median Length	Number	Total Length	Min Length	Max Length	Mean Length	Median Length	Number	Total Length	Min Length	Max Length	Mean Length	Median Length	Number	Total Length	Min Length	Max Length	Mean Length	Median Length	Number	Total Length	Min Length	Max Length	Mean Length	Median Length	Total Deletion	Two methods support	four methods support	Ratio1	Ratio2
1	XH1	X-m1	341	6712758	2000	397285	19685.5	10000	21	426512	7079	79037	20310.1	12524	661	8209000	1500	131500	12419.1	5000	2157	4471608	51	858384	2073.07	308	2211	2337897	50	32316	1057.39	108	1842	6250201	51	858384	3393.16	352	5049	1842	8	0.364825	0.00158447
2	XH2	X-m2	288	6440751	2000	366285	22363.7	10411	18	311241	5645	69183	17291.2	11347.5	648	7939000	1500	131500	12251.5	4000	2011	3228171	52	626271	1605.26	311	2473	2529363	50	32273	1022.79	104	1853	4918202	53	626271	2654.18	403	5150	1853	4	0.359806	0.000776699
3	XH3	X-m3	328	6865096	2000	435285	20930.2	10581	55	928995	6392	69183	16890.8	12102	705	8933500	1500	136500	12671.6	5000	2402	2665992	50	487652	1109.91	291	1973	2666734	50	32232	1351.61	124	1776	4622823	50	487652	2602.94	337	5135	1776	16	0.345862	0.00311587
4	XH4	X-m4	431	7912563	2000	397285	18358.6	10000	40	679848	6102	69183	16996.2	13079.5	748	9160500	1000	250500	12246.7	4500	2615	4405149	50	784393	1684.57	297	2090	2682257	50	32232	1283.38	119	1923	6609956	51	784393	3437.31	353	5493	1923	4	0.350082	0.0007282
5	XH5	X-m5	429	7946263	2000	430285	18522.8	10000	88	1426775	6038	87094	16213.4	11220	744	8547500	1500	136000	11488.6	4000	2442	5890995	50	784355	2412.36	300.5	2268	3273061	50	32221	1443.15	117	1990	8826419	50	784355	4435.39	363	5541	1990	0	0.359141	0
6	XH6	X-m6	378	7521453	2000	433285	19898	10000	46	802255	6486	69183	17440.3	12202.5	677	8234000	1500	142500	12162.5	4500	2237	3420657	68	626299	1529.13	324	1691	2477561	50	31359	1465.15	134	1475	4850747	56	626299	3288.64	388	4650	1475	0	0.317204	0
7	XH7	X-f1	618	10133753	2000	428285	16397.7	10000	99	1628032	5113	98147	16444.8	11071	652	8804000	1500	153500	13503.1	5000	2329	3861177	50	626983	1657.87	304	2046	3076784	50	32232	1503.8	124	1776	6796781	50	626983	3827.02	373.5	5125	1776	10	0.346537	0.00195122
8	XH8	X-f2	394	7740427	2000	433285	19645.8	10000	81	1358503	6001	83226	16771.6	11134	676	8774500	1500	150000	12980	5500	2267	2768242	54	487676	1221.1	316	2323	3569996	50	32221	1536.8	124	1924	6048446	51	487676	3143.68	362	5345	1924	8	0.359963	0.00149673
9	LXG1	D-m1	336	7246217	2000	437285	21566.1	11031.5	68	1003228	6308	69183	14753.4	11791.5	933	8008500	1000	131500	8583.6	3000	2477	5795940	55	2225885	2339.9	308	2178	3305397	50	32232	1517.63	130	2047	8330856	51	2225885	4069.79	394	5655	2047	24	0.361981	0.00424403
10	LXG2	D-m2	281	6460364	2000	428285	22990.6	11063	41	635298	6001	69183	15495.1	11201	770	8636500	1500	131500	11216.2	4000	2420	4544990	61	858365	1878.1	318	2030	2500023	50	32232	1231.54	123	1812	6072356	61	858365	3351.19	382	5260	1812	8	0.344487	0.00152091
11	LXG3	D-m3	299	6808844	2000	430285	22772.1	11000	36	548042	6143	69183	15223.4	11255.5	785	7903000	1000	131500	10067.5	3500	2372	3186834	51	626299	1343.52	303	2047	2524179	50	32221	1233.11	121	1875	4368281	52	626299	2329.75	393	5238	1875	14	0.357961	0.00267278
12	LXG4	D-m4	265	6268664	2000	433285	23655.3	11000	48	669478	6001	69183	13947.5	10524	669	7571000	1500	131500	11316.9	4000	2141	3383877	52	626320	1580.51	326	1816	2041072	50	32232	1123.94	120	1620	4356432	51	626320	2689.16	388.5	4674	1620	9	0.346598	0.00192555
13	LXG5	D-m5	291	6630461	2000	428285	22785.1	11000	40	649714	6353	117001	16242.9	10843	732	7925500	1500	131500	10827.2	4000	2101	4946656	52	858426	2354.43	320	2040	2460112	50	32221	1205.94	124	1748	6515212	52	858426	3727.24	389	4913	1748	4	0.355791	0.000814166
14	LXG7	D-f1	318	7073964	2000	428285	22245.2	10531.5	52	694950	7060	69183	13364.4	11166	865	8097500	1000	161500	9361.27	3000	2443	5777267	50	852860	2364.82	307	2517	3038439	50	32232	1207.17	113	2157	7735050	50	852860	3586.02	355	5876	2157	20	0.367086	0.00340368
15	LXG8	D-f2	300	6825362	2000	428285	22751.2	11000	37	580951	6038	65183	15701.4	11270	749	8030000	1500	153000	10721	4000	2222	5397101	62	858328	2428.94	329.5	1839	2427435	50	32291	1319.98	123	1645	7474562	55	858328	4543.81	414	4846	1645	6	0.339455	0.00123813
16	LXG9	D-f3	330	6956881	2000	430285	21081.5	10000	47	690770	7105	73103	14697.2	10491	676	7886500	1000	153000	11666.4	4000	2194	3397410	50	626300	1548.5	301	2015	2449225	50	32163	1215.5	120	1733	4799301	50	626300	2769.36	350	4932	1733	16	0.351379	0.00324412
17	YOU1	Y1-m1	308	6345721	2000	428285	20603	10000	34	462232	6046	69183	13595.1	10217.5	623	7572500	1500	172000	12154.9	4500	2102	4653210	54	784366	2213.71	343	1633	1697672	50	32232	1039.6	124	1396	5110591	52	784366	3660.88	388.5	4391	1396	12	0.317923	0.00273286
18	YOU2	Y1-m2	319	6870334	2000	433285	21537.1	10067	27	544559	7881	106700	20168.9	11077	604	7366500	1500	183000	12196.2	4500	1972	3416515	50	626238	1732.51	334	1728	2565012	50	32232	1484.38	134	1471	4874168	50	626238	3313.51	407	4331	1471	12	0.339644	0.00277072
19	YOU3	Y1-m3	282	6118362	2000	433285	21696.3	10411	37	488143	6112	69183	13193.1	11234	630	7808000	1500	131500	12393.7	4000	1967	3699406	52	626223	1880.74	319	1928	2257624	50	32221	1170.97	117	1622	4762098	52	626223	2935.94	396	4562	1622	20	0.355546	0.00438404
20	YOU4	Y1-m4	284	6238228	2000	361285	21965.6	11000	40	696293	6147	130183	17407.3	10567.5	678	7637500	1500	132000	11264.7	4000	1938	2966093	50	626283	1530.49	315	2237	2230757	50	32163	997.209	111	1781	4354125	50	626283	2444.76	374	4891	1781	24	0.364138	0.00490697
21	YOU5	Y1-m5	284	6324853	2000	397285	22270.6	11000	37	657571	6035	130183	17772.2	11793	646	7645000	1500	131500	11834.4	4000	1814	3220342	50	626467	1775.27	320	1892	2171680	50	31920	1147.82	120	1526	4863920	50	626467	3187.37	376	4389	1526	34	0.347687	0.00774664
22	YOU7	Y1-f1	310	6802419	2000	428285	21943.3	10215	35	448537	4052	67183	12815.3	10951	712	7759500	1500	153500	10898.2	3500	2107	4014598	51	626350	1905.36	313	2219	2396686	50	32163	1080.07	118	1868	5335605	51	626350	2856.32	359	5072	1868	24	0.368297	0.00473186
23	YOU8	Y1-f2	320	6384432	2000	397285	19951.3	9155.5	34	427386	5001	57028	12570.2	10109.5	654	7609000	1500	145000	11634.6	4000	2212	4123708	50	672067	1864.24	303.5	1997	2143017	50	32232	1073.12	119	1793	5313715	50	672067	2963.59	353	4897	1793	16	0.366143	0.00326731
24	YOU9	Y1-f3	294	6738814	2000	430285	22921.1	10389	30	437425	7448	69183	14580.8	11275.5	713	7941500	1500	221500	11138.1	4000	2103	3381927	50	626314	1608.14	306	2020	2357130	50	32232	1166.9	118.5	1748	4575135	50	626314	2617.35	384	4866	1748	17	0.359227	0.00349363
25	SILK1	S-m1	306	6842154	2000	430285	22360	10268.5	51	965827	7045	121279	18937.8	13061	922	8817000	1000	222000	9562.91	3000	2498	3942352	52	626222	1578.2	283.5	2209	2751451	50	32216	1245.56	120	2082	6244546	51	626222	2999.3	350	5680	2082	15	0.366549	0.00264085
26	SILK2	S-m2	422	7718584	2000	428285	18290.5	9520.5	26	487301	6001	69183	18742.3	13801.5	872	8199500	1000	131500	9403.1	3000	2390	3510537	53	626350	1468.84	300	1914	2090212	50	32216	1092.06	111	1811	5068712	51	626350	2798.85	350	5201	1811	13	0.348202	0.00249952
27	SILK3	S-m3	300	6611286	2000	428285	22037.6	10000	37	597122	7001	69183	16138.4	12437	963	8336000	1000	181000	8656.28	2500	2279	3545980	50	626261	1555.94	290	2258	2122251	50	31266	939.881	103	2004	5364556	50	626261	2676.92	369	5537	2004	34	0.361929	0.00614051
28	SILK4	S-m4	309	6649871	2000	397285	21520.6	10000	31	429750	6038	69183	13862.9	10252	862	8135000	1000	155500	9437.35	3000	2196	3787650	50	626305	1724.8	309.5	1748	1753349	50	26300	1003.06	120.5	1625	4848200	50	626305	2983.51	375	4837	1625	8	0.335952	0.00165392
29	SILK5	S-m5	290	6735524	2000	397285	23225.9	10253.5	30	515680	7001	69183	17189.3	12135	906	8503500	1000	180500	9385.76	3000	2402	3935895	57	626317	1638.59	316	1933	2007395	50	30932	1038.49	117	1804	5481394	51	626317	3038.47	355	5271	1804	20	0.34225	0.00379435
30	SILK8	S-f1	298	7023621	2000	428285	23569.2	10098.5	38	579514	6149	69183	15250.4	11189	729	8473500	1500	213500	11623.5	4000	2141	3188937	52	626252	1489.46	297	1794	2074322	50	31370	1156.26	130.5	1696	4739760	52	626252	2794.67	359	4702	1696	12	0.360698	0.00255211
31	SILK9	S-f2	375	7458463	2000	428285	19889.2	10000	20	242990	7209	20186	12149.5	12026	613	7474500	1500	153000	12193.3	4500	2113	7913421	51	2748792	3745.11	324	1365	1544703	50	31990	1131.65	126	1245	8773531	51	2748792	7047.01	420	4109	1245	8	0.302993	0.00194695
32	SILK10	S-f3	557	9442633	2000	428285	16952.7	10000	30	485007	8001	47029	16166.9	12054.5	711	8305500	1500	153000	11681.4	4500	2262	4015398	50	626302	1775.15	301	2121	2595859	50	32273	1223.88	113	1845	6056970	50	626302	3282.91	367	5124	1845	4	0.36007	0.00078064
33	SILK11	S-f4	404	7539741	2000	433285	18662.7	10000	21	269902	7209	29040	12852.5	10045	634	7421500	1500	153500	11705.8	4000	1732	3243210	50	626431	1872.52	341.5	1729	2183742	50	32163	1263.01	119	1314	4518425	50	626431	3438.68	414.5	4116	1314	8	0.319242	0.00194363
34	RW1	R-m1	681	10697193	2000	428285	15708.1	10000	76	1318241	6134	72088	17345.3	11515	679	8480000	1500	250000	12489	5000	2314	4509016	51	784344	1948.58	293	2526	3966320	50	31934	1570.2	108	2065	7810449	51	784344	3782.3	360	5594	2065	4	0.369146	0.000715052
35	RW2	R-m2	484	8526555	2000	428285	17616.8	10000	74	1313557	5230	88088	17750.8	11120.5	673	8819000	1500	136500	13104	5000	2327	5678536	56	858398	2440.28	311	2251	3170875	50	31327	1408.65	115	2283	6778074	50	672047	2968.93	329	5865	2283	12	0.389258	0.00204604
36	RW3	R-m3	444	8004460	2000	428285	18028.1	10000	85	1440150	6001	69238	16942.9	11071	646	8400000	1500	222000	13003.1	5250	2012	5477535	50	946448	2722.43	318	2303	3428786	50	32221	1488.83	117	1981	8592569	56	858398	4337.49	379	5325	1981	1	0.372019	0.000187793
37	RW4	R-m4	813	12433400	2000	397285	15293.2	10000	108	1759011	5148	70147	16287.1	11115	642	9227500	1500	161500	14373.1	5750	2392	5038616	68	672079	2106.44	298.5	2277	3582733	50	31988	1573.44	110	1862	9160352	51	946448	4919.63	402	5046	1862	5	0.369005	0.000990884
38	RW7	R-f1	596	9629047	2000	430285	16156.1	10000	64	1000713	5134	56594	15636.1	13032.5	641	8645000	1500	198000	13486.7	5000	2358	5202670	57	784339	2206.39	296	2385	3370031	50	32163	1413.01	118	1968	9324092	51	672079	4737.85	356.5	5418	1968	4	0.363234	0.00073828
39	RW8	R-f2	466	8247896	2000	428285	17699.3	10000	81	1288394	6205	71088	15906.1	11001	707	8928500	1500	250000	12628.7	4500	1933	5613953	53	946437	2904.27	337	2396	3076754	50	32053	1284.12	106	2058	7886920	54	784339	3832.32	357	5447	2058	4	0.377823	0.000734349
40	RW9	R-f3	601	9544845	2000	429285	15881.6	10000	39	539570	6075	43594	13835.1	11930	870	9062500	1000	248500	10416.7	3500	2283	5912060	50	858465	2589.6	289	2546	2959532	50	32221	1162.42	107	1837	9105073	52	946437	4956.49	408	5117	1837	8	0.358999	0.00156342
41	RW10	R-f4	814	12194266	2000	397285	14980.7	10000	24	360660	5554	45632	15027.5	12001	743	9196000	1500	250000	12376.9	4000	2493	4103184	50	672047	1645.88	271	2605	2691299	50	32216	1033.13	100	2147	8113275	51	858465	3778.89	356	5736	2147	12	0.374303	0.00209205
42	WL1	L-m1	278	6220139	2000	397285	22374.6	11000	38	537069	4610	69183	14133.4	10116	834	8266000	1000	146000	9911.27	3500	1945	3270102	50	625993	1681.29	284	2350	2612009	50	32216	1111.49	102	1955	5335651	50	625993	2729.23	359	5167	1955	12	0.378363	0.00232243
43	WL2	L-m2	304	6725928	2000	433285	22124.8	10714.5	39	574727	5001	69183	14736.6	9373	777	7848000	1000	153500	10100.4	3000	1873	3161927	50	626269	1688.16	301	2422	2810138	50	32221	1160.26	102	1856	5305404	50	626269	2858.52	363.5	5110	1856	17	0.363209	0.00332681
44	WL3	L-m3	271	6258333	2000	373285	23093.5	11000	39	585749	6124	130183	15019.2	11270	717	7843000	1500	248500	10938.6	3500	1793	4965246	52	858384	2769.24	313	2461	2693824	50	32232	1094.61	99	1872	7288604	52	858384	3893.49	394.5	5010	1872	17	0.373653	0.00339321
45	WL4	L-m4	273	6247845	2000	397285	22885.9	10660	37	673251	7001	110068	18196	11270	697	8419000	1500	131500	12078.9	4000	1780	3068492	50	626161	1723.87	295	1999	2093007	50	32060	1047.03	109	1674	4868304	50	626161	2908.19	356.5	4512	1674	32	0.371011	0.0070922
46	WL7	L-f1	277	6225401	2000	428285	22474.4	11000	31	440433	7038	54028	14207.5	10978	678	8451500	1500	184500	12465.3	4000	1899	4215520	50	858386	2219.86	291	2005	2071580	50	32163	1033.21	102	1664	6238240	50	858386	3748.94	364.5	4612	1664	16	0.360798	0.00346921
47	WL8	L-f2	293	6396365	2000	397285	21830.6	10066	57	921548	6038	112152	16167.5	11270	689	9166000	1500	153000	13303.3	4000	1685	4059021	52	784344	2408.91	323	2169	2188920	50	31922	1009.18	105	1698	6379242	51	784344	3756.92	383.5	4600	1698	24	0.36913	0.00521739
48	RJF3	RJF3	338	7315462	2000	433285	21643.4	10596.5	61	815455	6308	69398	13368.1	9526	1272	8322000	1000	154000	6542.45	2000	4381	8850889	168	965399	2020.29	699	3131	8818951	50	97766	2816.66	102	3185	13942398	51	965399	4377.52	675	8842	3185	32	0.360213	0.00361909
49	RJF5	RJF5	451	8617152	2000	435285	19106.8	10067	210	3360605	6045	244015	16002.9	11543.5	1632	11369000	1000	131500	6966.3	3000	2558	9318048	260	946064	3642.71	1022.5	2464	3317488	50	32117	1346.38	103	2152	13472806	51	946064	6260.6	1000	6864	2152	23	0.31352	0.00335082
50	RJF6	RJF6	348	7447849	2000	430285	21401.9	10170	170	2509280	4001	71088	14760.5	11087	1904	11507000	1000	131500	6043.59	2500	3161	7587829	264	1003356	2400.45	963	4123	5391326	50	32362	1307.62	92	3384	12572791	51	1003356	3715.36	876	9354	3384	18	0.36177	0.00192431
51	RJF7	RJF7	328	7092650	2000	436285	21623.9	10622	136	1873217	6046	69183	13773.7	10237	1559	10093000	1000	131500	6474.02	2500	4170	8556774	213	672036	2051.98	953	7503	11079593	50	32232	1476.69	73	5268	14600981	51	672036	2771.64	682.5	13347	5268	18	0.394695	0.00134862
Average			379.392	7.47478e+06	2000	419677	20489.6	10311.6	53.8039	844735	6155.57	78483.6	15691.6	11311.9	794.549	8.42567e+06	1333.33	165735	11124.5	3941.18	2282.65	4.55472e+06	66.1569	789751	1993.37	355.647	2278.39	2.93383e+06	50	33263.6	1260.98	114.108	1936	6.77718e+06	51.3333	789751	3514.18	407.775	5408.31	1936	13.549	0.356172	0.00256539

## Sheet: S3 Table 
Sample	Method	Platform	CNVR	Length/Mb	Genome percentage	range/bp	Mean/bp	Median/bp	Type proportion
									Del	Dup	Both
6 samples from two lines(ADOL)	Cnvnator、Pindel	Illumina HiSeq 2000	5680	29.41	0.0276	102-543600	5096	1699	0.904	0.076	0.02
475 derived from two chicken lines	PennCNV、CNVPartition	chicken 60 k SNP chip BeadStudio	lean 271	40.26	0.0392	6230-932140	148770	107810	0.65	0.25	0.1
			fat 188	30.6	0.0298	330-1442990	163430	99810	0.76	0.13	0.11
12 samples	Cnvnator	Illumina HiSeq 2000	8840	98.2	0.094	1100-268800	11100	6600	0.427	0.539	0.034
256 samples of Mexican chicken	PennCNV	Axiom® Genome-Wide Chicken Genotyping Array	1216	47.05	0.0438702	93-1345292	38694	13898	0.788651	0.185855	0.0254934
51 samples of 7 chicken breeds	Cnvnator、Pindel、BreakDancer、Mrfast	Illumina HiSeq 2000	11123	75.06	0.0699915	68-2802702	6748	986	0.7942	0.1718	0.034

## Sheet: S4 Table 
GO enrichment
Category	Term	Count	%	PValue	Genes	List Total	Pop Hits	Pop Total	Fold Enrichment	Bonferroni	Benjamini	FDR
GOTERM_BP_DIRECT	GO:0007411~axon guidance	29	1.19588	8.47476e-06	ENSGALG00000001079, ENSGALG00000012329, ENSGALG00000005396, ENSGALG00000012123, ENSGALG00000008974, ENSGALG00000028136, ENSGALG00000006802, ENSGALG00000013568, ENSGALG00000006726, ENSGALG00000011581, ENSGALG00000001772, ENSGALG00000001774, ENSGALG00000008263, ENSGALG00000009523, ENSGALG00000013085, ENSGALG00000011630, ENSGALG00000023430, ENSGALG00000027720, ENSGALG00000011680, ENSGALG00000014014,…	1642	68	8994	2.33598	0.0317568	0.0317568	0.0156643
GOTERM_MF_DIRECT	GO:0005524~ATP binding	216	8.90722	3.54438e-05	ENSGALG00000005374, ENSGALG00000006324, ENSGALG00000011031, ENSGALG00000006037, ENSGALG00000013789, ENSGALG00000007396, ENSGALG00000006426, ENSGALG00000009403, ENSGALG00000028134, ENSGALG00000006829, ENSGALG00000016781, ENSGALG00000012805, ENSGALG00000013268, ENSGALG00000010313, ENSGALG00000010311, ENSGALG00000003220, ENSGALG00000010185, ENSGALG00000011531, ENSGALG00000014749, ENSGALG00000000490,…	1545	935	8532	1.27575	0.0381363	0.0381363	0.0566458
GOTERM_MF_DIRECT	GO:0005096~GTPase activator activity	44	1.81443	7.1486e-05	ENSGALG00000010772, ENSGALG00000005646, ENSGALG00000001225, ENSGALG00000009855, ENSGALG00000008169, ENSGALG00000003322, ENSGALG00000009781, ENSGALG00000003052, ENSGALG00000008410, ENSGALG00000010564, ENSGALG00000010190, ENSGALG00000027391, ENSGALG00000017150, ENSGALG00000005737, ENSGALG00000003717, ENSGALG00000006706, ENSGALG00000011966, ENSGALG00000010031, ENSGALG00000005660, ENSGALG00000014343,…	1545	135	8532	1.79987	0.0754267	0.0384526	0.114217
GOTERM_MF_DIRECT	GO:0035091~phosphatidylinositol binding	24	0.989691	0.000127549	ENSGALG00000006370, ENSGALG00000014071, ENSGALG00000008340, ENSGALG00000015304, ENSGALG00000009426, ENSGALG00000009796, ENSGALG00000016477, ENSGALG00000004029, ENSGALG00000006121, ENSGALG00000002924, ENSGALG00000012052, ENSGALG00000009096, ENSGALG00000008294, ENSGALG00000012814, ENSGALG00000013710, ENSGALG00000005716, ENSGALG00000004150, ENSGALG00000016834, ENSGALG00000005986, ENSGALG00000008691,…	1545	59	8532	2.24637	0.130581	0.0455724	0.203707
GOTERM_BP_DIRECT	GO:0007030~Golgi organization	21	0.865979	0.000478034	ENSGALG00000002719, ENSGALG00000013505, ENSGALG00000005295, ENSGALG00000015635, ENSGALG00000007721, ENSGALG00000010318, ENSGALG00000010385, ENSGALG00000011114, ENSGALG00000008515, ENSGALG00000001084, ENSGALG00000005160, ENSGALG00000007161, ENSGALG00000015450, ENSGALG00000017180, ENSGALG00000015415, ENSGALG00000009900, ENSGALG00000006706, ENSGALG00000015553, ENSGALG00000006156, ENSGALG00000003439,…	1642	52	8994	2.21205	0.838102	0.597634	0.879955
GOTERM_BP_DIRECT	GO:0050885~neuromuscular process controlling balance	14	0.57732	0.000576058	ENSGALG00000003381, ENSGALG00000002859, ENSGALG00000009107, ENSGALG00000001482, ENSGALG00000000610, ENSGALG00000004829, ENSGALG00000007366, ENSGALG00000013568, ENSGALG00000011699, ENSGALG00000015770, ENSGALG00000003123, ENSGALG00000004364, ENSGALG00000016707, ENSGALG00000005834	1642	28	8994	2.73873	0.888559	0.518775	1.05949
GOTERM_BP_DIRECT	GO:0006886~intracellular protein transport	41	1.69072	0.000678226	ENSGALG00000008432, ENSGALG00000001225, ENSGALG00000006799, ENSGALG00000009855, ENSGALG00000003322, ENSGALG00000002536, ENSGALG00000008144, ENSGALG00000005139, ENSGALG00000010190, ENSGALG00000010564, ENSGALG00000005737, ENSGALG00000005869, ENSGALG00000004902, ENSGALG00000006706, ENSGALG00000000848, ENSGALG00000010150, ENSGALG00000027854, ENSGALG00000006156, ENSGALG00000027575, ENSGALG00000004375,…	1642	134	8994	1.67594	0.924495	0.475804	1.24629
GOTERM_BP_DIRECT	GO:0007519~skeletal muscle tissue development	12	0.494845	0.00112676	ENSGALG00000005678, ENSGALG00000015410, ENSGALG00000003782, ENSGALG00000009270, ENSGALG00000007000, ENSGALG00000009424, ENSGALG00000011992, ENSGALG00000027513, ENSGALG00000009612, ENSGALG00000009564, ENSGALG00000005660, ENSGALG00000012207	1642	23	8994	2.85781	0.986338	0.576255	2.06241
GOTERM_MF_DIRECT	GO:0017137~Rab GTPase binding	16	0.659794	0.00116644	ENSGALG00000001225, ENSGALG00000009855, ENSGALG00000004671, ENSGALG00000016776, ENSGALG00000003322, ENSGALG00000009304, ENSGALG00000010190, ENSGALG00000010564, ENSGALG00000005856, ENSGALG00000004578, ENSGALG00000015415, ENSGALG00000012336, ENSGALG00000005737, ENSGALG00000006706, ENSGALG00000027854, ENSGALG00000000540	1545	37	8532	2.38803	0.722055	0.273911	1.84847
GOTERM_BP_DIRECT	GO:0045944~positive regulation of transcription from RNA polymerase II promoter	96	3.95876	0.00186617	ENSGALG00000016680, ENSGALG00000007082, ENSGALG00000005909, ENSGALG00000012329, ENSGALG00000006138, ENSGALG00000023440, ENSGALG00000004044, ENSGALG00000004816, ENSGALG00000019842, ENSGALG00000014836, ENSGALG00000016456, ENSGALG00000011562, ENSGALG00000010325, ENSGALG00000000751, ENSGALG00000005230, ENSGALG00000000840, ENSGALG00000006726, ENSGALG00000011657, ENSGALG00000012363, ENSGALG00000003136,…	1642	395	8994	1.33123	0.999186	0.694408	3.39389
GOTERM_BP_DIRECT	GO:0007507~heart development	31	1.27835	0.00197148	ENSGALG00000016662, ENSGALG00000012329, ENSGALG00000005909, ENSGALG00000004960, ENSGALG00000001847, ENSGALG00000003634, ENSGALG00000016473, ENSGALG00000006726, ENSGALG00000009318, ENSGALG00000015259, ENSGALG00000002632, ENSGALG00000006038, ENSGALG00000006793, ENSGALG00000005660, ENSGALG00000011630, ENSGALG00000014876, ENSGALG00000005352, ENSGALG00000016078, ENSGALG00000006390, ENSGALG00000009612,…	1642	98	8994	1.73267	0.999455	0.658206	3.58213
GOTERM_MF_DIRECT	GO:0003777~microtubule motor activity	16	0.659794	0.00218411	ENSGALG00000005517, ENSGALG00000008725, ENSGALG00000013208, ENSGALG00000002175, ENSGALG00000005241, ENSGALG00000016639, ENSGALG00000007841, ENSGALG00000012689, ENSGALG00000017180, ENSGALG00000006790, ENSGALG00000008605, ENSGALG00000011330, ENSGALG00000008095, ENSGALG00000001111, ENSGALG00000013268, ENSGALG00000004297	1545	39	8532	2.26557	0.909154	0.381042	3.43498
GOTERM_MF_DIRECT	GO:0004016~adenylate cyclase activity	6	0.247423	0.00292887	ENSGALG00000012433, ENSGALG00000007779, ENSGALG00000011699, ENSGALG00000016298, ENSGALG00000013060, ENSGALG00000003837	1545	7	8532	4.73343	0.959953	0.415081	4.58076
GOTERM_BP_DIRECT	GO:0031338~regulation of vesicle fusion	11	0.453608	0.00303468	ENSGALG00000010564, ENSGALG00000010190, ENSGALG00000001225, ENSGALG00000005856, ENSGALG00000004578, ENSGALG00000009855, ENSGALG00000005737, ENSGALG00000016776, ENSGALG00000003322, ENSGALG00000006706, ENSGALG00000027854	1642	22	8994	2.73873	0.999991	0.764655	5.46319
GOTERM_BP_DIRECT	GO:0001933~negative regulation of protein phosphorylation	13	0.536082	0.00314005	ENSGALG00000015910, ENSGALG00000008569, ENSGALG00000004812, ENSGALG00000012123, ENSGALG00000016083, ENSGALG00000008701, ENSGALG00000003634, ENSGALG00000011562, ENSGALG00000006259, ENSGALG00000007161, ENSGALG00000014419, ENSGALG00000019751, ENSGALG00000006793	1642	29	8994	2.45542	0.999994	0.735702	5.64771
GOTERM_BP_DIRECT	GO:0030705~cytoskeleton-dependent intracellular transport	7	0.28866	0.00391995	ENSGALG00000012689, ENSGALG00000007215, ENSGALG00000011581, ENSGALG00000008725, ENSGALG00000010664, ENSGALG00000002175, ENSGALG00000016639	1642	10	8994	3.83423	1	0.775897	7.00293
GOTERM_BP_DIRECT	GO:0048568~embryonic organ development	7	0.28866	0.00391995	ENSGALG00000016078, ENSGALG00000006052, ENSGALG00000012329, ENSGALG00000006038, ENSGALG00000009612, ENSGALG00000008912, ENSGALG00000002003	1642	10	8994	3.83423	1	0.775897	7.00293
GOTERM_MF_DIRECT	GO:0001228~transcriptional activator activity, RNA polymerase II transcription regulatory region sequence-specific binding	20	0.824742	0.00411345	ENSGALG00000025875, ENSGALG00000016662, ENSGALG00000009645, ENSGALG00000005909, ENSGALG00000015013, ENSGALG00000010936, ENSGALG00000001817, ENSGALG00000014208, ENSGALG00000016123, ENSGALG00000028128, ENSGALG00000026264, ENSGALG00000016022, ENSGALG00000001277, ENSGALG00000006726, ENSGALG00000008253, ENSGALG00000011657, ENSGALG00000011992, ENSGALG00000009277, ENSGALG00000007184, ENSGALG00000005352	1545	57	8532	1.93766	0.98913	0.475844	6.37695
GOTERM_MF_DIRECT	GO:0003713~transcription coactivator activity	28	1.15464	0.00462658	ENSGALG00000016662, ENSGALG00000016680, ENSGALG00000008167, ENSGALG00000005396, ENSGALG00000019438, ENSGALG00000012770, ENSGALG00000016456, ENSGALG00000014836, ENSGALG00000012775, ENSGALG00000000751, ENSGALG00000005230, ENSGALG00000012986, ENSGALG00000006726, ENSGALG00000001093, ENSGALG00000015573, ENSGALG00000026787, ENSGALG00000006688, ENSGALG00000016238, ENSGALG00000001978, ENSGALG00000003786,…	1545	91	8532	1.69918	0.993824	0.470537	7.14514
GOTERM_BP_DIRECT	GO:0048873~homeostasis of number of cells within a tissue	10	0.412371	0.00530482	ENSGALG00000002859, ENSGALG00000005909, ENSGALG00000004821, ENSGALG00000015664, ENSGALG00000001482, ENSGALG00000008847, ENSGALG00000012885, ENSGALG00000004386, ENSGALG00000013165, ENSGALG00000003951	1642	20	8994	2.73873	1	0.841392	9.3641
GOTERM_BP_DIRECT	GO:0090630~activation of GTPase activity	17	0.701031	0.00556603	ENSGALG00000001225, ENSGALG00000009855, ENSGALG00000005295, ENSGALG00000016776, ENSGALG00000003322, ENSGALG00000001420, ENSGALG00000008410, ENSGALG00000010190, ENSGALG00000010564, ENSGALG00000005856, ENSGALG00000027299, ENSGALG00000004578, ENSGALG00000005737, ENSGALG00000010967, ENSGALG00000006706, ENSGALG00000006793, ENSGALG00000027854	1642	46	8994	2.02428	1	0.829875	9.80306
GOTERM_BP_DIRECT	GO:0007165~signal transduction	56	2.30928	0.00576979	ENSGALG00000022702, ENSGALG00000012799, ENSGALG00000011562, ENSGALG00000010325, ENSGALG00000004510, ENSGALG00000008527, ENSGALG00000011329, ENSGALG00000011260, ENSGALG00000005076, ENSGALG00000006726, ENSGALG00000017150, ENSGALG00000005807, ENSGALG00000011966, ENSGALG00000010031, ENSGALG00000012219, ENSGALG00000014369, ENSGALG00000003920, ENSGALG00000013941, ENSGALG00000015645, ENSGALG00000011537,…	1642	218	8994	1.40706	1	0.8164	10.1441
GOTERM_BP_DIRECT	GO:0007189~adenylate cyclase-activating G-protein coupled receptor signaling pathway	11	0.453608	0.00647506	ENSGALG00000010572, ENSGALG00000012433, ENSGALG00000028440, ENSGALG00000007779, ENSGALG00000011699, ENSGALG00000005476, ENSGALG00000016298, ENSGALG00000002632, ENSGALG00000009509, ENSGALG00000013060, ENSGALG00000003837	1642	24	8994	2.51051	1	0.829146	11.315
GOTERM_BP_DIRECT	GO:0016477~cell migration	28	1.15464	0.00715345	ENSGALG00000006856, ENSGALG00000002678, ENSGALG00000012447, ENSGALG00000011031, ENSGALG00000011848, ENSGALG00000009781, ENSGALG00000003634, ENSGALG00000006409, ENSGALG00000008974, ENSGALG00000013427, ENSGALG00000012205, ENSGALG00000013605, ENSGALG00000015403, ENSGALG00000006038, ENSGALG00000008934, ENSGALG00000023303, ENSGALG00000016236, ENSGALG00000009650, ENSGALG00000009612, ENSGALG00000002759,…	1642	93	8994	1.64913	1	0.838387	12.4277
GOTERM_BP_DIRECT	GO:0061512~protein localization to cilium	7	0.28866	0.00730048	ENSGALG00000002719, ENSGALG00000009318, ENSGALG00000010956, ENSGALG00000009570, ENSGALG00000012188, ENSGALG00000014876, ENSGALG00000016477	1642	11	8994	3.48566	1	0.825161	12.6671
GOTERM_BP_DIRECT	GO:0006171~cAMP biosynthetic process	7	0.28866	0.00730048	ENSGALG00000012433, ENSGALG00000007779, ENSGALG00000011699, ENSGALG00000016298, ENSGALG00000002632, ENSGALG00000013060, ENSGALG00000003837	1642	11	8994	3.48566	1	0.825161	12.6671
GOTERM_BP_DIRECT	GO:0043524~negative regulation of neuron apoptotic process	21	0.865979	0.00815179	ENSGALG00000023430, ENSGALG00000016680, ENSGALG00000010811, ENSGALG00000010485, ENSGALG00000016083, ENSGALG00000019842, ENSGALG00000002175, ENSGALG00000012885, ENSGALG00000010379, ENSGALG00000012865, ENSGALG00000013568, ENSGALG00000015529, ENSGALG00000027299, ENSGALG00000007140, ENSGALG00000015434, ENSGALG00000014922, ENSGALG00000008934, ENSGALG00000026200, ENSGALG00000016745, ENSGALG00000001690,…	1642	64	8994	1.79729	1	0.840144	14.0412
GOTERM_MF_DIRECT	GO:0005509~calcium ion binding	94	3.87629	0.00875472	ENSGALG00000003833, ENSGALG00000010793, ENSGALG00000014355, ENSGALG00000008569, ENSGALG00000009855, ENSGALG00000009705, ENSGALG00000003777, ENSGALG00000026674, ENSGALG00000004960, ENSGALG00000000608, ENSGALG00000019233, ENSGALG00000012193, ENSGALG00000015351, ENSGALG00000008907, ENSGALG00000001884, ENSGALG00000020989, ENSGALG00000011823, ENSGALG00000012942, ENSGALG00000012906, ENSGALG00000012941,…	1545	409	8532	1.26919	0.999935	0.657609	13.1137
GOTERM_BP_DIRECT	GO:0030900~forebrain development	11	0.453608	0.00905754	ENSGALG00000003805, ENSGALG00000007843, ENSGALG00000017180, ENSGALG00000007000, ENSGALG00000001772, ENSGALG00000017056, ENSGALG00000015770, ENSGALG00000011531, ENSGALG00000015013, ENSGALG00000008400, ENSGALG00000005508	1642	25	8994	2.41009	1	0.85411	15.4807
GOTERM_BP_DIRECT	GO:0048589~developmental growth	9	0.371134	0.00930124	ENSGALG00000015824, ENSGALG00000006726, ENSGALG00000012329, ENSGALG00000007870, ENSGALG00000010485, ENSGALG00000004850, ENSGALG00000001449, ENSGALG00000011630, ENSGALG00000002003	1642	18	8994	2.73873	1	0.846321	15.8641
GOTERM_BP_DIRECT	GO:0019933~cAMP-mediated signaling	9	0.371134	0.00930124	ENSGALG00000012433, ENSGALG00000007779, ENSGALG00000008499, ENSGALG00000011699, ENSGALG00000016298, ENSGALG00000013143, ENSGALG00000013060, ENSGALG00000004386, ENSGALG00000003837	1642	18	8994	2.73873	1	0.846321	15.8641
GOTERM_MF_DIRECT	GO:0004012~phospholipid-translocating ATPase activity	8	0.329897	0.0104077	ENSGALG00000001084, ENSGALG00000012656, ENSGALG00000016835, ENSGALG00000008839, ENSGALG00000017106, ENSGALG00000016746, ENSGALG00000001662, ENSGALG00000014236	1545	15	8532	2.94524	0.99999	0.682636	15.4012
GOTERM_BP_DIRECT	GO:0006606~protein import into nucleus	13	0.536082	0.0105335	ENSGALG00000009549, ENSGALG00000017009, ENSGALG00000013823, ENSGALG00000003383, ENSGALG00000003830, ENSGALG00000009934, ENSGALG00000005807, ENSGALG00000028836, ENSGALG00000011091, ENSGALG00000015713, ENSGALG00000003584, ENSGALG00000023303, ENSGALG00000012280	1642	33	8994	2.15779	1	0.866841	17.7776
GOTERM_BP_DIRECT	GO:0045880~positive regulation of smoothened signaling pathway	8	0.329897	0.0108947	ENSGALG00000016509, ENSGALG00000017180, ENSGALG00000002447, ENSGALG00000005401, ENSGALG00000023857, ENSGALG00000010170, ENSGALG00000003324, ENSGALG00000012668	1642	15	8994	2.92132	1	0.862813	18.3307
GOTERM_BP_DIRECT	GO:0031929~TOR signaling	7	0.28866	0.0123701	ENSGALG00000006726, ENSGALG00000004816, ENSGALG00000005198, ENSGALG00000003339, ENSGALG00000005547, ENSGALG00000027999, ENSGALG00000008104	1642	12	8994	3.19519	1	0.884039	20.5534
GOTERM_BP_DIRECT	GO:0043393~regulation of protein binding	7	0.28866	0.0123701	ENSGALG00000003782, ENSGALG00000015770, ENSGALG00000016083, ENSGALG00000009320, ENSGALG00000006038, ENSGALG00000026796, ENSGALG00000013049	1642	12	8994	3.19519	1	0.884039	20.5534
GOTERM_BP_DIRECT	GO:0035137~hindlimb morphogenesis	6	0.247423	0.0132019	ENSGALG00000016680, ENSGALG00000009270, ENSGALG00000008253, ENSGALG00000027513, ENSGALG00000009723, ENSGALG00000002003	1642	9	8994	3.65164	1	0.889234	21.7813
GOTERM_BP_DIRECT	GO:0035556~intracellular signal transduction	52	2.14433	0.0134264	ENSGALG00000004378, ENSGALG00000010772, ENSGALG00000015758, ENSGALG00000011031, ENSGALG00000008907, ENSGALG00000005076, ENSGALG00000017056, ENSGALG00000005805, ENSGALG00000006038, ENSGALG00000016834, ENSGALG00000011517, ENSGALG00000029095, ENSGALG00000010313, ENSGALG00000014094, ENSGALG00000009368, ENSGALG00000010040, ENSGALG00000009320, ENSGALG00000012351, ENSGALG00000009293, ENSGALG00000012865,…	1642	208	8994	1.36937	1	0.882903	22.1095
GOTERM_MF_DIRECT	GO:0005234~extracellular-glutamate-gated ion channel activity	7	0.28866	0.0187301	ENSGALG00000011809, ENSGALG00000008512, ENSGALG00000007278, ENSGALG00000015434, ENSGALG00000010397, ENSGALG00000017178, ENSGALG00000009405	1545	13	8532	2.97356	1	0.848265	26.0855
GOTERM_BP_DIRECT	GO:0035249~synaptic transmission, glutamatergic	7	0.28866	0.0194789	ENSGALG00000008415, ENSGALG00000026462, ENSGALG00000015434, ENSGALG00000010397, ENSGALG00000019382, ENSGALG00000011562, ENSGALG00000005319	1642	13	8994	2.94941	1	0.950028	30.4843
GOTERM_BP_DIRECT	GO:0051966~regulation of synaptic transmission, glutamatergic	7	0.28866	0.0194789	ENSGALG00000007161, ENSGALG00000017238, ENSGALG00000003839, ENSGALG00000009320, ENSGALG00000019382, ENSGALG00000010319, ENSGALG00000012297	1642	13	8994	2.94941	1	0.950028	30.4843
GOTERM_MF_DIRECT	GO:0000977~RNA polymerase II regulatory region sequence-specific DNA binding	26	1.07216	0.0198717	ENSGALG00000016662, ENSGALG00000016680, ENSGALG00000009645, ENSGALG00000005909, ENSGALG00000019842, ENSGALG00000002658, ENSGALG00000012775, ENSGALG00000016022, ENSGALG00000004029, ENSGALG00000006726, ENSGALG00000011657, ENSGALG00000016926, ENSGALG00000005352, ENSGALG00000025875, ENSGALG00000015013, ENSGALG00000016123, ENSGALG00000028128, ENSGALG00000006599, ENSGALG00000016207, ENSGALG00000011958,…	1545	92	8532	1.56066	1	0.84037	27.4482
GOTERM_BP_DIRECT	GO:0006334~nucleosome assembly	16	0.659794	0.0204091	ENSGALG00000006037, ENSGALG00000011759, ENSGALG00000023702, ENSGALG00000006446, ENSGALG00000027257, ENSGALG00000011783, ENSGALG00000013464, ENSGALG00000027594, ENSGALG00000027064, ENSGALG00000001126, ENSGALG00000027571, ENSGALG00000027969, ENSGALG00000004386, ENSGALG00000027382, ENSGALG00000027842, ENSGALG00000005035	1642	48	8994	1.82582	1	0.951202	31.6933
GOTERM_MF_DIRECT	GO:0005085~guanyl-nucleotide exchange factor activity	11	0.453608	0.0204129	ENSGALG00000002525, ENSGALG00000028043, ENSGALG00000009480, ENSGALG00000010435, ENSGALG00000004671, ENSGALG00000010967, ENSGALG00000005030, ENSGALG00000004816, ENSGALG00000000993, ENSGALG00000009781, ENSGALG00000012093	1545	28	8532	2.16949	1	0.824542	28.086
GOTERM_BP_DIRECT	GO:0008333~endosome to lysosome transport	10	0.412371	0.0206692	ENSGALG00000012689, ENSGALG00000010459, ENSGALG00000011569, ENSGALG00000016167, ENSGALG00000009096, ENSGALG00000011938, ENSGALG00000007616, ENSGALG00000026796, ENSGALG00000005902, ENSGALG00000012301	1642	24	8994	2.28228	1	0.947433	32.0278
GOTERM_BP_DIRECT	GO:0021902~commitment of neuronal cell to specific neuron type in forebrain	4	0.164948	0.0209446	ENSGALG00000005909, ENSGALG00000012123, ENSGALG00000008135, ENSGALG00000007184	1642	4	8994	5.47747	1	0.943793	32.3802
GOTERM_BP_DIRECT	GO:0042297~vocal learning	4	0.164948	0.0209446	ENSGALG00000009107, ENSGALG00000009424, ENSGALG00000001449, ENSGALG00000015635	1642	4	8994	5.47747	1	0.943793	32.3802
GOTERM_MF_DIRECT	GO:0008574~ATP-dependent microtubule motor activity, plus-end-directed	6	0.247423	0.021731	ENSGALG00000007215, ENSGALG00000011581, ENSGALG00000008725, ENSGALG00000010664, ENSGALG00000006790, ENSGALG00000002175	1545	10	8532	3.3134	1	0.821212	29.6174
GOTERM_MF_DIRECT	GO:0001078~transcriptional repressor activity, RNA polymerase II core promoter proximal region sequence-specific binding	17	0.701031	0.0219038	ENSGALG00000016078, ENSGALG00000016933, ENSGALG00000023577, ENSGALG00000001817, ENSGALG00000011916, ENSGALG00000015305, ENSGALG00000004510, ENSGALG00000012775, ENSGALG00000014776, ENSGALG00000006726, ENSGALG00000009424, ENSGALG00000001093, ENSGALG00000011963, ENSGALG00000010619, ENSGALG00000026787, ENSGALG00000008250, ENSGALG00000007762	1545	53	8532	1.77131	1	0.802042	29.8158
GOTERM_BP_DIRECT	GO:0060173~limb development	12	0.494845	0.0219078	ENSGALG00000001079, ENSGALG00000016509, ENSGALG00000007000, ENSGALG00000008253, ENSGALG00000012329, ENSGALG00000005396, ENSGALG00000015511, ENSGALG00000001253, ENSGALG00000002155, ENSGALG00000006071, ENSGALG00000009415, ENSGALG00000003283	1642	32	8994	2.05405	1	0.945453	33.5994
GOTERM_BP_DIRECT	GO:0070509~calcium ion import	6	0.247423	0.0224839	ENSGALG00000008544, ENSGALG00000017044, ENSGALG00000008591, ENSGALG00000005332, ENSGALG00000016226, ENSGALG00000005215	1642	10	8994	3.28648	1	0.944231	34.3187
GOTERM_MF_DIRECT	GO:0000287~magnesium ion binding	34	1.40206	0.0229525	ENSGALG00000006681, ENSGALG00000010827, ENSGALG00000026674, ENSGALG00000003476, ENSGALG00000012192, ENSGALG00000003634, ENSGALG00000010582, ENSGALG00000009970, ENSGALG00000012656, ENSGALG00000016835, ENSGALG00000016406, ENSGALG00000011517, ENSGALG00000012805, ENSGALG00000010313, ENSGALG00000014094, ENSGALG00000016592, ENSGALG00000027545, ENSGALG00000006098, ENSGALG00000002397, ENSGALG00000017106,…	1545	130	8532	1.4443	1	0.796487	31.0092
GOTERM_BP_DIRECT	GO:0009116~nucleoside metabolic process	5	0.206186	0.0242013	ENSGALG00000005064, ENSGALG00000016592, ENSGALG00000007793, ENSGALG00000013728, ENSGALG00000021539	1642	7	8994	3.91248	1	0.95068	36.4193
GOTERM_BP_DIRECT	GO:0055001~muscle cell development	5	0.206186	0.0242013	ENSGALG00000017122, ENSGALG00000027391, ENSGALG00000000840, ENSGALG00000003886, ENSGALG00000013684	1642	7	8994	3.91248	1	0.95068	36.4193
GOTERM_BP_DIRECT	GO:0007010~cytoskeleton organization	19	0.783505	0.0251693	ENSGALG00000029095, ENSGALG00000008499, ENSGALG00000010313, ENSGALG00000011848, ENSGALG00000013045, ENSGALG00000004034, ENSGALG00000009781, ENSGALG00000013056, ENSGALG00000005763, ENSGALG00000017139, ENSGALG00000009344, ENSGALG00000009048, ENSGALG00000016281, ENSGALG00000012018, ENSGALG00000003123, ENSGALG00000012821, ENSGALG00000010031, ENSGALG00000004386, ENSGALG00000016420	1642	62	8994	1.67858	1	0.951853	37.5752
GOTERM_BP_DIRECT	GO:0035115~embryonic forelimb morphogenesis	9	0.371134	0.025939	ENSGALG00000025875, ENSGALG00000001079, ENSGALG00000016473, ENSGALG00000008253, ENSGALG00000005401, ENSGALG00000015013, ENSGALG00000027513, ENSGALG00000008250, ENSGALG00000012775	1642	21	8994	2.34749	1	0.951815	38.48
GOTERM_BP_DIRECT	GO:0008104~protein localization	11	0.453608	0.0276704	ENSGALG00000009895, ENSGALG00000007215, ENSGALG00000001772, ENSGALG00000008415, ENSGALG00000011581, ENSGALG00000007278, ENSGALG00000002403, ENSGALG00000010664, ENSGALG00000017062, ENSGALG00000016707, ENSGALG00000027853	1642	29	8994	2.07766	1	0.956837	40.4702
GOTERM_BP_DIRECT	GO:0007275~multicellular organism development	44	1.81443	0.0276963	ENSGALG00000028946, ENSGALG00000001079, ENSGALG00000028236, ENSGALG00000008433, ENSGALG00000006365, ENSGALG00000003699, ENSGALG00000012123, ENSGALG00000011243, ENSGALG00000012799, ENSGALG00000003324, ENSGALG00000015305, ENSGALG00000011562, ENSGALG00000004510, ENSGALG00000017139, ENSGALG00000026849, ENSGALG00000026787, ENSGALG00000009853, ENSGALG00000011630, ENSGALG00000009723, ENSGALG00000021665,…	1642	178	8994	1.35398	1	0.952918	40.4995
GOTERM_BP_DIRECT	GO:0018105~peptidyl-serine phosphorylation	24	0.989691	0.0284225	ENSGALG00000002719, ENSGALG00000006681, ENSGALG00000010313, ENSGALG00000014094, ENSGALG00000006014, ENSGALG00000002663, ENSGALG00000011438, ENSGALG00000010040, ENSGALG00000002403, ENSGALG00000012885, ENSGALG00000003339, ENSGALG00000003479, ENSGALG00000006426, ENSGALG00000004743, ENSGALG00000007161, ENSGALG00000006829, ENSGALG00000017056, ENSGALG00000002279, ENSGALG00000003537, ENSGALG00000012036,…	1642	85	8994	1.54658	1	0.952642	41.3157
GOTERM_BP_DIRECT	GO:0007162~negative regulation of cell adhesion	7	0.28866	0.0289276	ENSGALG00000004212, ENSGALG00000016083, ENSGALG00000006038, ENSGALG00000009612, ENSGALG00000007905, ENSGALG00000016138, ENSGALG00000005483	1642	14	8994	2.73873	1	0.951253	41.877
GOTERM_MF_DIRECT	GO:0008270~zinc ion binding	143	5.89691	0.0309271	ENSGALG00000000747, ENSGALG00000012265, ENSGALG00000004044, ENSGALG00000015305, ENSGALG00000008909, ENSGALG00000008974, ENSGALG00000001884, ENSGALG00000002883, ENSGALG00000000427, ENSGALG00000006424, ENSGALG00000015454, ENSGALG00000009048, ENSGALG00000012986, ENSGALG00000013681, ENSGALG00000006726, ENSGALG00000009249, ENSGALG00000001615, ENSGALG00000009572, ENSGALG00000002941, ENSGALG00000012256,…	1545	681	8532	1.15961	1	0.868299	39.4808
GOTERM_BP_DIRECT	GO:0048701~embryonic cranial skeleton morphogenesis	8	0.329897	0.0325849	ENSGALG00000014776, ENSGALG00000015896, ENSGALG00000007870, ENSGALG00000014208, ENSGALG00000003324, ENSGALG00000012775, ENSGALG00000023303, ENSGALG00000005508	1642	18	8994	2.43443	1	0.963837	45.7929
GOTERM_BP_DIRECT	GO:0042391~regulation of membrane potential	13	0.536082	0.0332891	ENSGALG00000016749, ENSGALG00000027420, ENSGALG00000015410, ENSGALG00000015924, ENSGALG00000004146, ENSGALG00000007215, ENSGALG00000006908, ENSGALG00000016074, ENSGALG00000011858, ENSGALG00000011082, ENSGALG00000028292, ENSGALG00000015944, ENSGALG00000004980	1642	38	8994	1.87387	1	0.963327	46.5178
GOTERM_MF_DIRECT	GO:0001085~RNA polymerase II transcription factor binding	6	0.247423	0.0340073	ENSGALG00000016078, ENSGALG00000016662, ENSGALG00000006726, ENSGALG00000005909, ENSGALG00000016123, ENSGALG00000005352	1545	11	8532	3.01218	1	0.878594	42.4838
GOTERM_BP_DIRECT	GO:0046777~protein autophosphorylation	25	1.03093	0.0341616	ENSGALG00000004967, ENSGALG00000002663, ENSGALG00000015958, ENSGALG00000023857, ENSGALG00000002403, ENSGALG00000012770, ENSGALG00000012248, ENSGALG00000007396, ENSGALG00000007647, ENSGALG00000005777, ENSGALG00000003339, ENSGALG00000003479, ENSGALG00000002759, ENSGALG00000006426, ENSGALG00000004743, ENSGALG00000009403, ENSGALG00000007161, ENSGALG00000006829, ENSGALG00000012363, ENSGALG00000012036,…	1642	91	8994	1.5048	1	0.963449	47.403
GOTERM_BP_DIRECT	GO:0045165~cell fate commitment	12	0.494845	0.0342704	ENSGALG00000016662, ENSGALG00000001079, ENSGALG00000006726, ENSGALG00000003126, ENSGALG00000005401, ENSGALG00000005909, ENSGALG00000005396, ENSGALG00000015089, ENSGALG00000016123, ENSGALG00000015305, ENSGALG00000005352, ENSGALG00000014235	1642	34	8994	1.93322	1	0.960789	47.5124
GOTERM_BP_DIRECT	GO:0001662~behavioral fear response	9	0.371134	0.0344167	ENSGALG00000008415, ENSGALG00000013961, ENSGALG00000015434, ENSGALG00000028828, ENSGALG00000015419, ENSGALG00000006997, ENSGALG00000012885, ENSGALG00000015305, ENSGALG00000005198	1642	22	8994	2.24078	1	0.958223	47.6592
GOTERM_BP_DIRECT	GO:0042472~inner ear morphogenesis	11	0.453608	0.0349199	ENSGALG00000008747, ENSGALG00000006726, ENSGALG00000022702, ENSGALG00000016069, ENSGALG00000005909, ENSGALG00000005396, ENSGALG00000006811, ENSGALG00000004364, ENSGALG00000003324, ENSGALG00000017106, ENSGALG00000012775	1642	30	8994	2.0084	1	0.95705	48.1611
GOTERM_BP_DIRECT	GO:0051898~negative regulation of protein kinase B signaling	10	0.412371	0.0350582	ENSGALG00000005646, ENSGALG00000009096, ENSGALG00000006908, ENSGALG00000012292, ENSGALG00000004816, ENSGALG00000003634, ENSGALG00000008701, ENSGALG00000003712, ENSGALG00000016174, ENSGALG00000006382	1642	26	8994	2.10672	1	0.954434	48.2982
GOTERM_BP_DIRECT	GO:0045787~positive regulation of cell cycle	6	0.247423	0.0351368	ENSGALG00000000551, ENSGALG00000013568, ENSGALG00000017331, ENSGALG00000009612, ENSGALG00000008250, ENSGALG00000015305	1642	11	8994	2.98771	1	0.951532	48.3761
GOTERM_BP_DIRECT	GO:0007155~cell adhesion	33	1.36082	0.0373803	ENSGALG00000008747, ENSGALG00000009107, ENSGALG00000015001, ENSGALG00000016616, ENSGALG00000016138, ENSGALG00000005788, ENSGALG00000006409, ENSGALG00000002845, ENSGALG00000007927, ENSGALG00000013427, ENSGALG00000006802, ENSGALG00000001774, ENSGALG00000008263, ENSGALG00000009523, ENSGALG00000011778, ENSGALG00000010518, ENSGALG00000011350, ENSGALG00000013207, ENSGALG00000003628, ENSGALG00000008340,…	1642	129	8994	1.40121	1	0.957308	50.5503
GOTERM_MF_DIRECT	GO:0008139~nuclear localization sequence binding	7	0.28866	0.0394871	ENSGALG00000009549, ENSGALG00000017009, ENSGALG00000013823, ENSGALG00000003383, ENSGALG00000003830, ENSGALG00000003584, ENSGALG00000004650	1545	15	8532	2.57709	1	0.902324	47.4837
GOTERM_BP_DIRECT	GO:0051894~positive regulation of focal adhesion assembly	7	0.28866	0.0409495	ENSGALG00000011605, ENSGALG00000014922, ENSGALG00000016171, ENSGALG00000028774, ENSGALG00000006382, ENSGALG00000016807, ENSGALG00000009723	1642	15	8994	2.55615	1	0.966211	53.8319
GOTERM_BP_DIRECT	GO:0006470~protein dephosphorylation	7	0.28866	0.0409495	ENSGALG00000010026, ENSGALG00000007820, ENSGALG00000008199, ENSGALG00000003634, ENSGALG00000010273, ENSGALG00000012885, ENSGALG00000010325	1642	15	8994	2.55615	1	0.966211	53.8319
GOTERM_BP_DIRECT	GO:0007626~locomotory behavior	16	0.659794	0.0409895	ENSGALG00000011350, ENSGALG00000009289, ENSGALG00000002124, ENSGALG00000006098, ENSGALG00000003634, ENSGALG00000016138, ENSGALG00000004829, ENSGALG00000003999, ENSGALG00000017238, ENSGALG00000010533, ENSGALG00000011699, ENSGALG00000008415, ENSGALG00000011762, ENSGALG00000015419, ENSGALG00000012297, ENSGALG00000007184	1642	52	8994	1.68537	1	0.96386	53.8675
GOTERM_BP_DIRECT	GO:1900181~negative regulation of protein localization to nucleus	5	0.206186	0.0415053	ENSGALG00000017056, ENSGALG00000010040, ENSGALG00000004816, ENSGALG00000023612, ENSGALG00000001644	1642	8	8994	3.42342	1	0.96291	54.324
GOTERM_BP_DIRECT	GO:0016337~single organismal cell-cell adhesion	12	0.494845	0.0420071	ENSGALG00000013579, ENSGALG00000005160, ENSGALG00000011350, ENSGALG00000000957, ENSGALG00000012363, ENSGALG00000017002, ENSGALG00000011357, ENSGALG00000001768, ENSGALG00000003712, ENSGALG00000006259, ENSGALG00000027853, ENSGALG00000004386	1642	35	8994	1.87799	1	0.961933	54.7639
GOTERM_MF_DIRECT	GO:0004842~ubiquitin-protein transferase activity	30	1.23711	0.0420931	ENSGALG00000004659, ENSGALG00000005982, ENSGALG00000008218, ENSGALG00000015186, ENSGALG00000001957, ENSGALG00000005684, ENSGALG00000001473, ENSGALG00000010217, ENSGALG00000010539, ENSGALG00000003566, ENSGALG00000014974, ENSGALG00000004650, ENSGALG00000003381, ENSGALG00000002755, ENSGALG00000016369, ENSGALG00000001253, ENSGALG00000010643, ENSGALG00000015809, ENSGALG00000009907, ENSGALG00000010541,…	1545	117	8532	1.41598	1	0.905467	49.7157
GOTERM_MF_DIRECT	GO:0003774~motor activity	10	0.412371	0.042314	ENSGALG00000028134, ENSGALG00000000779, ENSGALG00000005644, ENSGALG00000004641, ENSGALG00000016837, ENSGALG00000004150, ENSGALG00000004294, ENSGALG00000028102, ENSGALG00000026748, ENSGALG00000000674	1545	27	8532	2.04531	1	0.895496	49.9007
GOTERM_BP_DIRECT	GO:0007399~nervous system development	20	0.824742	0.0423872	ENSGALG00000002841, ENSGALG00000013167, ENSGALG00000008747, ENSGALG00000009173, ENSGALG00000006908, ENSGALG00000016069, ENSGALG00000012275, ENSGALG00000017254, ENSGALG00000009612, ENSGALG00000007366, ENSGALG00000012449, ENSGALG00000004919, ENSGALG00000010572, ENSGALG00000028443, ENSGALG00000015770, ENSGALG00000005815, ENSGALG00000006038, ENSGALG00000006793, ENSGALG00000010809, ENSGALG00000007100	1642	70	8994	1.56499	1	0.960598	55.0946
GOTERM_MF_DIRECT	GO:0004402~histone acetyltransferase activity	9	0.371134	0.0426932	ENSGALG00000008241, ENSGALG00000016624, ENSGALG00000011992, ENSGALG00000007169, ENSGALG00000009564, ENSGALG00000006688, ENSGALG00000004570, ENSGALG00000007762, ENSGALG00000005035	1545	23	8532	2.16091	1	0.886462	50.2169
GOTERM_BP_DIRECT	GO:0060041~retina development in camera-type eye	10	0.412371	0.0443424	ENSGALG00000006370, ENSGALG00000006802, ENSGALG00000009318, ENSGALG00000015472, ENSGALG00000012123, ENSGALG00000009861, ENSGALG00000005986, ENSGALG00000015305, ENSGALG00000001334, ENSGALG00000013189	1642	27	8994	2.02869	1	0.963899	56.7595
GOTERM_BP_DIRECT	GO:0043087~regulation of GTPase activity	10	0.412371	0.0443424	ENSGALG00000003805, ENSGALG00000015410, ENSGALG00000019261, ENSGALG00000015403, ENSGALG00000011680, ENSGALG00000009293, ENSGALG00000003339, ENSGALG00000006130, ENSGALG00000000221, ENSGALG00000005834	1642	27	8994	2.02869	1	0.963899	56.7595
GOTERM_BP_DIRECT	GO:0001707~mesoderm formation	9	0.371134	0.0445876	ENSGALG00000001079, ENSGALG00000002287, ENSGALG00000013568, ENSGALG00000007870, ENSGALG00000008400, ENSGALG00000026787, ENSGALG00000001169, ENSGALG00000008073, ENSGALG00000002003	1642	23	8994	2.14336	1	0.962266	56.9641
GOTERM_MF_DIRECT	GO:0046872~metal ion binding	123	5.07216	0.0446442	ENSGALG00000010273, ENSGALG00000002552, ENSGALG00000020458, ENSGALG00000007652, ENSGALG00000009047, ENSGALG00000011137, ENSGALG00000011963, ENSGALG00000011965, ENSGALG00000001236, ENSGALG00000008179, ENSGALG00000011537, ENSGALG00000017205, ENSGALG00000001403, ENSGALG00000012865, ENSGALG00000004829, ENSGALG00000014459, ENSGALG00000015849, ENSGALG00000009946, ENSGALG00000011126, ENSGALG00000009158,…	1545	586	8532	1.15912	1	0.886769	51.8143
GOTERM_BP_DIRECT	GO:0070198~protein localization to chromosome, telomeric region	4	0.164948	0.0452818	ENSGALG00000007843, ENSGALG00000002663, ENSGALG00000014614, ENSGALG00000011438	1642	5	8994	4.38197	1	0.961908	57.5384
GOTERM_BP_DIRECT	GO:0072383~plus-end-directed vesicle transport along microtubule	4	0.164948	0.0452818	ENSGALG00000012689, ENSGALG00000007215, ENSGALG00000008934, ENSGALG00000008095	1642	5	8994	4.38197	1	0.961908	57.5384
GOTERM_MF_DIRECT	GO:0008565~protein transporter activity	14	0.57732	0.0511848	ENSGALG00000009549, ENSGALG00000017009, ENSGALG00000013823, ENSGALG00000006799, ENSGALG00000004529, ENSGALG00000003383, ENSGALG00000011114, ENSGALG00000005807, ENSGALG00000028836, ENSGALG00000002632, ENSGALG00000000848, ENSGALG00000003584, ENSGALG00000027575, ENSGALG00000004375	1545	45	8532	1.71806	1	0.909425	56.8259
GOTERM_BP_DIRECT	GO:0061024~membrane organization	6	0.247423	0.0513988	ENSGALG00000017122, ENSGALG00000011163, ENSGALG00000008569, ENSGALG00000003886, ENSGALG00000013684, ENSGALG00000008104	1642	12	8994	2.73873	1	0.974097	62.2954
GOTERM_BP_DIRECT	GO:0060079~excitatory postsynaptic potential	6	0.247423	0.0513988	ENSGALG00000007161, ENSGALG00000007278, ENSGALG00000015434, ENSGALG00000010397, ENSGALG00000010379, ENSGALG00000012280	1642	12	8994	2.73873	1	0.974097	62.2954
GOTERM_BP_DIRECT	GO:0019827~stem cell population maintenance	11	0.453608	0.0531574	ENSGALG00000028828, ENSGALG00000008595, ENSGALG00000005624, ENSGALG00000008250, ENSGALG00000016238, ENSGALG00000005911, ENSGALG00000002469, ENSGALG00000012000, ENSGALG00000003683, ENSGALG00000002003, ENSGALG00000006898	1642	32	8994	1.88288	1	0.975628	63.5667
GOTERM_MF_DIRECT	GO:0004674~protein serine/threonine kinase activity	39	1.60825	0.0533655	ENSGALG00000002130, ENSGALG00000006681, ENSGALG00000006014, ENSGALG00000003476, ENSGALG00000007396, ENSGALG00000003479, ENSGALG00000016512, ENSGALG00000006829, ENSGALG00000017056, ENSGALG00000002279, ENSGALG00000010709, ENSGALG00000005198, ENSGALG00000001362, ENSGALG00000016406, ENSGALG00000011517, ENSGALG00000002719, ENSGALG00000010313, ENSGALG00000014094, ENSGALG00000002663, ENSGALG00000009866,…	1545	163	8532	1.32129	1	0.909868	58.3851
GOTERM_MF_DIRECT	GO:0005246~calcium channel regulator activity	7	0.28866	0.0537841	ENSGALG00000003805, ENSGALG00000006014, ENSGALG00000009107, ENSGALG00000014355, ENSGALG00000005400, ENSGALG00000003537, ENSGALG00000003839	1545	16	8532	2.41602	1	0.902955	58.6784
GOTERM_BP_DIRECT	GO:0051297~centrosome organization	7	0.28866	0.0556988	ENSGALG00000010713, ENSGALG00000008340, ENSGALG00000009111, ENSGALG00000013602, ENSGALG00000008325, ENSGALG00000010325, ENSGALG00000000845	1642	16	8994	2.39639	1	0.978263	65.3326
GOTERM_BP_DIRECT	GO:0001568~blood vessel development	9	0.371134	0.0565467	ENSGALG00000015001, ENSGALG00000006390, ENSGALG00000012123, ENSGALG00000008883, ENSGALG00000009320, ENSGALG00000009612, ENSGALG00000003712, ENSGALG00000014974, ENSGALG00000008250	1642	24	8994	2.05405	1	0.978109	65.9035
GOTERM_MF_DIRECT	GO:0070679~inositol 1,4,5 trisphosphate binding	5	0.206186	0.0624915	ENSGALG00000008294, ENSGALG00000007972, ENSGALG00000017044, ENSGALG00000014071, ENSGALG00000003149	1545	9	8532	3.06796	1	0.927328	64.3554
GOTERM_MF_DIRECT	GO:0005247~voltage-gated chloride channel activity	5	0.206186	0.0624915	ENSGALG00000007561, ENSGALG00000009638, ENSGALG00000009674, ENSGALG00000004590, ENSGALG00000014695	1545	9	8532	3.06796	1	0.927328	64.3554
GOTERM_BP_DIRECT	GO:0060021~palate development	16	0.659794	0.0639736	ENSGALG00000025875, ENSGALG00000016509, ENSGALG00000012329, ENSGALG00000005396, ENSGALG00000015013, ENSGALG00000023577, ENSGALG00000008135, ENSGALG00000003324, ENSGALG00000010316, ENSGALG00000012775, ENSGALG00000016473, ENSGALG00000015472, ENSGALG00000002991, ENSGALG00000008250, ENSGALG00000016745, ENSGALG00000002003	1642	55	8994	1.59344	1	0.985976	70.5378
GOTERM_BP_DIRECT	GO:0022408~negative regulation of cell-cell adhesion	5	0.206186	0.064148	ENSGALG00000011605, ENSGALG00000016171, ENSGALG00000006038, ENSGALG00000006409, ENSGALG00000008073	1642	9	8994	3.04304	1	0.98512	70.6392
GOTERM_BP_DIRECT	GO:1904355~positive regulation of telomere capping	5	0.206186	0.064148	ENSGALG00000004967, ENSGALG00000004743, ENSGALG00000014614, ENSGALG00000011438, ENSGALG00000020003	1642	9	8994	3.04304	1	0.98512	70.6392
GOTERM_BP_DIRECT	GO:0061178~regulation of insulin secretion involved in cellular response to glucose stimulus	5	0.206186	0.064148	ENSGALG00000006681, ENSGALG00000011699, ENSGALG00000009107, ENSGALG00000011680, ENSGALG00000011896	1642	9	8994	3.04304	1	0.98512	70.6392
GOTERM_BP_DIRECT	GO:0007492~endoderm development	5	0.206186	0.064148	ENSGALG00000011605, ENSGALG00000003627, ENSGALG00000007870, ENSGALG00000008725, ENSGALG00000005624	1642	9	8994	3.04304	1	0.98512	70.6392
GOTERM_BP_DIRECT	GO:0048738~cardiac muscle tissue development	5	0.206186	0.064148	ENSGALG00000017122, ENSGALG00000023577, ENSGALG00000003634, ENSGALG00000003886, ENSGALG00000013684	1642	9	8994	3.04304	1	0.98512	70.6392
GOTERM_MF_DIRECT	GO:0046982~protein heterodimerization activity	20	0.824742	0.0650834	ENSGALG00000016680, ENSGALG00000028417, ENSGALG00000013402, ENSGALG00000014843, ENSGALG00000008442, ENSGALG00000010936, ENSGALG00000006445, ENSGALG00000012885, ENSGALG00000010273, ENSGALG00000000751, ENSGALG00000011809, ENSGALG00000001093, ENSGALG00000006950, ENSGALG00000028900, ENSGALG00000010706, ENSGALG00000001768, ENSGALG00000004386, ENSGALG00000027382, ENSGALG00000012378, ENSGALG00000027842	1545	74	8532	1.49252	1	0.928398	65.8986
GOTERM_BP_DIRECT	GO:0006355~regulation of transcription, DNA-templated	80	3.29897	0.0674038	ENSGALG00000016680, ENSGALG00000015599, ENSGALG00000028236, ENSGALG00000012266, ENSGALG00000014834, ENSGALG00000006365, ENSGALG00000012123, ENSGALG00000026761, ENSGALG00000010276, ENSGALG00000003324, ENSGALG00000012799, ENSGALG00000015305, ENSGALG00000008909, ENSGALG00000000427, ENSGALG00000002514, ENSGALG00000005521, ENSGALG00000023303, ENSGALG00000000983, ENSGALG00000023419, ENSGALG00000019713,…	1642	370	8994	1.18432	1	0.987174	72.471
GOTERM_MF_DIRECT	GO:0004890~GABA-A receptor activity	7	0.28866	0.070824	ENSGALG00000001695, ENSGALG00000007269, ENSGALG00000019144, ENSGALG00000014206, ENSGALG00000016745, ENSGALG00000015778, ENSGALG00000001690	1545	17	8532	2.2739	1	0.937881	69.0963
GOTERM_BP_DIRECT	GO:0048854~brain morphogenesis	6	0.247423	0.0713487	ENSGALG00000011329, ENSGALG00000009320, ENSGALG00000003720, ENSGALG00000003634, ENSGALG00000027853, ENSGALG00000005834	1642	13	8994	2.52806	1	0.989395	74.5457
GOTERM_BP_DIRECT	GO:0086010~membrane depolarization during action potential	6	0.247423	0.0713487	ENSGALG00000003833, ENSGALG00000007550, ENSGALG00000016868, ENSGALG00000005332, ENSGALG00000000730, ENSGALG00000011040	1642	13	8994	2.52806	1	0.989395	74.5457
GOTERM_BP_DIRECT	GO:0071108~protein K48-linked deubiquitination	6	0.247423	0.0713487	ENSGALG00000004455, ENSGALG00000015693, ENSGALG00000003802, ENSGALG00000009968, ENSGALG00000008974, ENSGALG00000004142	1642	13	8994	2.52806	1	0.989395	74.5457
GOTERM_BP_DIRECT	GO:0008277~regulation of G-protein coupled receptor protein signaling pathway	6	0.247423	0.0713487	ENSGALG00000028043, ENSGALG00000007667, ENSGALG00000014225, ENSGALG00000008974, ENSGALG00000027575, ENSGALG00000004142	1642	13	8994	2.52806	1	0.989395	74.5457
GOTERM_BP_DIRECT	GO:0032092~positive regulation of protein binding	12	0.494845	0.0721543	ENSGALG00000002841, ENSGALG00000007161, ENSGALG00000011605, ENSGALG00000011992, ENSGALG00000005396, ENSGALG00000015664, ENSGALG00000016386, ENSGALG00000016171, ENSGALG00000014749, ENSGALG00000008883, ENSGALG00000006979, ENSGALG00000008974	1642	38	8994	1.72973	1	0.989183	74.9508
GOTERM_BP_DIRECT	GO:0006890~retrograde vesicle-mediated transport, Golgi to ER	8	0.329897	0.0724937	ENSGALG00000012656, ENSGALG00000015012, ENSGALG00000015635, ENSGALG00000005637, ENSGALG00000017320, ENSGALG00000000845, ENSGALG00000006156, ENSGALG00000002603	1642	21	8994	2.08665	1	0.988641	75.1196
GOTERM_BP_DIRECT	GO:0030036~actin cytoskeleton organization	16	0.659794	0.0732479	ENSGALG00000005678, ENSGALG00000009650, ENSGALG00000004034, ENSGALG00000008043, ENSGALG00000016937, ENSGALG00000028457, ENSGALG00000005042, ENSGALG00000017103, ENSGALG00000012017, ENSGALG00000000681, ENSGALG00000004364, ENSGALG00000012093, ENSGALG00000005660, ENSGALG00000002080, ENSGALG00000008073, ENSGALG00000005834	1642	56	8994	1.56499	1	0.988397	75.491
GOTERM_MF_DIRECT	GO:0008331~high voltage-gated calcium channel activity	4	0.164948	0.0768327	ENSGALG00000003833, ENSGALG00000008591, ENSGALG00000005332, ENSGALG00000000730	1545	6	8532	3.68155	1	0.946245	72.1408
GOTERM_BP_DIRECT	GO:2000300~regulation of synaptic vesicle exocytosis	4	0.164948	0.0784525	ENSGALG00000007161, ENSGALG00000004146, ENSGALG00000016074, ENSGALG00000015944	1642	6	8994	3.65164	1	0.99103	77.9141
GOTERM_BP_DIRECT	GO:0051639~actin filament network formation	4	0.164948	0.0784525	ENSGALG00000013605, ENSGALG00000011068, ENSGALG00000002647, ENSGALG00000013124	1642	6	8994	3.65164	1	0.99103	77.9141
GOTERM_BP_DIRECT	GO:0035721~intraciliary retrograde transport	4	0.164948	0.0784525	ENSGALG00000017180, ENSGALG00000009318, ENSGALG00000010956, ENSGALG00000016477	1642	6	8994	3.65164	1	0.99103	77.9141
GOTERM_BP_DIRECT	GO:0016578~histone deubiquitination	4	0.164948	0.0784525	ENSGALG00000004455, ENSGALG00000003596, ENSGALG00000019438, ENSGALG00000004773	1642	6	8994	3.65164	1	0.99103	77.9141
GOTERM_BP_DIRECT	GO:0051930~regulation of sensory perception of pain	4	0.164948	0.0784525	ENSGALG00000007278, ENSGALG00000028292, ENSGALG00000011654, ENSGALG00000012297	1642	6	8994	3.65164	1	0.99103	77.9141
GOTERM_BP_DIRECT	GO:0097264~self proteolysis	4	0.164948	0.0784525	ENSGALG00000011556, ENSGALG00000001768, ENSGALG00000010706, ENSGALG00000009050	1642	6	8994	3.65164	1	0.99103	77.9141
GOTERM_BP_DIRECT	GO:0007435~salivary gland morphogenesis	4	0.164948	0.0784525	ENSGALG00000012363, ENSGALG00000012123, ENSGALG00000008400, ENSGALG00000009612	1642	6	8994	3.65164	1	0.99103	77.9141
GOTERM_BP_DIRECT	GO:0007018~microtubule-based movement	13	0.536082	0.0789548	ENSGALG00000005517, ENSGALG00000008725, ENSGALG00000013208, ENSGALG00000002175, ENSGALG00000005241, ENSGALG00000016639, ENSGALG00000012689, ENSGALG00000007215, ENSGALG00000006790, ENSGALG00000008095, ENSGALG00000011330, ENSGALG00000001111, ENSGALG00000013268	1642	43	8994	1.65598	1	0.99067	78.1356
GOTERM_BP_DIRECT	GO:0045892~negative regulation of transcription, DNA-templated	37	1.52577	0.0792889	ENSGALG00000016680, ENSGALG00000013402, ENSGALG00000007082, ENSGALG00000012329, ENSGALG00000011848, ENSGALG00000007393, ENSGALG00000002672, ENSGALG00000012775, ENSGALG00000000427, ENSGALG00000006726, ENSGALG00000025759, ENSGALG00000015993, ENSGALG00000014508, ENSGALG00000009853, ENSGALG00000009690, ENSGALG00000000983, ENSGALG00000027575, ENSGALG00000005035, ENSGALG00000015926, ENSGALG00000010936,…	1642	157	8994	1.29087	1	0.990207	78.2817
GOTERM_BP_DIRECT	GO:0006511~ubiquitin-dependent protein catabolic process	21	0.865979	0.0806789	ENSGALG00000004455, ENSGALG00000015693, ENSGALG00000007095, ENSGALG00000013961, ENSGALG00000016369, ENSGALG00000006767, ENSGALG00000015478, ENSGALG00000024112, ENSGALG00000013057, ENSGALG00000003799, ENSGALG00000008909, ENSGALG00000008974, ENSGALG00000009773, ENSGALG00000004142, ENSGALG00000011762, ENSGALG00000003147, ENSGALG00000005350, ENSGALG00000017269, ENSGALG00000004773, ENSGALG00000004834,…	1642	80	8994	1.43783	1	0.990366	78.8799
GOTERM_BP_DIRECT	GO:0048704~embryonic skeletal system morphogenesis	10	0.412371	0.0814537	ENSGALG00000023419, ENSGALG00000025875, ENSGALG00000023420, ENSGALG00000009270, ENSGALG00000012329, ENSGALG00000006908, ENSGALG00000005401, ENSGALG00000008135, ENSGALG00000027513, ENSGALG00000007260	1642	30	8994	1.82582	1	0.990167	79.2065
GOTERM_BP_DIRECT	GO:0007067~mitotic nuclear division	16	0.659794	0.0833641	ENSGALG00000027027, ENSGALG00000017006, ENSGALG00000005982, ENSGALG00000010471, ENSGALG00000000606, ENSGALG00000010325, ENSGALG00000007537, ENSGALG00000010039, ENSGALG00000002424, ENSGALG00000013710, ENSGALG00000003085, ENSGALG00000028900, ENSGALG00000001652, ENSGALG00000006688, ENSGALG00000012378, ENSGALG00000005834	1642	57	8994	1.53753	1	0.990614	79.9915
GOTERM_BP_DIRECT	GO:0016192~vesicle-mediated transport	16	0.659794	0.0833641	ENSGALG00000006799, ENSGALG00000012286, ENSGALG00000008725, ENSGALG00000005295, ENSGALG00000010654, ENSGALG00000007352, ENSGALG00000005139, ENSGALG00000015410, ENSGALG00000015450, ENSGALG00000001772, ENSGALG00000012336, ENSGALG00000005869, ENSGALG00000003702, ENSGALG00000000848, ENSGALG00000005637, ENSGALG00000015553	1642	57	8994	1.53753	1	0.990614	79.9915
GOTERM_BP_DIRECT	GO:0001764~neuron migration	16	0.659794	0.0833641	ENSGALG00000003805, ENSGALG00000010713, ENSGALG00000016624, ENSGALG00000010485, ENSGALG00000012123, ENSGALG00000009320, ENSGALG00000008135, ENSGALG00000002278, ENSGALG00000012660, ENSGALG00000017056, ENSGALG00000007000, ENSGALG00000006726, ENSGALG00000013602, ENSGALG00000011319, ENSGALG00000027999, ENSGALG00000005834	1642	57	8994	1.53753	1	0.990614	79.9915
GOTERM_BP_DIRECT	GO:0016485~protein processing	12	0.494845	0.0846438	ENSGALG00000004212, ENSGALG00000016509, ENSGALG00000017180, ENSGALG00000012329, ENSGALG00000006298, ENSGALG00000006865, ENSGALG00000009147, ENSGALG00000000775, ENSGALG00000009320, ENSGALG00000008341, ENSGALG00000004295, ENSGALG00000007271	1642	39	8994	1.68537	1	0.990699	80.5016
GOTERM_BP_DIRECT	GO:0021766~hippocampus development	9	0.371134	0.0860448	ENSGALG00000013568, ENSGALG00000011762, ENSGALG00000012329, ENSGALG00000005396, ENSGALG00000010040, ENSGALG00000011680, ENSGALG00000002175, ENSGALG00000005834, ENSGALG00000008073	1642	26	8994	1.89605	1	0.990845	81.0459
GOTERM_MF_DIRECT	GO:0030159~receptor signaling complex scaffold activity	3	0.123711	0.0863598	ENSGALG00000027391, ENSGALG00000001772, ENSGALG00000007352	1545	3	8532	5.52233	1	0.959079	76.398
GOTERM_MF_DIRECT	GO:0005220~inositol 1,4,5-trisphosphate-sensitive calcium-release channel activity	3	0.123711	0.0863598	ENSGALG00000008294, ENSGALG00000014071, ENSGALG00000003149	1545	3	8532	5.52233	1	0.959079	76.398
GOTERM_MF_DIRECT	GO:0008432~JUN kinase binding	3	0.123711	0.0863598	ENSGALG00000001772, ENSGALG00000016171, ENSGALG00000007352	1545	3	8532	5.52233	1	0.959079	76.398
GOTERM_BP_DIRECT	GO:0030540~female genitalia development	3	0.123711	0.0876901	ENSGALG00000015472, ENSGALG00000001449, ENSGALG00000008250	1642	3	8994	5.47747	1	0.991109	81.6668
GOTERM_BP_DIRECT	GO:0070989~oxidative demethylation	3	0.123711	0.0876901	ENSGALG00000010485, ENSGALG00000001320, ENSGALG00000001325	1642	3	8994	5.47747	1	0.991109	81.6668
GOTERM_BP_DIRECT	GO:0061591~calcium activated galactosylceramide scrambling	3	0.123711	0.0876901	ENSGALG00000009638, ENSGALG00000013311, ENSGALG00000011614	1642	3	8994	5.47747	1	0.991109	81.6668
GOTERM_BP_DIRECT	GO:0007216~G-protein coupled glutamate receptor signaling pathway	3	0.123711	0.0876901	ENSGALG00000017238, ENSGALG00000003849, ENSGALG00000012297	1642	3	8994	5.47747	1	0.991109	81.6668
GOTERM_BP_DIRECT	GO:0022615~protein to membrane docking	3	0.123711	0.0876901	ENSGALG00000015304, ENSGALG00000002001, ENSGALG00000005902	1642	3	8994	5.47747	1	0.991109	81.6668
GOTERM_BP_DIRECT	GO:0021764~amygdala development	3	0.123711	0.0876901	ENSGALG00000011762, ENSGALG00000015305, ENSGALG00000005660	1642	3	8994	5.47747	1	0.991109	81.6668
GOTERM_BP_DIRECT	GO:0060244~negative regulation of cell proliferation involved in contact inhibition	3	0.123711	0.0876901	ENSGALG00000016933, ENSGALG00000000681, ENSGALG00000011099	1642	3	8994	5.47747	1	0.991109	81.6668
GOTERM_BP_DIRECT	GO:0061590~calcium activated phosphatidylcholine scrambling	3	0.123711	0.0876901	ENSGALG00000009638, ENSGALG00000013311, ENSGALG00000011614	1642	3	8994	5.47747	1	0.991109	81.6668
GOTERM_BP_DIRECT	GO:0006468~protein phosphorylation	21	0.865979	0.0895608	ENSGALG00000002130, ENSGALG00000006681, ENSGALG00000014094, ENSGALG00000016518, ENSGALG00000016210, ENSGALG00000009612, ENSGALG00000007396, ENSGALG00000016512, ENSGALG00000012865, ENSGALG00000004212, ENSGALG00000010564, ENSGALG00000015770, ENSGALG00000010504, ENSGALG00000015995, ENSGALG00000012036, ENSGALG00000003136, ENSGALG00000003085, ENSGALG00000006950, ENSGALG00000014913, ENSGALG00000011517,…	1642	81	8994	1.42008	1	0.991468	82.3494
GOTERM_BP_DIRECT	GO:0048666~neuron development	8	0.329897	0.090263	ENSGALG00000017200, ENSGALG00000008442, ENSGALG00000002155, ENSGALG00000009320, ENSGALG00000001768, ENSGALG00000009612, ENSGALG00000010706, ENSGALG00000017106	1642	22	8994	1.99181	1	0.991261	82.5993
GOTERM_MF_DIRECT	GO:0017112~Rab guanyl-nucleotide exchange factor activity	7	0.28866	0.0906037	ENSGALG00000016167, ENSGALG00000008415, ENSGALG00000005840, ENSGALG00000005716, ENSGALG00000007500, ENSGALG00000009503, ENSGALG00000005927	1545	18	8532	2.14757	1	0.961451	78.0909
GOTERM_BP_DIRECT	GO:0045665~negative regulation of neuron differentiation	11	0.453608	0.090678	ENSGALG00000012329, ENSGALG00000015770, ENSGALG00000028828, ENSGALG00000012123, ENSGALG00000008263, ENSGALG00000008848, ENSGALG00000014974, ENSGALG00000015305, ENSGALG00000004510, ENSGALG00000007184, ENSGALG00000006898	1642	35	8994	1.72149	1	0.990913	82.7455
GOTERM_BP_DIRECT	GO:0008344~adult locomotory behavior	11	0.453608	0.090678	ENSGALG00000010572, ENSGALG00000009270, ENSGALG00000015770, ENSGALG00000001482, ENSGALG00000027513, ENSGALG00000004852, ENSGALG00000011562, ENSGALG00000010379, ENSGALG00000000597, ENSGALG00000010131, ENSGALG00000005834	1642	35	8994	1.72149	1	0.990913	82.7455
GOTERM_BP_DIRECT	GO:0033138~positive regulation of peptidyl-serine phosphorylation	13	0.536082	0.0913419	ENSGALG00000005396, ENSGALG00000008442, ENSGALG00000016083, ENSGALG00000009348, ENSGALG00000012885, ENSGALG00000010379, ENSGALG00000012865, ENSGALG00000027299, ENSGALG00000010967, ENSGALG00000009900, ENSGALG00000000681, ENSGALG00000008934, ENSGALG00000006793	1642	44	8994	1.61834	1	0.990687	82.9769
GOTERM_BP_DIRECT	GO:0035024~negative regulation of Rho protein signal transduction	5	0.206186	0.0919241	ENSGALG00000005108, ENSGALG00000001037, ENSGALG00000004816, ENSGALG00000013715, ENSGALG00000017196	1642	10	8994	2.73873	1	0.99042	83.1774
GOTERM_BP_DIRECT	GO:1901215~negative regulation of neuron death	5	0.206186	0.0919241	ENSGALG00000023430, ENSGALG00000007161, ENSGALG00000000724, ENSGALG00000026776, ENSGALG00000005369	1642	10	8994	2.73873	1	0.99042	83.1774
GOTERM_MF_DIRECT	GO:0004435~phosphatidylinositol phospholipase C activity	6	0.247423	0.0922345	ENSGALG00000028043, ENSGALG00000005805, ENSGALG00000005198, ENSGALG00000011248, ENSGALG00000008907, ENSGALG00000013123	1545	14	8532	2.36671	1	0.959919	78.7106
GOTERM_MF_DIRECT	GO:0016887~ATPase activity	21	0.865979	0.0927714	ENSGALG00000005374, ENSGALG00000012856, ENSGALG00000016955, ENSGALG00000005517, ENSGALG00000015733, ENSGALG00000008725, ENSGALG00000013208, ENSGALG00000002175, ENSGALG00000016639, ENSGALG00000007841, ENSGALG00000012689, ENSGALG00000017180, ENSGALG00000003717, ENSGALG00000008095, ENSGALG00000011330, ENSGALG00000006988, ENSGALG00000008553, ENSGALG00000001111, ENSGALG00000000181, ENSGALG00000013268,…	1545	82	8532	1.41426	1	0.956774	78.911
GOTERM_BP_DIRECT	GO:0045893~positive regulation of transcription, DNA-templated	43	1.7732	0.0930241	ENSGALG00000016680, ENSGALG00000016662, ENSGALG00000008167, ENSGALG00000008433, ENSGALG00000010276, ENSGALG00000019438, ENSGALG00000008249, ENSGALG00000006445, ENSGALG00000008848, ENSGALG00000011801, ENSGALG00000013049, ENSGALG00000012986, ENSGALG00000006726, ENSGALG00000011657, ENSGALG00000012848, ENSGALG00000014508, ENSGALG00000011137, ENSGALG00000003136, ENSGALG00000006688, ENSGALG00000011630,…	1642	189	8994	1.2462	1	0.990416	83.5501
GOTERM_MF_DIRECT	GO:0003682~chromatin binding	47	1.93814	0.0946444	ENSGALG00000016662, ENSGALG00000006014, ENSGALG00000012329, ENSGALG00000005909, ENSGALG00000005295, ENSGALG00000012123, ENSGALG00000019438, ENSGALG00000008249, ENSGALG00000010924, ENSGALG00000012449, ENSGALG00000004029, ENSGALG00000004947, ENSGALG00000000840, ENSGALG00000002514, ENSGALG00000006726, ENSGALG00000012363, ENSGALG00000011630, ENSGALG00000000983, ENSGALG00000005352, ENSGALG00000012207,…	1545	211	8532	1.23009	1	0.955681	79.5964
GOTERM_BP_DIRECT	GO:0051056~regulation of small GTPase mediated signal transduction	6	0.247423	0.0949161	ENSGALG00000005646, ENSGALG00000009381, ENSGALG00000009293, ENSGALG00000011025, ENSGALG00000001420, ENSGALG00000008410	1642	14	8994	2.34749	1	0.990799	84.173
GOTERM_BP_DIRECT	GO:0030336~negative regulation of cell migration	14	0.57732	0.0970603	ENSGALG00000016933, ENSGALG00000004816, ENSGALG00000003634, ENSGALG00000012885, ENSGALG00000021869, ENSGALG00000006382, ENSGALG00000001262, ENSGALG00000008253, ENSGALG00000014783, ENSGALG00000007527, ENSGALG00000015511, ENSGALG00000001037, ENSGALG00000013715, ENSGALG00000005660	1642	49	8994	1.56499	1	0.991274	84.8519
KEGG enrichment
Category	Term	Count	%	PValue	Genes	List Total	Pop Hits	Pop Total	Fold Enrichment	Bonferroni	Benjamini	FDR
KEGG_PATHWAY	gga04270:Vascular smooth muscle contraction	36	1.48454	5.93076e-06	ENSGALG00000007779, ENSGALG00000006014, ENSGALG00000027617, ENSGALG00000019233, ENSGALG00000010325, ENSGALG00000008907, ENSGALG00000003837, ENSGALG00000020989, ENSGALG00000011699, ENSGALG00000005076, ENSGALG00000020458, ENSGALG00000013022, ENSGALG00000016298, ENSGALG00000005332, ENSGALG00000002632, ENSGALG00000013060, ENSGALG00000004980, ENSGALG00000012281, ENSGALG00000027575, ENSGALG00000010000,…	722	101	4353	2.14898	0.000895147	0.000895147	0.00709022
KEGG_PATHWAY	gga04114:Oocyte meiosis	30	1.23711	0.000106389	ENSGALG00000007779, ENSGALG00000005088, ENSGALG00000010273, ENSGALG00000003837, ENSGALG00000008527, ENSGALG00000011260, ENSGALG00000011699, ENSGALG00000016298, ENSGALG00000012036, ENSGALG00000009971, ENSGALG00000017358, ENSGALG00000013060, ENSGALG00000016406, ENSGALG00000012280, ENSGALG00000010026, ENSGALG00000012433, ENSGALG00000014071, ENSGALG00000001501, ENSGALG00000006912, ENSGALG00000014516,…	722	88	4353	2.05537	0.0159372	0.00800061	0.127118
KEGG_PATHWAY	gga04540:Gap junction	27	1.1134	0.000245917	ENSGALG00000007779, ENSGALG00000006014, ENSGALG00000013045, ENSGALG00000026802, ENSGALG00000003837, ENSGALG00000008907, ENSGALG00000017238, ENSGALG00000011699, ENSGALG00000005076, ENSGALG00000016298, ENSGALG00000012363, ENSGALG00000012821, ENSGALG00000013060, ENSGALG00000012297, ENSGALG00000003805, ENSGALG00000002719, ENSGALG00000012433, ENSGALG00000007930, ENSGALG00000014071, ENSGALG00000001501,…	722	79	4353	2.06057	0.0364569	0.012303	0.293608
KEGG_PATHWAY	gga04261:Adrenergic signaling in cardiomyocytes	34	1.40206	0.00151836	ENSGALG00000007779, ENSGALG00000002764, ENSGALG00000007082, ENSGALG00000005088, ENSGALG00000008591, ENSGALG00000001208, ENSGALG00000010273, ENSGALG00000008527, ENSGALG00000003837, ENSGALG00000008907, ENSGALG00000011260, ENSGALG00000011699, ENSGALG00000013022, ENSGALG00000005400, ENSGALG00000016298, ENSGALG00000012036, ENSGALG00000011137, ENSGALG00000005448, ENSGALG00000005332, ENSGALG00000008934,…	722	120	4353	1.70824	0.205027	0.0557476	1.80024
KEGG_PATHWAY	gga04912:GnRH signaling pathway	23	0.948454	0.00543423	ENSGALG00000012433, ENSGALG00000007779, ENSGALG00000015824, ENSGALG00000005088, ENSGALG00000014071, ENSGALG00000001501, ENSGALG00000008875, ENSGALG00000000730, ENSGALG00000007687, ENSGALG00000008907, ENSGALG00000003837, ENSGALG00000020003, ENSGALG00000008294, ENSGALG00000011699, ENSGALG00000020458, ENSGALG00000013022, ENSGALG00000012363, ENSGALG00000016298, ENSGALG00000012036, ENSGALG00000005332,…	722	77	4353	1.8009	0.560803	0.151734	6.30689
KEGG_PATHWAY	gga04070:Phosphatidylinositol signaling system	26	1.07216	0.00552713	ENSGALG00000006014, ENSGALG00000010493, ENSGALG00000028043, ENSGALG00000010827, ENSGALG00000027545, ENSGALG00000003920, ENSGALG00000014071, ENSGALG00000001386, ENSGALG00000008875, ENSGALG00000003634, ENSGALG00000002710, ENSGALG00000008907, ENSGALG00000016959, ENSGALG00000006121, ENSGALG00000009096, ENSGALG00000008294, ENSGALG00000017200, ENSGALG00000005805, ENSGALG00000002510, ENSGALG00000008934,…	722	91	4353	1.7226	0.566954	0.130194	6.41146
KEGG_PATHWAY	gga04020:Calcium signaling pathway	40	1.64948	0.00704724	ENSGALG00000007779, ENSGALG00000003833, ENSGALG00000006014, ENSGALG00000028043, ENSGALG00000014355, ENSGALG00000009705, ENSGALG00000005088, ENSGALG00000016518, ENSGALG00000008885, ENSGALG00000005215, ENSGALG00000012224, ENSGALG00000008907, ENSGALG00000003837, ENSGALG00000017238, ENSGALG00000013022, ENSGALG00000007278, ENSGALG00000005805, ENSGALG00000012363, ENSGALG00000016298, ENSGALG00000014508,…	722	161	4353	1.49791	0.656271	0.14149	8.1075
KEGG_PATHWAY	gga04916:Melanogenesis	25	1.03093	0.00830946	ENSGALG00000012433, ENSGALG00000007779, ENSGALG00000001079, ENSGALG00000006014, ENSGALG00000008433, ENSGALG00000016069, ENSGALG00000005396, ENSGALG00000005088, ENSGALG00000001501, ENSGALG00000008883, ENSGALG00000008875, ENSGALG00000007687, ENSGALG00000008907, ENSGALG00000003837, ENSGALG00000001097, ENSGALG00000008414, ENSGALG00000011699, ENSGALG00000005401, ENSGALG00000001600, ENSGALG00000011992,…	722	89	4353	1.69356	0.716338	0.14572	9.49435
KEGG_PATHWAY	gga04510:Focal adhesion	44	1.81443	0.00936231	ENSGALG00000008747, ENSGALG00000006014, ENSGALG00000015001, ENSGALG00000007905, ENSGALG00000009781, ENSGALG00000003634, ENSGALG00000010325, ENSGALG00000006426, ENSGALG00000002552, ENSGALG00000006802, ENSGALG00000003115, ENSGALG00000009992, ENSGALG00000008266, ENSGALG00000012363, ENSGALG00000016171, ENSGALG00000008934, ENSGALG00000003712, ENSGALG00000001381, ENSGALG00000010709, ENSGALG00000011778,…	722	184	4353	1.44174	0.758375	0.145995	10.6364
KEGG_PATHWAY	gga04012:ErbB signaling pathway	22	0.907216	0.0114686	ENSGALG00000006014, ENSGALG00000005088, ENSGALG00000006390, ENSGALG00000001501, ENSGALG00000028608, ENSGALG00000003339, ENSGALG00000006426, ENSGALG00000012865, ENSGALG00000007687, ENSGALG00000015351, ENSGALG00000003126, ENSGALG00000012363, ENSGALG00000012036, ENSGALG00000016171, ENSGALG00000000681, ENSGALG00000008934, ENSGALG00000002327, ENSGALG00000001001, ENSGALG00000010709, ENSGALG00000002952,…	722	77	4353	1.7226	0.82479	0.159852	12.8818
KEGG_PATHWAY	gga04512:ECM-receptor interaction	21	0.865979	0.0127646	ENSGALG00000008747, ENSGALG00000004627, ENSGALG00000006859, ENSGALG00000015001, ENSGALG00000006864, ENSGALG00000012238, ENSGALG00000014014, ENSGALG00000007917, ENSGALG00000006126, ENSGALG00000007905, ENSGALG00000003283, ENSGALG00000002552, ENSGALG00000006802, ENSGALG00000003115, ENSGALG00000008266, ENSGALG00000007849, ENSGALG00000011778, ENSGALG00000016841, ENSGALG00000015056, ENSGALG00000005022,…	722	73	4353	1.73439	0.856275	0.161676	14.2374
KEGG_PATHWAY	gga04144:Endocytosis	52	2.14433	0.0208639	ENSGALG00000013899, ENSGALG00000006799, ENSGALG00000015304, ENSGALG00000005902, ENSGALG00000004512, ENSGALG00000015351, ENSGALG00000005139, ENSGALG00000009403, ENSGALG00000012363, ENSGALG00000005637, ENSGALG00000003566, ENSGALG00000004852, ENSGALG00000021601, ENSGALG00000004375, ENSGALG00000024372, ENSGALG00000007149, ENSGALG00000013594, ENSGALG00000004529, ENSGALG00000012760, ENSGALG00000015645,…	722	235	4353	1.3341	0.958571	0.233035	22.2813
KEGG_PATHWAY	gga04520:Adherens junction	19	0.783505	0.0248722	ENSGALG00000002859, ENSGALG00000007870, ENSGALG00000001501, ENSGALG00000000608, ENSGALG00000008883, ENSGALG00000005788, ENSGALG00000002845, ENSGALG00000006382, ENSGALG00000011329, ENSGALG00000002447, ENSGALG00000012363, ENSGALG00000011992, ENSGALG00000017103, ENSGALG00000001381, ENSGALG00000007762, ENSGALG00000027853, ENSGALG00000010049, ENSGALG00000013902, ENSGALG00000007125	722	68	4353	1.6846	0.977701	0.253644	26.0009
KEGG_PATHWAY	gga00230:Purine metabolism	35	1.4433	0.0273729	ENSGALG00000007779, ENSGALG00000015230, ENSGALG00000008885, ENSGALG00000009005, ENSGALG00000012192, ENSGALG00000008701, ENSGALG00000012224, ENSGALG00000003837, ENSGALG00000011982, ENSGALG00000011947, ENSGALG00000004947, ENSGALG00000005057, ENSGALG00000011699, ENSGALG00000005076, ENSGALG00000007172, ENSGALG00000016298, ENSGALG00000012655, ENSGALG00000016278, ENSGALG00000013728, ENSGALG00000013143,…	722	149	4353	1.41623	0.984868	0.258702	28.2381
KEGG_PATHWAY	gga04530:Tight junction	29	1.19588	0.0398175	ENSGALG00000006014, ENSGALG00000000779, ENSGALG00000008477, ENSGALG00000000748, ENSGALG00000003634, ENSGALG00000010385, ENSGALG00000010273, ENSGALG00000014004, ENSGALG00000002845, ENSGALG00000028134, ENSGALG00000011329, ENSGALG00000026748, ENSGALG00000010709, ENSGALG00000001381, ENSGALG00000027853, ENSGALG00000010000, ENSGALG00000014638, ENSGALG00000013594, ENSGALG00000010471, ENSGALG00000028102,…	722	122	4353	1.43314	0.997835	0.335704	38.4777
KEGG_PATHWAY	gga04150:mTOR signaling pathway	14	0.57732	0.0511075	ENSGALG00000005646, ENSGALG00000006014, ENSGALG00000023857, ENSGALG00000002403, ENSGALG00000001501, ENSGALG00000003634, ENSGALG00000003339, ENSGALG00000012865, ENSGALG00000028828, ENSGALG00000008934, ENSGALG00000010709, ENSGALG00000005198, ENSGALG00000016406, ENSGALG00000003428	722	49	4353	1.7226	0.999637	0.390483	46.5902
KEGG_PATHWAY	gga04145:Phagosome	29	1.19588	0.0524745	ENSGALG00000000775, ENSGALG00000013045, ENSGALG00000026802, ENSGALG00000005902, ENSGALG00000017180, ENSGALG00000007485, ENSGALG00000014910, ENSGALG00000009570, ENSGALG00000003359, ENSGALG00000028357, ENSGALG00000012821, ENSGALG00000001381, ENSGALG00000000181, ENSGALG00000011778, ENSGALG00000003256, ENSGALG00000024372, ENSGALG00000008638, ENSGALG00000016446, ENSGALG00000015012, ENSGALG00000013056,…	722	125	4353	1.39875	0.999708	0.380456	47.5029
KEGG_PATHWAY	gga04310:Wnt signaling pathway	27	1.1134	0.0773012	ENSGALG00000001079, ENSGALG00000006014, ENSGALG00000008433, ENSGALG00000016069, ENSGALG00000005396, ENSGALG00000005088, ENSGALG00000008883, ENSGALG00000008907, ENSGALG00000027391, ENSGALG00000001097, ENSGALG00000008414, ENSGALG00000005401, ENSGALG00000012036, ENSGALG00000012017, ENSGALG00000012280, ENSGALG00000002859, ENSGALG00000003767, ENSGALG00000009320, ENSGALG00000008875, ENSGALG00000013366,…	722	119	4353	1.36794	0.999995	0.490796	61.7811
KEGG_PATHWAY	gga00562:Inositol phosphate metabolism	17	0.701031	0.0858492	ENSGALG00000028043, ENSGALG00000010827, ENSGALG00000010493, ENSGALG00000027545, ENSGALG00000003920, ENSGALG00000001386, ENSGALG00000008875, ENSGALG00000003634, ENSGALG00000002710, ENSGALG00000008907, ENSGALG00000006121, ENSGALG00000009096, ENSGALG00000017200, ENSGALG00000005805, ENSGALG00000008934, ENSGALG00000013117, ENSGALG00000013123	722	68	4353	1.50727	0.999999	0.510002	65.8057
KEGG_PATHWAY	gga03015:mRNA surveillance pathway	17	0.701031	0.0954482	ENSGALG00000010026, ENSGALG00000013962, ENSGALG00000003220, ENSGALG00000010471, ENSGALG00000001208, ENSGALG00000002262, ENSGALG00000010273, ENSGALG00000015787, ENSGALG00000009011, ENSGALG00000003800, ENSGALG00000008527, ENSGALG00000013889, ENSGALG00000011260, ENSGALG00000006829, ENSGALG00000016702, ENSGALG00000001489, ENSGALG00000002043	722	69	4353	1.48543	1	0.531108	69.8599

## Sheet: S5 Table
Gene	Chormosome	Gene_beg	Gene_end	MIN_copy number	MAX_copy number	CNVR_beg	CNVR_end	Gene_name	Category	Gene_Description	GeneFamilyID	GeneFamilyDescription	interproscanID	interproscanDescription
ENSGALG00000028706	chr25	938931	940050	5	13	905002	955508	F-KER	Feather keratin	Gallus gallus feather keratin I (F-KER), mRNA. [Source:RefSeq mRNA;Acc:NM_001081702]	ENSFM00670001237007	FEATHER KERATIN F KER	IPR003461	Keratin
ENSGALG00000028211	chr25	928748	929859	4	25	905002	955508		Feather keratin	Gallus gallus feather keratin 1-like (LOC100859427), mRNA. [Source:RefSeq mRNA;Acc:NM_001277807]	ENSFM00670001237007	FEATHER KERATIN F KER	IPR003461	Keratin
ENSGALG00000026987	chr25	932301	933146	4	22	905002	955508		Feather keratin	Gallus gallus feather keratin 1-like (LOC426914), mRNA. [Source:RefSeq mRNA;Acc:NM_001277964]	ENSFM00670001237007	FEATHER KERATIN F KER	IPR003461	Keratin
ENSGALG00000025985	chr25	921418	922143	12	35	905002	955508		Feather keratin	Gallus gallus feather keratin 3-like (LOC100859191), mRNA. [Source:RefSeq mRNA;Acc:NM_001277808]	ENSFM00670001237007	FEATHER KERATIN F KER	IPR003461	Keratin
ENSGALG00000028192	chr25	936060	936356	3	13	905002	955508		Feather keratin	feather keratin 3 [Source:RefSeq peptide;Acc:NP_001095201]	ENSFM00670001237007	FEATHER KERATIN F KER	IPR003461	Keratin
ENSGALG00000024141	chr25	944017	944771	4	11	905002	955508		Feather keratin	Gallus gallus feather keratin 1-like (LOC431325), mRNA. [Source:RefSeq mRNA;Acc:NM_001277801]	ENSFM00670001237007	FEATHER KERATIN F KER	IPR003461	Keratin
ENSGALG00000028843	chr25	950252	951341	5	14	905002	955508		Feather keratin	Gallus gallus feather keratin 1-like (LOC426913), mRNA. [Source:RefSeq mRNA;Acc:NM_001277798]	ENSFM00670001237007	FEATHER KERATIN F KER	IPR003461	Keratin
ENSGALG00000027167	chr25	908919	910020	3	8	905002	955508		Feather keratin	Gallus gallus feather keratin 1-like (LOC100858797), mRNA. [Source:RefSeq mRNA;Acc:NM_001277960]	ENSFM00670001237007	FEATHER KERATIN F KER	IPR003461	Keratin
ENSGALG00000026754	chr25	885230	907160	3	6	905002	955508		Feather keratin	Gallus gallus feather keratin 1-like (LOC769139), mRNA. [Source:RefSeq mRNA;Acc:NM_001277931]	ENSFM00670001237007	FEATHER KERATIN F KER	IPR003461	Keratin
ENSGALG00000027640	chr25	927670	927966	10	30	905002	955508		Feather keratin	feather keratin 3-like [Source:RefSeq peptide;Acc:NP_001264892]	ENSFM00670001237007	FEATHER KERATIN F KER	IPR003461	Keratin
ENSGALG00000025900	chr25	947082	947378	4	11	905002	955508		Feather keratin	feather keratin 4 [Source:RefSeq peptide;Acc:NP_001095202]	ENSFM00670001237007	FEATHER KERATIN F KER	IPR003461	Keratin
ENSGALG00000026348	chr27	765441	766103	26	90	437975	877259	FK21	Feather keratin	Gallus gallus feather keratin 21 (FK21), mRNA. [Source:RefSeq mRNA;Acc:NM_001277772]	ENSFM00670001236030	FEATHER KERATIN F KER	IPR003461	Keratin
ENSGALG00000026504	chr27	645858	646611	18	61	437975	877259	FK27	Feather keratin	Uncharacterized protein [Source:UniProtKB/TrEMBL;Acc:E1C446]	ENSFM00670001236030	FEATHER KERATIN F KER	IPR003461	Keratin
ENSGALG00000025871	chr27	798157	798462	15	48	437975	877259	FK21	Feather keratin	Uncharacterized protein [Source:UniProtKB/TrEMBL;Acc:E1C3N8]	ENSFM00670001236030	FEATHER KERATIN F KER	IPR003461	Keratin
ENSGALG00000026447	chr27	628521	628826	13	45	437975	877259	FK21	Feather keratin	Uncharacterized protein [Source:UniProtKB/TrEMBL;Acc:E1C3N8]	ENSFM00670001236030	FEATHER KERATIN F KER	IPR003461	Keratin
ENSGALG00000027962	chr27	715618	719332	5	67	437975	877259	FK21	Feather keratin	Uncharacterized protein [Source:UniProtKB/TrEMBL;Acc:E1C3N8]	ENSFM00670001236030	FEATHER KERATIN F KER	IPR003461	Keratin
ENSGALG00000028313	chr27	767379	767684	16	57	437975	877259	FK21	Feather keratin	Uncharacterized protein [Source:UniProtKB/TrEMBL;Acc:E1C3N8]	ENSFM00670001236030	FEATHER KERATIN F KER	IPR003461	Keratin
ENSGALG00000026495	chr27	547809	548450	19	65	437975	877259	FK21	Feather keratin	Uncharacterized protein [Source:UniProtKB/TrEMBL;Acc:E1C3N8]	ENSFM00670001236030	FEATHER KERATIN F KER	IPR003461	Keratin
ENSGALG00000026219	chr27	772968	773724	20	69	437975	877259		Feather keratin	Gallus gallus feather keratin Cos1-1/Cos1-3/Cos2-1-like (LOC770639), mRNA. [Source:RefSeq mRNA;Acc:NM_001277770]	ENSFM00670001236030	FEATHER KERATIN F KER	IPR003461	Keratin
ENSGALG00000026205	chr27	862246	863491	4	45	437975	877259		Feather keratin	Uncharacterized protein [Source:UniProtKB/TrEMBL;Acc:R4GGU2]	ENSFM00670001236030	FEATHER KERATIN F KER	IPR003461	Keratin
ENSGALG00000028066	chr27	611943	612248	9	66	437975	877259	FK21	Feather keratin	Uncharacterized protein [Source:UniProtKB/TrEMBL;Acc:E1C3N8]	ENSFM00670001236030	FEATHER KERATIN F KER	IPR003461	Keratin
ENSGALG00000027819	chr27	856721	857026	15	50	437975	877259		Feather keratin	feather keratin Cos1-1/Cos1-3/Cos2-1-like [Source:RefSeq peptide;Acc:NP_001264700]	ENSFM00670001236030	FEATHER KERATIN F KER	IPR003461	Keratin
ENSGALG00000027303	chr27	828816	829115	3	23	437975	877259		Feather keratin	Uncharacterized protein [Source:UniProtKB/TrEMBL;Acc:R4GMH2]	ENSFM00670001236030	FEATHER KERATIN F KER	IPR003461	Keratin
ENSGALG00000026660	chr27	713353	714073	3	49	437975	877259		Feather keratin	Uncharacterized protein [Source:UniProtKB/TrEMBL;Acc:R4GKP4]	ENSFM00670001236030	FEATHER KERATIN F KER	IPR003461	Keratin
ENSGALG00000026481	chr27	740845	747286	8	68	437975	877259	FK27	Feather keratin	Gallus gallus feather keratin 27 (FK27), mRNA. [Source:RefSeq mRNA;Acc:NM_001277773]	ENSFM00670001236030	FEATHER KERATIN F KER	IPR003461	Keratin
ENSGALG00000025813	chr27	582718	583138	26	79	437975	877259		Feather keratin	Uncharacterized protein [Source:UniProtKB/TrEMBL;Acc:R4GKB6]	ENSFM00670001236030	FEATHER KERATIN F KER	IPR003461	Keratin
ENSGALG00000028842	chr27	1045863	1046177	14	50	893259	1050064		Feather keratin	Uncharacterized protein [Source:UniProtKB/TrEMBL;Acc:E1C602]	ENSFM00670001236030	FEATHER KERATIN F KER	IPR003461	Keratin
ENSGALG00000027214	chr27	1048838	1049152	10	32	893259	1050064		Feather keratin	Uncharacterized protein [Source:UniProtKB/TrEMBL;Acc:R4GFY8]	ENSFM00670001236030	FEATHER KERATIN F KER	IPR003461	Keratin
ENSGALG00000028220	chr27	916441	916755	9	22	893259	1050064		Feather keratin	Uncharacterized protein [Source:UniProtKB/TrEMBL;Acc:E1C3X3]	ENSFM00670001236030	FEATHER KERATIN F KER	IPR003461	Keratin
ENSGALG00000027009	chr27	1041688	1042002	15	55	893259	1050064		Feather keratin	Uncharacterized protein [Source:UniProtKB/TrEMBL;Acc:E1C602]	ENSFM00670001236030	FEATHER KERATIN F KER	IPR003461	Keratin
ENSGALG00000022964	chr1	75682822	75711590	3	7	75695353	75731644		Immune: alpha-2-macroglobulin	Uncharacterized protein [Source:UniProtKB/TrEMBL;Acc:E1C544]	ENSFM00730001521356	PRECURSOR	IPR019565	Alpha-2-macroglobulin, thiol-ester bond-forming
ENSGALG00000011926	chr1	75713572	75750893	3	8	75695353	75731644		Immune: alpha-2-macroglobulin	Uncharacterized protein [Source:UniProtKB/TrEMBL;Acc:F1NF29]	ENSFM00730001521356	PRECURSOR	IPR019565	Alpha-2-macroglobulin, thiol-ester bond-forming
ENSGALG00000019602	chr2	49671235	49698316	3	34	49679436	49731156		Immune: T-cell receptor	Uncharacterized protein [Source:UniProtKB/TrEMBL;Acc:E1C5N5]	ENSFM00730001525557	UNKNOWN	IPR013106	Immunoglobulin V-set domain
ENSGALG00000027010	chr27	253675	255822	6	25	201508	372441		Immune: T-cell receptor	Uncharacterized protein [Source:UniProtKB/TrEMBL;Acc:R4GF78]	ENSFM00710001442953	UNKNOWN	IPR013106	Immunoglobulin V-set domain
ENSGALG00000024255	chr27	262514	283865	3	57	201508	372441		Immune: T-cell receptor	Uncharacterized protein [Source:UniProtKB/TrEMBL;Acc:F1NAH5]	ENSFM00710001442953	UNKNOWN	IPR013106	Immunoglobulin V-set domain
ENSGALG00000024254	chr27	216789	351105	3	57	201508	372441		Immune: T-cell receptor	Uncharacterized protein [Source:UniProtKB/TrEMBL;Acc:F1NRV4]	ENSFM00710001442953	UNKNOWN	IPR013106	Immunoglobulin V-set domain
ENSGALG00000024248	chr27	195260	395207	3	57	379576	435975		Immune: T-cell receptor	Uncharacterized protein [Source:UniProtKB/TrEMBL;Acc:F1NSG2]	ENSFM00710001442953	UNKNOWN	IPR013106	Immunoglobulin V-set domain
ENSGALG00000011411	chr27	422970	423344	6	12	379576	435975		Immune: T-cell receptor	Uncharacterized protein [Source:UniProtKB/TrEMBL;Acc:F1P4B7]	ENSFM00710001442953	UNKNOWN	IPR013106	Immunoglobulin V-set domain
ENSGALG00000018528	chr27	428858	429692	3	8	379576	435975		Immune: T-cell receptor	Uncharacterized protein [Source:UniProtKB/TrEMBL;Acc:F1N969]	ENSFM00710001442953	UNKNOWN	IPR013106	Immunoglobulin V-set domain
ENSGALG00000013327	chr27	426766	427752	4	15	379576	435975		Immune: T-cell receptor	Uncharacterized protein [Source:UniProtKB/TrEMBL;Acc:E1BVM6]	ENSFM00670001261982	UNKNOWN	IPR013106	Immunoglobulin V-set domain
ENSGALG00000014362	chr1	76121660	76143611	5	37	76131613	76144786	CD86	Immune：T cell surface glycoprotein	Gallus gallus CD86 molecule (CD86), mRNA. [Source:RefSeq mRNA;Acc:NM_001037839]	ENSFM00500000291092	CD86 {ECO: |EMBL: 1}CD86 {ECO: |EMBL: 1} PRECURSOR {ECO: |EMBL: 1}	IPR013162	CD80-like, immunoglobulin C2-set
ENSGALG00000015900	chr4	85237877	85275284	3	20	85224159	85442028		Immune：T cell surface glycoprotein	Uncharacterized protein [Source:UniProtKB/TrEMBL;Acc:F1NX38]	ENSFM00250000004957	CD8 ALPHA {ECO: |EMBL: 1}	IPR013106	Immunoglobulin V-set domain
ENSGALG00000015816	chr4	85223253	85302649	3	36	85224159	85442028	CD8A	Immune：T cell surface glycoprotein	Gallus gallus CD8a molecule (CD8A), mRNA. [Source:RefSeq mRNA;Acc:NM_205235]	ENSFM00250000004957	CD8 ALPHA {ECO: |EMBL: 1}	IPR013106	Immunoglobulin V-set domain
ENSGALG00000029065	chr4	85276393	85286164	3	36	85224159	85442028		Immune：T cell surface glycoprotein	Uncharacterized protein [Source:UniProtKB/TrEMBL;Acc:R4GFT0]	ENSFM00710001444725	UNKNOWN	IPR013106	Immunoglobulin V-set domain
ENSGALG00000028338	chr4	85238877	85250276	3	20	85224159	85442028		Immune：T cell surface glycoprotein	Uncharacterized protein [Source:UniProtKB/TrEMBL;Acc:R4GHL1]	ENSFM00710001444725	UNKNOWN	IPR013106	Immunoglobulin V-set domain
ENSGALG00000013492	chr4	85268815	85269673	3	11	85224159	85442028		Immune：T cell surface glycoprotein	Uncharacterized protein [Source:UniProtKB/TrEMBL;Acc:H9L059]	ENSFM00710001444725	UNKNOWN	IPR013106	Immunoglobulin V-set domain
ENSGALG00000022787	chr1	110695197	110700053	11	105	110688039	110705379		Maestro heat-like repeat family	Uncharacterized protein [Source:UniProtKB/TrEMBL;Acc:E1C841]	ENSFM00500000281203	HEAT REPEAT CONTAINING 7A {ECO: |EMBL: 1}	IPR016024	Armadillo-type fold
ENSGALG00000028184	chr1	113133870	113141038	14	155	113119615	113155760		Maestro heat-like repeat family	-	ENSFM00500000281203	HEAT REPEAT CONTAINING 7A {ECO: |EMBL: 1}	IPR016024	Armadillo-type fold
ENSGALG00000022792	chr1	113688262	113692283	27	150	113681662	113691717		Maestro heat-like repeat family	Uncharacterized protein [Source:UniProtKB/TrEMBL;Acc:F1NRN8]	ENSFM00500000281203	HEAT REPEAT CONTAINING 7A {ECO: |EMBL: 1}	IPR016024	Armadillo-type fold
ENSGALG00000016290	chr1	116327688	116331906	16	122	116314357	116339357		Maestro heat-like repeat family	Uncharacterized protein [Source:UniProtKB/TrEMBL;Acc:F1NHP3]	ENSFM00500000281203	HEAT REPEAT CONTAINING 7A {ECO: |EMBL: 1}	IPR016024	Armadillo-type fold
ENSGALG00000026840	chr1	121027874	121033370	20	130	121014905	121043905		Maestro heat-like repeat family	Uncharacterized protein [Source:UniProtKB/TrEMBL;Acc:F1NB50]	ENSFM00500000281203	HEAT REPEAT CONTAINING 7A {ECO: |EMBL: 1}	IPR016024	Armadillo-type fold
ENSGALG00000028703	chr1	122103149	122107413	4	68	122096569	122210517		Maestro heat-like repeat family	Uncharacterized protein [Source:UniProtKB/TrEMBL;Acc:R4GI83]	ENSFM00500000281203	HEAT REPEAT CONTAINING 7A {ECO: |EMBL: 1}	-	-
ENSGALG00000027180	chr1	123814778	123821938	6	118	123799112	123825176		Maestro heat-like repeat family	Uncharacterized protein [Source:UniProtKB/TrEMBL;Acc:R4GHK6]	ENSFM00500000281203	HEAT REPEAT CONTAINING 7A {ECO: |EMBL: 1}	IPR016024	Armadillo-type fold
ENSGALG00000022791	chr1	171267169	171271465	10	72	171259185	171283185		Maestro heat-like repeat family	Uncharacterized protein [Source:UniProtKB/TrEMBL;Acc:F1NIY6]	ENSFM00500000281203	HEAT REPEAT CONTAINING 7A {ECO: |EMBL: 1}	IPR016024	Armadillo-type fold
ENSGALG00000028453	chr1	72450875	72476524	30	67	72451152	72460152	MRPS35	mitochondrial ribosomal protein	28S ribosomal protein S35, mitochondrial isoform 2 [Source:RefSeq peptide;Acc:NP_001265021]	ENSFM00250000004577	28S RIBOSOMAL S35 MITOCHONDRIAL PRECURSOR MRP S35 S35MT 28S RIBOSOMAL S28 MITOCHONDRIAL MRP S28 S28MT	IPR019349	Ribosomal protein S24/S35, mitochondrial, conserved domain
ENSGALG00000016731	chr3	110398595	110404077	6	214	110384839	110442760		mitochondrial ribosomal protein	Uncharacterized protein [Source:UniProtKB/TrEMBL;Acc:F1NEW6]	ENSFM00250000006895	39S RIBOSOMAL L19 MITOCHONDRIAL PRECURSOR L19MT MRP L19	IPR008991	Translation protein SH3-like domain
ENSGALG00000027323	chr18	350875	373463	3	11	354829	401829		Myosin, skeletal muscle	Uncharacterized protein [Source:UniProtKB/TrEMBL;Acc:R4GIG1]	ENSFM00250000000024	MYOSIN MYOSIN HEAVY CHAIN MYOSIN HEAVY CHAIN MUSCLE	IPR027417	P-loop containing nucleoside triphosphate hydrolase
ENSGALG00000028102	chr18	381895	399588	3	12	354829	401829		Myosin, skeletal muscle	Uncharacterized protein [Source:UniProtKB/TrEMBL;Acc:F1P3X4]	ENSFM00250000000024	MYOSIN MYOSIN HEAVY CHAIN MYOSIN HEAVY CHAIN MUSCLE	IPR027417	P-loop containing nucleoside triphosphate hydrolase
ENSGALG00000026748	chr18	433290	451636	3	14	427885	497885	MYH1A	Myosin, skeletal muscle	Gallus gallus myosin, heavy chain 1A, skeletal muscle (similar to human myosin, heavy chain 1, skeletal muscle, adult) (MYH1A), mRNA. [Source:RefSeq mRNA;Acc:NM_001013396]	ENSFM00250000000024	MYOSIN MYOSIN HEAVY CHAIN MYOSIN HEAVY CHAIN MUSCLE	IPR027417	P-loop containing nucleoside triphosphate hydrolase
ENSGALG00000028896	chr18	538724	561401	3	11	532885	563885	MYH1E	Myosin, skeletal muscle	Gallus gallus myosin, heavy chain 6, cardiac muscle, alpha (MYH6), mRNA. [Source:RefSeq mRNA;Acc:NM_001013397]	ENSFM00250000000024	MYOSIN MYOSIN HEAVY CHAIN MYOSIN HEAVY CHAIN MUSCLE	IPR027417	P-loop containing nucleoside triphosphate hydrolase
ENSGALG00000028612	chr18	619454	638720	3	14	577885	643885		Myosin, skeletal muscle	Uncharacterized protein [Source:UniProtKB/TrEMBL;Acc:F1P3X1]	ENSFM00250000000024	MYOSIN MYOSIN HEAVY CHAIN MYOSIN HEAVY CHAIN MUSCLE	IPR027417	P-loop containing nucleoside triphosphate hydrolase
ENSGALG00000028134	chr18	473713	638720	3	16	577885	643885	MYH1B	Myosin, skeletal muscle	Gallus gallus myosin, heavy chain 1B, skeletal muscle (similar to human myosin, heavy chain 1, skeletal muscle, adult) (MYH1B), mRNA. [Source:RefSeq mRNA;Acc:NM_204228]	ENSFM00250000000024	MYOSIN MYOSIN HEAVY CHAIN MYOSIN HEAVY CHAIN MUSCLE	IPR027417	P-loop containing nucleoside triphosphate hydrolase
ENSGALG00000027177	chr18	584154	601425	3	14	577885	643885	MYH1C	Myosin, skeletal muscle	Gallus gallus myosin, heavy chain 1C, skeletal muscle (similar to human myosin, heavy chain 1, skeletal muscle, adult) (MYH1C), mRNA. [Source:RefSeq mRNA;Acc:NM_001113709]	ENSFM00250000000024	MYOSIN MYOSIN HEAVY CHAIN MYOSIN HEAVY CHAIN MUSCLE	IPR027417	P-loop containing nucleoside triphosphate hydrolase
ENSGALG00000027858	chr2	31124412	31140668	5	19	31107832	31260092		Nucleoporin-like protein	Uncharacterized protein [Source:UniProtKB/TrEMBL;Acc:R4GKU2]	ENSFM00250000005665	NUCLEOPORIN 2	-	-
ENSGALG00000028414	chr2	31147804	31159807	23	138	31107832	31260092		Nucleoporin-like protein	Uncharacterized protein [Source:UniProtKB/TrEMBL;Acc:R4GFC0]	ENSFM00250000005665	NUCLEOPORIN 2	-	-
ENSGALG00000003796	chr2	31248093	31251699	5	175	31107832	31260092		Nucleoporin-like protein	Uncharacterized protein [Source:UniProtKB/TrEMBL;Acc:F1NE91]	ENSFM00250000005665	NUCLEOPORIN 2	-	-
ENSGALG00000026595	chr5	1046130	1047068	4	7	1024370	1058370	COR3	Olfactory receptor	Gallus gallus olfactory receptor, family 8, subfamily U, member 1 (OR8U1), mRNA. [Source:RefSeq mRNA;Acc:NM_001031176]	ENSFM00730001521066	OLFACTORY RECEPTOR	IPR017452	GPCR, rhodopsin-like, 7TM
ENSGALG00000026382	chr5	1028182	1029979	3	7	1024370	1058370	COR9	Olfactory receptor	Olfactory receptor-like protein COR9 [Source:UniProtKB/Swiss-Prot;Acc:Q98914]	ENSFM00730001521066	OLFACTORY RECEPTOR	IPR019424	7TM GPCR, olfactory receptor/chemoreceptor Srsx
ENSGALG00000025840	chr5	1041317	1042285	3	7	1024370	1058370	COR9	Olfactory receptor	Olfactory receptor-like protein COR9 [Source:UniProtKB/Swiss-Prot;Acc:Q98914]	ENSFM00730001521066	OLFACTORY RECEPTOR	IPR019424	7TM GPCR, olfactory receptor/chemoreceptor Srsx
ENSGALG00000021451	chr11	1039250	1041839	3	8	1038254	1065383		Oxidoreductase activity	Uncharacterized protein [Source:UniProtKB/TrEMBL;Acc:F1N9C1]	ENSFM00710001441906	{ECO:	IPR013968	Polyketide synthase, KR
ENSGALG00000021450	chr11	1044295	1057861	3	14	1038254	1065383		Oxidoreductase activity; Reproduction	Uncharacterized protein [Source:UniProtKB/TrEMBL;Acc:F1N9B0]	ENSFM00710001441906	{ECO:	IPR013968	Polyketide synthase, KR
ENSGALG00000028090	chr2	41236477	41280987	3	19	41222357	41257619	TOPAZ1	Reproduction	testis and ovary specific PAZ domain containing 1 [Source:HGNC Symbol;Acc:HGNC:24746]	ENSFM00250000010069	TESTIS AND OVARY SPECIFIC PAZ DOMAIN CONTAINING 1	-	-
ENSGALG00000020772	chr8	15439375	15487512	3	6	15431242	15468242		Reproduction: Vitellogenin	Uncharacterized protein [Source:UniProtKB/TrEMBL;Acc:E1BYN5]	ENSFM00250000000813	VITELLOGENIN PRECURSOR [CONTAINS LIPOVITELLIN I LVI ; PHOSVITIN PV ; LIPOVITELLIN II LVII	IPR015819	Lipid transport protein, beta-sheet shell
ENSGALG00000001863	chr8	15416743	15437448	3	8	15431242	15468242	VTG2	Reproduction: Vitellogenin	Gallus gallus vitellogenin 2 (VTG2), mRNA. [Source:RefSeq mRNA;Acc:NM_001031276]	ENSFM00250000000813	VITELLOGENIN PRECURSOR [CONTAINS LIPOVITELLIN I LVI ; PHOSVITIN PV ; LIPOVITELLIN II LVII	IPR029034	Cystine-knot cytokine
ENSGALG00000027291	chr1	77645788	77649134	9	26	77575029	77728988		serine-type peptidase activity	Uncharacterized protein [Source:UniProtKB/TrEMBL;Acc:F1N9P3]	ENSFM00730001521212	TRYPSIN PRECURSOR EC_3.4.21.4	IPR009003	Trypsin-like cysteine/serine peptidase domain
ENSGALG00000026354	chr1	77626337	77629983	9	24	77575029	77728988	PRSS3	serine-type peptidase activity	Uncharacterized protein [Source:UniProtKB/TrEMBL;Acc:F1N9P4]	ENSFM00730001521212	TRYPSIN PRECURSOR EC_3.4.21.4	IPR009003	Trypsin-like cysteine/serine peptidase domain
ENSGALG00000025752	chr1	77712776	77715424	10	24	77575029	77728988		serine-type peptidase activity	Uncharacterized protein [Source:UniProtKB/TrEMBL;Acc:R4GKK5]	ENSFM00730001521212	TRYPSIN PRECURSOR EC_3.4.21.4	IPR009003	Trypsin-like cysteine/serine peptidase domain
ENSGALG00000026064	chr1	77659665	77662349	9	22	77575029	77728988	PRSS3	serine-type peptidase activity	Gallus gallus protease, serine, 3 (PRSS3), mRNA. [Source:RefSeq mRNA;Acc:NM_205385]	ENSFM00730001521212	TRYPSIN PRECURSOR EC_3.4.21.4	IPR009003	Trypsin-like cysteine/serine peptidase domain
ENSGALG00000028502	chr1	139352103	139353239	3	8	139248152	139453581		Tumor necrosis factor ligand superfamily	Uncharacterized protein [Source:UniProtKB/TrEMBL;Acc:F1NA22]	ENSFM00250000006117	TUMOR NECROSIS FACTOR LIGAND SUPERFAMILY MEMBER 13B B CELL ACTIVATING FACTOR BAFF CD257 ANTIGEN [CONTAINS TUMOR NECROSIS FACTOR LIGAND SUPERFAMILY MEMBER 13B MEMBRANE FORM; TUMOR NECROSIS FACTOR LIGAND SUPERFAMILY MEMBER 13B SOLUBLE FORM]	IPR008983	Tumour necrosis factor-like domain
ENSGALG00000016852	chr1	139440677	139454301	3	9	139248152	139453581	BAFF	Tumor necrosis factor ligand superfamily	Gallus gallus tumor necrosis factor (ligand) superfamily, member 13b (TNFSF13B), mRNA. [Source:RefSeq mRNA;Acc:NM_204327]	ENSFM00250000006117	TUMOR NECROSIS FACTOR LIGAND SUPERFAMILY MEMBER 13B B CELL ACTIVATING FACTOR BAFF CD257 ANTIGEN [CONTAINS TUMOR NECROSIS FACTOR LIGAND SUPERFAMILY MEMBER 13B MEMBRANE FORM; TUMOR NECROSIS FACTOR LIGAND SUPERFAMILY MEMBER 13B SOLUBLE FORM]	IPR008983	Tumour necrosis factor-like domain
ENSGALG00000015506	chr1	94474405	94635350	3	6	94514368	94541852	GBE1	amylase activity	glucan (1,4-alpha-), branching enzyme 1 [Source:HGNC Symbol;Acc:HGNC:4180]	ENSFM00250000003836	1 4 ALPHA GLUCAN BRANCHING ENZYME EC_2.4.1.18 GLYCOGEN BRANCHING ENZYME	IPR017853	Glycoside hydrolase, superfamily
ENSGALG00000005114	chr11	10631033	10639450	3	9	10626935	10647935		carboxylesterase	Uncharacterized protein [Source:UniProtKB/TrEMBL;Acc:F1NYT3]	ENSFM00350000105388	CARBOXYLESTERASE	IPR029058	Alpha/Beta hydrolase fold
ENSGALG00000005756	chr27	341006	341701	3	14	201508	372441			Uncharacterized protein [Source:UniProtKB/TrEMBL;Acc:E1C5V9]	ENSFM00710001442953	UNKNOWN	IPR013106	Immunoglobulin V-set domain
ENSGALG00000026169	chr27	382504	388789	3	21	379576	435975			Uncharacterized protein [Source:UniProtKB/TrEMBL;Acc:R4GKI7]	ENSFM00670001261982	UNKNOWN	IPR013106	Immunoglobulin V-set domain
ENSGALG00000027679	chr27	512845	513150	8	76	437975	877259			Uncharacterized protein [Source:UniProtKB/TrEMBL;Acc:E1BXQ5]	ENSFM00670001236030	FEATHER KERATIN F KER	IPR003461	Keratin
ENSGALG00000026257	chr27	471565	471870	19	59	437975	877259			Uncharacterized protein [Source:UniProtKB/TrEMBL;Acc:E1BXQ5]	ENSFM00670001236030	FEATHER KERATIN F KER	IPR003461	Keratin
ENSGALG00000027859	chr27	576304	576609	22	77	437975	877259			Uncharacterized protein [Source:UniProtKB/TrEMBL;Acc:E1BXQ5]	ENSFM00670001236030	FEATHER KERATIN F KER	IPR003461	Keratin
ENSGALG00000028366	chr27	478799	479104	18	55	437975	877259			Uncharacterized protein [Source:UniProtKB/TrEMBL;Acc:E1BXQ5]	ENSFM00670001236030	FEATHER KERATIN F KER	IPR003461	Keratin
ENSGALG00000025863	chr27	655397	661272	5	48	437975	877259			Uncharacterized protein [Source:UniProtKB/TrEMBL;Acc:R4GKM4]	ENSFM00670001236030	FEATHER KERATIN F KER	IPR003461	Keratin
ENSGALG00000028287	chr27	497221	497526	12	41	437975	877259			Uncharacterized protein [Source:UniProtKB/TrEMBL;Acc:E1C3W4]	ENSFM00670001236030	FEATHER KERATIN F KER	IPR003461	Keratin
ENSGALG00000017622	chr1	2745147	2747359	3	16	2731227	2754200			Uncharacterized protein [Source:UniProtKB/TrEMBL;Acc:F1NFV3]	ENSFM00630001050589	G2/M PHASE SPECIFIC E3 UBIQUITIN LIGASE EC_6.3.2.-	IPR011011	Zinc finger, FYVE/PHD-type
ENSGALG00000010200	chr1	36575949	36791862	11	42	36642573	36656573	TRHDE		thyrotropin-releasing hormone degrading enzyme [Source:HGNC Symbol;Acc:HGNC:30748]	ENSFM00250000000130	AMINOPEPTIDASE N AP N EC_3.4.11.2 MICROSOMAL AMINOPEPTIDASE	IPR014782	Peptidase M1, membrane alanine aminopeptidase, N-terminal
ENSGALG00000012518	chr1	51403706	51417083	3	7	51386044	51419565			Uncharacterized protein [Source:UniProtKB/TrEMBL;Acc:F1NCG4]	ENSFM00250000005817	CYTOKINE RECEPTOR COMMON SUBUNIT BETA PRECURSOR GM CSF/IL 3/IL 5 RECEPTOR COMMON BETA SUBUNIT CD131 ANTIGEN	IPR003961	Fibronectin, type III
ENSGALG00000025881	chr1	51386520	51393690	3	7	51386044	51419565			Uncharacterized protein [Source:UniProtKB/TrEMBL;Acc:R4GJW7]	ENSFM00250000005817	CYTOKINE RECEPTOR COMMON SUBUNIT BETA PRECURSOR GM CSF/IL 3/IL 5 RECEPTOR COMMON BETA SUBUNIT CD131 ANTIGEN	IPR003961	Fibronectin, type III
ENSGALG00000012934	chr1	59238140	59411414	4	33	59324506	59334506	BICD1		bicaudal D homolog 1 (Drosophila) [Source:HGNC Symbol;Acc:HGNC:1049]	ENSFM00250000002108	BICAUDAL D HOMOLOG BIC D	IPR018477	Bicaudal-D protein, microtubule-associated
ENSGALG00000028377	chr1	59331587	59332594	4	33	59324506	59334506			Uncharacterized protein [Source:UniProtKB/TrEMBL;Acc:R4GLS3]	ENSFM00710001448218	E3 UBIQUITIN LIGASE TOPOR {ECO: |EMBL: 1}	IPR018957	Zinc finger, C3HC4 RING-type
ENSGALG00000025798	chr1	73719066	73720392	12	42	73707091	73730677			Uncharacterized protein [Source:UniProtKB/TrEMBL;Acc:R4GJW3]	ENSFM00610000956713	UNKNOWN	IPR012337	Ribonuclease H-like domain
ENSGALG00000014347	chr1	74805580	74818341	3	6	74797236	74811236	PARP11		poly (ADP-ribose) polymerase family, member 11 [Source:HGNC Symbol;Acc:HGNC:1186]	ENSFM00500000272096	POLY [ADP RIBOSE] POLYMERASE 11 PARP 11 EC_2.4.2.30 ADP RIBOSYLTRANSFERASE DIPHTHERIA TOXIN 11 ARTD11	IPR012317	Poly(ADP-ribose) polymerase, catalytic domain
ENSGALG00000027215	chr1	77640523	77641850	10	34	77575029	77728988			Uncharacterized protein [Source:UniProtKB/TrEMBL;Acc:R4GLC8]	ENSFM00610000956713	UNKNOWN	IPR002156	Ribonuclease H domain
ENSGALG00000028416	chr1	88859673	88860818	32	191	88854069	88929124			Uncharacterized protein [Source:UniProtKB/TrEMBL;Acc:R4GGF9]	ENSFM00670001235798	INOSITOL 1 4 5 TRISPHOSPHATE RECEPTOR INTERACTING PRECURSOR	IPR016154	Heat shock protein Hsp33, C-terminal
ENSGALG00000015737	chr1	100155276	100281469	15	40	100225642	100231642	NCAM2		neural cell adhesion molecule 2 [Source:HGNC Symbol;Acc:HGNC:7657]	ENSFM00250000000779	NEURAL CELL ADHESION MOLECULE 1 PRECURSOR N CAM 1 NCAM 1	IPR013151	Immunoglobulin
ENSGALG00000016305	chr1	112670966	112673532	24	98	112645031	112697615			-	ENSFM00500000281203	HEAT REPEAT CONTAINING 7A {ECO: |EMBL: 1}	-	-
ENSGALG00000018838	chr1	122897456	122899552	20	102	122890927	122907927			Uncharacterized protein [Source:UniProtKB/TrEMBL;Acc:E1C8E3]	ENSFM00500000281203	HEAT REPEAT CONTAINING 7A {ECO: |EMBL: 1}	-	-
ENSGALG00000016593	chr1	122896520	122898307	12	66	122890927	122907927			Uncharacterized protein [Source:UniProtKB/TrEMBL;Acc:E1BRN9]	ENSFM00250000032169	UNKNOWN	-	-
ENSGALG00000016808	chr1	135763887	135793418	3	63	135618972	135792184	RANBP2		RAN binding protein 2 [Source:HGNC Symbol;Acc:HGNC:9848]	ENSFM00500000270422	RANBP2 AND GRIP DOMAIN CONTAINING RAN BINDING 2 RANBP2 RANB	IPR029000	Cyclophilin-like domain
ENSGALG00000016807	chr1	135569607	135633559	4	53	135618972	135792184	LIMS1		Gallus gallus LIM and senescent cell antigen-like domains 1 (LIMS1), mRNA. [Source:RefSeq mRNA;Acc:NM_001001766]	ENSFM00250000001212	LIM AND SENESCENT CELL ANTIGEN CONTAINING DOMAIN PARTICULARLY INTERESTING NEW CYS HIS PINCH	IPR017351	LIM and senescent cell antigen-like-containing domain protein 1
ENSGALG00000013985	chr1	139386530	139404977	3	32	139248152	139453581			Uncharacterized protein [Source:UniProtKB/TrEMBL;Acc:H9L0P9]	ENSFM00500000270422	RANBP2 AND GRIP DOMAIN CONTAINING RAN BINDING 2 RANBP2 RANB	IPR019734	Tetratricopeptide repeat
ENSGALG00000016601	chr1	171273749	171277776	4	79	171259185	171283185			Uncharacterized protein [Source:UniProtKB/TrEMBL;Acc:E1BRN0]	ENSFM00500000281203	HEAT REPEAT CONTAINING 7A {ECO: |EMBL: 1}	IPR016024	Armadillo-type fold
ENSGALG00000017269	chr1	192008564	192029116	4	22	191959051	192010267			Ubiquitin carboxyl-terminal hydrolase [Source:UniProtKB/TrEMBL;Acc:E1C6Z2]	ENSFM00250000004025	UBIQUITIN CARBOXYL TERMINAL HYDROLASE 38 EC_3.4.19.12 DEUBIQUITINATING ENZYME 38 UBIQUITIN THIOESTERASE 38 UBIQUITIN SPECIFIC PROCESSING PROTEASE 38	IPR028889	Ubiquitin carboxyl-terminal hydrolase-like domain
ENSGALG00000017323	chr1	194561126	194668318	10	82	194620055	194630055	FAM168A		family with sequence similarity 168, member A [Source:HGNC Symbol;Acc:HGNC:28999]	ENSFM00670001235752	MYELIN ASSOCIATED NEURITE OUTGROWTH INHIBITOR MANI	-	-
ENSGALG00000001269	chr10	46934	63021	3	30	15000	78000			Uncharacterized protein [Source:UniProtKB/TrEMBL;Acc:E1C2L8]	ENSFM00500000270422	RANBP2 AND GRIP DOMAIN CONTAINING RAN BINDING 2 RANBP2 RANB	IPR019734	Tetratricopeptide repeat
ENSGALG00000027405	chr10	36180	42573	3	8	15000	78000			Uncharacterized protein [Source:UniProtKB/TrEMBL;Acc:R4GLM9]	ENSFM00250000001212	LIM AND SENESCENT CELL ANTIGEN CONTAINING DOMAIN PARTICULARLY INTERESTING NEW CYS HIS PINCH	IPR001781	Zinc finger, LIM-type
ENSGALG00000029029	chr10	266366	267315	11	36	128000	322435			Uncharacterized protein [Source:UniProtKB/TrEMBL;Acc:R4GMB9]	ENSFM00710001456535	UNKNOWN	IPR003461	Keratin
ENSGALG00000002590	chr12	25698	75398	3	24	9408	83274			Uncharacterized protein [Source:UniProtKB/TrEMBL;Acc:E1BUB3]	ENSFM00500000270422	RANBP2 AND GRIP DOMAIN CONTAINING RAN BINDING 2 RANBP2 RANB	IPR019734	Tetratricopeptide repeat
ENSGALG00000014148	chr12	14358	22531	3	8	9408	83274			Uncharacterized protein [Source:UniProtKB/TrEMBL;Acc:F1NZ01]	ENSFM00250000001212	LIM AND SENESCENT CELL ANTIGEN CONTAINING DOMAIN PARTICULARLY INTERESTING NEW CYS HIS PINCH	IPR001781	Zinc finger, LIM-type
ENSGALG00000002335	chr12	2064730	2203333	13	52	2071482	2095745	DOCK3		dedicator of cytokinesis 3 [Source:HGNC Symbol;Acc:HGNC:2989]	ENSFM00760001714721	DEDICATOR OF CYTOKINESIS 3 MODIFIER OF CELL ADHESION PRESENILIN BINDING PBP	IPR016024	Armadillo-type fold
ENSGALG00000002436	chr12	2307481	2309288	3	58	2271389	2369750			Uncharacterized protein [Source:UniProtKB/TrEMBL;Acc:F1NWJ3]	ENSFM00630001050589	G2/M PHASE SPECIFIC E3 UBIQUITIN LIGASE EC_6.3.2.-	IPR011011	Zinc finger, FYVE/PHD-type
ENSGALG00000029091	chr12	2328918	2330708	3	41	2271389	2369750			Uncharacterized protein [Source:UniProtKB/TrEMBL;Acc:F1P1G2]	ENSFM00710001444374	UNKNOWN	IPR011011	Zinc finger, FYVE/PHD-type
ENSGALG00000002459	chr12	2743055	2744903	5	48	2718872	2756614			Uncharacterized protein [Source:UniProtKB/TrEMBL;Acc:F1NWF4]	ENSFM00630001050589	G2/M PHASE SPECIFIC E3 UBIQUITIN LIGASE EC_6.3.2.-	IPR011011	Zinc finger, FYVE/PHD-type
ENSGALG00000021350	chr12	2718771	2723984	3	8	2718872	2756614			Uncharacterized protein [Source:UniProtKB/TrEMBL;Acc:F1NIE4]	ENSFM00710001446224	UNKNOWN	-	-
ENSGALG00000027650	chr12	3237733	3239576	7	72	3225796	3245120			Uncharacterized protein [Source:UniProtKB/TrEMBL;Acc:H9KZF3]	ENSFM00630001050589	G2/M PHASE SPECIFIC E3 UBIQUITIN LIGASE EC_6.3.2.-	IPR011011	Zinc finger, FYVE/PHD-type
ENSGALG00000027060	chr12	5112170	5114014	8	61	5103781	5118912			Uncharacterized protein [Source:UniProtKB/TrEMBL;Acc:F1NPS7]	ENSFM00630001050589	G2/M PHASE SPECIFIC E3 UBIQUITIN LIGASE EC_6.3.2.-	IPR011011	Zinc finger, FYVE/PHD-type
ENSGALG00000001009	chr13	135780	139265	3	26	84400	136177			Uncharacterized protein [Source:UniProtKB/TrEMBL;Acc:F1P1T8]	ENSFM00730001521419	PROTOCADHERIN BETA PRECURSOR PCDH BETA	IPR015919	Cadherin-like
ENSGALG00000028320	chr13	89860	100271	3	37	84400	136177			Uncharacterized protein [Source:UniProtKB/TrEMBL;Acc:R4GGA1]	ENSFM00730001521419	PROTOCADHERIN BETA PRECURSOR PCDH BETA	IPR015919	Cadherin-like
ENSGALG00000026141	chr13	89809	91332	3	37	84400	136177			Uncharacterized protein [Source:UniProtKB/TrEMBL;Acc:R4GL65]	ENSFM00710001462564	UNKNOWN	-	-
ENSGALG00000018772	chr18	30334	33130	5	68	11000	50867	ZNF302		Gallus gallus zinc finger protein 302 (ZNF302), mRNA. [Source:RefSeq mRNA;Acc:NM_001030695]	ENSFM00710001442183	UNCHARACTERIZED {ECO: |EMBL: 1}	IPR015880	Zinc finger, C2H2-like
ENSGALG00000001740	chr18	4139174	4184210	4	22	4158122	4163122	MGAT5B		mannosyl (alpha-1,6-)-glycoprotein beta-1,6-N-acetyl-glucosaminyltransferase, isozyme B [Source:HGNC Symbol;Acc:HGNC:24140]	ENSFM00250000001404	ALPHA 1 6 MANNOSYLGLYCOPROTEIN 6 BETA N ACETYLGLUCOSAMINYLTRANSFERASE A EC_2.4.1.155 ALPHA MANNOSIDE BETA 1 6 N ACETYLGLUCOSAMINYLTRANSFERASE GLCNAC T V GNT V MANNOSIDE ACETYLGLUCOSAMINYLTRANSFERASE 5 N ACETYLGLUCOSAMINYL TRANSFERASE V	-	-
ENSGALG00000013049	chr2	29878	90506	31	70	31074	44079	SMARCD3		SWI/SNF related, matrix associated, actin dependent regulator of chromatin, subfamily d, member 3 [Source:HGNC Symbol;Acc:HGNC:11108]	ENSFM00250000001625	SWI/SNF RELATED MATRIX ASSOCIATED ACTIN DEPENDENT REGULATOR OF CHROMATIN SUBFAMILY D MEMBER KDA BRG 1/BRM ASSOCIATED FACTOR SUBUNIT BRG1 ASSOCIATED FACTOR	IPR019835	SWIB domain
ENSGALG00000023347	chr2	15793697	15802765	3	8	15750689	15808707			Uncharacterized protein [Source:UniProtKB/TrEMBL;Acc:F1P513]	ENSFM00500000270772	PATCHED DOMAIN CONTAINING 3	IPR003392	Patched
ENSGALG00000010942	chr2	31110177	31116556	7	68	31107832	31260092	NUPL2		Gallus gallus nucleoporin like 2 (NUPL2), mRNA. [Source:RefSeq mRNA;Acc:NM_001030984]	ENSFM00250000005665	NUCLEOPORIN 2	IPR000571	Zinc finger, CCCH-type
ENSGALG00000013110	chr2	42365378	42368195	7	44	42357429	42375429			Uncharacterized protein [Source:UniProtKB/TrEMBL;Acc:E1C967]	ENSFM00500000279068	SAD1/UNC 84 DOMAIN CONTAINING 1 {ECO: |EMBL: 1} FRAGMENT {ECO: |EMBL: 1}	IPR012919	Sad1/UNC-like, C-terminal
ENSGALG00000011598	chr2	42317870	42414062	7	44	42357429	42375429	NEK11		NIMA-related kinase 11 [Source:HGNC Symbol;Acc:HGNC:18593]	ENSFM00500000271879	SERINE/THREONINE KINASE NEK11 EC_2.7.11.1 NEVER IN MITOSIS A RELATED KINASE 11 NIMA RELATED KINASE 11	IPR020635	Tyrosine-protein kinase, catalytic domain
ENSGALG00000023030	chr2	49683198	49706811	3	34	49679436	49731156			Uncharacterized protein [Source:UniProtKB/TrEMBL;Acc:F1NMQ5]	ENSFM00420000199312	UNKNOWN	-	-
ENSGALG00000012389	chr2	53643866	53934916	3	85	53893824	53903943			Uncharacterized protein [Source:UniProtKB/TrEMBL;Acc:F1NDL7]	ENSFM00250000000380	CONTACTIN ASSOCIATED 5 PRECURSOR CELL RECOGNITION MOLECULE CASPR5	IPR008985	Concanavalin A-like lectin/glucanases superfamily
ENSGALG00000012391	chr2	53983169	54263074	3	59	54139508	54155508			Uncharacterized protein [Source:UniProtKB/TrEMBL;Acc:F1NDL6]	ENSFM00250000000380	CONTACTIN ASSOCIATED 5 PRECURSOR CELL RECOGNITION MOLECULE CASPR5	IPR008985	Concanavalin A-like lectin/glucanases superfamily
ENSGALG00000012650	chr2	56286727	56359738	3	12	56287943	56318943	PQLC1		PQ loop repeat containing 1 [Source:HGNC Symbol;Acc:HGNC:26188]	ENSFM00250000003501	PQ LOOP REPEAT CONTAINING 1	IPR006603	PQ-loop repeat
ENSGALG00000027602	chr2	56297533	56302379	4	12	56287943	56318943			Uncharacterized protein [Source:UniProtKB/TrEMBL;Acc:R4GF93]	ENSFM00710001464609	UNKNOWN	-	-
ENSGALG00000013105	chr2	79536612	79541020	7	47	79527136	79540136			Uncharacterized protein [Source:UniProtKB/TrEMBL;Acc:E1C5H2]	ENSFM00500000279068	SAD1/UNC 84 DOMAIN CONTAINING 1 {ECO: |EMBL: 1} FRAGMENT {ECO: |EMBL: 1}	IPR012919	Sad1/UNC-like, C-terminal
ENSGALG00000017691	chr2	80786851	80796524	4	37	80763897	80799613			Uncharacterized protein [Source:UniProtKB/TrEMBL;Acc:F1NSE9]	ENSFM00500000279068	SAD1/UNC 84 DOMAIN CONTAINING 1 {ECO: |EMBL: 1} FRAGMENT {ECO: |EMBL: 1}	IPR012919	Sad1/UNC-like, C-terminal
ENSGALG00000023084	chr2	80772106	80776769	6	43	80763897	80799613			Uncharacterized protein [Source:UniProtKB/TrEMBL;Acc:E1C5H3]	ENSFM00500000279068	SAD1/UNC 84 DOMAIN CONTAINING 1 {ECO: |EMBL: 1} FRAGMENT {ECO: |EMBL: 1}	IPR012919	Sad1/UNC-like, C-terminal
ENSGALG00000029116	chr2	120375979	120383310	7	79	120241029	120387873			Uncharacterized protein [Source:UniProtKB/TrEMBL;Acc:E1C801]	ENSFM00710001447800	UNKNOWN	-	-
ENSGALG00000004309	chr20	5823557	5833445	7	21	5825246	5847246	GDAP1L1		ganglioside induced differentiation associated protein 1-like 1 [Source:HGNC Symbol;Acc:HGNC:4213]	ENSFM00250000004188	GANGLIOSIDE INDUCED DIFFERENTIATION ASSOCIATED 1 GDAP1	IPR012336	Thioredoxin-like fold
ENSGALG00000004321	chr20	5837979	5845069	8	32	5825246	5847246	C20H20ORF111		Gallus gallus chromosome 20 open reading frame, human C20orf111 (C20H20orf111), mRNA. [Source:RefSeq mRNA;Acc:NM_001029981]	ENSFM00250000007612	OXIDATIVE STRESS RESPONSIVE SERINE RICH 1 OXIDATIVE STRESS RESPONSIVE 1 PEROXIDE INDUCIBLE TRANSCRIPT 1	IPR008494	Protein of unknown function DUF776
ENSGALG00000021174	chr24	6249882	6274575	3	7	6260294	6286294			Uncharacterized protein [Source:UniProtKB/TrEMBL;Acc:E1C456]	ENSFM00250000002920	ALPHA 1 2 MANNOSYLTRANSFERASE ALG9 EC_2.4.1.259 EC_2.4.1.- 261 ASPARAGINE LINKED GLYCOSYLATION 9 HOMOLOG DISRUPTED IN BIPOLAR DISORDER 1 DOL P MAN:MAN 6 GLCNAC 2 PP DOL ALPHA 1 2 MANNOSYLTRANSFERASE DOL P MAN:MAN 8 GLCNAC 2 PP DOL ALPHA 1 2 MANNOSYLTRANSF	IPR005599	GPI mannosyltransferase
ENSGALG00000025726	chr27	899566	899871	7	16	893259	1050064			Uncharacterized protein [Source:UniProtKB/TrEMBL;Acc:E1C3X5]	ENSFM00670001236030	FEATHER KERATIN F KER	IPR003461	Keratin
ENSGALG00000027432	chr3	7098	8857	3	19	2000	24050			Uncharacterized protein [Source:UniProtKB/TrEMBL;Acc:R4GFT2]	ENSFM00710001458319	UNKNOWN	-	-
ENSGALG00000016276	chr3	85488292	85794879	32	74	85543472	85549472	KHDRBS2		KH domain containing, RNA binding, signal transduction associated 2 [Source:HGNC Symbol;Acc:HGNC:18114]	ENSFM00400000131768	KH DOMAIN CONTAINING RNA BINDING SIGNAL TRANSDUCTION ASSOCIATED SAM68 MAMMALIAN SLM	IPR004088	K Homology domain, type 1
ENSGALG00000016732	chr3	110408883	110427745	3	373	110384839	110442760			Uncharacterized protein [Source:UniProtKB/TrEMBL;Acc:F1NEV6]	ENSFM00250000002130	GC RICH SEQUENCE DNA BINDING FACTOR 2 GC RICH SEQUENCE DNA BINDING FACTOR TRANSCRIPTION FACTOR 9 TCF 9	IPR022783	GC-rich sequence DNA-binding factor domain
ENSGALG00000007755	chr4	12334793	12373652	6	10	12359948	12364948	KIAA2022		KIAA2022 [Source:HGNC Symbol;Acc:HGNC:29433]	ENSFM00250000008212	AMBIGUOUS	-	-
ENSGALG00000020160	chr4	59572341	59590088	3	17	59567051	59596689	ADH6		Gallus gallus alcohol dehydrogenase 6 (class V) (ADH6), mRNA. [Source:RefSeq mRNA;Acc:NM_205092]	ENSFM00250000000515	ALCOHOL DEHYDROGENASE EC_1.1.1.1 ALCOHOL DEHYDROGENASE	IPR020843	Polyketide synthase, enoylreductase
ENSGALG00000027201	chr4	76600159	76601874	14	69	76595607	76605607			Uncharacterized protein [Source:UniProtKB/TrEMBL;Acc:R4GM39]	ENSFM00710001456633	UNKNOWN	IPR008919	Retrovirus capsid, N-terminal core
ENSGALG00000025970	chr4	85319010	85350017	3	23	85224159	85442028			Uncharacterized protein [Source:UniProtKB/TrEMBL;Acc:R4GL79]	ENSFM00250000004957	CD8 ALPHA {ECO: |EMBL: 1}	IPR013106	Immunoglobulin V-set domain
ENSGALG00000026202	chr4	85378005	85379282	3	11	85224159	85442028			Uncharacterized protein [Source:UniProtKB/TrEMBL;Acc:F1NK02]	ENSFM00250000004957	CD8 ALPHA {ECO: |EMBL: 1}	IPR013106	Immunoglobulin V-set domain
ENSGALG00000026496	chr4	85249081	85356479	3	36	85224159	85442028			Uncharacterized protein [Source:UniProtKB/TrEMBL;Acc:R4GFG8]	ENSFM00250000004957	CD8 ALPHA {ECO: |EMBL: 1}	IPR013106	Immunoglobulin V-set domain
ENSGALG00000015852	chr4	85368613	85373125	3	24	85224159	85442028			Uncharacterized protein [Source:UniProtKB/TrEMBL;Acc:F1P1Q2]	ENSFM00250000004957	CD8 ALPHA {ECO: |EMBL: 1}	IPR013106	Immunoglobulin V-set domain
ENSGALG00000028464	chr4	85286779	85292760	3	22	85224159	85442028			Uncharacterized protein [Source:UniProtKB/TrEMBL;Acc:R4GLH3]	ENSFM00710001444725	UNKNOWN	IPR013106	Immunoglobulin V-set domain
ENSGALG00000013311	chr5	3278139	3399446	30	68	3312978	3321044	ANO3		Gallus gallus anoctamin 3 (ANO3), transcript variant 1, mRNA. [Source:RefSeq mRNA;Acc:NM_001199465]	ENSFM00250000000240	ANOCTAMIN TRANSMEMBRANE	IPR007632	Anoctamin
ENSGALG00000022206	chr5	5713857	5721887	3	6	5711135	5837110			Uncharacterized protein [Source:UniProtKB/TrEMBL;Acc:H9L0H8]	ENSFM00250000001777	CYTOPLASMIC DYNEIN 1 LIGHT INTERMEDIATE CHAIN 1 DYNEIN LIGHT CHAIN A DLC A DYNEIN LIGHT INTERMEDIATE CHAIN 1 CYTOSOLIC	IPR027417	P-loop containing nucleoside triphosphate hydrolase
ENSGALG00000023869	chr5	5774404	5793157	9	55	5711135	5837110			Uncharacterized protein [Source:UniProtKB/TrEMBL;Acc:F1NZE6]	ENSFM00740001595811	UNKNOWN	-	-
ENSGALG00000006740	chr5	14079795	14176709	8	66	14145205	14156205	MUC5B		Uncharacterized protein [Source:UniProtKB/TrEMBL;Acc:E1C037]	ENSFM00740001589089	MUCIN PRECURSOR MUC MUCIN	IPR014853	Uncharacterised domain, cysteine-rich
ENSGALG00000010831	chr5	16165089	16180665	3	35	16158040	16210993			Uncharacterized protein [Source:UniProtKB/TrEMBL;Acc:F1NAZ0]	ENSFM00740001589075	PRECURSOR	IPR017448	SRCR-like domain
ENSGALG00000028071	chr5	16196911	16205393	3	33	16158040	16210993			Uncharacterized protein [Source:UniProtKB/TrEMBL;Acc:R4GIT4]	ENSFM00740001589075	PRECURSOR	IPR017448	SRCR-like domain
ENSGALG00000001813	chr6	31077	35916	3	8	0	42449			Uncharacterized protein [Source:UniProtKB/TrEMBL;Acc:F1NFT3]	ENSFM00770001847646	MONOCARBOXYLATE TRANSPORTER 9 MCT 9 SOLUTE CARRIER FAMILY 16 MEMBER 9	IPR016196	Major facilitator superfamily domain, general substrate transporter
ENSGALG00000002327	chr6	2926344	3201956	3	42	3180547	3240938	NRG3		neuregulin 3 [Source:HGNC Symbol;Acc:HGNC:7999]	ENSFM00250000008994	PRO NEUREGULIN 3 MEMBRANE BOUND PRECURSOR PRO NRG3 [CONTAINS NEUREGULIN 3 NRG 3 ]	IPR002154	Neuregulin 1-related, C-terminal
ENSGALG00000024315	chr6	5484368	5485399	8	48	5479814	5494814			Uncharacterized protein [Source:UniProtKB/TrEMBL;Acc:E1BQY1]	ENSFM00420000224840	UNKNOWN	-	-
ENSGALG00000025843	chr6	10643899	10644930	13	48	10640197	10724911			Uncharacterized protein [Source:UniProtKB/TrEMBL;Acc:R4GLE5]	ENSFM00710001464630	UNKNOWN	-	-
ENSGALG00000006470	chr6	18995048	19027653	3	6	18984313	19036111	KIF20B		kinesin family member 20B [Source:HGNC Symbol;Acc:HGNC:7212]	ENSFM00730001521759	KINESIN KIF20B KINESIN RELATED MOTOR INTERACTING WITH PIN1 M PHASE PHOSPHOPROTEIN 1 MPP1	IPR027417	P-loop containing nucleoside triphosphate hydrolase
ENSGALG00000026309	chr6	19469700	19481511	3	6	19463111	19481111			-	ENSFM00730001521759	KINESIN KIF20B KINESIN RELATED MOTOR INTERACTING WITH PIN1 M PHASE PHOSPHOPROTEIN 1 MPP1	-	-
ENSGALG00000023424	chr6	30850164	30865241	5	64	30849047	30863047			Uncharacterized protein [Source:UniProtKB/TrEMBL;Acc:E1BZF9]	ENSFM00740001589075	PRECURSOR	IPR017448	SRCR-like domain
ENSGALG00000029149	chr7	3367	4695	9	31	4000	22788			Uncharacterized protein [Source:UniProtKB/TrEMBL;Acc:R4GJK2]	ENSFM00610000956713	UNKNOWN	IPR012337	Ribonuclease H-like domain
ENSGALG00000012587	chr7	36209704	36213218	3	5	36208693	36229693	NAA20		N(alpha)-acetyltransferase 20, NatB catalytic subunit [Source:HGNC Symbol;Acc:HGNC:15908]	ENSFM00500000271700	N ALPHA ACETYLTRANSFERASE 20 EC_2.3.1.88 METHIONINE N ACETYLTRANSFERASE N ACETYLTRANSFERASE 5 N TERMINAL ACETYLTRANSFERASE B COMPLEX CATALYTIC SUBUNIT NAA20 N TERMINAL ACETYLTRANSFERASE B COMPLEX CATALYTIC SUBUNIT NAT5 NATB COMPLEX SUBUNIT NAT5 NATB CATAL	IPR016181	Acyl-CoA N-acyltransferase
ENSGALG00000011041	chr8	27186950	27217638	3	6	27196596	27207596	DNAJC6		Gallus gallus DnaJ (Hsp40) homolog, subfamily C, member 6 (DNAJC6), mRNA. [Source:RefSeq mRNA;Acc:NM_001177415]	ENSFM00250000001678	TYROSINE PHOSPHATASE AUXILIN EC_3.1.3.48 DNAJ HOMOLOG SUBFAMILY C MEMBER 6	IPR029023	Tensin phosphatase, lipid phosphatase domain

## Sheet: S6 Table
Chromosome	Beg	End	LXD1	LXD2	LXD3	LXD4	LXD5	LXD7	LXD8	LXD9	WL1	WL2	WL3	WL4	WL7	WL8	RW1	RW2	RW3	RW4	RW7	RW8	RW9	RW10	SILK1	SILK2	SILK3	SILK4	SILK5	SILK8	SILK9	SILK10	SILK11	XH1	XH2	XH3	XH4	XH5	XH6	XH7	XH8	YOU1	YOU2	YOU3	YOU4	YOU5	YOU7	YOU8	YOU9
chr9	4585036	4586805	2	2	1	1	2	2	2	2	2	2	2	2	2	2	2	1	2	2	1	2	1	2	2	2	2	2	1	2	2	2	2	2	2	2	1	2	2	2	2	2	2	2	2	2	2	2	1
chr9	6075545	6077289	25	28	30	28	28	25	22	22	21	18	12	19	11	18	24	34	16	30	15	15	12	12	19	16	18	32	46	18	12	18	20	38	32	19	16	20	24	17	25	13	17	18	23	24	17	19	16
chr9	6077289	6079060	5	5	6	6	6	5	5	2	5	5	3	3	3	5	5	5	4	5	4	4	3	3	4	5	4	6	4	4	4	4	4	7	5	4	3	5	6	4	6	3	5	4	5	5	4	5	1
chr9	6381249	6385112	12	14	15	14	15	13	12	13	11	10	7	10	7	9	12	15	9	16	8	8	8	7	10	9	9	16	24	10	7	10	10	18	15	11	9	11	12	9	13	7	9	10	12	12	9	10	11
chr9	6385112	6386112	21	23	25	23	24	20	19	16	17	16	11	16	11	17	21	29	15	24	14	14	11	11	16	14	15	25	35	15	11	16	18	31	27	16	15	16	20	14	21	11	15	14	18	21	14	15	12
chr9	7252750	7254071	7	7	6	7	7	7	5	8	5	4	4	5	4	3	6	7	4	7	4	5	5	4	5	4	4	7	13	5	4	5	5	8	7	6	4	5	6	5	6	4	5	4	5	6	5	5	5
chr9	7254071	7255551	17	20	23	21	20	17	17	12	15	14	9	14	9	16	19	27	12	20	12	13	9	9	14	13	13	23	28	12	9	14	16	27	23	13	12	13	18	12	18	9	13	12	16	19	12	13	9
chr9	7673739	7674809	2	2	3	3	2	3	3	3	2	3	3	3	3	3	3	3	3	2	3	3	3	3	2	3	3	3	4	3	2	2	3	3	3	2	3	3	2	3	3	2	3	3	3	3	2	3	3
chr9	10628091	10629148	2	2	2	2	2	2	2	2	2	2	2	2	2	2	2	2	2	2	2	2	2	2	2	2	2	2	2	2	2	2	2	2	2	2	2	2	2	2	2	2	2	2	2	2	2	2	2
chr9	10863637	10864940	2	2	2	2	2	2	2	2	2	2	2	2	2	2	2	2	1	2	2	2	2	2	2	2	2	2	2	2	2	2	2	2	2	2	2	2	2	2	2	2	2	2	2	2	2	2	2
chr9	11369576	11370576	2	2	2	2	2	2	2	2	2	2	2	2	2	2	2	2	2	2	2	2	2	2	2	2	2	2	1	2	2	2	2	2	2	2	2	2	2	2	2	2	2	2	2	2	2	2	1
chr9	12150187	12151240	2	2	2	2	2	2	2	2	2	2	2	2	2	2	2	2	2	3	2	2	2	2	2	2	2	2	2	2	2	2	2	2	2	2	2	2	2	2	2	2	2	2	2	2	2	2	2
chr9	14439762	14440762	2	2	2	2	2	2	2	2	2	2	2	2	2	2	2	2	2	2	2	2	2	2	2	2	2	2	2	2	2	2	2	2	2	2	2	2	2	2	2	2	2	2	2	2	2	2	3
chr9	14777229	14778268	2	2	1	2	1	2	2	2	2	2	2	2	2	2	2	2	2	2	2	2	2	2	2	2	1	2	2	2	2	2	2	2	2	2	2	2	2	1	2	2	2	2	2	2	2	2	2
chr9	14778268	14779268	2	2	2	2	2	2	2	2	2	2	2	2	2	2	2	2	2	2	2	2	2	2	2	1	2	2	1	2	2	2	2	2	2	2	2	2	2	2	2	2	2	2	2	2	2	2	2
chr9	14781268	14782395	2	2	2	2	2	2	2	2	2	1	2	2	2	2	2	2	2	2	2	2	2	1	1	2	2	2	2	2	2	2	2	2	2	2	2	1	2	2	2	2	2	2	2	2	2	2	2
chr9	16338604	16339604	1	1	1	1	1	1	1	1	1	1	1	1	1	1	1	1	1	1	1	1	1	1	1	1	1	1	0	1	1	1	1	0	1	1	1	1	1	1	1	1	2	1	1	1	1	2	1
chr9	16341768	16342914	1	1	1	1	1	1	1	1	1	1	1	1	1	1	1	1	1	1	0	0	1	1	1	1	1	1	0	1	1	1	1	1	1	1	1	1	1	1	1	1	1	1	1	1	1	1	1
chr9	22822110	22823110	2	2	2	2	2	2	2	2	2	2	2	2	2	2	2	3	2	2	2	3	2	2	2	2	2	2	3	2	2	2	2	2	2	2	3	2	2	2	2	2	2	2	2	2	2	2	2
chr8	10341	11341	5	6	6	7	5	4	5	4	4	5	6	7	4	4	6	4	4	4	5	4	5	5	5	4	4	4	6	3	4	3	4	4	4	4	5	4	4	4	5	5	5	5	5	5	5	5	5
chr8	11341	12341	11	9	11	12	10	9	8	7	7	8	13	9	8	10	11	11	7	6	9	9	9	8	8	7	7	9	11	6	7	6	7	8	9	9	9	7	7	8	7	10	10	7	9	11	7	7	10
chr8	15341	16341	15	13	16	17	13	13	11	10	9	11	16	13	10	13	17	15	10	7	12	12	13	12	11	11	10	12	14	8	8	8	9	12	13	14	13	9	10	12	11	13	14	10	12	15	10	10	13
chr8	27549	28549	9	9	10	10	8	8	8	7	6	7	10	9	7	8	10	8	7	5	8	8	8	8	7	8	7	8	13	6	6	6	7	7	8	8	9	6	6	8	7	8	9	7	8	10	7	7	9
chr8	1227413	1229017	4	3	1	3	3	4	4	2	3	2	3	2	3	3	4	3	3	4	3	4	3	3	2	3	3	3	4	2	3	3	3	3	2	3	2	3	4	2	3	3	4	3	3	2	3	3	3
chr8	1227413	1229017	4	3	1	3	3	4	4	2	3	2	3	2	3	3	4	3	3	4	3	4	3	3	2	3	3	3	4	2	3	3	3	3	2	3	2	3	4	2	3	3	4	3	3	2	3	3	3
chr8	4282765	4283765	2	2	2	2	3	2	2	2	2	2	2	2	2	2	2	2	2	2	2	2	2	2	2	2	2	2	3	2	2	2	2	2	2	2	2	2	2	2	2	2	2	2	2	2	2	2	2
chr8	6064981	6066133	2	2	2	2	2	2	2	2	2	2	2	2	2	2	2	2	2	2	2	2	2	2	2	2	2	2	2	2	2	2	2	2	2	2	2	2	2	2	2	2	2	2	2	2	2	2	2
chr8	6098354	6099808	2	2	1	2	2	2	1	2	2	1	2	2	2	2	2	2	2	2	2	2	2	1	3	2	2	2	1	2	2	2	2	2	2	2	1	2	2	2	2	2	2	2	2	2	2	3	2
chr8	8030363	8031363	10	9	12	17	15	14	19	13	11	13	15	17	12	12	19	16	17	14	19	17	13	17	12	14	16	15	15	11	13	13	15	17	17	15	14	11	11	19	10	5	8	8	9	18	10	7	12
chr8	8033009	8034009	9	9	12	17	15	14	19	14	11	13	16	18	11	11	19	17	17	13	18	16	13	16	11	14	15	15	12	10	13	13	15	18	16	15	13	12	12	19	11	5	7	8	9	17	11	6	11
chr8	8034009	8035055	9	8	11	18	17	13	19	13	11	13	17	17	12	13	20	18	16	15	19	15	14	18	12	13	15	15	17	11	13	15	14	17	18	15	14	12	13	21	11	8	8	10	10	16	11	7	13
chr8	8035055	8036055	13	13	14	22	20	17	20	17	11	17	18	22	14	17	24	20	21	17	24	18	15	20	16	17	17	16	27	14	16	17	17	19	25	18	18	12	17	24	11	11	14	12	15	20	12	9	18
chr8	8052186	8053186	13	10	14	19	21	17	22	17	11	15	21	19	15	16	24	17	22	19	24	18	14	20	18	15	14	18	32	16	15	16	18	15	22	17	16	15	15	25	12	11	14	14	14	18	10	11	17
chr8	9611257	9612257	9	6	7	8	12	6	8	8	5	7	8	8	7	8	8	8	6	6	7	8	9	6	6	5	5	6	10	6	5	6	6	13	18	6	7	7	7	15	6	6	8	6	6	8	6	6	10
chr8	10773167	10774167	3	3	3	2	3	2	3	2	3	3	3	2	2	2	3	3	3	3	2	3	3	3	3	3	3	3	3	3	3	3	3	3	3	3	3	3	3	3	3	3	3	3	3	3	2	3	2
chr8	18518035	18519703	2	2	2	2	2	2	2	1	2	2	2	2	3	2	2	2	2	2	2	2	2	2	2	2	2	2	1	3	2	2	2	2	2	2	2	2	2	2	2	2	2	2	3	2	2	2	1
chr8	18556559	18557559	2	2	2	2	2	2	2	2	2	2	2	2	2	2	2	2	2	2	2	2	2	2	2	2	3	2	1	2	2	2	2	2	2	2	2	2	2	2	2	2	2	2	2	2	2	2	2
chr8	28742175	28745762	9	8	9	10	9	8	9	9	7	8	10	10	7	9	9	9	7	6	8	7	8	8	8	8	7	8	14	7	7	7	7	7	8	9	10	8	7	7	7	8	8	9	8	9	7	8	9
chr8	28745762	28746762	19	23	21	24	20	20	20	18	18	19	21	23	16	21	23	19	17	16	19	18	21	21	18	21	17	20	34	16	18	17	18	19	19	22	22	17	17	16	18	19	19	19	21	23	19	18	22
chr8	28751839	28752839	30	24	30	33	24	27	24	23	15	19	31	31	16	22	28	27	21	13	21	23	30	26	16	18	20	19	39	13	16	15	16	21	21	24	25	22	16	27	19	21	27	19	21	27	20	17	31
chr7	7446	8550	20	19	16	16	14	14	15	15	12	12	18	18	10	13	21	18	15	12	14	19	17	17	15	16	19	17	19	13	12	12	13	18	19	20	18	14	11	15	15	16	18	17	17	13	12	11	17
chr7	10927	12220	8	10	8	10	8	8	7	9	7	8	9	11	8	9	11	8	7	6	8	7	9	11	9	8	9	9	12	8	7	7	8	8	7	10	9	9	7	8	8	8	9	7	8	9	7	8	12
chr7	135590	136653	2	2	2	2	2	2	2	2	3	2	2	2	2	2	2	2	2	2	2	2	2	2	3	3	2	2	2	2	2	2	2	2	2	2	2	3	2	2	2	2	3	2	2	3	2	3	2
chr7	8747579	8748620	5	7	4	10	7	6	4	6	5	7	11	6	7	6	7	7	4	3	8	4	5	4	7	6	6	4	14	4	4	6	6	6	5	4	5	6	4	5	6	6	5	5	5	7	5	6	6
chr7	8750748	8752347	6	9	4	13	8	7	4	6	6	9	14	7	9	7	9	7	5	3	9	5	5	5	10	7	8	5	18	6	5	7	7	7	5	4	5	7	5	5	9	7	6	6	6	8	6	7	7
chr7	10204233	10205346	3	5	2	6	4	4	3	4	3	5	7	4	5	3	4	5	3	3	6	3	3	2	6	4	4	3	11	3	2	4	4	4	3	3	3	4	3	3	4	4	3	3	3	4	3	3	5
chr7	10206346	10207945	6	8	4	11	7	7	3	5	5	8	13	6	8	7	8	6	4	3	8	5	4	4	10	6	7	5	14	5	5	7	6	6	4	4	5	6	5	5	8	7	5	6	5	7	5	7	7
chr7	11045735	11046767	2	3	2	2	2	2	2	2	2	2	2	2	2	1	3	2	2	2	2	2	2	2	2	2	2	2	2	2	2	2	2	2	2	2	2	2	2	2	2	2	2	1	2	2	2	1	1
chr7	15763607	15764638	2	2	2	2	2	2	2	2	2	2	2	2	2	2	2	2	2	2	2	1	2	2	2	2	2	2	2	2	2	2	2	2	2	2	2	2	2	2	2	2	2	2	2	2	2	2	2
chr7	15805294	15806294	2	2	2	2	2	2	2	2	2	2	2	2	2	2	2	2	2	2	2	1	2	2	2	2	2	2	2	2	2	2	2	2	1	2	2	2	2	2	2	2	2	2	2	2	2	2	2
chr7	15805294	15806294	2	2	2	2	2	2	2	2	2	2	2	2	2	2	2	2	2	2	2	1	2	2	2	2	2	2	2	2	2	2	2	2	1	2	2	2	2	2	2	2	2	2	2	2	2	2	2
chr7	21554997	21555997	2	3	2	2	2	2	2	2	3	2	3	3	2	3	3	3	2	2	3	3	2	2	2	2	2	2	3	2	2	2	2	3	3	2	2	3	2	3	2	2	2	2	2	2	2	2	2
chr7	21555997	21557045	2	2	2	2	2	2	2	2	2	2	2	2	2	2	2	2	2	2	2	2	2	2	2	2	2	2	2	2	2	2	2	2	2	2	2	2	2	2	2	2	2	2	2	2	2	2	2
chr7	21565096	21566096	2	2	2	3	2	2	2	2	2	2	2	2	2	3	3	3	2	2	2	3	2	2	2	2	2	2	4	2	2	2	3	3	3	2	2	2	2	2	2	2	2	2	2	3	2	2	2
chr7	21977974	21978974	3	2	2	2	2	2	2	2	2	2	2	2	2	3	2	3	2	2	3	2	2	2	2	2	2	3	3	2	2	2	2	3	3	2	3	2	2	2	3	2	2	2	2	3	2	3	2
chr7	22057923	22058959	2	1	2	2	2	2	2	2	2	2	2	2	2	2	2	1	2	2	2	2	2	2	2	2	2	2	2	2	2	2	2	2	2	2	2	2	2	1	2	2	2	2	2	2	2	2	2
chr7	22145909	22146909	2	2	2	2	2	2	2	3	2	2	2	2	2	2	1	2	2	2	2	2	2	2	2	2	2	2	2	2	2	2	2	2	2	2	2	2	2	2	2	2	2	2	2	2	2	2	2
chr7	22151229	22152442	2	2	2	1	2	2	2	2	2	2	2	2	2	2	2	2	2	2	1	2	2	2	2	2	2	2	2	2	2	2	2	2	2	2	2	2	2	2	2	2	2	2	2	2	2	2	2
chr7	36216246	36221512	9	8	9	9	8	7	8	8	7	7	9	9	7	8	8	8	7	6	7	7	8	7	8	8	7	8	13	7	7	7	7	7	7	8	10	7	7	6	7	8	8	9	8	8	7	8	9
chr7	36226001	36227470	39	35	44	46	35	30	28	24	17	23	32	33	20	26	37	34	23	17	26	30	31	29	24	24	26	29	58	17	20	19	20	30	34	28	34	22	19	29	24	29	31	21	30	38	24	23	37
chr7	36227470	36228506	39	31	40	41	31	32	30	30	20	25	40	41	22	29	35	35	26	17	27	31	40	33	19	23	24	24	54	16	20	19	19	26	29	33	30	26	20	35	23	27	34	24	26	36	27	21	42
chr6	12058	13058	9	9	10	12	8	8	7	7	7	8	9	11	6	7	13	15	12	8	12	11	11	13	13	9	9	12	16	8	9	9	8	13	8	11	8	8	8	9	9	8	10	10	10	10	11	13	16
chr6	3201891	3202891	18	18	25	32	15	14	18	11	17	26	23	21	16	26	18	18	14	13	18	19	18	18	15	14	16	20	40	9	13	13	14	20	17	21	12	11	15	12	10	13	14	16	17	14	15	16	16
chr6	3202891	3203891	20	21	29	32	15	17	21	16	20	23	26	25	19	24	19	18	14	15	19	19	22	25	15	15	21	23	36	10	16	18	16	24	16	26	14	12	14	12	10	18	18	15	21	16	18	18	27
chr6	3209467	3210467	27	28	39	48	21	21	28	18	26	39	36	34	26	41	26	26	20	19	25	28	27	28	21	21	26	30	63	13	19	20	21	30	23	31	19	16	23	16	14	21	22	25	26	22	23	24	24
chr6	3210467	3211467	19	19	26	32	15	15	19	16	19	23	24	22	17	23	17	15	13	14	16	16	21	24	15	15	19	23	37	10	14	17	14	22	14	26	11	12	14	12	9	16	16	14	19	14	17	18	26
chr6	3217341	3218341	21	21	30	38	16	16	22	13	21	32	27	26	21	33	19	19	15	15	18	21	22	22	17	17	20	25	42	10	15	16	16	24	18	23	14	13	19	13	11	16	17	19	21	17	18	19	18
chr6	3232287	3234662	8	9	10	13	7	6	8	6	7	9	10	9	7	10	8	8	7	6	8	9	7	8	6	6	8	8	20	4	6	6	7	9	7	11	6	5	6	5	5	7	6	7	8	6	7	7	9
chr6	3234662	3235662	25	25	36	43	18	19	25	16	24	35	33	30	25	37	23	22	17	17	23	26	24	25	19	18	25	27	47	12	18	19	19	28	21	25	17	14	21	14	12	19	20	22	23	20	21	21	19
chr6	3235662	3236662	22	22	29	33	17	17	21	19	19	23	27	26	19	23	19	19	15	16	19	19	20	25	16	16	21	23	42	11	16	18	17	24	17	26	13	13	14	12	10	19	17	15	22	15	19	19	29
chr6	5481291	5482609	10	11	9	11	6	7	10	5	13	10	15	15	12	11	12	10	10	10	12	12	6	9	7	7	10	7	11	6	8	9	10	9	5	9	9	9	7	5	8	14	7	11	9	6	9	10	11
chr6	5482609	5483943	18	20	22	24	11	14	17	13	17	17	25	22	17	17	20	18	17	16	22	21	15	19	12	11	17	14	28	10	14	16	15	17	11	17	14	11	11	8	11	21	13	16	20	12	18	17	26
chr6	5483943	5484943	15	16	19	20	9	11	13	9	15	14	22	22	14	17	20	17	14	13	20	21	14	17	9	10	16	11	22	8	13	12	13	17	13	16	15	9	11	8	10	18	12	13	14	12	13	12	15
chr6	5484943	5486608	17	17	21	22	10	12	15	10	16	17	24	23	15	19	20	18	17	14	21	23	12	15	9	9	16	10	33	8	12	12	14	17	12	16	15	11	13	8	11	19	11	17	15	12	18	15	17
chr6	5487655	5493285	6	6	8	8	5	5	6	3	6	7	9	9	6	7	9	7	6	5	9	9	4	6	4	3	6	5	9	4	5	4	6	7	5	6	6	5	5	3	5	7	5	7	6	5	6	5	4
chr6	10527518	10528518	2	2	2	2	2	2	2	2	2	2	2	1	2	2	2	2	2	2	2	2	2	2	2	2	2	2	2	2	1	2	2	2	2	2	2	2	2	2	2	2	2	2	2	2	2	2	2
chr6	11332068	11333221	2	2	2	2	1	2	2	2	2	2	2	2	2	2	2	2	2	2	2	2	2	1	2	2	2	2	2	2	2	2	2	1	2	2	2	1	2	2	2	2	2	2	2	2	2	2	2
chr6	12932256	12933256	1	2	2	2	2	2	2	2	2	2	2	2	2	2	1	2	2	2	2	2	2	2	2	2	2	2	2	2	1	2	2	3	2	2	2	2	2	2	2	2	2	2	2	2	2	2	2
chr6	12937383	12938383	2	2	2	2	2	2	2	2	2	2	2	2	2	2	2	2	2	2	2	2	2	2	2	2	2	1	2	2	2	2	2	2	2	2	2	2	2	2	2	2	2	2	1	2	2	2	2
chr6	14134727	14136006	2	2	2	2	2	2	2	2	2	2	1	1	2	2	2	2	2	2	2	2	2	2	2	2	2	2	1	2	2	2	2	2	2	2	1	2	2	2	2	2	2	2	2	2	2	2	2
chr6	14137399	14138502	1	1	1	1	1	2	2	1	2	1	1	1	2	1	1	1	1	1	1	0	2	1	1	1	1	1	0	1	1	1	1	1	1	2	1	1	2	1	1	2	2	2	2	1	2	2	1
chr6	14144150	14145150	2	2	2	2	2	2	2	2	2	2	2	2	2	2	2	2	2	2	2	2	2	2	2	2	2	2	1	2	2	2	2	2	1	2	1	2	2	2	1	2	2	2	2	2	2	2	2
chr6	16969208	16972166	2	2	2	2	2	2	2	2	2	2	2	2	2	2	2	2	2	2	1	2	2	2	2	2	2	2	1	2	1	2	2	2	1	2	2	2	2	2	2	2	2	2	2	2	2	2	2
chr6	16969208	16972166	2	2	2	2	2	2	2	2	2	2	2	2	2	2	2	2	2	2	1	2	2	2	2	2	2	2	1	2	1	2	2	2	1	2	2	2	2	2	2	2	2	2	2	2	2	2	2
chr6	19003492	19004492	4	4	4	4	4	4	4	3	3	4	4	4	4	3	4	4	4	4	3	5	4	3	5	3	4	4	4	4	4	4	4	4	4	4	4	4	4	4	4	4	4	4	3	4	4	4	3
chr6	19014111	19018783	4	4	4	4	4	4	5	4	4	4	4	4	4	4	4	4	4	4	4	4	4	4	4	4	4	4	4	3	4	5	5	4	4	4	4	4	4	4	4	4	3	4	4	4	4	5	4
chr6	21823648	21824648	2	2	2	2	2	2	2	3	2	2	2	2	2	3	3	3	3	2	3	3	2	2	2	3	3	2	4	2	3	2	2	2	3	2	3	3	2	2	2	2	2	2	2	2	2	2	2
chr6	21858228	21859334	2	2	2	2	2	2	2	2	2	2	2	2	2	2	2	2	2	2	2	2	2	2	2	2	2	2	2	2	2	2	2	2	2	2	2	2	3	2	2	2	2	2	2	2	2	2	2
chr6	21865451	21866527	2	2	2	2	2	2	2	2	2	2	2	2	2	2	2	3	2	2	2	2	2	2	3	2	2	2	2	2	2	2	3	2	2	2	2	2	2	2	2	2	2	2	2	2	2	2	2
chr6	33090522	33091593	1	1	1	1	1	2	1	1	1	1	1	1	1	1	1	1	1	1	1	1	1	2	1	1	1	1	1	1	1	1	1	1	1	1	1	1	1	1	1	1	1	1	1	2	1	1	2
chr5	198514	199715	2	2	2	2	2	2	2	2	2	2	2	2	2	2	2	2	2	2	2	2	2	2	2	2	2	2	1	2	2	2	2	2	2	2	2	2	2	2	2	2	2	2	2	1	2	2	2
chr5	198514	199715	2	2	2	2	2	2	2	2	2	2	2	2	2	2	2	2	2	2	2	2	2	2	2	2	2	2	1	2	2	2	2	2	2	2	2	2	2	2	2	2	2	2	2	1	2	2	2
chr5	5734906	5735906	18	25	23	23	16	15	18	13	15	17	28	28	20	25	22	19	22	17	26	27	19	21	20	21	23	24	28	22	24	14	15	34	31	16	21	18	22	27	25	16	25	14	21	27	17	17	9
chr5	5774226	5775226	21	31	29	27	19	16	21	10	19	23	30	28	25	30	27	24	25	18	31	34	22	24	20	24	28	27	33	23	27	16	17	45	42	21	24	19	25	31	28	18	29	15	22	33	18	23	9
chr5	5801434	5802849	21	31	27	26	17	17	21	10	19	21	33	31	24	31	29	23	26	19	32	36	23	27	20	25	27	27	28	25	28	16	17	44	41	22	26	19	27	30	30	19	30	15	25	34	19	22	7
chr5	5828227	5829633	21	30	24	24	11	13	17	12	14	14	23	22	19	21	26	27	21	18	23	29	19	21	16	21	21	22	22	22	23	13	15	30	34	15	24	14	17	32	26	18	20	16	16	29	16	23	8
chr5	10883782	10884782	3	3	3	2	2	3	3	2	2	2	3	2	3	2	3	3	3	3	3	3	3	3	3	3	4	3	3	3	3	2	3	3	3	3	3	3	3	3	3	3	3	2	2	3	3	2	2
chr5	14310946	14311946	22	26	26	29	23	19	22	24	18	20	32	24	17	21	26	28	21	18	19	23	20	20	18	18	21	19	40	15	20	17	16	31	28	19	22	18	14	26	24	19	20	21	20	22	20	19	20
chr5	14334985	14335985	22	27	24	29	22	20	23	26	22	17	35	25	19	21	28	26	23	19	18	22	21	22	18	19	21	20	44	17	20	18	19	30	25	21	22	21	15	27	26	20	20	26	20	24	19	22	20
chr5	16357176	16358350	2	2	2	1	2	2	2	2	2	2	2	2	2	2	2	2	2	2	2	2	3	2	1	2	2	2	1	2	2	2	2	2	2	2	2	2	2	1	2	2	2	2	2	2	2	2	2
chr5	17763325	17764398	2	2	2	2	2	2	2	2	2	2	2	2	2	2	2	2	2	2	2	2	2	2	2	2	2	2	2	2	2	2	2	2	2	2	2	2	2	2	2	2	2	2	2	2	2	2	2
chr5	23819291	23820358	2	2	2	2	2	2	2	1	2	2	2	1	2	2	2	2	2	2	2	2	2	2	2	2	2	2	1	2	2	2	2	2	2	2	2	2	2	2	2	2	2	3	2	2	2	2	2
chr5	23879034	23880065	2	2	2	1	2	2	2	1	2	2	2	1	2	2	2	2	2	2	2	1	2	2	3	2	2	2	1	2	2	2	2	1	2	2	2	2	3	2	2	2	2	2	2	1	3	2	2
chr5	32813197	32814243	2	2	2	2	2	2	2	2	2	2	2	2	2	2	1	1	2	2	2	1	2	2	2	2	2	2	2	2	2	2	2	1	2	2	2	2	2	2	2	2	2	2	2	2	2	2	2
chr5	44192301	44193301	2	2	3	2	2	2	2	2	2	2	1	2	2	2	2	3	2	3	2	2	2	2	2	2	2	2	3	2	2	3	2	2	2	2	2	2	3	2	2	2	2	2	2	3	3	2	2
chr5	50603284	50604284	2	2	2	2	2	2	2	2	2	2	2	2	2	2	2	2	2	2	2	2	2	2	2	2	2	2	2	2	2	2	2	2	2	2	2	2	2	2	2	2	2	2	2	2	2	2	2
chr5	58801097	58802190	11	9	11	14	15	9	12	12	11	5	6	7	5	10	14	17	14	6	16	17	12	13	7	10	11	8	15	7	8	8	7	12	13	11	12	8	15	14	10	6	11	6	8	11	8	7	12
chr5	58802190	58803190	12	10	12	12	13	8	11	9	12	9	9	11	8	14	14	15	15	8	15	15	15	14	9	14	9	9	16	7	8	7	11	11	12	13	14	8	14	12	11	6	9	6	6	12	8	7	6
chr5	58819718	58820718	12	10	12	13	16	9	12	11	12	6	6	7	5	11	14	18	15	7	16	17	13	14	7	12	10	9	16	7	9	8	8	13	13	12	13	8	17	14	11	6	10	6	7	10	8	7	10
chr5	58820718	58821718	9	9	9	10	11	9	10	9	10	7	7	9	7	10	12	12	13	7	12	13	15	13	7	11	8	7	10	6	7	7	11	8	10	13	12	8	11	10	10	5	8	5	5	11	7	6	5
chr5	58933362	58934685	1	1	1	1	1	1	1	2	1	1	1	1	1	1	1	1	1	2	1	1	1	2	1	1	1	1	1	1	1	1	1	1	1	1	1	1	1	1	1	1	1	1	1	1	1	1	2
chr4	1616658	1617658	2	3	2	3	2	2	2	2	2	2	3	2	2	2	2	3	3	2	3	3	2	2	2	2	2	2	3	2	2	2	2	3	2	2	2	2	2	3	2	2	3	2	3	2	2	2	2
chr4	1616658	1617658	2	3	2	3	2	2	2	2	2	2	3	2	2	2	2	3	3	2	3	3	2	2	2	2	2	2	3	2	2	2	2	3	2	2	2	2	2	3	2	2	3	2	3	2	2	2	2
chr4	1617658	1618658	2	2	2	2	2	2	2	2	2	2	2	2	2	2	2	2	2	2	2	2	2	2	2	2	2	2	2	2	2	2	2	2	2	2	2	2	2	2	2	2	2	2	2	2	2	2	2
chr4	2109275	2110275	2	2	2	2	2	3	2	2	2	2	2	2	2	2	3	2	2	2	2	2	2	2	2	2	3	2	3	3	2	3	2	3	3	2	2	2	2	2	2	2	2	2	2	2	2	2	3
chr4	2460902	2461902	2	2	2	2	2	2	2	2	2	2	2	2	2	2	2	2	2	2	2	2	2	2	2	2	2	2	3	2	2	2	3	2	2	2	2	2	2	2	2	2	2	2	2	2	2	2	2
chr4	4400502	4402779	2	2	1	2	2	2	2	2	2	2	2	2	2	2	2	2	2	2	2	2	1	2	1	2	2	2	1	2	2	2	2	1	2	1	2	2	2	2	2	2	2	2	2	2	2	2	2
chr4	4521623	4522623	3	2	2	2	3	2	2	2	2	2	2	2	2	2	2	2	2	2	2	3	2	2	2	2	2	2	2	2	2	2	2	2	2	2	2	2	2	2	2	3	2	3	2	2	2	2	2
chr4	7490031	7491031	3	2	2	3	3	2	2	2	2	2	1	2	2	2	2	2	2	2	2	2	2	2	1	2	2	3	2	2	2	2	2	2	2	2	2	2	3	2	2	3	3	2	2	2	2	3	2
chr4	18703205	18707569	1	1	1	1	1	1	1	1	1	1	1	1	1	1	1	1	1	1	1	1	1	1	1	1	1	1	2	1	1	1	1	1	1	1	1	1	1	1	1	1	1	1	1	2	1	1	2
chr4	25889929	25891266	1	1	1	1	1	1	1	2	1	1	1	2	1	1	1	1	1	1	2	1	2	2	1	1	1	1	2	1	1	1	1	1	1	2	1	1	1	1	2	1	1	2	1	1	1	1	1
chr4	35292813	35293813	2	2	2	1	2	2	2	2	2	2	2	2	2	2	2	2	2	2	2	2	2	2	2	2	2	2	2	2	2	3	2	2	2	2	2	2	2	2	2	2	2	2	2	2	2	2	2
chr4	43487751	43489463	8	8	8	11	9	5	10	8	4	6	9	6	7	6	10	13	5	4	7	5	7	6	7	11	10	7	23	8	12	6	10	8	7	7	7	4	7	8	9	5	7	6	7	7	5	7	5
chr4	43489463	43490463	14	11	13	20	16	8	16	14	6	8	11	9	8	8	16	18	8	7	11	8	10	9	11	15	16	12	35	10	18	9	14	13	11	10	12	7	8	12	12	7	11	8	11	10	8	8	11
chr4	61541316	61542489	2	2	2	2	2	2	2	2	2	2	2	2	2	2	2	2	2	2	2	2	2	2	2	2	2	2	2	2	2	2	2	2	2	2	2	2	2	2	2	2	2	2	1	2	1	2	2
chr4	61824563	61826329	2	2	2	2	2	2	2	2	1	2	2	2	2	2	2	2	2	2	2	2	2	2	2	2	2	2	2	2	2	2	2	2	2	2	2	2	2	2	2	2	2	2	2	2	2	2	2
chr4	63539797	63540797	2	2	2	2	3	2	2	2	2	2	2	2	1	2	2	2	2	2	2	2	2	2	2	2	2	2	3	2	2	2	2	1	2	2	2	2	2	2	2	2	2	3	2	2	2	2	2
chr4	67550510	67551510	2	2	2	2	2	2	2	2	2	2	2	2	2	2	2	2	2	2	2	2	2	2	2	2	2	2	2	2	2	2	2	2	2	2	2	2	2	2	2	2	2	2	2	2	2	2	2
chr4	78395211	78396211	2	2	2	2	2	2	2	2	2	2	2	2	2	2	2	2	2	2	2	2	2	2	2	2	2	2	2	2	2	2	2	2	2	2	2	2	2	2	2	2	2	2	2	2	2	2	2
chr4	85229057	85231539	7	6	6	6	6	3	7	9	3	6	5	5	4	6	4	8	7	6	8	4	7	6	5	6	6	4	7	3	5	3	6	7	7	6	5	5	8	4	4	6	7	6	6	6	5	6	5
chr4	85259289	85260349	5	5	7	5	5	5	6	7	2	6	6	5	3	5	3	7	7	5	8	5	7	8	6	4	5	5	7	3	5	4	4	9	4	6	5	5	6	4	4	6	7	6	5	6	5	6	6
chr4	85259289	85260349	5	5	7	5	5	5	6	7	2	6	6	5	3	5	3	7	7	5	8	5	7	8	6	4	5	5	7	3	5	4	4	9	4	6	5	5	6	4	4	6	7	6	5	6	5	6	6
chr4	85259289	85260349	5	5	7	5	5	5	6	7	2	6	6	5	3	5	3	7	7	5	8	5	7	8	6	4	5	5	7	3	5	4	4	9	4	6	5	5	6	4	4	6	7	6	5	6	5	6	6
chr4	85260349	85261349	2	3	3	3	1	1	3	3	1	3	2	2	1	3	1	4	3	3	4	1	3	4	2	1	2	2	2	1	2	2	1	4	2	1	2	1	4	1	1	2	4	2	2	2	2	2	2
chr4	85260349	85261349	2	3	3	3	1	1	3	3	1	3	2	2	1	3	1	4	3	3	4	1	3	4	2	1	2	2	2	1	2	2	1	4	2	1	2	1	4	1	1	2	4	2	2	2	2	2	2
chr4	85260349	85261349	2	3	3	3	1	1	3	3	1	3	2	2	1	3	1	4	3	3	4	1	3	4	2	1	2	2	2	1	2	2	1	4	2	1	2	1	4	1	1	2	4	2	2	2	2	2	2
chr4	89188898	89190550	2	2	2	2	2	2	1	2	2	2	2	2	2	2	2	2	2	2	2	1	2	2	2	2	2	2	2	2	2	2	2	2	2	1	2	2	2	2	2	2	1	1	2	1	2	2	2
chr4	89197659	89198893	2	2	2	2	2	2	2	2	2	2	2	2	2	2	2	1	2	3	2	2	2	2	2	2	2	2	1	2	2	2	2	2	2	2	2	2	2	2	2	2	2	2	2	2	2	2	2
chr3	4264394	4265394	2	2	2	2	2	2	2	2	2	2	2	2	2	2	2	2	2	2	3	2	2	2	2	2	2	2	2	2	2	2	2	3	2	2	2	2	2	2	2	2	2	2	2	2	2	2	2
chr3	5633074	5634144	1	1	2	2	1	1	1	2	1	1	2	2	1	1	1	1	1	1	1	1	1	1	1	1	1	1	1	1	1	1	1	1	1	1	1	1	1	1	1	1	1	1	1	1	1	1	2
chr3	10500913	10501950	1	1	1	1	1	1	1	1	1	1	1	1	1	1	1	1	1	1	1	1	2	1	1	1	1	1	2	1	1	1	2	2	1	1	1	1	1	1	1	1	1	1	1	1	1	2	1
chr3	11561329	11562364	1	2	1	1	1	2	1	1	1	1	1	2	1	1	1	1	1	1	1	1	1	2	1	1	1	1	1	1	1	1	1	1	1	2	2	1	1	1	1	1	2	1	2	1	1	1	2
chr3	15954174	15955174	2	2	2	2	2	3	3	2	3	2	2	2	3	2	3	3	3	3	3	3	2	2	3	3	3	2	3	2	2	3	2	3	3	2	2	2	2	2	3	2	2	2	2	2	2	2	2
chr3	16395406	16397066	2	2	2	2	2	1	2	2	2	2	1	1	2	2	2	1	2	2	2	2	2	2	1	2	2	2	2	2	2	2	2	2	2	2	2	1	2	2	2	2	2	2	2	1	2	1	1
chr3	24710481	24711481	2	2	2	2	2	2	2	2	2	2	2	2	2	2	3	3	2	2	2	2	2	2	2	2	2	2	2	2	2	2	2	2	2	2	2	2	2	2	2	1	2	1	2	2	2	1	2
chr3	25246370	25247370	2	2	2	2	2	2	2	2	2	3	2	2	2	2	2	2	2	2	2	2	2	2	2	2	2	2	1	2	2	2	2	2	2	2	3	2	2	2	2	2	2	2	2	2	2	2	2
chr3	30782441	30783441	3	3	3	3	3	4	2	3	3	3	3	3	3	3	3	3	3	3	3	3	2	2	2	3	2	3	3	2	3	3	2	3	2	3	3	3	3	3	3	3	3	3	3	3	3	3	2
chr3	33492144	33493144	4	3	4	5	4	3	4	4	3	4	5	4	4	4	4	5	4	4	5	5	4	3	4	4	4	3	6	3	3	4	3	5	4	4	4	4	3	4	5	3	4	3	5	4	4	4	3
chr3	56083791	56084791	2	3	2	2	2	2	2	2	2	2	2	2	2	2	2	3	2	2	3	2	2	2	3	2	2	2	3	2	3	2	2	2	2	2	2	2	2	2	2	2	2	2	2	2	2	1	3
chr3	66908602	66909873	2	2	2	2	2	2	2	2	2	2	2	2	2	2	2	2	2	2	2	2	2	2	2	2	2	2	2	2	2	2	2	2	1	2	2	2	2	2	2	2	2	2	2	2	2	2	1
chr3	72709287	72710428	1	1	1	1	1	1	1	1	1	1	1	1	1	1	1	1	1	1	1	1	1	2	1	1	1	1	1	1	1	1	1	1	1	2	1	1	1	2	1	1	1	1	1	1	1	1	1
chr3	80178851	80180480	1	1	1	1	1	1	1	1	2	1	1	1	1	1	1	1	1	1	1	1	1	1	1	1	1	1	0	1	1	1	1	1	1	1	1	1	1	1	1	1	1	1	1	1	1	1	1
chr3	92229009	92230279	1	1	2	1	1	1	1	2	1	1	1	2	1	1	1	1	1	1	1	2	1	1	1	1	1	1	1	1	1	1	1	1	2	2	2	1	1	1	1	1	1	1	1	1	1	1	1
chr3	100211216	100212313	3	2	4	4	3	3	3	3	3	4	3	3	4	4	5	5	4	3	3	3	3	3	3	5	2	3	3	3	3	3	2	3	4	3	2	4	3	2	3	3	3	3	2	3	3	3	2
chr3	101220187	101221187	9	7	12	20	11	7	10	10	9	11	7	6	13	12	19	18	11	10	13	13	11	8	8	16	7	8	21	7	11	6	7	10	15	7	7	8	7	8	9	8	7	8	5	7	7	7	7
chr3	101389446	101390654	13	9	16	30	17	8	14	17	12	15	10	6	17	16	29	29	16	14	19	18	15	8	10	22	9	9	36	8	15	8	8	14	21	9	9	10	8	10	12	11	9	9	7	9	9	8	9
chr3	101397829	101398939	9	6	10	17	9	6	11	11	10	9	6	7	12	12	17	17	11	10	12	10	9	7	7	16	6	7	18	6	9	5	6	7	12	7	5	8	5	7	8	8	8	8	5	6	7	7	6
chr3	101398939	101399984	4	3	4	7	4	3	4	5	3	3	3	3	4	3	6	4	5	5	5	5	3	3	3	5	3	3	7	3	4	3	3	2	4	3	3	3	3	3	3	4	4	4	3	3	3	4	3
chr3	101399984	101401067	3	2	4	7	3	2	4	4	3	3	2	2	4	3	6	4	4	5	5	3	3	2	2	7	2	2	7	2	4	2	1	2	3	2	2	3	2	2	2	3	3	3	2	2	3	3	2
chr3	101401067	101402067	4	2	3	6	4	2	4	4	3	3	2	2	5	4	7	4	5	6	5	4	3	2	2	5	2	2	5	2	5	3	3	2	3	2	2	4	2	3	3	3	2	3	2	1	3	3	1
chr3	101402067	101406680	3	2	3	5	3	2	4	3	3	3	2	2	3	3	5	3	5	5	5	3	3	2	2	5	2	2	5	1	3	2	2	2	2	2	2	3	2	2	2	2	2	3	2	2	3	3	2
chr3	101408062	101409109	3	2	4	6	4	1	4	5	2	2	2	2	3	3	5	3	4	5	4	2	3	2	2	5	2	2	5	2	3	2	1	2	3	2	2	3	1	2	3	2	2	3	2	2	2	3	2
chr3	101409109	101410293	3	2	3	5	4	2	4	3	3	3	2	2	3	2	6	3	5	5	4	3	2	2	2	4	2	2	6	2	4	2	2	2	3	2	2	3	2	2	3	3	3	3	2	3	3	3	2
chr3	101421952	101422952	4	3	4	6	4	3	4	5	3	3	3	3	4	3	6	4	5	4	5	5	4	3	3	6	3	3	6	3	4	3	3	3	4	3	3	3	3	3	4	4	5	4	3	3	3	4	3
chr3	104522806	104524804	2	2	2	2	2	2	2	2	2	2	2	2	2	2	2	2	2	2	2	2	2	2	2	2	2	2	1	2	2	2	2	2	2	2	2	2	2	1	2	2	2	2	2	2	2	2	2
chr3	104525252	104526482	2	2	2	2	2	2	2	2	2	2	2	2	2	2	2	2	2	2	2	2	2	2	2	2	2	2	2	2	2	2	2	2	2	2	2	2	2	2	2	2	2	2	2	2	2	2	2
chr3	104777379	104778503	2	2	2	2	2	2	2	2	2	2	2	2	2	2	2	2	2	2	2	2	2	2	1	2	2	2	2	2	2	2	2	2	1	2	2	2	2	2	2	2	2	2	2	2	2	2	2
chr3	110432330	110433330	12	16	13	19	18	11	13	13	11	12	17	20	14	18	22	25	17	14	25	22	17	18	23	15	17	18	43	13	18	18	18	21	19	12	17	13	17	19	16	16	13	13	17	25	16	15	22
chr3	110435372	110436372	72	118	86	143	133	86	99	110	71	88	93	124	103	114	140	162	122	103	187	158	106	136	140	101	114	120	255	87	131	127	135	165	131	66	113	82	115	132	118	98	92	84	111	158	114	91	163
chr28	722301	723519	2	2	1	2	2	2	2	2	2	2	2	2	2	2	2	2	2	2	2	2	2	2	2	1	2	2	2	2	2	2	2	2	2	2	3	2	2	2	2	2	2	1	2	2	2	1	2
chr28	736229	737229	2	2	2	1	2	2	2	2	2	2	1	2	2	2	2	2	3	2	2	2	2	2	2	2	2	2	2	2	2	2	2	2	1	2	2	2	2	2	2	2	2	2	1	2	2	2	2
chr28	967413	968999	2	2	2	1	2	2	2	2	2	2	2	2	2	2	2	2	2	2	2	2	2	2	2	2	2	2	1	2	2	2	1	2	2	2	2	2	2	2	2	2	2	2	2	2	2	2	2
chr28	976602	977602	2	2	2	2	2	2	2	2	2	2	2	2	2	2	2	2	2	2	2	2	2	2	2	2	2	2	2	2	2	2	2	2	2	2	2	2	2	2	2	2	2	2	2	2	2	2	2
chr28	1012504	1013504	2	2	2	3	2	2	2	2	2	2	2	2	2	2	3	2	2	2	2	2	3	2	2	2	2	2	1	2	2	2	2	2	3	2	2	2	2	2	2	2	2	2	2	2	2	2	2
chr28	2073452	2074452	2	2	2	2	2	2	2	2	2	1	2	2	3	2	2	1	1	2	2	2	2	2	2	3	2	2	2	2	2	2	2	2	2	2	2	2	2	2	2	2	2	2	2	2	2	2	2
chr28	2152008	2153792	2	2	2	2	2	2	2	1	2	2	2	2	2	2	2	1	2	2	2	1	2	2	2	2	2	2	2	2	2	2	2	2	2	2	2	2	2	2	2	2	2	2	2	2	2	2	2
chr28	2154838	2155838	2	3	2	2	2	2	2	3	2	2	2	2	2	2	2	2	2	2	1	2	2	2	2	2	2	2	1	2	2	2	2	2	2	2	2	2	2	2	2	2	2	2	2	2	2	2	3
chr28	3565171	3566217	2	2	2	1	1	2	1	2	2	2	2	2	2	2	2	2	2	2	2	2	2	2	2	2	2	2	2	2	1	2	2	2	2	2	2	2	2	2	2	2	2	2	1	2	2	2	2
chr28	3766945	3767945	2	2	2	2	3	2	2	2	2	2	2	2	2	2	3	3	3	3	3	3	2	2	2	3	2	2	3	3	2	2	2	3	3	2	2	2	3	3	2	3	2	2	2	2	3	2	2
chr28	4116462	4117462	3	3	3	3	3	3	3	3	3	3	2	3	2	3	3	3	3	3	3	3	3	3	3	3	4	3	2	3	2	3	3	3	3	2	2	2	3	3	3	3	2	3	3	2	3	3	2
chr28	4706845	4707845	2	2	2	2	2	2	2	2	2	1	2	2	2	1	2	2	2	1	1	1	2	2	2	2	2	2	3	2	2	1	2	1	1	2	2	2	1	2	1	2	2	2	2	2	2	2	2
chr28	4708845	4709845	2	2	2	2	2	2	2	2	2	2	2	2	2	2	2	1	2	2	2	1	2	2	2	2	2	2	2	2	2	2	2	1	1	2	2	2	2	1	2	2	2	2	2	3	2	2	2
chr28	4708845	4709845	2	2	2	2	2	2	2	2	2	2	2	2	2	2	2	1	2	2	2	1	2	2	2	2	2	2	2	2	2	2	2	1	1	2	2	2	2	1	2	2	2	2	2	3	2	2	2
chr28	4732474	4733474	2	2	2	2	2	2	2	2	2	2	2	2	2	2	2	2	2	2	2	2	2	2	2	2	2	2	2	2	2	2	2	2	2	2	2	2	2	2	2	2	2	2	2	2	2	2	2
chr27	28220	29220	9	12	11	17	16	11	11	10	9	9	18	17	9	17	18	20	7	10	19	19	13	17	21	10	11	11	25	10	9	8	9	16	14	9	10	6	8	13	13	10	7	8	12	16	8	8	9
chr27	1700591	1701702	2	2	2	2	2	2	2	2	2	2	2	2	2	2	2	2	2	2	2	2	2	2	2	2	2	2	2	2	2	2	2	2	2	2	2	2	2	2	2	2	2	2	2	2	2	2	2
chr27	1700591	1701702	2	2	2	2	2	2	2	2	2	2	2	2	2	2	2	2	2	2	2	2	2	2	2	2	2	2	2	2	2	2	2	2	2	2	2	2	2	2	2	2	2	2	2	2	2	2	2
chr27	1700591	1701702	2	2	2	2	2	2	2	2	2	2	2	2	2	2	2	2	2	2	2	2	2	2	2	2	2	2	2	2	2	2	2	2	2	2	2	2	2	2	2	2	2	2	2	2	2	2	2
chr27	2022748	2023748	3	4	3	4	3	3	3	3	3	4	4	4	3	5	4	4	4	3	4	4	3	4	4	3	4	3	4	3	3	3	3	4	4	3	4	3	3	4	4	3	3	3	4	4	3	3	3
chr27	3421828	3422946	2	2	1	2	2	2	2	2	2	2	2	2	2	2	2	1	2	2	2	1	2	2	2	2	2	2	1	2	2	2	2	2	2	2	2	2	2	2	2	2	2	2	2	2	2	2	2
chr27	3425946	3427078	2	2	2	2	2	2	2	2	2	2	2	2	2	2	2	2	2	2	2	2	2	2	2	2	2	2	2	2	2	2	2	2	2	2	2	2	2	2	2	2	2	2	2	2	2	2	2
chr27	3609479	3610479	2	2	2	2	2	2	2	2	2	2	2	2	2	2	1	1	2	2	1	1	2	2	2	2	1	2	1	2	2	2	2	1	1	2	2	2	2	2	2	2	2	2	2	1	2	2	2
chr27	3989756	3990826	1	1	2	2	2	1	2	2	2	2	2	2	2	2	1	2	2	2	2	2	2	2	2	2	2	2	2	2	2	2	2	2	2	2	2	2	2	2	2	2	2	2	2	1	2	2	2
chr27	3989756	3990826	1	1	2	2	2	1	2	2	2	2	2	2	2	2	1	2	2	2	2	2	2	2	2	2	2	2	2	2	2	2	2	2	2	2	2	2	2	2	2	2	2	2	2	1	2	2	2
chr27	5013154	5014213	2	2	2	2	3	2	2	2	2	2	3	3	2	2	2	2	2	2	3	2	2	3	2	2	2	2	3	2	2	2	2	2	2	2	2	2	3	2	2	2	2	2	3	2	2	2	2
chr27	5071695	5072695	3	3	3	3	3	3	3	2	2	3	3	3	3	3	4	4	3	3	4	3	3	3	3	3	4	3	5	3	3	2	3	3	4	3	3	3	3	3	3	2	2	2	2	3	2	2	2
chr26	484658	485658	1	1	1	1	1	2	1	2	1	1	1	1	2	1	1	1	1	1	1	1	2	2	1	1	1	1	0	1	1	1	1	1	1	1	1	1	1	1	1	1	1	1	1	1	1	2	1
chr26	4223302	4224590	2	2	2	2	2	2	2	2	2	2	2	2	2	2	2	2	2	2	2	3	2	2	2	2	2	2	2	2	1	2	2	2	2	2	2	2	2	2	2	2	2	2	2	2	2	2	2
chr26	4300057	4301057	2	2	2	2	2	2	2	2	2	2	2	2	2	2	2	2	2	2	2	2	2	2	2	2	2	2	2	2	2	2	2	2	2	2	2	2	2	2	2	2	2	2	2	2	2	2	2
chr26	4302090	4303157	2	2	2	2	2	2	2	2	2	2	2	2	2	2	2	2	2	2	2	2	2	2	2	2	2	2	1	2	2	2	2	2	1	2	2	2	2	2	2	2	2	2	2	2	2	2	2
chr26	4303157	4304504	2	2	2	2	2	2	2	2	2	2	2	2	2	2	2	2	2	2	2	2	2	2	2	2	2	2	2	2	2	2	2	2	2	2	2	2	2	2	2	2	2	2	2	1	2	2	2
chr26	4882603	4883603	2	2	2	2	2	2	2	2	2	2	2	2	2	2	2	2	2	2	2	2	2	2	2	2	2	2	3	2	2	2	2	2	2	2	3	2	2	2	2	2	2	2	2	2	2	2	2
chr26	4916362	4917362	2	2	2	2	2	2	2	2	2	2	2	2	2	2	2	2	2	2	2	2	2	2	2	2	2	2	2	2	2	2	2	2	3	2	2	2	2	2	2	2	2	2	2	2	2	2	2
chr26	5307387	5308992	2	2	2	2	2	2	2	2	2	2	2	2	2	2	2	2	2	2	2	2	2	2	2	2	2	2	2	2	1	2	2	1	2	2	2	2	2	2	2	2	2	2	2	2	2	2	2
chr26	5312031	5313031	3	2	2	2	2	2	2	2	2	2	2	2	2	2	2	2	2	2	2	2	2	2	2	3	2	2	3	2	2	2	2	2	3	2	2	2	2	2	2	2	2	2	2	2	2	2	2
chr25	409256	410419	2	2	2	1	2	2	2	2	2	2	2	2	2	2	2	2	2	2	2	1	2	2	2	2	2	2	2	2	2	2	2	1	1	2	2	2	2	2	2	2	2	2	2	2	2	2	2
chr25	413493	414493	2	2	2	2	2	2	2	2	2	2	2	2	2	2	2	2	2	2	1	2	2	2	2	2	2	2	2	2	2	2	3	1	2	2	2	2	2	2	2	2	2	1	2	2	2	2	2
chr25	737062	738841	2	2	2	2	2	2	2	2	2	1	2	2	2	1	2	2	2	2	1	2	1	2	2	2	2	2	2	2	2	2	2	2	2	2	2	2	2	2	2	2	2	2	2	2	2	2	2
chr25	914721	915721	12	13	14	17	12	12	16	16	11	13	17	16	12	16	20	20	15	15	20	22	19	20	15	14	15	14	25	12	13	11	11	17	27	18	14	11	11	11	15	14	14	15	13	17	11	13	16
chr25	917666	918666	13	15	15	19	14	13	16	18	13	15	20	19	14	20	23	24	18	17	22	25	18	21	17	18	17	15	27	14	16	14	14	18	27	20	14	13	12	13	16	15	14	16	16	21	12	16	17
chr25	921273	922273	13	15	18	20	13	12	16	15	13	13	20	19	14	19	23	24	17	15	21	23	15	18	15	16	16	16	28	13	15	13	12	18	31	19	16	13	14	13	16	15	15	16	16	20	13	17	14
chr25	927085	928085	12	14	17	19	12	11	15	14	10	13	18	16	11	16	18	21	14	12	19	20	14	17	13	14	15	15	24	11	14	11	11	16	29	16	15	10	12	12	13	13	14	13	13	17	12	12	13
chr25	945456	946456	7	8	8	9	8	7	8	8	6	7	10	9	7	9	11	12	9	8	10	11	9	9	8	9	9	7	12	7	8	7	7	9	14	9	7	6	6	7	8	7	7	8	8	10	6	8	8
chr25	981192	982192	9	9	10	11	9	6	7	6	8	9	11	12	9	11	11	13	9	8	10	13	9	10	7	7	9	8	13	6	8	8	7	12	12	8	9	7	7	9	9	8	8	7	8	10	8	7	4
chr25	982192	983192	10	10	11	13	10	8	9	7	9	10	13	14	10	14	13	14	10	9	13	15	10	12	8	9	10	8	14	7	9	9	9	14	14	10	10	7	8	9	9	9	9	8	9	12	9	8	5
chr25	984192	985192	11	11	11	13	11	8	9	8	10	10	13	14	10	15	14	14	11	10	14	16	11	12	9	9	11	9	16	7	9	9	10	14	14	10	10	8	8	11	10	10	9	8	10	13	10	8	4
chr25	986192	987192	11	10	12	14	11	8	9	8	10	11	13	15	10	14	14	15	11	10	13	15	10	13	9	10	11	9	17	7	9	9	9	14	15	10	11	8	9	10	10	10	10	8	9	13	10	8	6
chr25	988289	989289	11	12	12	13	12	8	9	8	9	11	14	15	10	15	14	14	11	10	14	16	11	11	8	9	11	9	16	7	9	9	10	14	15	10	10	8	8	11	10	10	10	9	10	13	10	8	5
chr25	990289	991289	11	10	11	14	11	7	8	8	9	10	13	14	10	13	13	13	10	9	13	14	9	11	9	8	11	8	19	7	10	9	9	13	15	10	10	8	8	10	9	9	9	8	9	12	10	8	4
chr25	992289	993289	10	10	11	13	11	8	8	8	9	10	13	14	10	14	13	14	10	9	13	15	10	12	8	9	10	8	17	6	10	9	9	13	15	10	9	8	8	9	10	9	9	8	9	12	10	7	4
chr25	994289	995289	12	11	12	13	11	8	9	8	10	12	15	15	11	15	14	13	12	11	14	15	11	13	8	9	10	8	17	7	10	9	10	14	14	10	10	9	8	9	11	11	10	8	10	13	10	8	5
chr25	996289	997289	9	9	10	11	9	7	8	5	9	10	12	13	9	13	13	12	10	8	12	14	10	11	7	8	10	8	12	6	8	8	8	12	12	8	9	7	7	8	9	9	8	7	8	11	8	7	4
chr25	997289	998289	5	5	5	6	5	4	4	5	4	5	6	6	5	6	6	6	5	4	6	6	5	7	4	3	5	4	11	4	4	4	4	7	6	5	4	4	4	4	4	4	4	4	4	5	4	4	4
chr25	1000386	1001386	10	9	10	12	9	7	8	7	9	10	11	13	9	12	12	13	10	9	12	13	9	11	7	9	10	8	15	7	8	8	8	13	13	10	10	7	7	9	9	9	8	7	9	12	8	7	4
chr25	1001386	1002386	10	10	10	12	9	7	8	7	9	10	12	13	9	13	13	12	10	9	12	14	10	11	8	8	10	8	15	6	8	8	8	13	13	9	10	7	7	9	9	9	8	7	8	11	9	7	4
chr25	1004386	1005386	5	5	5	6	5	4	4	4	4	5	6	7	5	6	6	7	5	5	6	7	4	6	4	4	4	4	9	4	4	4	4	7	6	5	5	4	4	5	5	4	4	4	5	6	4	4	4
chr25	1005386	1006386	12	11	12	14	12	8	8	10	10	11	14	15	11	15	14	14	11	10	14	16	11	13	9	9	10	8	17	7	10	10	10	14	15	11	9	8	8	9	11	10	10	9	10	12	10	8	5
chr25	1009670	1010670	10	10	10	11	10	7	8	6	9	10	12	13	9	13	12	12	10	9	13	14	9	11	8	8	10	7	12	6	8	8	9	12	13	8	9	7	7	9	9	8	9	7	9	11	9	7	4
chr25	1522417	1523468	1	1	1	1	1	1	1	1	1	1	1	1	1	1	1	1	1	1	1	0	2	1	1	1	1	1	0	1	1	1	1	0	1	1	1	1	1	1	1	1	1	1	1	1	1	1	1
chr25	1531542	1532542	2	2	2	2	2	2	2	2	2	2	2	2	2	2	2	2	2	2	2	2	2	2	2	2	2	2	1	2	2	2	2	2	2	2	2	2	2	2	2	2	2	2	2	1	2	2	2
chr25	1672439	1673508	2	2	2	2	2	2	2	2	2	2	2	2	2	2	2	3	2	2	2	3	2	2	2	2	2	2	2	2	2	2	2	2	3	2	2	2	2	2	2	2	2	2	2	2	2	2	2
chr25	1748849	1749903	2	2	1	2	2	2	2	2	2	2	2	2	2	2	1	1	2	2	2	2	2	2	2	2	2	2	1	2	2	2	2	2	1	2	2	2	2	2	2	2	2	2	2	2	2	2	2
chr25	1816423	1817423	2	2	2	2	2	2	2	2	2	2	2	2	2	2	2	3	3	2	2	3	2	2	2	2	2	2	2	2	2	2	2	2	2	2	2	2	2	2	2	2	2	2	2	2	2	2	2
chr25	1816423	1817423	2	2	2	2	2	2	2	2	2	2	2	2	2	2	2	3	3	2	2	3	2	2	2	2	2	2	2	2	2	2	2	2	2	2	2	2	2	2	2	2	2	2	2	2	2	2	2
chr25	1816423	1817423	2	2	2	2	2	2	2	2	2	2	2	2	2	2	2	3	3	2	2	3	2	2	2	2	2	2	2	2	2	2	2	2	2	2	2	2	2	2	2	2	2	2	2	2	2	2	2
chr25	1829534	1830732	1	1	1	1	1	1	1	1	1	1	1	1	1	1	1	0	1	1	1	0	1	1	1	1	1	1	0	1	1	1	1	0	0	1	1	1	1	1	1	1	1	1	1	1	1	1	1
chr25	1829534	1830732	1	1	1	1	1	1	1	1	1	1	1	1	1	1	1	0	1	1	1	0	1	1	1	1	1	1	0	1	1	1	1	0	0	1	1	1	1	1	1	1	1	1	1	1	1	1	1
chr25	1908166	1909166	2	2	3	2	2	2	2	2	2	2	2	3	2	2	2	2	2	2	2	3	2	2	3	2	2	2	2	2	2	2	2	3	2	2	2	2	2	2	2	2	2	2	2	2	2	2	2
chr25	1908166	1909166	2	2	3	2	2	2	2	2	2	2	2	3	2	2	2	2	2	2	2	3	2	2	3	2	2	2	2	2	2	2	2	3	2	2	2	2	2	2	2	2	2	2	2	2	2	2	2
chr25	1908166	1909166	2	2	3	2	2	2	2	2	2	2	2	3	2	2	2	2	2	2	2	3	2	2	3	2	2	2	2	2	2	2	2	3	2	2	2	2	2	2	2	2	2	2	2	2	2	2	2
chr25	1934864	1935898	2	2	2	2	2	2	2	2	2	2	2	2	2	2	2	2	2	2	2	1	2	2	2	1	2	2	2	2	2	2	2	2	2	2	2	2	2	2	2	2	2	2	2	2	2	2	2
chr25	1934864	1935898	2	2	2	2	2	2	2	2	2	2	2	2	2	2	2	2	2	2	2	1	2	2	2	1	2	2	2	2	2	2	2	2	2	2	2	2	2	2	2	2	2	2	2	2	2	2	2
chr25	1934864	1935898	2	2	2	2	2	2	2	2	2	2	2	2	2	2	2	2	2	2	2	1	2	2	2	1	2	2	2	2	2	2	2	2	2	2	2	2	2	2	2	2	2	2	2	2	2	2	2
chr25	1985640	1986898	2	2	2	1	2	2	2	2	2	1	2	2	2	2	2	1	2	2	2	1	2	2	2	2	2	2	1	1	2	2	2	1	1	2	2	2	2	2	1	2	2	2	2	1	2	2	2
chr25	1989060	1990204	2	2	1	2	2	2	2	2	2	1	2	1	2	2	1	2	2	2	1	2	2	2	2	2	1	2	1	2	2	2	2	1	1	2	2	2	1	2	2	2	2	2	2	2	2	2	2
chr25	1993406	1994406	2	2	2	2	2	2	2	2	2	2	2	2	2	2	2	2	2	2	2	2	2	2	2	2	2	2	2	2	2	2	2	2	2	2	2	2	2	2	2	2	2	2	2	2	2	2	2
chr25	1995406	1996406	2	2	2	2	2	2	2	2	2	2	2	2	2	2	2	2	2	2	2	2	2	2	2	2	2	2	1	2	2	2	2	2	1	2	2	2	2	2	2	2	2	2	2	1	2	2	2
chr24	293778	294778	2	2	2	2	2	2	2	2	2	2	2	2	2	1	2	2	2	2	2	2	2	2	2	2	2	2	2	2	2	2	2	2	2	2	2	2	2	2	2	2	2	2	2	2	2	2	2
chr24	5694124	5695124	2	2	2	2	2	2	2	2	2	2	2	2	2	2	2	3	2	2	2	2	2	2	2	2	2	2	3	2	2	2	2	2	2	2	2	2	2	2	2	2	2	2	2	2	2	2	2
chr24	6272294	6274517	4	3	3	3	4	4	3	3	3	3	4	3	2	4	3	3	3	3	3	3	4	3	3	3	3	3	4	3	3	3	3	3	4	3	3	3	3	4	4	3	3	4	2	3	3	3	3
chr23	1242044	1243044	2	2	2	2	2	2	2	2	2	2	2	2	2	2	2	3	2	2	3	2	2	2	2	2	2	2	4	2	2	2	2	3	2	2	2	2	2	2	2	2	2	2	2	3	2	2	2
chr23	1244044	1245044	2	2	2	2	2	2	2	2	2	2	2	2	2	3	2	2	2	2	2	2	2	2	2	2	2	2	3	2	2	2	2	2	2	2	2	2	2	2	2	2	2	2	2	2	2	2	2
chr23	1245044	1246044	2	2	2	3	2	2	2	2	3	2	2	2	2	2	2	2	2	2	2	2	2	2	2	2	2	3	3	2	2	2	3	2	2	2	2	2	2	2	2	2	2	2	2	2	2	2	2
chr23	1410067	1411354	2	2	2	2	2	2	2	2	2	2	2	2	2	2	2	2	2	2	2	2	2	2	2	2	2	2	1	2	2	2	2	2	1	2	2	2	2	2	2	2	2	2	2	2	2	2	2
chr23	1763724	1765592	2	2	2	2	2	2	2	2	2	2	2	2	2	2	2	2	2	2	2	3	2	2	2	2	2	2	2	2	2	2	2	2	2	2	2	2	2	2	2	2	2	2	2	2	2	2	2
chr23	1768760	1769832	2	2	2	2	2	2	2	2	2	2	2	2	2	2	2	2	2	2	2	2	2	2	2	2	2	2	2	2	2	2	1	2	2	2	2	2	1	2	1	2	2	2	2	2	2	2	2
chr23	1769832	1770984	2	2	3	2	2	2	2	2	2	2	2	3	2	2	2	3	2	2	2	3	2	3	2	2	2	2	2	3	2	3	2	3	3	2	2	2	2	3	2	2	2	2	2	2	2	2	2
chr23	4195005	4196005	2	2	2	2	2	2	2	2	2	2	2	2	2	2	2	2	2	2	2	2	2	2	2	2	2	2	2	2	2	2	2	2	2	2	2	2	2	2	2	2	2	2	2	2	2	2	2
chr23	4984545	4985741	2	2	1	2	2	2	2	2	2	1	2	2	2	2	2	2	2	2	2	2	2	2	2	2	2	2	2	2	2	2	2	2	2	2	2	2	2	2	2	2	2	2	2	2	2	2	2
chr23	5272074	5273074	2	2	2	2	2	2	2	2	2	2	2	2	2	2	2	2	2	2	2	2	2	2	2	2	2	2	2	2	2	2	1	2	2	2	1	2	2	2	2	2	2	2	2	2	2	2	2
chr23	5611944	5613032	2	2	2	2	2	2	2	2	2	2	2	2	2	2	2	3	2	2	2	2	2	2	2	1	2	1	4	2	2	2	2	2	2	2	2	2	2	2	2	2	2	2	2	2	2	2	2
chr23	5615078	5617329	2	2	2	2	2	2	2	2	2	3	2	2	2	2	2	3	2	2	2	2	2	1	3	3	3	2	4	2	2	2	2	2	2	2	3	2	2	2	2	2	2	2	2	3	2	2	2
chr23	5619329	5620518	2	2	2	2	2	2	2	2	2	2	2	1	2	2	2	2	1	2	3	2	2	2	2	2	2	2	2	2	2	2	2	2	2	2	2	2	2	2	2	2	2	2	2	2	2	2	2
chr22	18834	19902	2	2	2	3	2	2	2	2	2	2	3	2	2	2	2	2	1	2	2	2	2	2	2	2	2	2	3	2	2	2	2	1	2	2	2	2	2	2	1	2	2	2	2	2	2	2	2
chr22	2404216	2405216	2	2	2	2	2	2	2	2	2	2	2	2	2	2	2	2	2	2	2	2	2	2	2	2	2	2	3	2	2	2	2	2	2	2	2	2	3	2	2	2	2	2	2	2	2	2	2
chr22	2408216	2409216	2	2	2	2	2	2	2	3	2	2	2	2	2	2	2	2	2	2	2	2	2	2	2	2	2	2	3	2	2	2	2	2	2	2	2	2	2	2	2	2	2	2	2	2	2	2	2
chr22	2412247	2413247	2	2	2	2	2	2	2	2	2	2	2	3	2	2	3	3	3	2	3	3	3	2	2	2	3	2	4	2	2	2	2	3	3	2	2	2	2	3	2	3	2	2	2	2	2	2	2
chr22	2454968	2455999	2	2	2	3	2	2	2	2	2	2	2	3	2	3	2	2	2	2	3	3	2	2	2	2	2	2	3	2	2	2	2	3	3	2	2	2	2	2	3	2	2	2	2	2	2	2	2
chr21	18801	20032	1	1	1	2	1	1	1	1	1	1	1	1	1	1	1	1	1	1	1	1	2	2	1	1	1	1	1	1	1	1	1	1	1	2	1	1	1	1	1	1	1	1	1	1	1	1	2
chr21	597096	598146	2	2	2	2	2	2	2	2	2	2	2	2	2	1	2	2	2	2	2	2	2	2	2	2	2	2	2	2	2	2	2	2	2	2	2	2	2	2	2	2	2	2	2	2	2	2	2
chr21	3219983	3220983	2	2	2	2	2	2	2	2	2	2	2	2	2	2	2	2	2	2	2	2	2	2	2	2	2	1	3	1	2	2	2	2	3	1	2	2	2	2	2	2	2	2	2	2	2	2	2
chr21	4077066	4078104	1	2	1	2	1	2	2	2	2	2	2	2	2	2	2	2	2	3	2	2	2	2	2	2	2	2	1	2	2	2	2	2	2	2	2	2	2	2	2	2	2	2	2	2	2	2	2
chr21	4455792	4456880	1	1	1	1	1	1	1	2	1	1	1	1	1	1	0	1	1	1	1	1	1	1	1	1	1	1	0	1	1	1	1	0	1	1	1	1	1	1	1	2	1	1	2	1	1	2	2
chr21	4541428	4542513	2	2	2	2	2	2	2	2	2	1	2	2	2	2	2	2	1	2	1	2	2	3	1	2	2	2	1	2	2	2	2	2	2	2	3	2	2	2	2	2	2	2	2	1	2	2	2
chr21	6392425	6393635	2	2	2	2	2	2	2	2	2	2	2	1	2	2	2	1	2	2	2	2	2	2	2	2	2	2	1	2	2	2	2	2	2	2	2	3	2	2	2	2	2	2	2	2	2	2	2
chr20	203143	204184	2	2	2	2	2	2	1	2	2	2	2	2	2	2	2	2	2	2	2	2	2	2	2	2	2	2	2	2	2	2	2	2	2	2	2	2	2	2	2	2	2	2	2	2	2	2	2
chr20	664366	665366	2	3	2	2	2	2	2	2	2	2	2	2	2	2	2	3	2	2	3	2	3	2	3	3	2	2	2	2	3	2	2	3	2	2	2	2	2	2	2	2	2	2	2	2	2	2	2
chr20	667366	668413	2	2	2	2	2	2	2	2	2	2	2	2	2	2	2	2	2	2	2	2	3	2	2	2	2	3	3	2	2	2	2	2	3	2	2	2	2	2	2	2	2	2	2	2	2	2	2
chr20	687834	688834	2	2	2	2	2	2	2	2	2	2	2	2	2	3	3	2	2	3	3	3	2	2	3	3	2	2	2	2	2	2	2	3	2	2	2	2	2	2	2	2	2	3	2	2	2	2	2
chr20	1430979	1432631	2	2	2	2	2	2	2	2	2	2	2	2	2	2	2	2	2	2	2	2	2	2	2	2	2	2	1	2	2	2	2	2	2	2	2	2	2	2	2	2	2	2	2	2	2	2	2
chr20	2247335	2248384	2	3	2	3	2	2	2	3	2	2	2	3	3	2	3	2	3	2	3	2	2	2	2	2	2	2	3	2	2	2	2	2	3	2	2	2	2	2	2	2	3	2	2	3	2	2	3
chr20	2248384	2249384	7	8	13	16	11	7	9	8	5	8	9	12	12	9	14	9	10	11	14	13	6	8	11	9	7	9	17	7	9	10	8	10	18	7	9	6	10	11	16	10	13	9	6	22	13	10	11
chr20	2249384	2250462	5	6	9	10	8	6	6	8	5	6	7	8	8	7	10	7	7	8	11	9	5	6	8	7	5	7	14	6	6	8	6	7	12	5	7	4	7	8	12	7	10	6	4	16	12	7	11
chr20	2316301	2320960	6	7	11	13	9	7	7	9	5	6	8	10	10	9	12	9	8	9	14	11	6	7	10	8	6	8	17	7	7	10	7	8	15	6	9	5	9	10	14	9	12	8	5	21	14	9	13
chr20	2320960	2321960	7	8	13	15	11	7	8	8	5	7	9	12	11	9	14	9	10	11	14	13	6	8	10	9	6	9	17	7	9	10	8	10	18	7	9	7	10	11	16	10	13	8	6	22	13	10	11
chr20	2332943	2333943	2	3	2	2	2	2	2	2	2	2	2	2	2	2	2	2	2	2	1	1	2	2	2	2	2	2	2	2	2	2	2	2	2	2	2	2	2	2	2	2	2	2	1	3	4	3	2
chr20	5036800	5037888	2	2	2	2	2	2	2	2	2	2	2	2	2	2	2	2	2	2	2	1	2	2	2	2	1	2	1	2	2	2	2	2	1	2	2	2	2	2	2	2	2	2	2	2	2	2	2
chr20	5831481	5832543	8	9	9	15	9	8	11	18	9	10	12	16	12	14	11	10	11	7	17	12	19	20	9	14	16	16	17	13	12	15	15	11	11	10	9	8	7	8	8	12	13	11	14	14	10	10	12
chr20	5835172	5836172	19	27	23	41	24	17	27	40	23	22	29	36	25	25	27	23	24	17	41	31	36	39	24	25	31	30	57	24	23	30	33	26	30	18	19	14	14	24	20	23	25	24	32	28	18	19	31
chr20	5846751	5847894	2	2	2	2	2	2	2	2	2	2	2	2	2	2	2	2	1	2	2	1	2	2	2	2	2	2	1	2	2	2	2	2	2	2	2	2	2	2	2	2	2	2	2	2	2	2	2
chr20	9500608	9501643	1	1	1	0	0	1	1	1	1	1	1	1	1	1	1	0	1	1	0	1	1	1	1	1	1	1	0	1	1	1	1	1	1	1	1	1	1	1	1	1	1	1	1	1	1	1	1
chr20	9723306	9724306	2	2	2	3	2	2	2	2	2	3	2	2	2	2	3	2	2	2	3	2	2	2	2	2	2	2	3	2	2	2	2	2	3	2	2	2	2	3	2	2	2	2	2	3	2	2	2
chr20	9729804	9730873	2	2	2	2	1	2	2	2	2	2	2	2	2	2	2	2	2	2	2	2	2	2	2	2	2	2	3	2	2	2	2	2	2	2	2	2	2	2	2	2	2	2	2	2	2	2	2
chr20	10636845	10637845	2	2	2	2	2	2	2	2	2	2	2	2	2	2	2	2	2	2	2	2	2	2	2	2	2	2	2	2	2	2	2	2	2	2	2	2	2	2	2	2	2	2	2	2	2	2	2
chr20	10941083	10942139	2	2	2	2	2	2	2	2	2	2	2	3	2	2	3	2	2	2	2	2	3	2	2	3	3	2	2	2	2	2	3	2	3	2	2	2	2	2	2	2	2	2	2	2	2	2	2
chr2	2074	3074	8	7	8	7	8	6	6	5	5	5	9	8	5	6	10	8	6	5	7	7	7	7	7	6	6	7	16	5	5	5	6	7	7	7	7	6	5	6	5	7	8	7	8	8	6	7	8
chr2	20058	21322	1	1	1	2	1	1	1	1	1	1	2	2	1	1	1	1	1	1	1	1	1	1	1	1	1	2	2	1	1	1	1	1	1	1	1	1	1	1	1	1	1	1	1	1	1	1	1
chr2	155974	156974	3	2	2	2	2	2	2	2	2	2	2	2	2	2	2	2	2	2	2	2	2	2	2	2	2	2	3	2	2	2	2	2	2	2	2	2	2	2	2	2	2	2	2	3	2	2	3
chr2	466546	468115	2	2	2	2	2	2	2	2	2	2	2	2	2	2	2	2	2	2	2	2	2	2	2	2	2	2	2	2	2	2	2	2	2	2	2	2	2	2	2	2	2	2	2	2	2	2	2
chr2	3874869	3876051	2	2	2	3	2	2	2	2	2	2	2	2	2	2	2	2	2	2	2	2	2	2	2	2	2	2	2	2	2	2	2	2	2	2	2	2	2	2	2	2	2	2	2	2	2	2	2
chr2	3874869	3876051	2	2	2	3	2	2	2	2	2	2	2	2	2	2	2	2	2	2	2	2	2	2	2	2	2	2	2	2	2	2	2	2	2	2	2	2	2	2	2	2	2	2	2	2	2	2	2
chr2	7040787	7042531	9	11	8	13	8	8	6	7	8	9	9	7	9	11	11	11	9	8	12	11	10	5	7	9	9	8	9	8	5	8	7	12	13	7	7	11	7	8	5	6	7	6	7	9	6	5	5
chr2	7042531	7043531	15	16	17	21	12	10	9	12	11	12	17	14	10	13	17	19	12	11	19	19	14	7	12	10	10	9	22	10	6	10	9	19	21	9	11	14	10	11	10	8	9	9	8	11	8	8	8
chr2	7043531	7045266	12	15	10	16	9	10	8	12	11	10	13	10	10	9	10	11	10	12	12	12	11	5	11	10	7	7	10	9	6	10	7	12	13	8	9	15	7	9	7	7	7	8	7	10	7	7	10
chr2	7045266	7046266	11	14	11	16	10	9	8	7	10	11	12	10	9	13	15	15	10	10	15	15	11	6	8	11	11	9	14	9	6	9	8	15	17	8	8	13	8	10	7	7	9	8	9	10	7	6	4
chr2	7046266	7047266	16	17	16	22	12	10	9	14	12	13	18	15	11	13	16	17	12	13	17	18	14	7	13	11	9	9	23	10	7	11	9	18	21	10	11	16	10	12	10	8	9	10	8	12	9	8	9
chr2	11883129	11885677	1	1	1	1	1	1	1	1	1	2	2	2	1	2	1	1	1	1	1	2	2	1	2	1	1	1	2	1	1	1	1	1	1	1	1	1	1	1	1	1	1	1	1	1	2	1	1
chr2	11906172	11907538	1	1	1	2	1	1	1	2	1	1	1	2	1	1	1	1	1	1	1	1	2	1	1	1	1	1	1	1	1	2	1	1	1	1	1	1	1	1	1	1	1	1	1	1	1	1	1
chr2	11960146	11961280	1	1	1	1	1	1	1	1	1	1	1	1	1	1	1	1	1	1	1	1	1	1	1	1	1	1	1	1	1	1	1	1	1	1	1	1	1	1	1	1	1	1	1	1	1	1	2
chr2	16801708	16803068	2	2	2	1	2	1	2	2	2	2	2	2	2	2	2	2	2	2	2	2	2	2	2	3	2	3	2	2	2	2	2	2	2	2	2	2	2	2	2	2	2	2	2	2	2	2	2
chr2	24568995	24569995	2	2	2	2	2	2	2	2	2	2	2	2	2	2	2	2	1	2	2	1	2	2	2	2	2	2	1	2	2	2	2	2	2	2	2	2	2	2	1	2	2	2	2	2	2	2	2
chr2	31111452	31112452	11	9	12	13	10	7	11	12	7	7	14	14	7	9	15	12	9	8	9	20	7	8	10	9	12	9	29	8	10	9	10	17	13	13	8	10	10	15	13	8	9	10	9	11	8	9	13
chr2	31121898	31123663	7	5	7	6	6	4	8	7	4	3	5	7	6	6	5	5	5	4	5	8	4	5	7	5	6	6	14	6	7	5	6	8	6	7	4	6	6	6	5	5	5	6	6	6	5	7	7
chr2	31123663	31124663	9	8	10	10	9	6	10	8	6	5	8	10	6	7	8	7	8	6	8	13	6	5	8	7	8	8	19	8	9	9	8	12	10	10	5	8	8	9	7	6	7	9	8	8	7	10	8
chr2	31141287	31142287	9	7	8	9	7	5	8	8	4	3	7	9	6	8	7	6	5	6	5	13	5	4	9	6	6	6	14	8	9	7	8	11	9	13	5	8	7	11	5	5	5	8	7	6	5	9	9
chr2	31142287	31143287	8	7	9	9	7	5	7	7	4	3	7	7	5	6	10	6	6	5	5	13	3	4	8	7	8	6	20	5	8	6	8	9	8	9	4	7	7	9	5	4	7	7	7	7	5	7	8
chr2	31143287	31144287	8	7	7	10	8	5	9	9	4	4	8	8	6	7	7	6	7	8	6	13	5	4	9	7	8	7	16	7	8	8	7	10	9	10	5	8	6	10	7	6	6	8	8	8	6	8	10
chr2	31144287	31145287	8	6	7	8	6	5	7	7	3	3	4	6	5	6	6	5	4	4	5	11	3	3	5	4	6	5	19	5	6	5	6	9	8	9	4	5	6	8	4	4	4	6	6	6	4	5	5
chr2	31250529	31251897	9	7	10	9	9	6	9	9	5	5	7	8	6	6	8	6	7	6	7	12	6	6	8	7	8	7	19	7	8	8	7	12	8	11	5	7	7	9	7	6	6	8	8	8	6	9	9
chr2	31251897	31253607	9	7	10	9	8	5	11	8	5	5	8	10	7	8	7	7	7	6	7	12	5	6	9	7	8	8	20	8	9	8	8	11	9	10	5	8	7	9	7	6	7	9	8	8	6	9	10
chr2	31253607	31254607	7	6	7	8	6	5	7	6	3	3	4	6	5	6	6	4	5	4	5	11	3	3	5	4	6	5	19	6	7	5	6	9	8	8	4	5	6	8	5	4	4	5	6	7	5	6	5
chr2	31255607	31256656	6	6	6	7	7	5	7	7	4	3	6	6	5	5	6	5	6	7	6	8	5	5	7	5	6	7	11	6	6	6	6	8	6	7	4	7	5	8	6	5	6	7	6	7	5	7	7
chr2	32324938	32325999	1	1	2	2	2	1	2	2	3	2	2	1	2	2	2	2	2	2	2	2	2	2	1	2	2	2	2	1	2	2	2	1	2	2	2	2	2	2	2	2	2	1	2	2	2	2	2
chr2	32791953	32793022	2	2	2	2	2	2	2	2	2	2	2	2	2	2	1	2	2	2	2	2	2	2	2	2	2	2	1	2	2	2	2	1	2	2	2	2	2	2	1	2	2	2	2	2	2	2	2
chr2	32793022	32794303	2	2	2	2	2	2	2	2	2	2	2	2	2	2	2	2	2	2	2	2	2	2	2	2	2	2	1	2	2	2	2	2	2	2	2	2	2	1	2	2	2	2	2	2	2	2	1
chr2	32868371	32869409	2	2	2	2	2	2	2	2	2	2	2	2	2	2	2	2	2	2	2	2	2	2	2	2	2	2	1	2	2	2	2	2	2	2	2	2	2	2	2	2	2	2	2	2	2	2	2
chr2	32868371	32869409	2	2	2	2	2	2	2	2	2	2	2	2	2	2	2	2	2	2	2	2	2	2	2	2	2	2	1	2	2	2	2	2	2	2	2	2	2	2	2	2	2	2	2	2	2	2	2
chr2	32868371	32869409	2	2	2	2	2	2	2	2	2	2	2	2	2	2	2	2	2	2	2	2	2	2	2	2	2	2	1	2	2	2	2	2	2	2	2	2	2	2	2	2	2	2	2	2	2	2	2
chr2	32924282	32925330	1	1	1	1	1	1	1	2	1	1	1	1	1	1	1	1	1	1	1	0	2	1	1	1	1	1	0	1	1	1	1	0	1	1	1	1	1	1	1	1	1	1	1	1	1	1	1
chr2	32924282	32925330	1	1	1	1	1	1	1	2	1	1	1	1	1	1	1	1	1	1	1	0	2	1	1	1	1	1	0	1	1	1	1	0	1	1	1	1	1	1	1	1	1	1	1	1	1	1	1
chr2	33162380	33163418	2	2	2	2	2	2	2	2	2	2	2	1	2	2	2	2	2	2	2	2	2	2	2	2	2	2	2	2	2	2	2	2	1	2	2	2	2	2	2	2	2	2	2	2	2	2	2
chr2	33162380	33163418	2	2	2	2	2	2	2	2	2	2	2	1	2	2	2	2	2	2	2	2	2	2	2	2	2	2	2	2	2	2	2	2	1	2	2	2	2	2	2	2	2	2	2	2	2	2	2
chr2	33168617	33169811	1	1	1	1	1	1	1	1	1	1	1	1	1	1	1	1	1	1	0	0	1	1	1	1	1	1	0	1	1	1	1	0	1	1	1	2	1	1	1	1	1	2	1	1	1	1	1
chr2	33168617	33169811	1	1	1	1	1	1	1	1	1	1	1	1	1	1	1	1	1	1	0	0	1	1	1	1	1	1	0	1	1	1	1	0	1	1	1	2	1	1	1	1	1	2	1	1	1	1	1
chr2	33189302	33190530	2	2	2	2	2	2	2	2	2	2	2	2	2	2	2	2	2	2	2	1	2	1	2	2	2	2	1	2	2	2	2	1	2	2	2	2	2	2	2	2	2	2	2	2	2	2	2
chr2	33189302	33190530	2	2	2	2	2	2	2	2	2	2	2	2	2	2	2	2	2	2	2	1	2	1	2	2	2	2	1	2	2	2	2	1	2	2	2	2	2	2	2	2	2	2	2	2	2	2	2
chr2	44022463	44023556	1	1	1	1	1	1	1	2	1	1	1	1	1	1	1	1	1	1	1	1	1	1	1	1	1	2	1	1	1	1	1	1	1	1	1	1	1	1	1	1	1	1	1	1	1	1	1
chr2	45666452	45667452	4	5	5	5	4	4	5	5	4	4	5	5	4	4	5	5	4	4	5	5	4	4	4	4	4	4	4	3	4	4	4	6	5	5	5	3	4	4	3	4	4	4	4	5	4	4	6
chr2	53135927	53139115	1	2	2	1	1	1	1	2	1	1	1	2	2	1	1	1	2	1	1	1	1	2	2	1	2	1	2	1	1	2	1	2	1	2	1	1	1	1	1	1	1	1	1	1	1	1	1
chr2	53966951	53967951	2	2	2	2	2	2	2	2	2	2	2	2	2	2	2	2	2	2	2	2	3	2	2	3	2	2	2	3	2	2	2	2	2	2	2	1	2	2	2	2	3	2	2	2	2	2	2
chr2	54633356	54635143	1	1	1	2	1	1	1	1	1	1	1	1	1	1	1	1	1	1	1	1	1	1	1	1	1	1	1	1	1	1	1	1	1	1	1	1	1	1	1	1	1	1	1	1	0	1	1
chr2	54741173	54742531	2	1	2	2	1	2	2	2	2	2	2	2	2	2	2	2	2	2	2	1	2	2	1	2	2	2	2	2	2	2	2	1	1	2	2	2	2	1	2	2	2	2	1	2	2	2	2
chr2	55095088	55104074	1	1	1	1	1	1	1	1	1	1	2	1	1	1	2	2	1	1	1	2	1	2	1	1	1	1	2	1	1	1	1	2	1	1	1	2	1	1	1	1	1	1	1	1	2	1	2
chr2	55395206	55396270	2	2	1	2	2	2	2	2	2	1	2	2	2	2	2	2	2	2	2	2	2	2	2	2	2	2	1	2	2	2	2	2	2	2	2	2	2	2	2	2	2	2	2	2	2	2	2
chr2	55700480	55705978	1	1	1	1	1	1	1	1	1	1	1	1	1	2	2	1	1	1	2	2	1	1	1	1	2	1	2	1	1	1	1	2	2	1	1	1	1	1	2	1	0	1	1	1	1	1	1
chr2	66440736	66441736	3	3	4	4	3	3	3	3	3	3	3	3	2	3	5	5	2	3	4	4	3	3	3	3	3	2	3	2	3	3	3	5	4	2	3	2	3	3	3	3	3	3	3	3	3	3	2
chr2	67254508	67255593	1	2	2	1	1	1	1	2	1	2	1	1	1	1	1	1	1	1	1	1	1	2	1	1	1	2	1	1	1	1	2	1	1	2	1	2	1	1	1	1	1	1	2	1	1	1	1
chr2	67262304	67263304	5	4	5	4	4	4	4	4	4	5	5	7	4	5	5	7	4	4	6	5	5	5	4	5	5	5	6	4	4	4	4	5	6	4	5	3	5	4	4	4	5	4	4	5	5	4	4
chr2	70925663	70926733	1	2	2	2	2	2	2	2	2	2	2	2	2	2	2	2	2	2	2	2	2	2	2	2	2	2	2	2	2	2	2	2	2	2	2	2	2	2	2	2	1	2	2	2	2	2	2
chr2	74483876	74484876	4	4	4	4	3	3	4	4	4	3	4	4	3	4	4	5	3	3	5	3	4	4	4	5	4	4	4	4	4	3	3	5	3	4	4	2	3	2	3	3	4	3	4	4	3	3	4
chr2	74484876	74485876	6	5	6	6	4	4	6	5	5	6	8	7	6	7	7	9	7	6	8	8	5	5	4	6	6	6	7	5	5	4	4	8	8	5	6	4	4	5	5	4	5	5	5	6	5	4	5
chr2	74608887	74611662	1	1	1	1	1	1	1	1	1	1	1	1	1	1	1	1	1	1	1	1	1	1	1	1	1	1	1	1	1	1	1	1	1	1	1	1	1	1	1	1	1	2	1	1	1	2	1
chr2	76304994	76306066	3	6	8	13	7	5	7	8	11	11	18	17	11	17	14	15	10	8	14	12	8	6	4	4	5	10	16	2	3	3	4	14	6	8	6	5	6	6	10	7	7	12	11	14	6	6	5
chr2	79532110	79535416	5	4	4	5	4	3	4	7	3	4	5	5	4	5	5	4	4	4	5	7	5	5	3	4	4	4	8	3	4	4	3	5	6	4	4	3	4	4	4	4	4	4	4	6	4	4	5
chr2	89393280	89394280	2	2	2	2	2	2	2	2	2	2	2	2	2	2	2	2	2	2	2	2	2	2	2	2	2	2	2	2	2	2	2	2	2	2	2	2	2	2	2	2	2	2	2	2	2	2	2
chr2	89403353	89404385	2	2	2	1	2	2	2	2	2	2	2	1	2	2	2	2	2	2	2	1	1	2	2	2	2	2	2	2	2	2	2	2	2	2	2	2	2	2	2	2	2	2	2	2	2	2	2
chr2	94639495	94640495	3	2	2	2	2	3	2	2	2	2	2	2	2	2	2	2	2	2	2	2	2	2	2	2	2	2	2	2	2	3	2	2	2	2	2	2	2	2	1	2	2	3	2	2	2	2	2
chr2	98937700	98938740	2	2	2	2	2	1	2	2	2	2	2	1	2	2	1	2	2	2	3	2	2	2	2	2	2	1	2	2	2	2	1	2	2	1	2	2	2	2	2	2	2	2	1	2	2	2	2
chr2	104561850	104563007	2	2	2	2	2	2	2	2	2	2	2	2	2	2	2	2	2	2	2	2	2	2	2	2	2	2	2	2	2	2	2	2	2	2	2	2	2	2	2	2	2	2	2	2	2	2	2
chr2	112218859	112219859	2	2	3	2	2	2	2	2	2	2	2	2	2	2	2	2	2	3	2	2	2	2	2	2	2	2	2	3	2	2	2	2	2	2	2	2	2	2	2	2	2	3	2	2	2	2	2
chr2	114968668	114969765	2	2	2	1	2	2	2	2	2	2	2	2	2	2	1	2	2	2	2	2	2	2	2	2	2	2	1	2	2	2	2	2	1	2	2	2	2	2	2	2	2	2	2	2	2	2	2
chr2	120378268	120379268	23	34	34	37	23	18	19	26	31	28	24	26	19	22	46	52	27	23	27	31	34	28	23	18	31	16	79	18	27	19	14	46	50	29	26	23	27	30	38	16	22	16	23	20	15	14	27
chr2	120379268	120384195	11	13	14	16	10	8	7	8	14	11	11	9	9	11	16	20	12	10	11	12	13	10	10	9	13	8	18	8	12	9	7	17	18	11	12	11	12	11	16	8	9	7	9	11	7	7	8
chr2	132479929	132482029	1	1	2	2	1	1	1	1	1	1	1	1	1	1	1	1	1	1	1	1	1	2	1	1	1	2	1	1	1	1	1	1	1	1	1	1	1	1	1	1	1	0	1	1	2	1	1
chr2	133644198	133645231	2	2	2	2	2	2	2	2	2	2	2	2	2	2	2	2	2	2	2	2	2	2	2	2	2	2	2	2	2	2	2	2	2	2	2	2	2	2	2	2	2	2	1	2	2	2	2
chr2	133650749	133652833	1	1	1	1	1	1	1	1	1	1	1	1	1	1	1	1	1	1	2	1	2	1	1	1	2	1	1	1	1	1	1	1	1	2	1	1	1	1	1	1	1	1	1	1	1	1	2
chr2	145872659	145873728	2	2	2	2	2	2	1	2	2	2	2	2	2	2	1	2	1	2	2	2	2	1	2	2	2	2	2	2	2	2	2	2	2	2	2	2	2	2	2	2	2	2	2	2	2	1	2
chr2	148402235	148403568	2	2	2	2	2	2	2	2	2	2	2	2	3	2	2	2	2	2	2	2	2	2	2	2	3	2	1	2	2	2	2	2	2	2	2	2	2	2	2	2	2	2	2	2	2	3	2
chr19	30842	32153	2	2	2	2	2	2	2	2	2	2	2	2	2	2	2	2	2	2	2	2	2	2	2	2	2	2	1	2	2	2	2	2	1	2	2	2	2	1	2	2	2	2	2	2	2	2	2
chr19	36755	39061	2	2	3	2	2	2	3	2	2	2	3	3	2	2	2	3	2	2	2	2	2	2	3	2	2	2	3	2	2	2	2	2	2	2	2	2	2	2	2	2	2	3	2	2	2	2	2
chr19	39061	40061	2	2	3	3	3	2	2	2	2	2	3	3	2	3	3	2	2	2	3	2	2	2	2	3	2	2	4	2	2	2	2	2	3	2	2	2	2	2	2	2	3	2	2	2	2	2	2
chr19	40061	41061	2	2	3	2	3	2	2	2	2	2	3	3	2	3	3	3	2	2	3	3	2	2	2	3	3	2	4	2	2	2	2	3	2	2	2	2	3	2	2	3	2	3	3	3	3	2	2
chr19	41061	42061	2	2	3	2	3	3	2	2	2	2	2	2	2	2	3	2	2	2	2	2	2	2	2	2	2	2	3	2	2	2	2	2	2	2	2	2	2	2	2	2	2	2	2	2	2	2	2
chr19	42061	43061	2	2	3	2	3	2	2	2	2	2	2	3	2	3	3	3	2	2	3	2	2	3	2	3	3	3	3	2	2	2	2	2	3	2	2	2	2	2	2	2	2	2	2	3	2	2	2
chr19	4247728	4248728	2	2	2	2	2	2	2	2	2	2	2	2	2	2	2	2	2	2	2	2	2	2	2	2	2	3	2	2	2	2	2	2	2	2	2	2	2	2	2	2	2	2	2	2	2	1	2
chr19	4438459	4439459	2	2	2	2	2	2	2	2	2	2	2	2	1	2	2	3	2	2	2	3	3	3	2	3	3	2	3	3	2	2	2	2	2	2	2	2	2	2	2	2	2	2	2	2	2	2	2
chr19	5299982	5301199	2	1	2	1	2	2	2	2	2	2	2	2	2	2	1	2	2	2	2	2	2	2	3	1	2	2	1	2	2	2	2	2	2	2	2	2	2	2	2	2	2	2	2	2	2	2	2
chr19	5927974	5928974	2	2	2	2	2	2	2	2	2	2	2	2	2	2	2	3	2	2	2	2	2	2	2	2	2	2	2	2	2	2	2	2	2	2	2	2	2	2	2	2	2	2	2	2	2	2	2
chr19	7278416	7279501	2	2	2	2	2	2	2	2	2	2	2	1	2	2	2	2	2	2	2	2	2	2	2	2	2	2	1	2	2	2	1	2	2	2	2	2	2	2	2	2	2	2	2	2	2	2	3
chr19	7382386	7383616	2	2	2	2	2	2	2	2	2	2	2	2	2	2	2	2	2	2	2	2	2	2	2	2	2	2	1	2	2	2	2	3	2	2	2	2	2	2	3	2	2	2	2	3	2	2	2
chr19	7382386	7383616	2	2	2	2	2	2	2	2	2	2	2	2	2	2	2	2	2	2	2	2	2	2	2	2	2	2	1	2	2	2	2	3	2	2	2	2	2	2	3	2	2	2	2	3	2	2	2
chr19	7611222	7612463	2	2	2	2	2	2	2	2	2	2	2	2	2	2	2	2	2	2	2	2	2	2	2	2	2	2	1	2	2	2	2	2	2	2	2	2	2	2	2	2	2	2	2	2	2	2	2
chr19	8148789	8149927	2	2	2	2	2	2	1	2	2	2	2	2	2	2	2	1	2	2	2	2	2	2	2	2	2	2	1	2	2	2	2	2	2	2	2	2	2	2	2	2	2	2	2	2	2	1	2
chr19	8228431	8229431	2	2	2	2	2	2	2	1	2	2	2	2	2	1	2	2	2	2	2	2	2	1	2	2	2	2	2	2	2	2	2	2	2	2	2	2	2	2	2	2	2	2	2	2	2	2	2
chr19	8985840	8986883	2	2	2	2	2	2	2	2	2	2	2	2	2	2	2	2	2	3	2	3	2	2	2	2	2	2	2	2	2	2	2	2	2	2	2	2	2	2	2	2	2	2	2	2	2	2	2
chr19	9946614	9947856	3	4	4	4	4	2	3	2	3	4	4	4	3	3	5	5	3	2	3	2	2	2	3	4	3	3	10	2	2	2	3	4	3	3	3	2	3	2	2	3	3	3	3	4	3	3	3
chr19	9947856	9948940	3	2	2	2	2	2	2	2	2	2	2	3	2	2	2	3	2	2	1	2	2	1	2	2	2	2	5	2	2	2	2	2	2	2	2	2	2	2	2	2	2	2	2	2	2	2	2
chr19	9951898	9953155	5	5	5	7	6	4	5	3	3	3	6	5	2	3	6	6	4	3	3	3	3	4	4	4	4	4	11	3	3	3	4	4	5	4	5	3	4	5	4	5	5	4	4	5	4	4	6
chr18	30370	31370	10	7	8	9	9	6	8	7	7	6	8	10	7	8	10	9	10	8	8	6	8	11	9	6	7	6	8	6	6	6	7	11	10	5	9	5	6	8	10	7	9	7	7	10	6	6	12
chr18	41668	42668	20	18	14	23	15	13	17	17	13	14	19	17	15	17	19	18	11	9	15	22	15	19	11	15	19	14	12	11	10	11	13	23	23	11	14	13	13	19	17	13	17	17	16	19	12	11	23
chr18	3467106	3468157	2	2	2	2	2	2	2	1	3	2	2	2	2	2	3	2	2	2	2	2	2	2	3	2	2	2	1	2	2	2	2	2	2	2	2	2	2	2	2	2	2	2	2	2	3	3	2
chr18	4195511	4196511	2	2	2	2	2	2	2	2	2	2	2	2	1	2	2	2	2	2	2	2	2	1	2	2	2	2	2	2	2	2	2	2	2	2	2	2	2	2	1	2	2	2	2	2	2	2	2
chr18	4657776	4658776	2	2	2	2	1	2	2	2	2	2	2	2	2	2	2	2	2	2	2	3	2	2	2	2	2	2	2	2	2	2	2	2	2	2	2	2	2	2	3	2	2	2	2	2	2	2	2
chr18	4976575	4977752	2	2	2	2	2	2	2	2	2	2	2	2	2	2	2	2	2	2	2	2	2	2	2	2	2	2	2	2	1	2	2	2	2	2	2	2	2	2	2	2	2	2	2	2	2	2	2
chr18	9420090	9421090	2	3	2	2	2	2	2	2	2	2	2	2	2	2	2	2	2	2	2	2	3	2	2	2	3	3	2	2	2	2	2	2	2	2	2	2	3	2	2	2	2	2	2	2	2	2	2
chr18	10213574	10214800	2	2	2	2	2	2	2	2	2	2	2	2	2	2	2	2	2	2	2	3	2	2	2	2	2	2	2	2	2	2	1	2	2	2	2	2	2	2	2	2	2	2	2	2	2	2	2
chr17	132058	136059	2	2	2	3	2	2	2	2	2	2	2	2	2	2	3	2	2	2	2	2	2	2	2	2	3	3	3	2	2	2	2	2	2	2	2	2	2	2	2	3	2	2	2	3	2	2	2
chr17	136059	137059	2	2	3	2	2	2	2	2	2	2	2	3	2	2	3	2	3	2	3	3	2	2	2	2	3	2	3	2	2	2	2	3	3	2	3	2	2	2	2	3	2	2	3	3	2	2	2
chr17	137059	138593	2	2	2	2	2	2	2	2	2	2	2	2	2	2	2	2	2	2	2	2	2	2	2	2	3	2	3	2	2	2	2	2	2	2	2	2	2	2	2	2	2	2	2	2	2	2	2
chr17	138593	139593	2	2	2	3	2	2	2	2	2	2	3	2	3	3	3	2	2	2	2	2	2	2	2	2	3	2	4	2	2	2	2	2	2	2	3	2	2	2	2	2	2	2	2	3	2	2	2
chr17	150522	151522	3	4	4	4	3	3	3	3	3	3	4	4	3	4	4	4	4	3	4	4	4	4	4	4	3	3	4	4	3	3	4	4	4	3	3	3	3	3	3	3	4	3	3	3	3	3	4
chr17	174053	175053	5	5	4	5	4	4	4	5	4	4	4	5	4	5	5	5	4	5	5	6	4	5	4	5	5	4	7	4	4	5	4	6	6	5	4	3	4	5	4	4	3	4	4	5	4	4	5
chr17	198582	199641	2	2	2	2	2	2	2	2	2	3	2	2	2	2	2	2	2	2	2	2	2	2	2	2	2	2	2	2	2	2	2	2	2	2	2	2	2	2	2	2	2	2	2	2	2	2	2
chr17	1527964	1528964	2	2	2	2	2	2	2	2	2	2	2	2	2	2	3	3	2	2	2	3	2	2	2	2	3	3	2	2	3	2	2	2	3	2	3	2	2	3	2	2	2	2	2	2	2	2	2
chr17	8765171	8766171	2	3	2	2	2	2	2	2	2	2	2	2	2	3	3	3	2	2	2	2	2	2	2	2	2	2	3	2	2	2	2	2	3	2	2	2	2	2	3	2	2	2	3	2	2	2	2
chr16	50582	51670	2	2	2	2	2	2	2	2	2	2	2	2	2	2	2	2	2	2	1	2	2	2	2	2	2	2	2	2	2	2	2	2	2	2	2	2	2	1	2	2	2	2	2	2	2	2	2
chr16	60365	61365	2	2	2	2	2	2	2	2	2	2	2	3	2	2	2	2	2	2	2	2	2	2	2	2	2	2	2	2	2	2	2	2	2	2	2	2	2	2	2	2	2	2	2	2	2	2	2
chr16	126125	127125	2	2	2	2	2	2	2	2	2	2	2	2	2	2	2	2	2	2	2	2	2	2	2	2	2	2	2	2	2	2	2	2	2	2	2	2	2	2	2	2	2	2	2	2	2	2	2
chr16	176306	177306	2	2	2	2	2	2	2	2	2	2	2	2	2	1	1	2	2	2	2	1	2	2	2	2	2	2	1	2	2	2	2	2	2	2	2	2	1	2	2	2	2	2	2	2	2	2	2
chr16	201823	202995	2	2	2	2	2	2	2	2	2	2	2	2	2	2	2	2	2	2	2	2	2	2	2	2	2	2	1	2	2	2	2	2	2	2	2	2	2	2	2	2	2	2	2	2	2	2	2
chr16	366583	367583	4	3	6	2	2	4	6	4	3	3	7	7	1	3	2	2	4	5	2	1	7	5	2	4	3	3	5	4	3	2	3	5	5	5	5	3	5	3	4	3	3	3	6	4	3	2	3
chr16	372601	373743	4	6	8	2	3	6	10	3	6	9	10	10	2	7	5	5	7	10	3	3	9	8	4	6	4	4	11	8	5	6	4	12	11	9	7	5	7	6	4	5	5	6	11	7	5	3	3
chr16	382916	384035	7	4	7	4	4	12	9	5	4	5	8	8	2	8	2	3	4	10	1	1	11	10	3	7	3	3	9	10	4	5	6	8	5	8	7	3	7	5	3	5	4	4	9	10	5	2	2
chr16	385248	387391	3	5	7	2	3	7	10	3	6	9	9	9	2	6	5	6	7	9	4	4	8	8	4	7	4	4	13	7	5	5	4	11	10	7	7	5	6	6	4	5	4	6	10	8	6	3	4
chr16	387391	392557	5	8	10	2	4	7	11	4	6	10	12	11	3	8	6	6	8	10	4	4	10	9	5	7	6	6	13	9	5	7	4	14	13	10	8	6	8	6	6	6	6	7	11	8	5	4	4
chr16	398619	400237	4	3	13	3	3	7	14	6	5	9	8	7	2	6	3	5	10	12	2	2	11	6	4	5	3	3	12	8	3	4	3	25	22	14	5	5	13	8	4	5	5	6	11	9	5	2	4
chr16	405655	406733	3	3	7	2	2	7	10	7	4	6	8	8	2	5	2	3	6	9	2	1	8	8	2	6	3	3	13	8	3	3	4	14	12	10	4	6	8	5	3	3	4	3	9	8	3	1	3
chr16	476159	480103	2	3	4	2	2	5	5	2	4	5	5	5	2	4	3	4	4	5	3	3	5	5	3	4	3	3	7	4	3	4	3	6	5	4	3	3	4	3	3	3	3	4	6	5	3	3	2
chr15	347862	349197	2	2	2	2	2	2	2	2	2	2	1	2	2	2	2	2	2	2	2	2	2	2	2	2	2	2	1	2	2	2	2	2	2	2	2	2	2	2	2	2	2	2	2	2	2	2	2
chr15	5008786	5009818	2	2	2	2	2	2	2	2	2	2	2	2	2	2	2	2	3	3	3	2	2	2	2	3	3	2	2	2	2	2	2	3	2	3	2	3	3	2	3	3	2	2	2	2	3	2	2
chr15	5871521	5872737	2	2	2	2	2	2	2	2	2	2	2	2	2	2	1	1	2	2	2	2	2	2	2	2	2	2	1	2	2	2	2	2	2	2	2	2	2	2	2	2	2	2	2	2	2	2	2
chr15	5949480	5950480	2	2	2	2	2	2	2	2	2	2	2	2	2	2	2	2	2	2	2	2	2	2	3	2	2	2	2	2	2	3	2	2	3	2	2	2	2	2	2	2	2	2	2	2	2	2	2
chr15	6828880	6830163	2	2	2	2	2	2	2	2	1	2	2	2	2	2	2	2	2	2	2	2	2	2	2	3	2	2	2	2	2	2	2	2	2	2	1	2	2	2	2	2	2	2	2	2	2	2	2
chr15	6830163	6831316	2	2	1	1	2	2	2	2	2	2	1	2	2	2	2	2	2	2	2	1	2	2	2	2	2	2	1	2	2	2	1	2	2	2	2	2	2	2	2	2	2	2	2	2	1	2	2
chr15	6831316	6832449	2	2	2	2	2	2	2	2	2	2	2	2	2	2	2	2	2	2	2	2	2	2	2	2	2	2	1	2	2	2	2	2	2	2	2	2	2	2	2	2	2	2	2	3	2	2	2
chr15	7851271	7852366	2	2	2	2	2	2	2	2	2	2	2	2	2	2	2	2	2	2	2	2	2	2	2	2	2	2	3	2	2	2	2	2	3	2	3	2	2	2	2	2	2	2	2	2	2	2	2
chr15	7854366	7855421	2	2	2	3	3	2	2	2	2	2	3	2	2	3	2	3	2	2	2	2	2	2	2	2	2	2	3	3	2	2	2	2	3	2	2	2	2	2	2	2	2	2	2	2	2	2	2
chr15	7919712	7920712	2	2	2	2	2	2	2	2	2	2	2	2	2	2	2	2	2	3	3	3	2	2	2	3	3	2	3	2	2	2	3	3	3	2	2	3	2	2	3	2	2	2	3	2	3	2	2
chr15	7921712	7922786	2	2	2	2	2	2	2	2	2	2	2	2	2	2	2	2	2	2	2	2	2	2	2	2	2	2	2	2	2	2	2	2	2	2	2	2	2	2	2	2	2	2	2	2	2	2	2
chr15	7922786	7924842	2	2	2	2	2	2	2	2	2	3	2	2	2	2	2	2	2	2	2	2	2	2	2	2	2	2	2	2	2	2	2	2	2	2	2	2	2	2	2	2	2	2	2	2	2	2	2
chr15	10827004	10828309	2	2	2	2	2	2	2	2	2	2	2	1	2	2	2	2	2	2	2	2	2	2	2	2	2	2	2	2	2	2	2	2	2	2	2	2	2	2	2	2	2	2	2	2	2	2	2
chr15	11100910	11102023	2	2	2	1	2	2	2	2	2	2	2	1	2	2	2	2	2	2	2	2	2	2	2	2	2	2	2	2	2	2	2	2	2	2	2	2	2	2	2	2	2	2	2	2	2	2	2
chr15	11102023	11103076	1	1	1	1	1	1	1	2	1	1	1	1	1	1	1	0	1	1	1	0	2	1	1	1	1	1	0	1	1	1	1	1	1	1	1	1	1	1	1	1	1	1	1	1	1	1	1
chr15	11105342	11106522	2	2	2	2	2	2	2	2	2	1	2	2	2	2	2	2	2	2	1	2	2	2	2	2	2	2	1	2	2	2	2	2	1	2	2	2	2	2	1	2	2	2	2	2	2	2	2
chr15	11107522	11108522	2	1	2	2	2	2	2	2	2	2	2	2	2	2	2	2	2	2	2	1	2	2	2	2	2	2	1	2	2	2	2	2	1	2	2	2	2	2	2	2	2	2	2	2	2	2	2
chr15	12216471	12217471	2	2	2	2	2	2	2	2	3	2	2	3	2	2	2	2	2	2	2	2	2	2	2	2	2	2	2	2	2	2	2	2	2	2	2	2	2	2	2	2	2	2	2	2	2	2	2
chr15	12219155	12220241	1	1	1	1	1	1	1	1	1	1	1	1	1	1	1	1	1	1	1	1	1	1	1	1	1	1	0	1	1	1	1	1	1	1	1	1	1	1	1	1	1	2	1	1	1	1	1
chr15	12313876	12315040	1	1	1	1	1	1	1	1	1	1	1	1	1	1	0	0	1	1	1	0	1	1	1	1	1	1	0	1	1	1	1	1	0	1	1	1	1	1	1	1	1	1	1	1	1	1	1
chr14	989558	990600	2	2	2	2	2	2	2	2	2	2	1	2	2	2	2	1	2	2	2	2	2	2	2	2	2	2	2	2	2	2	2	2	2	2	2	2	2	2	2	2	2	2	2	2	2	2	2
chr14	4123386	4124420	2	2	2	2	2	2	2	2	2	2	2	2	2	2	2	2	2	2	2	2	2	2	2	2	2	2	2	2	2	2	2	2	2	2	2	2	2	2	2	2	2	2	2	2	2	2	2
chr14	4133962	4134962	2	2	2	2	2	2	2	2	2	2	2	2	2	2	2	2	2	2	2	2	2	2	2	3	2	2	2	2	2	2	2	2	1	2	2	2	2	2	2	2	2	2	2	2	2	2	2
chr14	4343857	4344936	2	2	2	2	2	2	2	2	2	2	2	2	2	3	2	2	3	3	2	2	2	2	2	2	2	3	2	3	2	2	3	2	2	2	2	2	3	2	2	2	2	2	3	2	3	3	2
chr14	4431041	4432073	2	2	2	2	2	2	2	2	2	1	2	1	1	2	2	2	2	2	2	2	2	2	2	2	2	2	2	2	2	2	2	2	2	2	2	2	2	2	2	2	2	2	2	2	2	2	2
chr14	4884375	4885694	2	2	2	2	2	2	2	2	2	2	2	2	2	1	2	2	2	2	2	2	2	2	2	1	2	2	1	2	2	2	2	1	2	2	2	2	2	2	2	2	2	2	2	2	2	2	2
chr14	4896232	4897291	2	2	2	2	2	2	2	2	2	2	2	1	2	2	2	2	2	2	2	3	2	2	2	2	2	2	1	2	2	2	2	2	2	2	1	2	2	2	2	2	2	2	2	2	2	3	2
chr14	13676225	13677225	2	3	2	2	2	3	2	2	2	2	2	3	2	2	3	2	3	2	2	2	2	1	2	2	2	2	2	2	2	2	2	3	2	2	1	2	2	3	2	2	2	2	2	2	2	2	2
chr14	13679472	13680472	2	2	2	2	2	2	3	2	2	2	2	3	2	2	2	2	2	3	2	2	2	1	2	3	3	2	3	2	2	2	2	3	2	1	2	2	2	2	2	2	2	2	2	2	3	3	2
chr14	13690568	13691999	2	2	2	2	2	2	2	2	2	2	2	2	2	2	2	2	2	2	2	2	2	2	2	2	2	2	2	2	2	2	2	2	2	2	2	2	2	2	2	2	2	2	2	2	2	2	2
chr14	13734925	13736214	2	2	2	2	2	2	2	2	2	2	2	2	2	2	2	1	2	2	2	1	2	2	2	2	1	2	1	2	2	2	2	2	2	2	2	2	2	2	2	2	2	2	2	2	2	2	2
chr13	7762216	7763216	2	2	2	2	2	2	2	2	2	2	2	2	2	2	2	2	2	2	2	2	2	3	2	2	2	2	3	2	2	2	2	2	2	2	2	2	2	2	2	2	2	2	2	2	2	2	2
chr13	9135270	9136270	2	2	3	2	2	2	2	2	2	2	2	2	2	2	2	2	2	2	2	2	2	2	2	2	2	2	2	2	3	2	2	2	2	2	3	2	2	2	2	2	2	2	2	2	2	2	2
chr13	9755758	9756758	2	2	2	2	2	2	2	2	2	2	2	2	2	2	2	2	2	2	2	3	2	2	2	2	2	2	2	2	2	2	2	3	3	2	2	2	2	3	2	2	2	2	2	2	2	2	2
chr13	11825369	11826403	1	1	1	1	1	1	1	2	1	1	1	1	1	1	1	1	1	1	1	1	2	1	1	1	1	1	1	1	1	1	1	1	1	1	1	1	2	1	1	1	1	1	1	1	1	1	2
chr13	17236719	17237719	2	3	2	2	2	2	2	2	2	2	2	2	2	2	3	3	2	2	2	3	2	2	3	2	2	2	2	2	2	3	2	3	2	2	2	2	2	2	3	2	3	2	2	2	2	2	2
chr12	16856	17856	3	4	2	4	3	3	4	2	3	2	4	5	2	4	2	2	2	2	2	2	2	2	4	2	3	2	2	4	2	3	3	2	3	3	4	4	2	3	2	3	2	2	4	3	3	4	2
chr12	19856	21448	4	5	5	6	4	5	5	4	4	3	5	7	3	5	4	4	4	5	4	4	4	4	7	4	4	3	5	5	3	5	5	4	6	3	5	5	3	5	4	5	4	5	5	5	4	6	4
chr12	22448	23448	4	5	3	5	3	5	5	5	4	4	5	7	4	5	4	4	4	4	4	4	3	4	6	3	5	3	4	4	3	4	5	4	6	4	4	5	4	6	4	6	4	5	4	5	4	4	4
chr12	24448	25448	5	4	6	6	4	5	6	4	4	4	5	6	5	5	5	5	4	5	5	4	3	4	7	4	4	4	4	5	4	4	5	5	6	4	6	4	4	5	4	6	4	4	5	5	6	6	4
chr12	25448	26525	4	4	3	4	3	4	4	4	3	3	3	4	3	3	3	2	3	3	2	3	3	3	4	4	4	4	2	3	3	3	3	3	3	5	3	3	4	3	3	3	4	4	4	5	4	4	4
chr12	54274	55274	6	5	4	5	5	4	5	4	4	4	7	7	4	5	5	4	4	4	4	4	4	4	6	5	5	5	4	6	4	5	5	5	4	4	5	6	4	6	4	4	4	5	5	5	5	5	4
chr12	61329	62329	6	6	6	7	4	5	6	4	5	5	6	8	5	6	5	5	5	4	5	4	5	4	7	3	5	4	5	6	4	5	5	4	5	4	5	7	5	6	5	7	4	6	5	5	6	6	4
chr12	64403	65791	4	3	3	4	3	2	3	3	2	2	4	5	3	3	2	2	3	2	3	3	3	3	4	3	3	3	3	3	2	3	3	2	3	3	4	3	3	3	3	3	3	3	3	4	3	4	4
chr12	71237	72312	3	3	2	3	2	2	3	3	2	2	3	3	2	3	2	2	2	2	2	2	3	2	4	2	3	2	2	3	2	2	2	1	2	3	3	2	2	2	2	3	2	2	3	3	3	3	3
chr12	1221563	1222563	4	4	5	7	4	4	4	5	3	4	5	4	3	5	4	5	3	3	5	4	4	4	4	4	4	4	8	3	3	3	4	5	7	4	4	3	4	5	4	4	4	4	3	4	4	3	4
chr12	2719756	2720756	3	3	3	4	4	3	3	3	2	3	3	4	3	4	3	4	3	3	4	5	3	4	3	3	3	3	4	3	3	3	3	4	4	3	3	2	3	3	3	2	3	3	3	3	3	3	3
chr12	2722756	2723756	4	4	4	5	4	3	3	4	4	4	4	4	4	4	5	5	5	3	6	5	4	4	4	4	4	3	7	4	3	3	4	6	6	4	4	4	4	4	4	3	3	4	3	4	4	3	4
chr12	2744607	2745738	9	11	11	11	12	7	9	9	5	10	9	12	9	13	17	17	11	11	17	18	12	13	8	13	11	9	23	8	9	9	9	14	12	11	10	7	11	11	12	7	8	8	10	11	7	8	8
chr12	2913773	2914773	3	4	4	5	4	3	3	4	3	4	4	4	4	4	4	6	4	3	5	5	3	4	3	3	4	3	8	4	3	3	3	6	6	3	4	4	4	4	4	3	3	3	4	4	3	3	3
chr12	3186852	3188008	2	2	2	2	2	2	2	2	2	2	2	2	2	2	1	2	2	2	2	2	2	2	2	2	2	2	1	2	2	2	2	2	2	2	2	2	2	2	2	2	2	2	2	2	2	2	2
chr12	3189386	3190453	2	2	2	2	2	2	2	2	2	2	2	2	2	2	2	2	2	2	2	2	1	2	2	2	2	2	2	2	2	2	2	2	2	2	2	2	2	2	2	2	2	2	2	2	2	2	3
chr12	3191453	3192547	2	2	2	2	2	2	2	2	2	2	2	2	2	2	2	1	1	2	2	1	2	2	2	2	2	2	0	2	2	2	2	2	2	2	2	2	2	2	2	2	2	2	2	2	2	2	2
chr12	3234120	3235493	2	2	2	2	2	2	2	2	2	2	2	2	2	2	2	2	2	2	2	2	2	2	2	2	2	2	1	2	2	2	2	2	2	2	2	2	2	2	2	2	2	2	2	2	2	2	2
chr12	9090876	9092168	2	2	2	2	2	2	2	2	2	2	2	2	2	1	2	2	2	2	2	2	2	2	2	2	2	2	2	2	2	2	2	2	2	2	1	2	2	2	2	2	2	2	2	2	2	2	2
chr12	11536661	11538090	2	2	2	2	2	2	2	2	2	2	2	2	2	1	2	3	2	2	2	2	2	2	2	2	2	2	2	2	2	2	2	2	2	2	2	2	2	2	2	2	2	2	2	2	2	2	2
chr12	11555061	11556153	2	2	2	2	2	2	2	2	2	2	2	2	2	2	2	2	2	2	2	2	2	2	2	2	3	2	2	2	2	2	2	2	2	2	2	2	2	2	2	2	2	2	2	2	2	2	2
chr12	11577344	11578693	2	2	2	2	2	2	2	2	2	2	2	2	2	2	2	2	2	2	2	2	2	2	2	2	2	2	2	2	2	2	1	2	2	2	2	2	2	2	2	2	2	2	2	2	2	2	2
chr12	11581872	11582954	2	2	2	2	2	2	2	2	2	2	2	2	2	2	2	1	2	2	2	2	2	2	2	2	2	2	2	2	2	2	2	2	2	2	2	2	2	2	2	2	2	2	2	2	2	2	2
chr12	11683454	11684454	2	2	2	1	2	2	2	2	2	2	2	2	2	2	2	2	2	2	2	2	2	2	2	2	2	2	1	2	2	2	2	2	2	2	2	3	2	2	2	2	2	2	2	2	2	3	2
chr12	18590238	18591379	2	2	2	2	2	2	2	2	2	2	2	2	2	2	2	2	2	2	2	2	2	2	2	2	2	2	1	2	2	2	2	1	2	2	2	2	2	2	2	2	2	2	2	2	2	2	2
chr12	19868227	19870733	3	3	3	4	4	4	4	3	3	3	3	4	3	3	3	2	2	2	2	3	3	4	4	3	2	2	6	3	4	4	3	2	3	2	3	3	3	3	3	3	3	3	3	4	3	3	6
chr12	19877052	19880092	20	22	22	26	21	20	20	18	18	20	22	23	17	21	23	20	18	16	19	18	20	20	19	21	17	20	33	16	18	17	18	18	20	22	23	17	17	15	17	19	19	19	21	22	20	18	21
chr12	19884929	19885929	36	33	40	40	32	29	29	25	17	22	36	38	20	29	37	35	25	16	27	32	33	30	23	25	27	29	46	16	21	20	21	26	30	28	31	23	18	29	23	27	32	22	27	38	26	20	36
chr11	7616	8616	44	73	53	91	82	57	67	58	48	55	53	76	68	73	78	86	68	58	105	92	56	73	90	60	66	64	129	60	87	78	86	89	74	34	61	48	69	81	67	55	51	48	64	94	69	55	88
chr11	9616	10616	11	15	12	17	16	10	11	10	11	12	18	20	13	18	23	28	19	15	27	23	14	17	18	14	15	16	25	11	15	16	17	23	19	9	18	11	15	18	16	14	14	12	16	20	13	13	16
chr11	11616	13243	3	3	3	4	5	3	4	4	3	3	3	4	4	3	3	3	3	2	4	4	4	4	5	3	2	2	5	3	4	4	4	3	2	2	3	3	3	4	4	3	2	2	3	4	3	3	6
chr11	13243	14276	2	3	3	3	3	3	3	3	2	2	3	3	2	2	2	2	2	2	3	2	3	2	3	3	2	3	3	2	2	2	3	2	1	2	3	3	3	2	2	3	3	3	3	3	3	3	3
chr11	616130	617130	2	2	2	2	2	2	2	2	2	1	2	2	2	2	2	2	2	2	2	2	2	2	2	2	2	2	1	2	2	2	2	2	2	1	1	2	2	2	2	2	1	2	2	2	2	2	2
chr11	748810	750059	6	11	7	9	7	6	6	8	6	6	2	5	2	5	6	7	2	7	2	3	2	2	6	2	7	9	11	5	4	4	5	10	7	6	2	6	6	2	7	4	4	5	7	5	6	3	4
chr11	751116	752116	8	13	9	9	9	8	10	10	8	6	2	8	2	7	8	8	3	11	2	3	2	3	6	3	7	9	12	6	4	6	6	10	8	8	2	10	7	4	9	4	5	5	6	5	5	4	5
chr11	754116	755116	22	29	27	27	27	27	22	24	21	14	7	17	5	13	22	30	12	34	7	6	5	5	20	7	17	29	60	16	10	17	16	34	33	20	12	20	21	15	32	9	16	15	20	19	14	16	16
chr11	755116	756116	28	35	36	32	36	39	27	33	36	18	7	22	6	15	22	29	16	49	7	7	7	7	24	9	19	38	44	27	13	23	23	35	29	26	17	34	29	17	38	12	19	22	25	22	18	24	22
chr11	1039921	1041581	3	4	4	4	4	3	3	3	3	4	4	5	4	5	5	6	4	4	4	5	3	4	4	6	5	4	7	4	4	4	4	6	6	4	4	3	4	3	5	4	4	3	4	4	3	3	3
chr11	1043886	1044886	5	4	5	6	4	5	4	3	5	5	6	6	5	6	6	7	4	5	5	5	3	4	5	7	6	6	7	5	5	5	6	8	8	6	5	4	5	4	6	4	5	4	4	4	5	4	3
chr11	1044886	1046049	4	4	5	5	4	4	3	4	4	4	5	5	4	5	5	6	4	4	4	5	3	4	5	6	6	5	7	4	4	4	4	7	6	5	4	3	5	3	5	4	4	4	5	4	4	3	4
chr11	1047049	1048271	5	4	5	6	5	4	3	4	4	5	6	6	5	6	6	7	5	5	5	6	3	4	6	5	5	6	8	5	5	5	6	8	5	6	5	4	5	4	6	4	4	4	4	4	4	4	3
chr11	1048271	1049467	4	4	5	6	4	4	3	4	4	5	5	5	4	5	5	6	4	4	4	5	3	4	5	5	5	5	7	4	4	4	5	7	5	6	4	4	4	3	5	4	4	4	5	4	4	3	6
chr11	1054484	1055484	6	5	7	7	6	5	5	5	4	6	6	6	5	7	8	10	6	7	7	8	5	6	6	7	6	6	9	5	6	6	7	9	7	7	5	5	5	4	7	4	5	4	4	5	5	5	4
chr11	1058635	1059736	6	5	6	7	6	5	5	5	4	5	6	6	5	6	7	10	7	7	8	8	5	6	6	7	5	6	7	5	5	5	6	9	6	7	5	4	5	4	7	4	4	4	4	4	4	4	3
chr11	1060494	1061494	5	5	5	7	5	4	4	5	4	5	5	6	4	6	6	7	5	5	7	7	5	6	5	7	5	5	7	5	5	5	5	7	6	6	4	4	4	4	6	4	4	3	4	4	4	4	5
chr11	1063986	1064986	2	2	2	2	2	2	2	2	2	2	2	2	2	2	2	2	2	2	2	2	2	2	2	1	2	2	2	2	2	2	2	2	2	2	2	2	2	2	2	2	2	2	2	2	2	2	2
chr11	2680471	2681471	10	7	11	11	7	5	6	4	8	6	15	15	10	15	6	8	7	6	13	8	10	8	6	14	6	8	6	9	6	8	7	14	7	6	8	5	9	9	5	6	4	7	8	11	4	6	4
chr11	2685043	2686824	8	5	8	8	5	4	4	5	9	5	11	12	9	12	4	4	6	5	9	5	10	7	5	9	4	6	4	10	5	7	6	10	4	6	6	4	8	7	4	5	3	6	5	7	3	5	11
chr11	3172703	3173747	2	2	2	2	2	2	2	2	2	1	2	1	2	2	1	2	2	1	1	1	3	2	2	2	2	2	2	1	1	2	2	2	2	2	2	2	2	1	2	2	2	2	2	2	1	2	2
chr11	10628348	10629498	2	2	2	2	2	2	2	2	2	2	2	2	2	2	2	2	2	2	2	2	2	2	2	2	2	2	2	2	2	2	2	2	2	2	2	2	2	2	2	2	2	2	2	2	2	2	2
chr11	11326535	11327535	2	2	2	2	2	3	2	2	2	2	2	2	2	2	2	2	2	2	2	2	2	2	2	1	2	1	2	1	2	1	2	2	2	2	2	2	2	2	2	2	2	2	2	2	2	2	2
chr11	17980727	17981837	2	2	1	2	2	2	2	2	2	2	2	2	2	2	3	2	3	3	2	2	3	2	3	2	2	2	1	2	2	2	2	2	2	2	2	2	2	2	2	2	2	2	2	2	2	2	2
chr11	17981837	17982837	2	2	1	2	2	2	2	2	2	2	2	2	2	2	2	2	3	3	2	2	2	2	3	2	2	3	1	2	2	2	2	2	2	2	2	2	2	2	2	3	2	2	2	2	2	2	2
chr11	18005648	18006687	2	2	2	2	2	2	2	2	2	2	2	2	2	2	2	2	2	2	2	2	2	2	2	2	2	2	2	2	2	2	2	2	2	2	2	2	2	2	2	2	2	2	2	2	2	2	2
chr11	18108185	18109392	2	2	2	2	2	2	2	2	2	2	2	2	2	2	2	2	2	2	2	3	2	2	2	2	3	2	2	2	2	2	2	2	2	2	2	2	2	2	2	2	2	2	2	2	2	2	2
chr11	18395533	18396639	2	2	2	2	2	2	2	2	2	2	2	2	2	2	2	2	2	2	2	2	2	2	2	2	2	2	2	2	2	2	2	2	2	2	2	2	2	2	2	2	2	2	2	2	2	2	2
chr11	19204376	19205408	2	2	1	2	2	2	2	2	2	2	2	2	2	1	2	3	2	2	2	2	2	2	3	2	2	2	2	2	2	2	3	2	2	2	2	2	2	2	2	2	2	2	2	2	2	2	2
chr11	19238698	19239698	3	2	2	2	2	2	2	3	2	2	3	2	2	3	3	3	3	2	3	2	2	3	3	3	3	2	2	3	3	2	3	2	3	3	3	3	3	3	3	2	3	2	2	2	3	3	2
chr10	20216	21262	6	5	5	6	5	4	5	5	5	4	5	6	4	5	5	4	5	5	5	4	5	6	7	3	3	3	7	4	3	4	3	5	5	4	5	3	4	5	5	5	5	5	4	5	4	4	7
chr10	21262	22262	4	5	4	5	4	4	4	4	4	3	4	6	3	5	4	3	3	3	3	3	3	4	6	2	3	3	5	4	3	3	3	4	3	3	4	3	3	5	3	4	3	3	4	5	5	4	4
chr10	22262	23262	26	19	20	24	21	14	19	18	17	13	20	29	17	17	22	21	25	22	18	14	20	29	24	13	17	15	22	15	12	15	17	28	24	14	22	12	15	21	26	18	20	18	17	26	14	15	32
chr10	23262	24669	17	13	15	18	15	10	12	10	11	9	15	21	11	13	15	15	17	12	13	9	12	17	14	8	11	8	13	11	6	9	13	19	17	8	16	8	11	16	16	12	13	12	12	17	9	10	17
chr10	24669	25669	4	3	4	4	4	3	3	3	3	3	4	5	3	4	3	3	3	3	3	3	4	3	4	3	4	3	4	4	3	3	3	4	4	3	4	3	3	4	3	3	3	3	4	4	3	3	3
chr10	35853	36910	4	4	4	5	4	4	4	4	4	3	5	6	3	4	3	3	4	3	3	3	4	4	5	3	4	2	4	5	3	4	4	4	4	3	4	4	4	4	4	4	3	3	4	5	4	4	3
chr10	39910	41502	4	4	5	5	4	5	5	4	4	3	5	7	3	4	4	4	4	4	3	4	3	3	6	4	4	3	5	4	3	5	5	4	6	3	5	5	3	4	4	5	4	4	5	5	4	6	4
chr10	42502	43502	4	5	3	5	3	5	5	4	4	4	5	7	4	5	4	4	4	4	4	4	3	4	6	3	5	3	4	5	3	4	5	4	6	4	4	5	4	6	4	6	4	5	4	5	4	4	4
chr10	49578	50578	6	5	4	5	5	3	5	4	4	4	5	6	4	5	4	3	4	4	4	3	4	4	6	4	5	4	3	5	4	5	5	4	4	4	5	5	4	5	5	5	4	4	5	5	5	6	4
chr10	55695	56727	6	6	5	5	4	5	5	3	4	4	5	6	5	6	4	4	4	3	4	4	4	4	5	3	4	3	4	5	3	5	5	3	4	4	5	5	4	5	5	6	4	5	4	5	6	6	4
chr10	56727	57765	4	4	4	5	3	4	4	4	4	3	4	6	4	4	4	3	3	4	4	4	4	4	5	3	4	3	5	4	4	3	4	3	3	4	4	5	3	4	3	4	4	4	4	4	4	5	4
chr10	59802	61211	4	4	3	4	3	3	3	3	3	3	4	5	3	4	3	2	3	3	4	2	3	3	5	2	3	2	3	3	3	4	2	3	3	3	4	4	3	3	3	4	3	3	3	4	4	4	3
chr10	61211	62211	4	3	3	5	3	3	4	3	3	3	5	5	3	5	3	3	3	2	4	2	3	3	4	2	4	2	5	4	3	4	3	3	4	3	4	3	3	3	3	4	3	3	3	3	4	4	4
chr10	278920	279920	2	2	2	2	2	2	2	2	2	2	2	2	2	2	2	2	2	2	2	2	2	2	2	2	2	2	3	2	2	2	2	2	3	2	3	2	2	3	2	2	2	3	2	2	2	2	2
chr10	660051	661051	2	2	2	2	2	2	2	2	2	2	2	3	2	2	2	2	2	2	2	2	2	2	2	2	2	2	2	2	2	2	2	2	2	2	2	2	3	2	2	2	2	2	2	2	2	2	2
chr10	3276243	3277243	2	2	2	2	2	3	2	1	2	2	2	2	1	2	2	3	2	3	2	2	2	2	2	3	2	2	2	3	2	3	2	2	2	2	2	2	2	2	3	2	2	2	3	2	2	2	2
chr10	7139278	7140278	3	3	3	2	3	3	3	2	3	3	3	2	2	3	3	3	3	3	3	3	2	2	3	3	3	3	3	3	3	3	3	3	3	2	2	3	3	3	3	3	2	3	3	3	3	3	2
chr10	12375574	12376746	2	2	2	2	2	2	2	2	2	2	2	2	2	2	2	1	2	2	2	2	2	2	2	2	2	2	1	2	2	2	2	2	2	2	2	2	2	2	2	2	2	2	2	2	2	2	2
chr10	15335841	15337022	1	1	1	1	1	2	1	1	1	1	1	1	1	1	1	1	1	1	1	0	1	1	1	1	1	1	0	1	1	1	1	0	1	1	1	1	1	1	1	1	2	1	2	1	1	1	1
chr10	18828033	18829118	2	2	1	2	2	2	2	2	2	2	2	1	2	2	2	2	2	2	2	2	1	2	2	2	2	2	1	2	2	2	2	2	2	2	1	2	2	2	2	2	2	2	2	2	2	2	2
chr1	632466	633950	2	2	2	2	2	2	2	1	2	2	2	2	2	2	2	3	2	2	2	2	2	2	2	2	2	2	2	2	2	2	2	2	2	2	2	2	2	2	2	2	2	2	2	2	2	2	2
chr1	636172	637769	2	2	2	2	2	2	2	2	2	2	2	2	2	2	2	2	2	2	2	2	2	2	2	2	2	2	1	2	2	2	2	2	2	2	2	2	2	2	2	2	2	2	2	2	2	2	2
chr1	1839142	1840142	5	6	6	9	8	5	5	5	4	4	7	6	4	5	7	8	5	4	7	7	5	6	5	4	5	4	10	4	4	4	4	8	7	5	5	3	5	6	7	4	3	4	4	4	4	4	6
chr1	1971504	1972561	24	26	26	30	25	17	23	16	29	30	32	34	22	47	29	30	22	18	25	27	23	27	20	19	26	23	47	17	18	18	18	38	40	19	26	16	22	30	25	20	23	25	20	29	21	26	15
chr1	3452954	3454077	2	2	2	1	2	2	2	2	2	2	2	2	2	2	2	1	2	2	1	2	2	2	2	2	2	2	1	2	2	2	2	2	2	1	2	2	2	2	2	2	2	2	2	2	2	2	2
chr1	3978679	3979679	18	11	16	20	20	10	15	14	13	16	18	22	15	24	22	24	17	16	24	25	14	18	16	6	16	13	16	10	6	11	11	16	21	22	22	10	12	26	18	14	14	14	14	20	13	15	17
chr1	3991588	3992588	25	22	26	31	29	17	24	17	22	25	28	31	21	34	30	35	23	20	29	36	22	27	20	12	22	19	21	15	12	16	18	28	32	25	30	16	21	39	29	20	18	20	18	29	19	22	14
chr1	4289348	4290448	2	2	2	2	2	2	2	2	2	2	2	2	2	2	2	2	2	2	1	2	2	2	2	1	2	2	1	2	2	2	2	2	2	2	2	2	1	1	2	2	2	2	2	2	2	2	2
chr1	6031187	6032413	2	2	2	2	2	2	2	2	2	2	2	1	2	2	2	1	2	2	2	2	1	2	2	2	2	2	2	2	2	2	2	2	2	2	2	3	2	2	2	2	2	2	2	2	2	2	2
chr1	8874488	8876461	1	1	1	1	1	1	1	1	1	1	1	2	1	1	2	1	1	1	1	1	1	1	1	1	1	1	2	1	1	1	1	1	1	1	1	1	1	1	1	1	1	1	1	1	1	2	2
chr1	11217126	11219384	2	2	2	2	2	2	2	2	2	2	2	3	2	2	2	2	2	1	2	2	2	2	2	2	2	2	2	2	2	2	2	1	2	1	2	2	2	2	2	1	1	1	1	2	2	2	2
chr1	18656996	18658099	2	2	2	2	2	2	2	2	2	2	2	2	2	2	2	2	2	2	2	2	2	2	2	2	2	2	2	2	2	2	2	2	2	2	2	2	2	2	2	2	2	2	2	2	2	2	2
chr1	20071620	20072988	2	2	1	2	2	2	2	2	2	2	1	1	2	2	2	2	2	2	2	1	2	2	2	2	2	2	1	2	2	2	2	2	2	2	2	2	2	2	2	2	2	2	2	2	2	2	2
chr1	28084199	28085199	2	2	1	2	1	1	1	1	1	1	1	1	2	1	1	1	1	1	1	1	1	1	1	1	1	1	1	1	1	1	1	1	1	2	1	1	1	1	1	1	1	1	1	1	1	1	2
chr1	37697797	37699223	2	2	2	2	2	2	2	2	2	2	2	2	2	2	2	2	2	2	2	2	2	2	2	1	2	2	2	2	2	2	2	1	2	2	2	2	2	2	2	2	2	1	2	2	2	2	2
chr1	47629890	47631012	1	2	2	2	2	1	2	2	2	2	2	2	2	2	3	2	2	2	2	2	2	2	2	2	2	2	2	2	2	2	2	2	2	2	2	2	2	2	2	2	1	1	2	1	2	2	2
chr1	47933762	47934762	4	5	5	4	4	4	4	2	4	5	4	4	4	7	5	6	4	3	5	5	4	4	4	5	5	4	5	3	4	3	5	5	5	4	4	4	5	4	5	4	4	4	4	4	4	4	1
chr1	47933762	47934762	4	5	5	4	4	4	4	2	4	5	4	4	4	7	5	6	4	3	5	5	4	4	4	5	5	4	5	3	4	3	5	5	5	4	4	4	5	4	5	4	4	4	4	4	4	4	1
chr1	47934762	47935762	5	5	5	5	4	4	4	3	4	6	5	5	4	6	6	7	5	5	6	7	4	4	4	5	5	5	6	4	4	4	5	6	6	4	4	4	5	5	5	4	4	4	5	5	5	4	2
chr1	47934762	47935762	5	5	5	5	4	4	4	3	4	6	5	5	4	6	6	7	5	5	6	7	4	4	4	5	5	5	6	4	4	4	5	6	6	4	4	4	5	5	5	4	4	4	5	5	5	4	2
chr1	47974260	47975260	4	5	5	5	4	4	4	3	4	5	5	5	4	6	6	6	4	4	5	6	4	5	4	5	5	4	7	4	4	4	5	6	6	4	4	4	5	5	5	4	4	4	4	4	4	4	2
chr1	47974260	47975260	4	5	5	5	4	4	4	3	4	5	5	5	4	6	6	6	4	4	5	6	4	5	4	5	5	4	7	4	4	4	5	6	6	4	4	4	5	5	5	4	4	4	4	4	4	4	2
chr1	47978260	47979260	5	5	5	5	4	4	4	3	4	6	5	4	4	6	6	6	5	4	6	6	4	4	4	6	5	5	6	4	4	5	5	6	6	5	3	4	5	5	5	4	4	4	5	4	4	4	2
chr1	47978260	47979260	5	5	5	5	4	4	4	3	4	6	5	4	4	6	6	6	5	4	6	6	4	4	4	6	5	5	6	4	4	5	5	6	6	5	3	4	5	5	5	4	4	4	5	4	4	4	2
chr1	47993752	47994752	4	4	4	5	4	4	4	3	4	5	5	4	4	5	6	6	5	4	4	6	5	4	4	5	5	4	5	4	4	4	4	7	5	4	4	4	4	4	5	4	4	4	4	5	4	4	2
chr1	47993752	47994752	4	4	4	5	4	4	4	3	4	5	5	4	4	5	6	6	5	4	4	6	5	4	4	5	5	4	5	4	4	4	4	7	5	4	4	4	4	4	5	4	4	4	4	5	4	4	2
chr1	47995752	47996797	4	4	5	5	4	4	4	2	4	5	5	4	4	6	5	6	4	4	5	5	3	4	3	5	5	4	6	4	4	4	5	6	5	4	3	4	5	4	5	3	4	4	4	4	4	4	1
chr1	47995752	47996797	4	4	5	5	4	4	4	2	4	5	5	4	4	6	5	6	4	4	5	5	3	4	3	5	5	4	6	4	4	4	5	6	5	4	3	4	5	4	5	3	4	4	4	4	4	4	1
chr1	48029356	48030356	5	5	6	6	5	5	5	3	4	6	5	5	4	7	7	8	5	5	6	7	5	5	4	6	6	5	6	4	5	5	5	6	7	4	4	4	6	5	6	4	5	5	5	5	5	5	2
chr1	49409383	49411462	2	2	2	2	2	2	2	2	2	2	2	2	2	2	2	2	2	2	2	2	2	2	2	2	2	2	2	2	2	2	2	2	2	2	2	2	2	2	2	2	2	2	2	2	2	2	2
chr1	49409383	49411462	2	2	2	2	2	2	2	2	2	2	2	2	2	2	2	2	2	2	2	2	2	2	2	2	2	2	2	2	2	2	2	2	2	2	2	2	2	2	2	2	2	2	2	2	2	2	2
chr1	49426044	49427814	2	2	1	2	2	2	2	2	2	2	2	2	2	2	2	2	3	2	2	2	2	2	2	2	2	2	2	3	2	2	2	2	2	2	2	2	2	2	2	1	2	2	2	1	2	2	2
chr1	49474765	49475876	2	2	2	2	2	2	2	2	2	2	1	1	1	2	2	2	2	2	2	2	2	2	2	3	3	2	2	2	2	2	2	2	2	2	2	2	2	2	2	2	2	2	2	2	2	1	2
chr1	49511636	49512671	3	2	2	2	2	2	2	2	2	2	2	2	2	2	3	2	3	2	2	2	3	2	2	2	2	3	2	2	2	2	2	2	2	2	2	2	2	2	2	2	2	2	2	2	2	2	2
chr1	51454089	51455140	2	2	2	2	2	2	2	2	2	2	2	2	2	2	2	2	1	2	2	2	2	2	2	2	2	2	0	2	2	2	2	2	2	2	2	2	2	2	2	2	2	2	2	2	2	2	2
chr1	51496058	51497058	2	2	2	2	2	2	2	1	2	3	2	2	2	2	2	1	2	2	2	2	2	2	2	2	2	1	2	2	2	2	2	1	2	2	2	2	2	2	2	2	2	2	2	2	2	2	2
chr1	59331909	59333085	7	13	10	9	6	6	9	7	10	13	12	18	12	19	12	13	9	10	12	16	9	6	6	5	12	8	14	5	4	8	9	15	12	8	8	7	9	11	9	9	9	9	7	8	6	9	5
chr1	59331909	59333085	7	13	10	9	6	6	9	7	10	13	12	18	12	19	12	13	9	10	12	16	9	6	6	5	12	8	14	5	4	8	9	15	12	8	8	7	9	11	9	9	9	9	7	8	6	9	5
chr1	64023211	64024830	2	2	2	2	2	2	2	2	2	2	2	2	2	2	2	2	2	2	2	2	2	2	2	2	2	2	2	2	2	2	2	2	2	2	2	2	2	2	2	2	2	2	2	2	3	2	2
chr1	67258871	67261196	4	5	5	5	5	4	5	3	4	5	6	4	4	5	6	5	5	4	6	6	5	4	4	5	5	5	5	4	4	4	4	4	5	4	4	4	4	4	4	5	4	4	4	6	4	4	3
chr1	67401619	67402619	2	2	2	2	2	2	2	2	2	2	2	2	2	2	2	2	2	2	2	2	2	2	2	2	2	2	3	2	2	2	2	2	2	2	2	2	2	2	2	2	2	2	2	2	2	2	2
chr1	67407577	67408577	12	16	17	21	20	10	15	12	10	14	21	17	14	18	18	18	15	11	23	18	14	16	14	14	16	14	32	9	12	10	12	19	18	12	15	9	11	13	15	14	11	12	12	20	11	12	11
chr1	67408577	67409925	5	7	6	8	7	5	7	4	5	7	8	7	5	6	9	7	6	6	9	8	7	7	6	6	7	7	7	4	6	5	5	5	7	5	6	5	4	5	6	6	5	6	6	7	5	6	4
chr1	72423756	72424922	1	1	1	1	1	1	1	1	0	0	1	1	1	1	1	1	1	1	1	1	2	1	1	1	1	1	1	1	1	1	1	1	1	2	1	1	0	1	1	1	1	1	1	1	1	1	2
chr1	74596705	74597705	4	3	4	5	4	3	4	3	3	4	4	4	4	5	4	4	3	3	3	4	3	4	4	4	4	3	4	3	3	3	3	4	3	4	4	3	3	3	3	4	3	3	4	4	3	3	4
chr1	75243683	75244683	3	3	2	3	3	3	3	2	3	3	3	2	3	3	3	3	4	3	2	3	3	3	3	3	3	4	3	3	3	3	3	3	3	3	2	2	3	3	3	2	3	3	3	3	3	3	2
chr1	76135157	76137902	3	3	4	3	3	2	2	4	3	3	3	2	3	3	3	3	3	3	3	3	3	3	3	3	3	3	5	2	3	3	2	3	3	3	3	3	2	3	2	2	2	3	2	3	3	2	3
chr1	82978461	82979601	2	2	2	2	2	2	2	2	2	2	2	1	2	2	2	3	2	2	2	2	2	2	2	2	2	2	2	2	2	2	2	2	2	2	2	2	2	2	2	2	2	2	2	2	2	2	2
chr1	94406371	94407501	0	0	1	1	0	1	1	1	1	1	1	1	1	1	1	1	1	1	1	1	1	1	1	1	1	1	1	1	1	1	1	1	1	1	0	1	1	1	1	1	1	1	1	1	1	1	1
chr1	94519124	94520738	2	2	2	2	2	2	2	2	2	2	2	2	2	2	2	2	2	2	2	2	3	2	2	2	2	2	3	1	2	2	2	2	2	2	3	2	2	2	2	2	2	2	2	3	2	2	2
chr1	100469833	100471725	4	3	4	4	4	4	4	4	4	5	4	5	4	4	4	4	4	4	4	4	4	4	4	4	4	4	5	4	4	4	3	4	4	4	5	3	4	4	4	5	4	5	4	4	4	5	5
chr1	101149484	101150981	2	2	2	2	2	2	1	2	2	3	2	2	2	2	2	2	2	2	2	2	2	2	2	2	3	2	2	3	2	2	2	2	1	2	2	2	2	2	2	2	2	2	2	3	1	2	2
chr1	110692659	110695317	18	22	25	31	22	15	22	14	16	17	27	23	17	29	27	35	22	17	32	29	19	21	13	18	17	17	35	11	16	14	17	23	32	14	23	17	20	26	21	17	17	17	17	27	16	14	13
chr1	110695317	110696351	37	46	48	65	44	29	40	30	28	34	53	51	33	51	51	59	42	31	59	53	41	50	25	34	34	33	63	25	29	30	37	46	61	30	47	33	36	48	41	29	31	29	35	51	31	28	25
chr1	110700386	110701428	31	33	37	53	34	26	32	29	25	29	41	38	25	39	42	45	36	27	51	42	33	39	22	24	23	23	43	20	26	22	25	36	46	22	36	27	28	37	34	24	24	24	27	40	28	23	25
chr1	112652894	112654403	14	18	17	22	15	11	14	17	12	13	20	20	12	21	21	25	17	14	21	20	16	18	11	13	12	14	30	9	11	11	13	18	24	14	17	12	14	18	14	11	12	11	12	19	10	10	17
chr1	112654403	112655403	41	49	53	70	46	31	44	32	31	36	55	53	34	54	58	71	48	36	63	58	41	45	29	37	37	35	64	26	31	30	38	52	70	31	47	35	40	51	44	34	33	32	36	56	31	29	25
chr1	112672609	112673651	54	60	59	91	56	44	53	50	37	45	65	63	43	63	76	78	61	50	81	74	52	62	43	45	43	44	92	36	44	41	49	64	80	37	60	45	46	65	60	45	42	40	44	68	41	35	47
chr1	113134366	113135408	39	40	45	64	38	29	38	36	28	35	46	45	29	45	52	54	42	35	56	47	39	43	28	28	26	29	55	23	28	27	29	44	54	27	42	32	32	42	42	30	27	30	30	46	29	27	33
chr1	113139521	113140521	42	51	54	73	48	33	47	34	33	39	59	55	37	57	60	73	50	37	66	60	44	51	30	39	38	39	68	27	33	32	41	54	71	34	52	38	41	55	47	37	35	34	38	59	34	31	26
chr1	113140521	113144119	21	27	28	35	24	19	24	24	19	19	31	30	18	31	32	36	28	23	34	31	28	28	16	21	19	20	41	14	18	18	20	26	35	21	26	20	24	29	24	17	20	18	19	30	19	17	25
chr1	113690772	113691827	50	55	59	89	56	36	55	41	41	50	68	69	43	64	74	88	56	42	70	73	45	62	37	46	45	46	102	32	36	38	51	67	77	35	61	43	41	61	57	47	44	44	40	69	37	35	28
chr1	116331261	116332336	35	39	41	61	39	25	38	29	30	37	49	51	31	45	55	64	39	30	52	55	33	45	27	33	32	31	66	22	25	27	36	46	53	24	43	28	29	42	38	33	30	30	28	48	26	25	24
chr1	116332336	116334244	17	20	22	27	18	12	18	16	14	17	23	22	15	22	25	31	21	17	24	24	16	19	14	16	15	17	29	10	13	12	15	23	30	13	21	13	16	22	20	16	16	16	14	23	14	12	16
chr1	121026121	121027163	30	38	34	54	36	30	32	32	25	30	43	39	28	42	43	49	36	28	54	44	38	43	23	24	24	24	57	21	29	24	29	34	50	24	34	28	34	39	33	22	25	24	26	40	28	24	31
chr1	121031201	121032278	32	38	38	54	37	27	33	30	26	32	50	45	31	47	43	50	36	27	51	45	41	49	23	28	27	30	55	21	26	27	31	37	51	28	41	28	34	44	34	26	27	25	29	43	28	26	31
chr1	121032278	121033627	36	45	48	60	43	29	40	31	31	36	54	52	32	53	56	68	44	33	61	56	38	44	25	34	33	34	67	22	28	28	33	48	65	28	42	31	41	49	39	30	32	30	33	52	30	27	26
chr1	122103067	122104067	13	14	15	20	13	12	13	11	9	12	16	15	11	15	18	18	14	12	19	19	12	14	12	11	10	11	20	9	11	10	12	15	19	9	15	10	12	15	14	11	10	10	10	16	11	10	13
chr1	122104067	122105067	5	6	6	7	6	5	5	4	5	6	8	8	5	6	7	6	6	5	7	7	5	6	4	5	4	5	6	4	4	5	5	6	6	4	6	4	6	6	4	5	5	4	4	7	5	4	6
chr1	122204517	122205517	38	45	46	63	42	30	39	28	32	40	61	58	38	56	50	61	41	29	61	54	42	50	27	33	33	37	60	24	28	30	37	45	61	30	45	33	40	49	38	29	33	30	34	50	31	30	24
chr1	122205517	122206718	26	33	33	42	31	21	27	25	23	26	40	39	24	40	38	45	31	24	43	39	27	33	18	23	24	25	54	16	21	20	23	33	46	22	30	22	30	35	27	20	22	19	25	38	20	18	23
chr1	122454502	122458115	20	24	22	28	19	19	18	22	20	19	30	31	21	29	23	26	21	18	28	23	24	26	15	14	15	20	33	12	14	15	17	21	28	18	19	16	21	24	19	13	18	15	18	24	15	14	23
chr1	122458115	122459115	40	50	51	68	46	32	43	30	35	40	64	59	36	61	57	69	45	32	67	61	42	49	27	37	36	38	68	24	31	31	37	51	72	30	48	36	46	53	44	32	34	33	36	57	31	31	26
chr1	122459115	122460115	28	33	32	45	29	25	28	26	26	32	48	42	30	47	33	39	30	24	45	37	36	39	20	23	24	28	34	19	24	24	27	31	41	23	35	27	34	39	27	21	25	20	26	33	25	24	26
chr1	122896074	122897074	17	19	19	29	19	15	17	17	12	14	20	20	13	20	23	23	19	15	25	25	16	20	14	14	13	14	39	12	15	13	16	21	25	13	19	14	15	20	18	14	13	14	14	22	14	13	17
chr1	122897074	122898480	31	38	35	55	34	26	33	31	23	27	41	41	25	35	45	48	33	30	48	44	32	39	26	28	29	28	66	21	27	25	29	40	51	25	37	26	27	40	35	26	26	22	30	42	24	20	31
chr1	122897074	122898480	31	38	35	55	34	26	33	31	23	27	41	41	25	35	45	48	33	30	48	44	32	39	26	28	29	28	66	21	27	25	29	40	51	25	37	26	27	40	35	26	26	22	30	42	24	20	31
chr1	122898480	122899480	45	56	56	76	52	34	48	35	37	45	66	63	39	62	67	81	51	38	71	69	43	54	32	43	41	42	83	29	34	34	44	62	79	31	51	39	44	57	51	36	38	36	40	66	34	31	29
chr1	122904523	122905565	55	61	58	94	58	45	56	51	39	48	65	63	44	63	75	78	59	50	79	74	50	63	45	48	43	45	100	38	44	42	53	68	81	38	60	46	44	63	61	47	43	42	47	74	42	36	46
chr1	123818380	123819463	31	36	35	53	34	21	33	23	27	31	44	45	27	39	44	54	34	25	47	45	30	44	24	30	30	31	57	21	24	24	32	44	50	22	35	26	26	37	34	28	27	24	29	42	23	21	19
chr1	139255330	139256330	3	5	5	4	6	4	5	5	3	4	7	4	6	3	4	5	5	4	4	5	5	5	6	3	3	5	5	3	4	4	4	3	4	5	5	4	4	3	5	5	5	4	4	5	5	5	7
chr1	139363302	139365121	15	23	23	20	29	19	30	20	12	14	32	16	20	13	30	29	23	23	33	27	25	27	26	16	19	21	33	14	8	20	10	15	19	27	18	22	14	17	27	17	20	16	16	27	17	20	36
chr1	139425581	139426581	10	13	14	11	16	12	19	12	7	8	18	9	11	9	18	17	14	14	22	17	16	17	15	10	12	13	16	8	5	14	7	9	11	14	10	14	8	9	16	10	13	10	10	17	11	13	21
chr1	142489909	142491449	1	2	1	1	2	2	2	2	2	1	1	1	1	1	1	1	1	1	1	1	2	1	0	1	1	1	1	1	1	1	1	1	1	2	1	1	1	1	1	2	1	1	1	2	1	1	1
chr1	142614238	142615308	1	1	1	1	1	1	1	1	1	1	1	1	1	1	1	1	1	1	1	1	1	2	1	1	1	1	2	1	1	1	1	1	2	1	1	1	1	1	1	1	1	2	2	1	1	1	2
chr1	146180930	146182034	2	2	2	2	2	2	2	2	2	2	2	2	2	2	2	2	2	2	2	2	2	2	2	1	2	2	2	2	2	2	2	2	2	2	2	2	1	2	2	2	2	2	2	2	2	2	2
chr1	148067992	148069099	22	198	35	334	73	38	628	535	17	7	8	9	40	9	78	161	124	50	234	316	98	150	105	56	62	35	375	117	68	101	80	46	27	25	22	20	55	80	14	99	55	96	154	144	178	145	240
chr1	148072283	148073872	10	75	12	139	25	19	189	104	18	7	10	11	41	10	36	66	51	23	101	126	66	66	40	28	29	15	101	42	29	37	37	19	15	22	23	13	34	31	14	41	26	39	65	67	73	61	56
chr1	148073872	148074910	23	204	38	351	74	38	660	529	18	8	9	10	43	11	78	162	127	51	237	325	107	156	108	57	65	37	354	120	68	103	81	49	27	29	23	20	59	83	15	103	57	99	156	146	184	151	241
chr1	148074910	148077309	4	26	6	51	11	7	93	48	2	2	2	2	6	2	9	22	18	6	32	39	13	18	13	8	8	6	28	17	10	16	11	7	4	3	3	4	9	11	3	13	7	13	18	18	24	21	20
chr1	148291522	148296359	1	1	1	1	1	1	1	1	1	1	1	1	1	1	2	1	1	1	1	1	1	1	1	1	1	1	2	1	1	1	1	1	1	1	1	1	1	1	1	1	1	1	1	1	1	1	2
chr1	148298639	148308564	1	1	1	1	1	1	1	1	1	1	1	1	1	1	1	1	1	1	1	1	1	1	1	1	1	1	1	1	1	1	1	1	1	1	1	1	1	1	2	1	1	1	1	1	1	1	1
chr1	148318978	148321023	1	1	1	1	1	1	1	1	1	1	1	1	1	2	1	1	1	1	1	1	1	2	2	1	1	1	1	1	1	1	1	1	1	2	1	1	1	1	1	1	1	1	1	1	2	1	1
chr1	148414124	148418822	1	1	1	1	1	1	1	2	1	1	1	1	1	1	1	1	1	1	1	1	1	1	1	1	1	1	2	1	1	1	1	1	1	1	1	1	1	1	1	1	1	1	1	1	1	1	1
chr1	149442596	149444356	1	1	1	1	1	1	1	1	1	1	1	1	1	1	1	1	1	1	1	1	1	1	1	1	1	1	2	1	1	1	1	1	1	1	1	1	1	1	1	1	1	1	1	1	1	1	1
chr1	149594939	149596101	1	1	1	1	1	1	1	2	1	1	1	1	1	1	1	1	1	1	1	1	1	1	1	1	1	1	1	1	1	1	1	1	1	2	1	1	1	1	1	1	1	1	1	1	1	1	1
chr1	150308664	150310492	1	1	1	1	1	1	1	1	0	0	1	1	0	1	1	1	1	1	1	1	1	2	1	1	1	1	1	1	1	1	1	1	1	1	1	1	1	1	1	1	1	1	1	1	0	1	1
chr1	150507421	150508891	1	1	1	1	1	1	1	2	1	1	1	1	1	1	1	1	1	1	1	1	1	1	1	2	1	1	1	1	1	1	1	1	1	1	1	1	1	1	1	1	1	1	1	1	1	1	1
chr1	150625608	150628738	1	1	1	1	1	1	1	1	1	1	1	1	1	1	1	1	1	1	1	1	1	1	1	1	1	1	1	1	1	1	1	1	1	1	1	1	1	1	1	1	1	1	1	1	1	1	1
chr1	151194279	151195351	1	1	1	1	1	1	1	1	1	1	2	1	1	1	1	1	1	1	1	1	1	1	1	1	1	1	2	1	1	1	1	1	1	1	1	1	1	1	1	1	1	1	0	1	1	1	2
chr1	151196351	151201200	1	1	1	1	1	1	1	1	1	1	1	1	1	1	2	1	1	2	2	1	1	2	1	1	1	1	2	1	1	1	1	2	1	1	2	1	1	1	1	1	1	1	2	1	1	1	1
chr1	151361385	151363266	1	1	1	1	1	1	1	1	1	1	1	1	1	1	1	1	1	1	1	1	1	2	1	1	1	0	1	1	1	1	1	1	1	1	1	1	1	1	1	1	1	1	1	1	1	1	1
chr1	157388413	157389499	1	1	1	1	1	1	1	1	1	1	1	1	1	1	1	1	1	1	1	1	2	1	1	1	1	1	1	1	1	1	1	1	1	2	1	1	1	1	1	1	1	1	1	1	2	1	1
chr1	159339837	159341595	1	1	1	1	1	1	1	2	1	1	1	2	1	1	1	1	1	1	1	1	2	1	1	1	1	1	1	1	1	1	1	1	1	2	1	1	1	1	1	1	1	2	1	2	1	1	2
chr1	163641378	163643073	1	1	1	1	1	1	1	1	1	1	1	1	1	1	1	1	1	1	1	1	1	1	1	1	1	0	1	1	1	1	1	1	1	1	1	1	1	1	1	1	1	1	1	1	1	1	1
chr1	163749281	163750392	2	2	2	2	3	2	2	2	2	2	2	2	1	2	2	1	2	2	2	2	2	2	1	2	2	2	2	2	2	2	1	2	2	2	2	2	2	2	2	2	2	2	2	2	2	2	2
chr1	164022972	164026920	1	1	1	1	1	1	1	1	1	1	1	1	1	1	1	1	1	1	1	1	1	2	1	1	1	1	2	1	1	1	1	2	1	1	1	1	1	1	1	1	1	1	1	1	1	1	1
chr1	167072938	167074228	2	2	2	2	2	1	2	2	1	2	1	1	2	1	2	2	2	2	2	2	2	2	2	1	2	2	1	2	2	2	2	2	2	2	1	1	2	2	2	2	1	2	2	1	2	2	2
chr1	167075319	167076319	2	2	2	3	2	2	2	2	2	2	3	2	3	2	3	3	3	2	3	3	2	2	2	3	2	3	2	2	2	2	2	3	2	2	2	2	2	2	3	2	2	2	2	2	2	2	2
chr1	171264014	171265073	13	12	13	21	12	10	13	10	10	13	15	15	10	14	15	16	13	10	17	15	11	15	9	9	9	8	15	8	10	9	10	14	14	8	13	10	9	14	13	11	9	10	10	16	10	9	8
chr1	171265073	171266629	14	20	18	24	17	14	17	14	13	14	23	23	14	23	21	25	17	14	25	22	19	21	12	15	14	15	26	11	13	12	15	18	27	12	18	14	18	20	16	12	13	13	14	21	13	11	16
chr1	171266629	171267629	28	35	35	46	31	22	29	21	20	24	38	37	24	37	38	43	30	22	44	41	30	36	19	25	27	25	43	19	23	23	28	34	45	20	32	25	27	35	31	22	23	20	26	38	22	20	20
chr1	171272081	171273133	26	30	29	45	29	24	27	24	21	25	34	33	22	33	36	37	29	24	41	37	25	32	21	20	20	20	45	18	23	20	25	31	38	18	29	23	23	31	30	22	20	22	22	34	22	20	23
chr1	178266642	178267935	2	2	2	2	2	2	2	2	2	2	2	2	2	2	2	2	2	2	2	2	2	2	2	2	2	2	2	2	2	2	2	2	2	2	2	2	2	2	2	2	2	2	2	2	2	2	2
chr1	179144671	179146509	2	2	2	2	2	2	2	2	2	2	2	2	2	2	2	2	2	2	2	2	2	2	2	2	2	2	2	2	2	2	2	2	2	2	2	2	2	2	2	2	2	2	2	2	2	2	2
chr1	179600204	179602613	2	1	2	1	2	2	2	2	2	2	2	2	2	2	2	2	2	2	2	2	2	2	2	1	2	2	2	2	2	2	2	2	2	2	2	2	2	2	2	2	2	2	2	2	2	2	2
chr1	179602613	179604392	2	2	2	1	2	2	2	2	2	2	2	2	2	2	2	1	2	2	2	1	2	2	2	2	2	2	1	2	2	2	2	2	2	2	2	2	2	2	2	2	2	2	2	2	2	2	2
chr1	179678204	179679204	2	2	2	2	2	2	2	1	2	2	1	2	2	2	2	2	2	2	2	2	2	2	2	2	2	2	1	2	2	2	2	2	2	2	2	2	2	2	2	2	2	2	2	2	2	2	2
chr1	181021304	181023039	1	1	1	1	1	1	1	2	1	1	1	2	1	1	2	1	1	1	2	1	1	2	1	1	1	2	2	1	1	2	1	2	1	1	1	1	1	1	1	1	1	1	1	1	1	2	1
chr1	187966369	187968113	1	1	1	1	1	1	1	1	2	2	1	1	1	1	1	1	1	1	2	1	2	2	1	1	1	1	2	1	1	1	1	1	2	1	1	1	1	1	1	1	1	1	2	1	1	2	2
chr1	193416050	193417348	26	37	28	58	55	33	41	27	31	33	31	54	45	42	38	48	33	28	55	53	26	30	56	37	40	32	43	34	55	50	59	52	44	12	37	31	42	56	46	27	24	26	37	60	35	29	38
chr1	193417348	193418648	6	7	7	9	8	6	7	6	4	5	7	7	6	7	10	13	9	6	12	10	9	9	9	7	7	9	22	6	7	8	8	11	11	7	8	6	8	9	7	8	7	7	8	9	8	7	12
chr1	193915407	193916478	2	3	3	4	3	2	3	3	3	2	3	3	2	3	4	4	3	3	4	3	3	4	3	3	4	3	5	2	3	3	3	4	3	4	2	3	3	3	3	3	3	3	3	3	2	4	2
chr1	194011562	194012701	2	2	2	1	2	2	2	2	2	2	2	2	2	2	1	1	2	1	2	2	2	1	1	1	2	2	1	2	2	1	2	2	2	2	2	2	2	2	2	2	2	2	2	2	2	2	2
chr1	194712619	194714514	2	2	2	2	2	2	2	2	2	2	2	2	2	2	2	2	2	2	2	2	2	2	2	2	2	2	2	2	2	2	2	2	2	2	2	2	2	2	2	2	2	2	2	2	2	2	2
chr1	195098004	195100177	1	1	1	1	1	1	1	2	1	1	1	1	1	1	2	2	1	1	1	2	2	1	1	2	1	2	2	1	2	1	1	1	1	1	1	1	1	1	1	1	1	1	1	1	1	1	1
[truncated: 14 more columns]

## Sheet: S7 Table
Ingenuity pathway analysis: Top biological function and molecules
Diseases and Disorders
Name	p-value	#Molecules
Cancer	1.48E-02 - 3.74E-06	100
Gastrointestinal Disease	1.48E-02 - 3.74E-06	94
Organismal Injury and Abnormalities	1.51E-02 - 3.74E-06	101
Neurological Disease	1.51E-02 - 1.24E-05	31
Connective Tissue Disorders	1.48E-02 - 7.31E-05	17
Molecular and Cellular Functions
Name	p-value	#Molecules
Cell Morphology	1.48E-02 - 9.21E-05	25
Cell-To-Cell Signaling and Interaction	1.48E-02 - 2.07E-04	24
Cellular Assembly and Organization	1.48E-02 - 2.85E-04	27
Cellular Function and Maintenance	1.48E-02 - 3.49E-04	30
Cellular Development	1.48E-02 - 4.56E-04	33
Physiological System Development and Function
Name	p-value	#Molecules
Skeletal and Muscular System Development and Function	1.48E-02 - 5.95E-06	19
Nervous System Development and Function	1.48E-02 - 1.24E-05	33
Connective Tissue Development and Function	1.48E-02 - 4.14E-05	13
Tissue Development	1.48E-02 - 4.14E-05	29
Organ Morphology	1.48E-02 - 7.31E-05	16
Ingenuity pathway analysis:Network
Molecules in Network	Score	Focus Molecules	Top Diseases and Functions
26s Proteasome,ACAT1,ACO2,Actin,Akt,ARHGAP21,Ck2,CYB5B,ENO1,EPS15L1,FAM102B,FMO5,GPC6,HDL-cholesterol,Histone h3,HNRNPA2B1,HOXA10,Insulin,KCNMA1,KIF23,LDL-cholesterol,MPP1,MYT1,NF2,OBSL1,PLEKHG5,PSMC5,PSMD4,RNA polymerase II,SBNO1,SF3A1,TMEM30A,Ubiquitin,UNK,YWHAG	54	25	Cell Morphology, Developmental Disorder, Hereditary Disorder
Ap1 gamma,AP1G1,Calcineurin protein(s),caspase,CD3,CD86,CHP1,EBNA1BP2,F Actin,HERPUD1,Histone h4,HLA-A,Hsp70,Ifn gamma,Igm,IL12 (complex),Immunoglobulin,Interferon alpha,MAP6,Nfat (family),NFkB (complex),NUPL2,PACS1,PGM2L1,PIP5K1C,PLEKHA2,PVALB,S100A9,SMYD3,TBX5,TCR,TNK2,TUBD1,tubulin (family),XRCC6	37	19	Cellular Growth and Proliferation, Hematological System Development and Function, Cell-To-Cell Signaling and Interaction
ADCY,AMPK,ARL8B,ARPC1A,CAPRIN1,CDH2,Cg,COMP,Creb,ERK1/2,FSH,GNAI1,Gsk3,IL1,INHA,Lh,MKNK2,NDUFB8,NR4A3,p70 S6k,p85 (pik3r),Pde,Pdgf (complex),PDGF BB,PHLPP2,PI3K (family),PIK3R2,Pka,Pka catalytic subunit,PLC gamma,PTGS1,RPS6KB1,Secretase gamma,UNC5B,Vegf	27	15	Organismal Injury and Abnormalities, Connective Tissue Disorders, Skeletal and Muscular Disorders
ALB,Alpha 1 antitrypsin,AMPD1,ARIH2,Calcineurin B,CAMTA1,CBR3,Dgk,DMD,F2,Ferritin,GABRD,GNAT1,HIST1H3H,HTT,KCNQ2,MASP2,mGluR,miR-299a-3p (and other miRNAs w/seed AUGUGGG),Mlcp,Mt3,MTSS1,MYT1L,PACSIN1,PEAR1,PPTC7,QTRT2,RLF,SGCZ,SLC1A6,SNTG2,Srebp,STX12,Tmsb4x (includes others),transglutaminase	21	12	Hereditary Disorder, Neurological Disease, Organismal Injury and Abnormalities
ABCB7,ADGRA3,ALDH1L2,ALG9,ALS2,AR,CHADL,COPG1,COPG2,Cytochrome bc1,DENND5A,DNAH17,FAF2,FAS,ITGBL1,KIF3C,MED12L,mir-9,miR-410-5p (and other miRNAs w/seed GGUUGUC),miR-4732-5p (miRNAs w/seed GUAGAGC),MT-ND4L,NARF,NDUFAF1,NR2E1,PPFIA1,RBM6,RCOR1,SLC35F2,SMTN,SPINK1,STK17A,TRIM25,TTC27,TTC23L,ZP3	16	10	Reproductive System Development and Function, Cancer, Organismal Injury and Abnormalities
ARHGDIA,cytokine,ERK,FAK-Src,Flt1,Focal adhesion kinase,GC (complex),hemoglobin,HIF1AN,HOXA1,HOXD3,HOXD10,IkB-NfkB,IL22R1-IL10R2,IL22RA1,Integrin,IRS1/2,Jnk,LDL,Mapk,Mapk kinase,MUC8,P38 MAPK,PI3K (complex),Pkc(s),Rac,Rap1-gp91-p22 phox-p40 phox-p47 phox-p67 phox,RhoGap,RPRD2,Selectin,SRC (family),TNFAIP8L1,TRAF1-TRAF2-TRAF3,TSPAN,XPNPEP2	14	9	Neurological Disease, Embryonic Development, Organismal Development
APC/APC2,Bhlhe41,BICD1,BORA,BTRC,C6orf136,CRELD2,CSNK2B,CSPG5,Dlg,FKBP2,FKBP7,GGNBP2,HIVEP2,MAPK14,miR-3973 (miRNAs w/seed CAAAGUA),miR-6778-3p (miRNAs w/seed GCCUCCC),NXF1,PCCB,PCDH8,PIN1,PPIC,R3HDM4,RAI1,RP11_487E131,SCMH1,SUPT20H,TAF1L,TBC1D32,TNNC2,UBQLN4,UHRF1BP1,WDR12,ZNF142,ZNF383	14	9	Cell Cycle, Connective Tissue Development and Function, Cell Signaling
CARM1,CCDC137,CRAMP1,CRTAC1,DUX4,ECHDC3,ESPNL,FAM207A,FBXO24,FBXO39,JPT2,KCNJ8,LRRC45,miR-17-5p (and other miRNAs w/seed AAAGUGC),miR-34a-5p (and other miRNAs w/seed GGCAGUG),miR-6781-5p (miRNAs w/seed GGGCCGG),miR-939-3p (miRNAs w/seed CCUGGGC),MORN4,MT1E,MT1F,NAPEPLD,PLEKHB1,PRAP1,RASA4B,RNF208,SCT,SEMA4B,SEMA5B,SNU13,SPI1,TAS2R5,TRIM59,TUSC2,WDPCP,ZDHHC1	14	9	Cancer, Cellular Development, Organismal Injury and Abnormalities
GO enrichment
Term	Category	Count	%	PValue	Genes	List Total	Pop Hits	Pop Total	Fold Enrichment	Bonferroni	Benjamini	FDR
GO:0009952~anterior/posterior pattern specification	GOTERM_BP_DIRECT	5	2.38095	0.00727541	ENSGALG00000023420, ENSGALG00000009270, ENSGALG00000000672, ENSGALG00000028128, ENSGALG00000011053	125	56	8994	6.42429	0.992922	0.992922	10.385
GO:0003700~transcription factor activity, sequence-specific DNA binding	GOTERM_MF_DIRECT	11	5.2381	0.00869786	ENSGALG00000011055, ENSGALG00000023420, ENSGALG00000009270, ENSGALG00000004888, ENSGALG00000005932, ENSGALG00000008253, ENSGALG00000018772, ENSGALG00000008250, ENSGALG00000015305, ENSGALG00000011053, ENSGALG00000006234	126	284	8532	2.62274	0.821108	0.821108	10.3471
GO:0045787~positive regulation of cell cycle	GOTERM_BP_DIRECT	3	1.42857	0.00956024	ENSGALG00000013568, ENSGALG00000008250, ENSGALG00000015305	125	11	8994	19.6233	0.998516	0.961478	13.4328
GO:0043565~sequence-specific DNA binding	GOTERM_MF_DIRECT	11	5.2381	0.00976967	ENSGALG00000011055, ENSGALG00000023420, ENSGALG00000003782, ENSGALG00000009270, ENSGALG00000008253, ENSGALG00000008848, ENSGALG00000008250, ENSGALG00000015305, ENSGALG00000026631, ENSGALG00000011053, ENSGALG00000028095	126	289	8532	2.57736	0.855444	0.619795	11.5515
GO:0006355~regulation of transcription, DNA-templated	GOTERM_BP_DIRECT	12	5.71429	0.0130202	ENSGALG00000011055, ENSGALG00000019713, ENSGALG00000003782, ENSGALG00000003392, ENSGALG00000027546, ENSGALG00000018772, ENSGALG00000000672, ENSGALG00000015305, ENSGALG00000026631, ENSGALG00000011053, ENSGALG00000028095, ENSGALG00000005508	125	370	8994	2.33358	0.999862	0.948278	17.8642
GO:0003281~ventricular septum development	GOTERM_BP_DIRECT	3	1.42857	0.0249765	ENSGALG00000006726, ENSGALG00000002140, ENSGALG00000008253	125	18	8994	11.992	1	0.986258	31.6012
GO:0048332~mesoderm morphogenesis	GOTERM_BP_DIRECT	2	0.952381	0.0273854	ENSGALG00000008250, ENSGALG00000005508	125	2	8994	71.952	1	0.976838	34.0952
GO:0001662~behavioral fear response	GOTERM_BP_DIRECT	3	1.42857	0.0363888	ENSGALG00000008415, ENSGALG00000015305, ENSGALG00000005198	125	22	8994	9.81164	1	0.984833	42.685
GO:0072384~organelle transport along microtubule	GOTERM_BP_DIRECT	2	0.952381	0.0407978	ENSGALG00000026973, ENSGALG00000007721	125	3	8994	47.968	1	0.982304	46.4992
GO:0001078~transcriptional repressor activity, RNA polymerase II core promoter proximal region sequence-specific binding	GOTERM_MF_DIRECT	4	1.90476	0.0423196	ENSGALG00000006726, ENSGALG00000008250, ENSGALG00000015305, ENSGALG00000011053	126	53	8532	5.11051	0.9998	0.941545	41.7625
GO:0072091~regulation of stem cell proliferation	GOTERM_BP_DIRECT	2	0.952381	0.0540267	ENSGALG00000026582, ENSGALG00000008073	125	4	8994	35.976	1	0.990969	56.5696
GO:0005515~protein binding	GOTERM_MF_DIRECT	5	2.38095	0.0606284	ENSGALG00000006726, ENSGALG00000008253, ENSGALG00000017358, ENSGALG00000004980, ENSGALG00000015132	126	101	8532	3.35219	0.999996	0.954055	54.2503
GO:0045892~negative regulation of transcription, DNA-templated	GOTERM_BP_DIRECT	6	2.85714	0.0656838	ENSGALG00000011932, ENSGALG00000006726, ENSGALG00000008250, ENSGALG00000000349, ENSGALG00000002377, ENSGALG00000006234	125	157	8994	2.74976	1	0.994013	63.9478
GO:0051683~establishment of Golgi localization	GOTERM_BP_DIRECT	2	0.952381	0.0670746	ENSGALG00000007721, ENSGALG00000005777	125	5	8994	28.7808	1	0.990971	64.7453
GO:0060039~pericardium development	GOTERM_BP_DIRECT	2	0.952381	0.0670746	ENSGALG00000008253, ENSGALG00000005508	125	5	8994	28.7808	1	0.990971	64.7453
GO:0010793~regulation of mRNA export from nucleus	GOTERM_BP_DIRECT	2	0.952381	0.0670746	ENSGALG00000028847, ENSGALG00000005508	125	5	8994	28.7808	1	0.990971	64.7453
GO:0060173~limb development	GOTERM_BP_DIRECT	3	1.42857	0.0715207	ENSGALG00000008253, ENSGALG00000015132, ENSGALG00000003283	125	32	8994	6.7455	1	0.989682	67.1857
GO:2000648~positive regulation of stem cell proliferation	GOTERM_BP_DIRECT	2	0.952381	0.0799439	ENSGALG00000008250, ENSGALG00000015305	125	6	8994	23.984	1	0.990974	71.3826
GO:0045665~negative regulation of neuron differentiation	GOTERM_BP_DIRECT	3	1.42857	0.0835665	ENSGALG00000008848, ENSGALG00000015305, ENSGALG00000011053	125	35	8994	6.16731	1	0.989446	73.0287
GO:0006338~chromatin remodeling	GOTERM_BP_DIRECT	3	1.42857	0.0877108	ENSGALG00000003782, ENSGALG00000006726, ENSGALG00000000672	125	36	8994	5.996	1	0.988271	74.8033
GO:0045944~positive regulation of transcription from RNA polymerase II promoter	GOTERM_BP_DIRECT	10	4.7619	0.0948701	ENSGALG00000003782, ENSGALG00000011932, ENSGALG00000009270, ENSGALG00000004888, ENSGALG00000006726, ENSGALG00000008253, ENSGALG00000028128, ENSGALG00000008848, ENSGALG00000003428, ENSGALG00000011053	125	395	8994	1.82157	1	0.988951	77.6146
KEGG enrichment
Term	Category	Count	%	PValue	Genes	List Total	Pop Hits	Pop Total	Fold Enrichment	Bonferroni	Benjamini	FDR
gga04514:Cell adhesion molecules (CAMs)	KEGG_PATHWAY	6	2.85714	0.0107114	ENSGALG00000024372, ENSGALG00000024348, ENSGALG00000015816, ENSGALG00000014362, ENSGALG00000015132, ENSGALG00000013902	55	109	4353	4.35663	0.568288	0.568288	10.7666
gga00310:Lysine degradation	KEGG_PATHWAY	4	1.90476	0.0188123	ENSGALG00000029138, ENSGALG00000026392, ENSGALG00000017163, ENSGALG00000005508	55	46	4353	6.88221	0.772666	0.523205	18.1996

## Sheet: S8 Table
Breed	Chromosome	Beg	End	LXG1	LXG2	LXG3	LXG4	LXG5	LXG7	LXG8	LXG9	WL1	WL2	WL3	WL4	WL7	WL8	RW1	RW2	RW3	RW4	RW7	RW8	RW9	RW10	SILK1	SILK2	SILK3	SILK4	SILK5	SILK8	SILK9	SILK10	SILK11	XH1	XH2	XH3	XH4	XH5	XH6	XH7	XH8	YOU1	YOU2	YOU3	YOU4	YOU5	YOU7	YOU8
LXD	chr1	43000787	43001844	3	5	5	5	4	4	5	2	3	2	2	3	3	2	2	2	2	2	2	2	2	2	2	3	2	3	2	2	3	2	2	2	2	2	2	2	2	2	3	2	3	2	2	3	2	2
LXD	chr1	43002909	43003953	4	3	5	4	5	4	5	2	2	2	2	2	2	2	2	2	3	2	2	2	2	2	2	2	1	2	2	1	2	2	2	2	2	3	3	2	3	2	2	2	2	2	3	2	2	3
LXD	chr1	43005419	43006551	3	3	4	5	4	3	5	2	2	3	2	2	2	2	2	2	2	2	1	2	2	2	2	2	2	3	2	2	2	2	2	2	2	2	2	2	2	2	2	2	2	2	2	3	2	2
LXD	chr1	43006551	43007551	4	4	6	5	5	4	5	3	3	3	2	3	3	3	2	3	3	2	3	3	2	2	2	2	2	3	3	2	3	2	3	2	3	2	2	3	3	2	3	2	3	2	3	4	2	3
LXD	chr1	43007551	43008551	4	3	5	4	4	4	4	2	2	3	2	2	2	2	2	2	2	2	2	2	2	2	2	3	2	2	2	2	2	2	2	2	2	2	2	2	2	2	2	3	3	2	3	2	2	2
LXD	chr1	43009551	43010585	3	3	4	4	4	3	4	3	2	2	2	2	2	2	2	2	2	2	2	2	2	2	2	2	1	2	2	2	2	2	2	2	1	2	2	2	1	2	2	2	1	2	2	2	2	2
LXD	chr1	43010585	43011585	3	4	4	4	4	3	4	2	2	2	2	2	2	2	2	2	2	2	2	1	2	2	2	3	2	2	2	2	2	2	2	2	2	2	2	2	2	2	2	2	2	2	2	1	2	2
LXD	chr1	43011585	43012618	2	3	4	4	4	4	4	2	2	2	2	2	3	2	2	2	2	2	1	2	2	1	2	2	2	2	2	2	2	2	2	2	2	2	2	1	2	2	2	2	2	2	2	2	3	2
LXD	chr1	43012618	43013712	3	3	4	4	5	4	5	2	2	2	3	2	2	2	2	2	2	2	2	2	3	2	2	1	2	2	2	2	2	2	2	2	2	2	2	2	2	2	1	2	2	2	2	2	3	2
LXD	chr1	43014843	43015843	3	4	4	5	5	3	4	2	3	2	2	2	3	2	2	2	2	2	2	2	2	2	2	2	2	3	2	2	3	2	2	2	2	2	2	3	2	2	2	2	2	2	2	2	2	2
LXD	chr1	43015843	43016843	4	4	4	4	4	4	4	2	2	2	2	2	2	2	2	2	2	2	2	2	1	2	2	1	2	2	2	2	2	2	2	2	2	3	2	2	2	2	2	3	2	3	2	2	2	2
LXD	chr1	43017843	43018931	3	3	3	3	3	3	3	1	2	2	2	2	1	1	2	2	2	2	1	1	1	1	2	2	1	2	2	2	1	2	1	2	1	2	2	1	2	2	1	2	1	2	2	2	2	2
LXD	chr1	43022216	43023700	3	3	4	3	3	4	3	2	2	2	2	3	2	2	2	2	2	2	2	2	2	2	2	2	2	2	2	2	2	2	2	2	2	2	2	3	2	1	2	2	2	2	2	2	2	2
LXD	chr1	43023700	43024920	3	3	3	3	3	3	3	2	2	2	2	2	2	2	2	2	2	2	2	2	2	2	2	1	2	2	2	2	2	2	2	2	2	2	2	1	2	2	2	2	2	2	2	2	2	1
LXD	chr1	43024920	43025976	3	3	3	3	3	4	3	2	2	2	2	2	2	1	2	2	2	2	2	2	2	2	2	2	2	3	2	2	2	1	2	2	2	2	1	2	2	2	2	1	2	2	2	2	2	2
LXD	chr1	43029417	43030417	3	3	3	3	3	4	4	3	2	2	2	3	3	2	2	2	2	2	2	2	2	2	2	3	2	2	2	2	2	2	3	2	2	2	2	2	3	2	2	3	2	2	3	2	2	2
LXD	chr1	43030417	43031589	3	3	3	2	3	3	3	2	2	2	2	2	2	1	2	2	2	2	2	2	2	2	2	2	2	2	2	2	1	1	2	2	2	2	2	2	2	2	2	2	2	2	2	2	2	2
LXD	chr1	43031589	43032642	3	3	3	4	3	4	3	2	2	2	2	2	1	2	1	2	2	2	2	2	2	2	2	2	2	2	2	2	2	2	2	2	2	2	1	2	2	2	2	1	2	2	2	2	2	2
LXD	chr1	43035682	43036813	3	3	3	3	2	3	3	2	2	2	2	2	1	2	2	2	2	1	2	2	2	1	2	2	2	1	3	2	1	2	2	2	2	2	2	2	1	2	2	2	2	2	2	2	2	2
LXD	chr1	43036813	43037813	3	3	3	3	3	3	3	2	2	3	2	2	2	2	2	3	2	2	2	2	2	2	2	2	2	1	2	2	2	2	1	2	2	2	2	2	2	2	2	2	2	2	3	2	2	2
LXD	chr1	43038853	43039853	3	3	3	3	2	3	3	2	2	2	2	2	2	2	2	2	2	1	2	2	1	2	2	1	2	2	3	2	2	2	2	2	2	2	2	2	2	2	2	2	2	2	2	2	2	2
LXD	chr1	43039853	43040924	3	3	3	3	3	3	3	3	2	2	2	2	1	2	2	2	1	2	2	2	2	2	2	2	2	1	2	2	2	2	2	2	2	2	2	2	2	2	2	2	1	2	2	1	2	2
LXD	chr1	43041924	43044659	3	3	3	3	3	3	3	3	2	2	2	2	1	2	2	2	2	1	2	2	2	2	2	2	2	2	3	1	2	1	2	2	2	2	2	2	1	2	2	2	2	2	2	2	1	2
LXD	chr1	43046235	43047235	3	3	3	4	4	4	3	3	2	3	2	2	2	2	2	2	2	2	3	2	2	2	2	3	2	2	2	2	2	2	2	2	2	2	2	2	2	2	2	3	2	2	2	2	2	2
LXD	chr1	43050995	43051995	4	4	3	4	3	4	3	2	3	2	2	2	2	2	3	2	2	2	2	2	2	3	2	2	2	3	2	2	2	2	2	2	2	2	3	2	2	3	2	2	2	2	2	2	2	2
LXD	chr1	43054400	43055400	3	3	3	4	3	3	4	3	2	3	2	2	2	2	2	2	2	2	2	2	2	3	2	2	2	3	3	2	2	2	2	3	2	2	2	2	3	3	2	2	2	3	2	2	3	2
LXD	chr1	43056400	43057400	3	4	3	4	4	3	3	2	2	2	2	2	2	3	2	2	2	2	2	2	2	2	2	2	2	1	2	2	2	2	2	2	2	2	2	2	2	2	2	2	3	2	2	2	2	2
LXD	chr1	43057400	43058400	3	3	4	2	4	3	3	3	2	2	2	2	2	2	2	2	2	2	2	2	2	2	2	2	2	2	2	2	2	2	2	2	2	2	2	2	2	3	2	3	2	2	2	2	2	2
LXD	chr1	43058400	43059400	4	3	3	3	4	4	3	2	2	2	2	2	3	2	2	2	2	2	2	2	2	2	2	2	2	2	2	2	2	3	2	2	2	2	2	2	2	2	2	2	2	3	2	2	2	2
LXD	chr1	43059400	43060654	2	2	2	1	2	1	1	2	1	1	1	1	1	1	1	1	1	1	1	1	1	1	1	1	1	1	1	1	1	1	1	1	1	1	1	1	1	1	1	1	1	1	0	1	1	1
LXD	chr1	43060654	43061654	3	3	3	4	3	3	3	2	2	2	2	2	2	3	2	2	2	2	2	2	2	2	3	2	2	2	2	2	2	2	2	2	2	2	3	2	2	2	1	2	2	2	2	2	2	2
LXD	chr1	43064688	43065688	3	4	4	3	4	4	3	2	2	2	2	3	2	2	2	3	2	2	2	2	2	2	2	2	2	2	2	2	2	3	3	2	2	2	2	2	2	1	2	2	2	2	2	2	3	2
LXD	chr1	43065688	43066688	3	3	3	2	3	3	2	2	2	2	2	2	2	2	2	2	2	2	2	2	2	2	2	1	1	1	2	2	2	1	2	2	2	2	2	2	2	1	2	2	2	2	2	2	1	2
LXD	chr1	43066688	43067688	3	4	3	3	3	4	4	2	2	3	2	2	2	2	3	2	2	2	3	2	2	2	2	2	2	2	2	2	2	2	2	2	2	2	2	3	2	1	3	2	2	2	2	2	2	2
LXD	chr1	44754015	44755015	4	4	4	4	2	4	3	5	2	2	2	2	2	2	2	2	2	2	2	2	2	2	1	2	2	2	3	1	2	1	1	2	2	2	2	2	2	2	2	2	2	2	2	2	2	3
LXD	chr1	44755015	44756170	3	4	3	4	2	3	3	5	2	2	2	2	2	2	2	2	1	1	1	2	2	2	2	2	2	2	1	1	2	2	2	1	1	2	2	2	2	1	1	2	2	2	2	1	2	2
LXD	chr1	44756170	44757170	5	6	4	5	3	3	3	7	2	3	2	2	2	2	2	2	2	2	1	2	2	2	2	3	2	3	1	3	2	2	2	1	2	2	2	2	2	2	2	2	2	2	2	2	2	2
LXD	chr1	44757170	44758264	3	4	3	3	2	2	2	5	1	2	1	1	1	1	2	1	1	2	2	1	2	1	1	2	1	1	1	2	2	1	2	1	1	1	2	1	1	1	2	1	2	1	2	1	1	2
LXD	chr1	44758264	44759264	4	5	4	5	3	3	2	6	2	3	2	3	2	2	2	3	2	2	2	2	2	2	2	2	2	3	2	2	2	2	2	3	2	2	2	2	3	2	2	2	2	2	2	3	2	2
LXD	chr1	44759264	44760264	3	5	3	3	3	3	2	5	2	2	2	2	2	2	2	2	2	2	2	2	2	2	3	2	2	2	2	2	2	2	2	2	2	2	2	2	2	2	2	2	2	2	2	2	2	2
LXD	chr1	44760264	44761264	4	5	4	4	3	3	2	7	2	2	2	2	2	2	2	2	2	2	2	1	2	2	2	2	2	2	1	2	2	2	2	2	2	2	2	1	2	2	2	2	2	2	2	1	2	2
LXD	chr1	44761745	44762745	3	4	3	3	2	3	2	4	2	2	2	1	2	2	1	1	1	2	2	1	2	2	2	2	2	2	1	2	2	2	2	1	1	2	2	2	2	2	1	2	2	2	2	2	2	2
LXD	chr1	44764152	44765194	3	5	4	3	3	3	3	6	2	2	2	2	2	2	2	2	2	2	2	2	2	2	1	1	1	2	2	2	2	1	2	1	2	2	2	2	2	2	2	2	2	2	2	2	2	2
LXD	chr1	44765194	44766194	4	5	4	5	3	3	3	7	2	2	2	2	2	2	1	2	2	2	2	2	2	3	2	2	2	2	2	2	2	2	1	2	2	2	2	2	2	2	2	2	2	2	2	2	2	2
LXD	chr1	44766194	44767194	4	5	5	5	3	3	4	6	2	2	2	3	2	2	2	2	2	2	2	2	3	2	2	2	2	2	2	2	2	2	2	2	3	2	3	3	2	3	2	2	2	2	2	2	2	2
LXD	chr1	44767194	44768194	4	4	3	4	2	3	2	5	2	2	2	2	2	2	1	2	2	2	2	2	2	2	2	2	2	2	1	3	2	2	2	2	2	2	1	3	2	2	2	2	2	2	2	2	2	2
LXD	chr1	44768194	44769228	4	5	3	4	2	2	2	6	1	1	1	2	1	1	2	1	1	2	2	1	2	2	1	2	1	2	1	2	1	2	1	1	1	1	1	2	1	1	1	2	1	1	1	2	1	1
LXD	chr1	44770228	44771228	4	6	3	5	3	3	2	7	1	2	2	2	2	2	2	2	2	2	2	2	2	2	2	2	2	2	2	2	2	2	2	1	2	2	2	2	2	2	1	2	1	2	2	2	2	2
LXD	chr1	44771228	44772228	4	6	4	5	2	3	3	7	1	2	2	1	2	1	2	1	1	2	1	2	2	2	2	2	1	1	2	2	2	2	1	2	2	2	2	2	2	2	2	1	1	1	1	2	2	2
LXD	chr1	44772228	44773228	4	4	3	4	2	3	2	6	2	2	2	1	2	2	2	2	2	2	2	2	2	2	1	2	2	2	2	3	2	2	2	1	2	2	2	1	2	2	2	2	1	1	2	2	3	2
LXD	chr1	44773228	44774317	4	6	4	5	3	3	3	6	2	2	2	2	2	2	2	2	2	2	2	2	2	2	2	2	2	2	2	2	1	2	2	2	2	2	2	2	2	2	2	2	2	2	2	1	2	2
LXD	chr1	44830371	44831371	2	3	3	4	3	4	3	3	2	2	2	2	1	2	2	2	2	3	2	2	2	2	2	2	2	2	2	2	2	3	2	2	2	2	2	2	2	2	2	1	2	2	2	2	1	3
LXD	chr1	65372594	65373660	6	6	6	6	5	4	5	5	2	3	3	3	3	3	3	3	2	2	3	2	3	2	2	2	2	2	4	2	3	3	2	3	3	3	4	2	3	3	2	3	3	3	3	3	3	3
LXD	chr1	65375940	65376940	8	7	8	7	6	6	5	6	2	2	2	3	3	3	3	2	3	3	3	3	2	3	3	3	2	2	3	2	2	2	2	2	3	3	3	2	2	3	3	2	3	2	2	3	3	2
LXD	chr1	65637362	65638362	7	8	9	9	7	6	5	5	3	3	3	3	3	3	4	3	2	3	3	3	3	3	2	3	4	3	3	3	3	3	3	3	4	4	4	3	3	3	3	3	3	3	3	4	4	3
LXD	chr1	65638362	65639362	36	31	45	44	33	22	25	32	7	9	11	12	8	11	15	11	10	7	14	11	8	9	8	9	8	9	18	6	8	7	9	16	18	12	12	7	8	11	11	9	10	8	9	12	9	8
LXD	chr1	65638362	65639362	36	31	45	44	33	22	25	32	7	9	11	12	8	11	15	11	10	7	14	11	8	9	8	9	8	9	18	6	8	7	9	16	18	12	12	7	8	11	11	9	10	8	9	12	9	8
LXD	chr1	65639362	65640647	17	16	20	19	15	11	13	12	6	7	8	8	6	9	10	8	6	6	10	8	5	5	5	8	6	7	10	5	6	6	6	10	11	7	8	5	6	7	6	6	7	5	6	9	7	6
LXD	chr1	65639362	65640647	17	16	20	19	15	11	13	12	6	7	8	8	6	9	10	8	6	6	10	8	5	5	5	8	6	7	10	5	6	6	6	10	11	7	8	5	6	7	6	6	7	5	6	9	7	6
LXD	chr1	65640647	65641686	14	12	15	15	12	8	10	10	4	6	5	5	4	7	7	6	5	4	6	6	4	4	3	5	4	5	8	4	4	4	4	6	7	5	6	4	4	5	5	5	5	3	5	6	5	4
LXD	chr13	1196194	1197194	10	18	11	10	12	14	13	14	5	4	6	8	4	6	9	11	7	9	9	10	4	11	7	5	8	8	4	10	7	7	6	4	12	4	6	5	9	6	4	10	6	5	6	5	6	6
LXD	chr13	1197194	1198194	10	17	10	8	11	14	13	12	5	3	3	5	4	4	6	7	5	7	6	7	4	10	6	4	6	5	2	7	6	5	4	3	8	3	5	5	7	3	5	7	4	5	5	4	6	5
LXD	chr13	1198194	1199375	5	8	5	5	6	7	8	8	4	2	3	4	3	2	4	4	3	4	4	5	1	6	2	1	4	3	2	4	3	3	3	2	4	2	4	3	3	2	2	4	4	4	2	4	3	3
LXD	chr13	1199375	1200375	9	13	8	7	8	10	9	11	4	3	3	5	3	2	5	5	4	6	6	7	4	9	4	3	4	5	3	7	5	3	5	3	7	3	4	5	5	4	4	6	4	4	3	5	4	5
LXD	chr13	1200375	1201375	9	14	8	8	9	12	13	10	5	3	5	5	4	4	8	7	5	5	7	9	4	10	5	3	5	4	3	9	6	4	4	5	9	4	4	6	6	5	5	7	5	5	6	5	4	6
LXD	chr13	1201375	1202375	7	10	7	6	8	9	10	9	3	3	3	4	3	3	4	5	4	4	6	6	4	8	4	3	4	4	2	6	5	3	3	3	7	3	3	4	4	2	4	6	4	3	4	3	4	4
LXD	chr15	2632758	2633758	2	2	2	2	2	2	2	2	3	2	3	3	3	3	3	3	3	3	3	4	3	2	3	3	3	3	3	3	3	2	3	4	3	2	2	3	3	3	3	3	2	3	2	3	3	3
LXD	chr25	976412	978081	0	0	1	1	1	1	1	0	3	1	2	2	2	2	2	1	2	2	2	2	2	2	1	2	2	2	1	2	2	1	2	1	1	1	2	2	2	3	2	2	1	3	2	2	1	2
LXD	chr4	47088311	47089311	1	1	2	0	1	0	0	2	2	2	2	2	2	2	2	2	2	2	2	2	2	2	2	2	2	3	2	2	1	3	2	2	2	2	2	2	2	2	2	2	3	2	2	2	2	2
LXD	chr4	80834764	80835764	3	3	3	3	3	3	3	3	2	2	2	2	2	2	2	1	1	2	2	2	2	2	3	2	2	2	1	2	2	2	2	1	2	2	2	2	1	1	1	2	2	2	2	3	2	2
LXD	chr4	80835764	80837018	4	3	3	4	3	3	3	3	2	2	2	2	2	2	2	1	2	2	2	2	2	2	3	2	3	2	1	1	2	2	2	1	2	2	2	1	2	2	2	2	3	2	2	2	2	2
LXD	chr4	80837018	80838092	5	5	3	4	3	3	3	3	2	2	2	2	3	2	2	2	2	2	2	2	2	2	4	2	3	2	2	2	2	2	2	2	2	2	2	2	2	2	2	2	2	2	2	2	2	3
LXD	chr4	80838092	80839092	4	5	3	4	3	3	2	4	2	2	2	2	2	2	2	2	2	2	2	1	2	2	3	2	3	2	1	2	1	2	2	2	2	2	2	2	2	1	2	2	2	2	2	3	2	2
LXD	chr4	80839092	80840135	4	5	4	4	3	4	3	3	2	3	2	2	2	2	2	2	2	2	2	1	2	2	4	2	3	2	2	2	2	1	2	2	2	2	2	2	2	2	2	3	2	2	2	2	2	2
LXD	chr4	80840135	80841488	2	2	2	2	2	1	2	2	1	1	1	1	1	1	1	1	1	1	1	1	2	1	1	1	1	1	2	1	1	1	1	1	1	1	1	1	1	1	1	1	1	1	1	0	1	1
LXD	chr4	80841488	80842488	5	6	4	5	4	4	5	4	3	4	2	3	2	2	2	2	2	2	3	2	2	3	4	3	3	2	3	2	2	2	2	3	2	2	3	2	2	2	2	3	3	2	2	2	2	2
LXD	chr4	80844400	80845469	5	4	4	5	4	4	3	3	2	3	2	2	3	2	2	2	2	2	2	2	2	3	4	2	3	2	2	2	3	2	2	2	2	2	2	2	2	1	2	2	2	2	2	2	2	2
LXD	chr4	80845469	80846469	5	5	4	5	4	4	4	4	2	3	2	2	3	3	2	2	2	2	2	2	2	2	5	3	4	3	2	3	2	2	2	2	2	2	2	2	2	2	3	2	3	2	2	2	3	2
LXD	chr4	80847546	80848601	4	5	3	4	3	3	2	3	2	2	2	2	2	2	1	2	1	1	2	2	2	2	3	2	3	2	2	2	2	2	2	1	2	2	2	2	2	2	2	2	2	2	2	2	2	2
LXD	chr4	80848601	80850024	4	4	3	4	3	3	3	3	2	2	2	2	2	2	2	2	2	2	1	2	2	2	3	2	2	2	2	2	2	2	2	2	2	2	2	2	1	2	2	2	2	2	2	2	2	2
LXD	chr4	80850024	80851024	5	5	4	5	4	5	5	4	3	3	3	3	3	3	3	2	2	3	3	2	2	2	6	3	4	2	3	2	3	2	2	3	2	2	3	2	2	2	2	3	2	3	3	3	3	3
LXD	chr7	20580756	20581756	3	3	2	4	3	3	2	3	2	2	2	2	2	2	2	2	2	2	2	1	2	2	1	1	1	2	2	2	1	2	1	2	2	2	2	2	2	2	2	2	2	2	2	2	2	2
SILK	chr1	6114545	6115545	2	2	2	2	2	2	2	2	2	2	3	2	2	2	2	3	2	3	2	2	2	2	3	4	3	3	2	3	3	3	3	2	3	2	2	3	2	2	2	3	2	2	2	2	3	2
SILK	chr1	113125666	113126699	7	7	12	9	10	9	9	8	12	8	12	10	12	13	7	9	11	8	12	7	12	11	5	5	6	4	6	6	7	7	8	6	9	7	12	8	11	10	7	7	9	10	9	10	13	12
SILK	chr1	145949097	145950097	2	2	2	2	2	2	2	2	2	2	2	3	2	2	2	2	2	2	2	2	2	2	2	1	1	0	1	1	0	1	1	2	2	2	2	2	2	2	2	2	2	3	2	2	2	2
SILK	chr1	145950097	145951097	2	3	2	2	2	2	2	3	2	3	2	2	3	2	2	2	2	2	2	2	2	2	2	1	1	0	1	1	0	1	1	2	2	2	2	2	2	2	2	2	2	2	1	2	2	2
SILK	chr1	175891057	175892057	2	2	2	3	3	2	2	2	2	2	2	3	2	2	2	2	3	3	2	2	2	2	3	3	3	3	2	3	3	3	3	2	2	2	3	2	3	2	2	2	2	2	2	2	3	2
SILK	chr10	7128136	7129232	1	1	1	1	1	2	1	2	1	1	1	1	1	1	1	1	1	1	1	2	2	2	2	2	3	2	2	2	2	2	2	2	1	0	1	1	2	2	1	1	1	1	1	1	1	1
SILK	chr10	7201386	7202665	2	3	2	2	2	2	2	2	2	2	2	2	2	2	2	2	2	2	2	3	2	2	3	3	3	3	3	3	2	3	2	3	2	2	2	2	2	2	2	2	1	2	2	2	2	2
SILK	chr12	3553713	3554713	2	2	2	1	2	2	2	2	2	2	2	2	2	2	2	2	2	3	2	2	2	2	3	3	3	3	2	3	3	3	2	2	2	2	2	2	2	2	2	2	2	2	2	2	3	2
SILK	chr2	22707246	22708866	2	2	2	2	2	2	2	2	2	2	2	2	3	2	2	2	2	3	2	3	2	2	3	3	3	2	3	3	3	3	3	2	2	2	2	2	2	2	2	2	2	2	2	2	3	2
SILK	chr2	146780776	146782250	2	2	2	2	2	3	2	2	3	2	2	2	2	2	2	2	2	2	2	2	2	2	1	0	1	0	3	1	1	0	1	2	2	2	2	2	2	2	2	2	2	2	2	2	2	2
SILK	chr2	146782250	146783250	3	3	2	3	4	2	3	2	3	3	3	3	2	3	3	2	3	2	3	2	3	2	1	0	1	0	3	1	1	0	1	2	3	3	3	3	3	3	2	2	3	3	3	3	3	3
SILK	chr20	11111563	11112563	2	3	2	3	2	2	2	2	2	2	2	3	2	2	3	3	3	3	3	3	3	2	5	5	5	5	4	4	5	5	5	3	2	2	2	2	2	3	3	2	2	2	2	2	2	2
SILK	chr20	11112563	11113563	3	2	3	3	2	3	2	2	2	2	2	2	2	2	3	3	3	3	2	3	3	2	4	4	5	5	4	5	5	4	5	2	3	2	2	2	2	2	3	2	2	2	2	3	2	2
SILK	chr20	11113563	11114563	2	2	2	3	2	2	3	2	2	3	2	2	2	2	2	3	2	3	2	2	3	2	5	5	5	5	4	5	5	5	5	3	3	2	2	2	3	3	3	2	2	2	2	2	2	2
SILK	chr20	11114563	11115563	3	3	2	2	2	2	2	2	2	3	2	2	2	3	3	3	2	3	2	3	2	2	5	4	5	5	4	5	6	4	4	2	3	2	2	3	3	3	2	2	3	2	2	1	3	2
SILK	chr20	11115563	11116638	2	2	1	1	2	1	2	2	2	2	1	1	2	2	2	2	2	2	2	2	2	2	4	3	3	4	3	3	3	3	3	2	2	2	2	2	2	2	2	2	2	1	1	2	2	2
SILK	chr20	11116638	11117638	2	2	3	2	2	2	2	2	2	2	2	3	2	3	3	2	3	3	2	3	2	2	6	5	5	5	6	5	4	5	5	3	3	2	2	3	2	3	3	2	2	2	2	2	3	3
SILK	chr20	11117638	11118638	2	2	2	2	2	2	2	2	2	2	2	2	2	2	2	2	2	2	2	3	2	2	4	5	4	4	4	5	5	4	4	2	2	2	2	2	2	2	2	2	2	2	1	2	2	2
SILK	chr20	11118638	11119701	2	2	2	2	2	3	2	2	2	2	2	2	2	2	2	2	2	2	3	2	2	2	6	4	5	5	4	5	4	4	5	3	3	2	2	2	3	2	2	2	2	2	2	2	2	2
SILK	chr20	11119701	11121386	2	2	2	2	2	2	2	2	2	2	2	2	2	2	3	3	2	3	3	3	2	2	5	5	4	4	5	4	3	4	4	2	2	2	2	2	2	3	3	1	2	3	2	2	2	3
SILK	chr20	11121386	11122686	2	2	2	2	2	2	2	2	1	2	1	2	2	2	2	2	2	2	2	2	3	2	4	3	3	3	4	4	4	3	3	3	2	2	2	2	2	2	2	1	2	1	1	2	2	2
SILK	chr20	11122686	11123686	3	2	2	2	2	3	2	3	2	2	2	2	2	3	3	2	2	3	3	3	2	2	6	4	5	5	5	4	5	5	5	3	3	2	3	2	3	3	2	2	2	2	2	2	3	3
SILK	chr20	11123686	11124686	2	2	2	2	3	3	3	2	3	2	2	2	2	2	3	3	2	3	2	3	2	3	5	4	5	4	5	5	5	4	5	3	3	2	3	3	3	3	2	2	2	2	2	2	2	3
SILK	chr20	11124686	11126286	2	2	2	2	2	2	2	2	2	2	1	2	2	2	2	2	2	2	1	1	2	2	3	3	4	3	3	3	4	3	3	1	1	1	2	2	2	1	2	2	2	1	2	2	2	2
SILK	chr20	11126286	11127286	2	3	3	2	2	3	2	2	2	2	2	3	2	2	2	3	3	2	2	2	3	2	5	5	5	4	5	4	4	4	5	2	3	2	3	3	2	2	3	2	2	2	2	2	2	2
SILK	chr20	11127286	11128286	1	2	2	2	2	2	1	2	2	2	2	2	2	1	2	2	2	2	2	2	2	2	4	4	4	4	3	4	4	4	4	2	2	2	2	2	2	2	2	2	2	2	1	3	2	2
SILK	chr20	11128286	11129286	3	2	2	3	3	2	2	3	3	2	2	3	3	2	3	2	3	3	3	3	2	2	5	5	5	5	5	5	4	5	6	3	3	3	2	3	3	3	3	3	2	3	2	2	2	2
SILK	chr20	11129286	11130323	2	2	2	2	2	2	2	2	2	2	1	2	1	2	2	3	2	2	2	2	3	2	5	4	4	4	4	4	4	4	4	2	2	2	2	2	2	2	2	2	2	2	1	2	2	2
SILK	chr20	11130323	11131323	2	2	1	2	2	2	2	2	2	2	2	2	2	3	2	2	3	3	2	2	2	2	4	5	4	4	4	4	4	4	4	3	2	2	2	2	2	2	2	2	2	2	2	2	2	2
SILK	chr20	11131323	11132323	1	1	2	2	2	3	1	2	2	2	3	2	2	1	2	2	3	2	2	3	2	2	5	4	4	4	4	4	4	4	4	3	2	2	2	2	2	3	3	2	2	3	2	2	2	2
SILK	chr20	11132323	11133323	2	2	2	2	2	2	2	3	2	2	3	2	2	2	2	2	3	3	2	2	3	2	4	4	4	5	4	5	4	5	5	2	2	2	2	3	2	2	3	2	2	2	1	2	2	2
SILK	chr20	11133323	11134323	3	2	2	3	2	2	2	2	3	2	2	2	2	2	2	2	3	2	3	2	2	2	4	5	4	4	4	4	4	4	4	2	2	3	2	2	3	1	2	2	2	2	2	2	2	3
SILK	chr20	11134323	11135823	2	2	1	2	2	2	2	2	2	2	2	2	2	2	2	3	2	2	2	3	2	2	5	5	4	5	4	5	5	4	6	2	2	2	2	3	2	2	3	2	2	2	2	1	2	3
SILK	chr20	11135823	11136823	3	3	2	2	3	2	2	2	2	2	3	2	3	3	3	2	2	3	3	3	2	2	5	5	4	4	4	6	5	6	4	3	3	2	2	2	2	3	2	3	3	2	2	2	2	2
SILK	chr20	11136823	11137823	2	2	3	2	3	3	2	2	2	3	3	3	3	2	3	2	3	3	2	3	2	2	5	5	6	5	5	5	6	6	5	2	2	2	2	3	3	3	3	2	3	2	2	3	3	3
SILK	chr20	11137823	11138823	2	2	2	2	2	3	2	2	2	2	3	3	2	2	4	2	3	3	3	3	3	2	5	5	5	6	4	5	5	5	5	3	2	2	2	3	2	3	3	2	2	3	3	2	2	3
SILK	chr20	11138823	11139823	2	2	2	2	2	2	2	2	3	2	2	2	3	2	3	2	2	2	3	3	3	2	5	5	5	5	5	6	4	5	4	3	3	2	2	3	3	2	2	2	2	3	3	2	2	3
SILK	chr20	11139823	11140867	2	2	2	2	2	2	2	2	2	2	2	2	2	1	2	2	2	2	2	2	2	2	3	4	4	4	4	3	4	3	3	2	2	2	1	2	2	2	2	2	2	2	2	2	2	1
SILK	chr20	11140867	11141867	2	2	2	2	2	2	3	3	2	2	2	3	3	2	2	2	2	2	2	3	2	2	4	5	5	4	3	5	5	4	4	3	2	3	3	3	2	3	2	2	3	2	3	2	2	2
SILK	chr20	11141867	11142867	2	2	2	3	2	2	2	2	2	2	2	3	3	3	3	3	2	2	2	3	2	2	4	5	4	4	5	6	5	5	5	3	2	2	2	2	2	2	3	2	2	2	3	4	2	2
SILK	chr20	11142867	11143867	3	2	3	2	2	2	2	2	2	2	2	2	2	2	2	2	2	3	2	2	3	2	5	4	3	4	4	5	4	5	4	2	2	2	2	2	2	2	2	2	2	2	2	2	2	2
SILK	chr20	11143867	11144913	1	2	2	2	2	1	1	2	1	2	1	1	2	1	2	2	2	3	2	2	2	2	3	5	4	4	3	3	4	4	5	2	2	2	2	2	2	2	2	1	1	2	2	2	2	2
SILK	chr20	11144913	11145950	2	2	2	2	2	3	2	2	2	2	2	2	1	1	2	2	2	3	3	3	2	2	4	5	5	4	4	4	4	5	5	2	2	2	2	2	2	2	2	2	1	2	2	2	2	2
SILK	chr20	11145950	11146985	2	2	1	1	2	2	2	2	2	2	2	2	2	2	2	1	2	1	2	2	2	1	3	3	4	3	2	3	3	4	3	1	1	2	2	2	2	1	2	2	1	1	2	1	1	2
SILK	chr20	11146985	11148564	2	2	1	2	2	2	1	2	2	2	2	2	2	2	2	2	2	3	2	2	2	2	4	3	4	4	4	4	4	3	5	2	2	2	2	2	2	2	2	2	2	2	2	2	2	2
SILK	chr20	11148564	11149564	2	2	3	2	2	2	2	3	2	2	2	2	2	2	3	2	2	2	3	2	3	2	5	4	5	4	5	5	4	5	5	2	2	2	2	3	2	2	2	3	3	3	2	2	2	2
SILK	chr20	11149564	11150564	3	2	2	2	3	2	2	2	2	2	2	2	3	2	2	3	2	3	2	2	2	3	5	5	5	5	4	5	5	5	4	3	3	2	2	3	3	2	2	3	2	2	3	3	3	2
SILK	chr20	11150564	11151564	2	3	2	2	2	2	3	2	2	2	2	2	2	3	3	3	2	2	3	3	2	2	4	5	5	4	4	5	5	5	5	3	3	2	2	2	2	2	2	2	2	2	2	2	2	2
SILK	chr20	11151564	11152564	2	2	2	2	2	2	2	3	2	3	3	2	3	3	2	3	2	3	3	3	2	2	5	5	4	4	4	4	5	5	5	2	3	2	2	2	3	2	3	2	3	2	2	2	2	2
SILK	chr20	11152564	11153564	2	2	2	2	2	1	2	2	2	2	2	2	2	2	2	2	2	2	2	2	3	2	5	4	6	4	4	6	4	5	5	3	2	2	2	2	2	2	2	2	2	2	3	2	1	2
SILK	chr20	11153564	11154564	2	2	2	2	2	2	3	2	2	2	2	2	2	2	2	2	2	3	2	2	2	2	5	4	4	3	4	5	4	5	4	3	3	2	2	2	2	2	3	3	2	2	2	2	2	2
SILK	chr20	11154564	11155624	2	2	2	2	2	2	2	2	3	2	3	2	2	2	3	3	3	3	4	2	2	2	5	4	5	4	3	4	5	4	4	2	3	2	2	2	2	2	2	3	2	2	2	2	2	2
SILK	chr20	11155624	11156624	2	2	3	2	2	3	3	2	2	3	2	2	3	3	3	3	2	3	3	3	2	2	5	6	5	6	5	4	5	6	5	3	3	2	3	3	3	3	3	3	4	3	3	3	3	3
SILK	chr20	11156624	11157959	2	2	2	2	2	2	2	2	1	2	2	1	2	2	2	2	3	2	3	2	2	2	4	4	4	3	4	4	3	4	3	2	2	2	2	2	2	2	2	1	1	2	2	3	2	1
SILK	chr20	11157959	11159062	1	2	1	2	3	2	2	2	2	2	2	2	1	2	3	3	3	3	2	2	2	2	5	5	4	4	5	4	5	4	5	2	2	3	2	3	2	3	2	2	2	2	2	2	2	2
SILK	chr20	11160116	11161116	2	2	2	2	2	2	2	2	2	2	2	2	2	2	2	2	2	2	2	1	2	2	3	3	3	3	4	3	3	3	3	2	2	2	2	2	2	2	2	2	2	2	2	2	2	2
SILK	chr20	11161116	11162116	2	2	2	2	1	2	2	2	2	2	2	2	2	2	2	2	2	3	2	2	2	2	5	4	4	4	5	4	5	4	4	2	2	2	3	2	2	3	2	2	2	2	2	2	2	2
SILK	chr20	11162116	11163116	2	3	2	2	2	2	2	2	2	2	2	2	2	2	2	2	3	2	2	2	2	3	4	4	4	4	4	4	4	5	4	2	2	2	2	3	2	2	2	2	2	2	2	1	2	2
SILK	chr20	11163116	11164116	2	3	2	2	3	2	3	2	2	2	2	2	2	2	2	2	3	2	3	2	2	2	5	5	5	4	4	5	5	5	5	3	3	3	2	2	2	2	3	3	2	3	1	2	2	2
SILK	chr20	11164116	11165116	3	2	2	2	3	2	3	2	2	3	2	2	2	2	3	2	3	3	2	2	2	3	6	5	5	5	5	5	6	4	5	3	3	2	2	2	3	3	3	3	2	3	3	2	2	2
SILK	chr20	11165116	11166116	3	2	2	2	2	3	2	2	2	2	2	2	2	2	2	3	2	3	2	2	2	2	5	4	5	4	4	4	5	4	4	2	2	2	2	2	3	2	2	2	2	2	3	2	2	2
SILK	chr20	11166116	11167116	3	2	2	3	3	2	3	3	3	2	3	3	2	2	3	4	2	3	3	4	3	3	5	5	6	4	7	5	5	5	5	4	3	2	3	3	3	4	3	3	3	2	3	3	2	3
SILK	chr20	11167116	11168116	3	3	2	3	3	3	3	2	2	3	2	3	2	2	3	3	3	3	3	3	2	2	6	5	5	5	5	5	6	5	6	3	3	3	3	3	3	3	3	2	2	3	3	2	2	2
SILK	chr20	11168116	11169116	3	3	3	2	3	3	3	2	3	2	3	3	3	2	2	2	2	3	3	3	2	3	4	5	5	4	4	6	5	5	5	3	3	3	2	3	4	3	2	3	2	2	3	2	2	3
SILK	chr20	11169116	11170116	2	2	3	2	2	2	2	2	2	2	2	2	2	2	2	3	2	2	2	3	2	3	6	5	6	5	4	5	5	4	5	3	3	2	2	3	3	2	2	2	1	2	3	3	2	2
SILK	chr20	11170116	11171199	1	1	2	2	1	2	2	2	2	1	1	1	1	1	2	2	2	2	1	2	2	2	3	3	4	3	3	4	3	3	3	2	2	2	2	2	1	1	2	2	1	1	1	2	1	1
SILK	chr20	11171199	11172199	2	2	2	2	2	2	2	2	2	2	2	2	2	2	2	2	2	3	3	3	2	2	5	3	4	4	5	5	4	4	5	3	3	2	3	2	2	2	2	2	2	2	2	2	3	2
SILK	chr20	11172199	11173199	2	3	2	2	2	2	2	2	2	3	2	3	3	2	2	3	2	3	3	2	2	2	5	5	5	5	3	4	5	4	5	2	2	2	2	2	3	2	2	3	2	2	3	2	2	2
SILK	chr20	11173199	11174199	2	2	2	2	2	2	2	2	2	2	2	2	2	2	2	3	3	2	3	3	2	2	5	4	5	4	4	5	5	6	4	3	3	2	2	2	3	3	3	2	3	3	2	2	2	2
SILK	chr20	11174199	11175199	2	2	3	2	2	2	3	2	3	2	3	2	2	3	2	2	2	2	2	3	2	2	5	5	4	4	4	6	4	5	5	3	2	2	2	3	3	2	3	3	2	2	3	2	2	3
SILK	chr20	11175199	11176669	2	2	2	1	2	1	2	2	1	1	2	2	1	2	1	2	2	2	2	2	1	2	3	3	4	3	4	4	3	3	3	2	2	1	1	2	1	2	2	1	2	2	1	2	2	2
SILK	chr20	11176669	11177669	2	2	3	3	2	3	2	2	3	3	3	2	2	3	3	3	3	2	2	2	3	2	5	6	4	5	4	5	6	6	6	3	3	2	2	2	3	3	3	3	3	2	2	2	2	3
SILK	chr20	11177669	11178669	3	2	3	3	2	3	2	3	3	3	3	2	2	2	3	3	3	3	3	3	2	2	5	5	5	5	5	6	5	5	5	3	3	3	3	3	3	3	3	2	3	2	3	1	3	2
SILK	chr20	11178669	11179669	2	2	2	2	2	2	3	2	2	2	2	3	2	2	2	2	3	2	3	3	3	2	5	5	6	5	4	5	5	4	4	3	2	2	2	2	3	2	2	2	2	1	2	2	3	2
SILK	chr20	11179669	11181802	2	2	2	2	2	2	2	1	2	2	2	2	2	2	2	2	2	2	3	3	2	2	4	4	5	4	3	4	5	5	4	2	2	1	2	2	2	2	2	1	1	1	2	2	2	1
SILK	chr20	11181802	11182802	2	2	2	2	2	2	1	2	2	2	2	2	2	2	2	2	2	3	2	2	2	2	4	3	4	4	3	4	5	4	5	2	2	2	2	2	2	2	2	2	2	2	2	2	1	2
SILK	chr20	11182802	11183802	2	2	2	3	2	2	3	3	2	2	2	2	2	3	2	2	2	3	2	3	3	3	6	5	6	5	4	5	6	5	4	3	3	2	2	2	3	2	2	2	3	2	3	2	2	2
SILK	chr20	11183802	11184855	2	2	3	2	2	2	2	2	2	2	2	2	2	2	2	2	2	3	2	3	2	2	4	5	4	5	4	4	4	4	5	2	3	2	2	2	3	2	2	2	2	2	2	2	2	2
SILK	chr20	11184855	11185905	2	2	1	2	3	2	2	3	2	2	2	2	2	2	3	2	2	2	3	2	2	2	4	4	5	4	4	4	4	5	4	2	3	2	2	2	3	2	3	2	2	2	2	2	2	2
SILK	chr20	11185905	11186905	3	3	2	2	3	2	2	2	3	2	2	2	2	2	2	3	3	2	3	3	2	2	5	5	5	5	4	5	4	5	5	3	3	3	2	3	2	3	3	2	2	2	3	3	2	2
SILK	chr20	11186905	11187905	2	2	3	2	2	2	2	3	2	2	2	2	3	2	2	2	2	2	3	3	3	2	4	5	5	5	4	4	5	4	4	3	3	2	1	3	2	3	2	2	1	3	2	2	2	3
SILK	chr20	11187905	11188905	2	2	1	3	3	2	2	2	2	2	2	2	2	2	2	3	3	3	3	3	2	2	4	5	5	5	4	4	4	5	4	2	3	2	2	3	3	2	3	2	2	2	2	2	3	2
SILK	chr20	11188905	11189905	2	2	3	2	3	2	3	2	2	2	2	2	2	2	2	3	3	3	3	2	2	2	5	6	5	5	5	5	5	5	5	3	3	2	2	2	2	3	3	2	2	3	2	2	2	2
SILK	chr20	11189905	11190905	2	2	2	2	2	2	1	2	2	2	2	2	2	2	2	3	3	2	2	2	2	2	4	5	3	3	3	5	5	4	5	1	2	2	3	2	3	2	2	3	2	2	2	1	3	2
SILK	chr20	11190905	11191905	2	2	2	2	2	2	2	2	2	2	2	2	2	2	2	2	3	3	2	2	2	2	4	5	5	4	5	4	4	5	4	2	2	2	2	2	2	3	3	2	2	2	2	2	3	2
SILK	chr20	11191905	11192905	3	2	2	2	2	2	2	2	2	2	2	2	2	2	3	2	3	3	3	3	2	2	4	4	4	5	6	4	4	4	3	3	3	3	2	2	2	2	3	2	2	2	2	3	2	2
SILK	chr20	11192905	11193905	2	2	2	2	2	2	2	2	2	2	3	2	2	2	2	3	2	2	2	3	2	3	4	5	4	5	5	3	4	3	4	2	2	2	2	2	2	2	2	2	2	2	2	3	2	2
SILK	chr20	11193905	11194905	2	2	3	2	2	2	2	2	2	2	3	2	2	2	3	3	2	2	2	3	2	2	4	4	5	4	6	4	4	4	4	2	3	2	3	2	2	2	2	2	2	2	2	3	2	2
SILK	chr20	11194905	11195955	2	2	2	2	2	2	2	2	1	2	2	2	2	2	2	2	2	2	2	3	2	2	4	4	5	4	4	4	3	4	4	2	2	2	2	2	2	2	2	2	2	2	2	2	2	2
SILK	chr20	11195955	11196955	2	2	2	3	2	2	2	2	2	3	2	2	2	2	2	2	3	3	2	3	2	3	5	3	5	5	4	5	4	4	4	2	2	2	3	3	2	2	2	2	2	2	2	2	2	2
SILK	chr20	11196955	11197990	1	1	2	2	2	1	2	2	2	2	1	2	2	2	2	2	2	3	2	2	2	2	4	4	5	5	3	4	4	4	4	2	2	2	2	3	2	2	2	2	2	2	1	1	2	2
SILK	chr20	11197990	11198990	2	2	2	2	2	2	2	2	2	3	2	2	2	2	2	2	2	2	3	2	2	2	4	4	4	4	5	5	4	5	4	2	3	2	2	2	2	2	3	2	2	2	2	2	2	1
SILK	chr20	11198990	11199990	2	2	2	2	2	2	2	2	3	2	2	2	3	2	2	2	2	3	3	3	2	2	4	5	5	5	4	5	5	5	4	2	2	3	2	3	2	3	2	3	2	2	2	2	2	3
SILK	chr20	11199990	11200990	2	2	2	2	2	2	2	2	2	2	2	2	2	3	3	3	3	3	2	3	2	2	5	5	5	6	4	5	5	5	5	3	3	2	2	3	2	3	2	2	2	2	2	2	2	2
SILK	chr20	11200990	11201990	2	2	2	2	2	2	2	2	1	2	2	2	2	2	2	2	2	3	2	2	2	2	4	4	4	4	3	4	4	5	4	2	2	2	2	2	2	2	2	1	2	2	2	2	1	2
SILK	chr20	11201990	11202990	1	1	1	1	1	1	1	2	1	1	1	1	1	1	1	1	1	1	1	1	1	2	2	2	2	2	2	2	2	2	2	1	1	1	1	1	1	1	1	1	1	1	1	1	2	1
SILK	chr20	11202990	11203990	2	3	2	3	2	2	2	2	2	2	3	2	2	2	3	3	3	3	3	3	2	2	5	5	5	5	5	5	5	4	4	3	3	2	2	3	2	2	2	2	2	2	3	2	2	2
SILK	chr20	11203990	11204990	2	2	2	3	2	2	2	2	2	2	2	2	2	2	3	2	3	3	2	3	2	2	5	5	4	4	5	4	4	4	5	3	2	2	2	3	2	2	4	2	2	3	2	2	2	3
SILK	chr20	11204990	11205990	2	2	2	2	2	2	2	2	2	2	2	2	2	2	2	2	2	3	2	1	2	2	4	5	5	5	3	5	3	4	4	2	3	2	2	3	2	2	3	2	1	2	2	2	2	2
SILK	chr20	11205990	11206990	3	2	3	2	3	2	2	2	2	2	2	2	2	2	3	3	3	3	2	3	3	3	5	4	5	4	4	4	4	4	5	4	3	2	2	2	2	3	2	2	2	2	2	3	2	2
SILK	chr20	11206990	11208525	2	2	2	2	2	2	2	1	1	2	2	2	2	2	2	2	2	2	2	2	2	2	4	5	4	4	4	5	4	4	4	2	2	2	2	2	2	2	1	1	2	2	1	2	2	2
SILK	chr20	11208525	11209525	2	2	1	2	1	1	1	1	2	2	1	2	1	2	2	2	2	1	2	1	3	2	4	3	4	4	3	4	3	4	4	2	1	2	2	1	2	1	2	2	1	2	2	2	2	2
SILK	chr20	11209525	11210525	2	2	2	2	1	2	2	1	1	2	2	2	2	2	3	2	2	3	2	2	2	3	4	5	5	4	3	4	4	4	5	2	2	2	2	2	2	3	2	2	1	2	2	1	2	1
SILK	chr20	11210525	11211525	2	2	2	2	2	1	2	2	2	2	2	3	2	2	2	3	3	2	3	2	3	3	5	5	5	4	4	4	4	5	5	3	2	2	3	3	2	2	3	2	2	2	2	3	2	2
SILK	chr20	11211525	11212525	2	2	2	3	3	2	3	2	3	2	2	2	2	2	3	3	3	3	3	3	2	3	5	4	5	6	6	4	5	4	5	3	2	2	3	2	2	2	3	2	2	2	2	2	2	2
SILK	chr20	11212525	11213525	2	3	2	2	3	3	2	2	2	3	2	2	2	2	2	3	2	3	3	2	2	2	5	5	5	4	5	5	5	4	4	3	3	2	3	3	2	3	3	2	2	2	2	1	3	2
SILK	chr20	11213525	11214525	2	2	2	2	2	2	2	2	2	2	2	2	2	2	2	2	3	3	1	2	2	3	4	4	5	4	4	5	4	5	5	2	2	2	2	2	2	2	2	2	2	1	2	2	2	2
SILK	chr20	11214525	11215525	2	2	2	2	2	2	2	2	2	2	2	2	2	2	2	2	2	2	2	3	2	2	4	4	4	4	7	3	3	3	3	3	1	2	2	2	2	2	2	2	2	2	2	2	2	2
SILK	chr20	11216861	11217861	2	2	2	2	2	2	2	2	2	3	2	2	2	2	2	2	2	2	2	3	2	2	3	3	4	4	5	3	3	4	3	2	2	2	2	2	2	2	2	2	2	2	2	2	2	2
SILK	chr20	11217861	11218927	2	2	2	2	2	2	2	2	1	2	2	2	2	2	2	2	2	2	2	3	2	2	4	5	4	4	5	4	3	3	4	2	2	2	2	2	2	2	3	2	2	2	2	2	2	2
SILK	chr20	11218927	11219927	3	2	2	2	2	2	2	2	2	2	2	2	2	2	3	2	3	3	3	3	2	2	5	6	6	5	5	4	4	5	4	2	3	2	2	2	3	3	2	2	2	2	2	2	2	2
SILK	chr20	11219927	11220927	2	3	2	2	2	1	2	2	2	2	2	2	3	2	2	2	2	3	2	3	2	2	4	5	5	4	4	4	4	5	4	3	2	2	3	3	3	3	2	1	2	3	2	2	2	2
SILK	chr20	11220927	11221927	2	2	2	2	2	3	2	2	3	2	2	2	3	2	2	2	3	3	2	3	2	2	5	5	6	6	4	5	4	5	5	2	3	2	2	2	2	3	3	2	2	2	2	1	2	3
SILK	chr20	11221927	11222959	2	2	3	2	2	2	3	2	1	2	2	2	2	3	3	3	3	3	2	3	2	2	4	6	5	4	4	4	5	5	4	3	2	2	3	2	2	3	2	2	2	2	2	2	3	2
SILK	chr20	11222959	11223959	2	2	3	2	2	2	2	2	2	2	2	3	2	3	2	2	3	2	2	2	2	2	4	5	4	5	5	5	5	4	5	3	3	2	2	2	3	3	3	2	2	2	2	2	2	2
SILK	chr20	11223959	11225393	2	2	2	2	2	2	2	2	2	2	3	2	2	2	2	2	2	2	2	3	2	2	4	5	4	4	5	5	3	4	4	3	2	2	2	3	2	2	2	2	2	1	2	2	2	2
SILK	chr20	11225393	11226393	3	2	2	2	2	2	2	2	2	2	2	2	3	2	2	3	3	2	3	3	2	2	4	4	5	5	4	5	5	5	5	3	2	2	2	2	2	2	3	3	2	2	2	2	2	2
SILK	chr20	11226393	11227393	2	2	2	2	1	2	2	2	2	1	2	2	2	2	2	2	2	2	3	2	2	2	5	4	5	3	4	5	5	5	5	2	2	2	2	2	2	2	2	2	2	2	2	2	2	2
SILK	chr20	11227393	11228570	2	3	2	2	2	2	3	2	2	2	2	2	2	2	2	3	3	3	2	2	3	2	5	4	5	4	4	5	4	4	4	2	3	2	1	2	2	2	2	2	2	2	2	2	2	3
SILK	chr20	11228570	11229570	2	2	2	2	2	2	2	3	3	2	2	2	2	2	3	2	3	3	2	3	2	2	6	5	5	6	4	5	4	5	5	2	2	2	2	3	2	3	2	2	2	2	2	2	2	2
SILK	chr20	11229570	11230570	2	2	2	2	2	2	2	2	2	2	2	2	2	2	3	2	2	2	2	3	2	2	4	4	4	4	4	4	4	4	4	3	2	2	3	2	2	2	2	2	2	3	2	2	2	2
SILK	chr20	11230570	11231570	3	2	2	2	2	2	2	2	2	2	2	2	3	2	3	2	2	2	2	3	2	2	4	3	4	5	5	5	4	4	4	3	2	2	2	3	2	3	2	2	2	2	2	3	2	2
SILK	chr20	11231570	11232570	3	2	2	3	2	2	2	3	2	2	2	2	2	3	3	2	3	2	3	3	2	3	5	4	6	6	5	6	5	5	5	3	3	2	3	3	3	3	3	2	2	2	2	2	2	2
SILK	chr20	11232570	11233570	2	3	2	2	2	2	3	2	2	3	2	2	2	3	3	2	3	3	2	2	2	3	5	5	5	4	4	5	5	4	5	3	2	2	2	3	3	2	3	2	2	2	3	2	3	2
SILK	chr20	11233570	11234570	2	2	2	2	2	2	2	2	2	2	2	2	2	2	3	2	2	2	2	3	3	2	5	4	5	5	7	5	4	4	4	2	3	2	2	2	2	2	3	2	2	2	2	2	2	3
SILK	chr20	11234570	11235570	2	1	2	2	2	1	2	2	2	2	2	2	2	2	2	2	2	2	3	2	2	2	3	4	4	3	4	4	4	3	4	2	2	2	2	2	2	2	2	2	2	2	2	2	2	2
SILK	chr20	11235570	11236608	2	1	1	2	1	1	2	2	1	1	2	2	2	2	2	2	2	2	1	2	2	2	4	4	4	4	4	3	3	3	3	2	2	1	2	2	1	1	1	2	2	1	2	1	1	1
SILK	chr20	11236608	11237608	2	3	2	2	3	2	2	3	3	3	2	2	2	3	3	4	2	3	3	3	2	2	5	6	6	5	7	4	5	4	5	3	3	3	3	3	3	2	2	2	3	2	3	3	2	2
SILK	chr20	11237608	11238608	2	2	2	3	2	2	2	3	2	2	2	2	2	2	2	3	3	3	3	2	3	2	5	5	4	5	4	5	5	5	4	2	2	2	2	3	2	3	2	2	2	2	2	2	2	2
SILK	chr20	11651607	11652607	3	3	3	2	2	3	2	2	2	3	2	2	3	2	3	3	3	2	3	3	2	2	5	5	5	5	5	5	5	4	5	2	3	2	3	3	3	3	3	2	2	3	3	2	2	2
SILK	chr20	11652607	11653607	3	2	2	2	2	2	2	3	2	2	3	3	2	2	2	2	2	3	3	2	2	2	4	5	5	4	4	4	4	4	4	2	2	2	2	2	2	2	2	3	2	2	2	3	2	2
SILK	chr20	11653607	11654607	2	2	2	2	2	3	3	2	3	3	2	3	3	2	2	3	2	2	3	2	2	2	4	6	4	4	4	5	5	6	4	2	2	2	2	2	2	3	3	2	3	3	2	2	3	3
SILK	chr20	11654607	11655607	3	3	2	3	2	2	2	2	2	2	2	3	2	3	2	2	2	2	3	2	2	3	4	5	4	4	4	5	5	4	5	3	3	2	2	3	3	2	2	2	3	2	3	2	2	2
SILK	chr20	11655607	11656607	2	2	2	2	2	3	2	2	2	2	2	2	2	2	1	2	2	2	2	2	2	2	4	5	6	4	3	5	5	5	4	2	2	2	2	2	2	2	3	2	2	2	2	2	2	2
SILK	chr20	11656607	11657607	2	1	2	2	2	2	2	2	2	2	2	2	2	2	2	2	2	2	2	2	2	2	4	4	4	4	4	4	4	4	4	2	2	2	2	2	3	2	2	2	2	2	2	2	3	2
SILK	chr20	11657607	11658607	2	3	2	3	2	2	3	2	2	3	2	2	3	2	2	3	2	3	3	3	2	3	6	4	5	4	5	5	5	6	5	3	2	2	2	2	3	2	2	2	3	3	3	3	3	3
SILK	chr20	11658607	11659607	2	3	3	3	3	3	2	3	2	3	3	2	2	2	3	3	2	3	3	2	2	3	5	5	5	5	4	5	5	5	6	2	3	2	3	3	2	2	3	2	3	3	2	3	2	2
SILK	chr20	11659607	11660607	3	3	3	2	3	3	3	2	2	3	4	3	2	2	3	3	3	3	3	4	2	2	5	5	6	4	5	5	5	7	4	3	3	3	3	2	3	3	2	2	3	3	2	2	2	2
SILK	chr20	11660607	11661607	3	3	3	2	3	2	2	2	2	3	3	2	2	2	2	2	2	2	2	3	2	2	5	6	4	4	6	4	4	5	4	3	3	3	2	2	3	3	3	2	3	2	3	2	2	2
SILK	chr20	11661607	11662607	3	3	2	2	2	2	2	2	2	3	2	3	2	2	2	2	2	2	2	3	2	2	5	5	5	4	4	5	4	4	5	2	3	2	2	2	3	2	3	2	2	3	2	2	2	2
SILK	chr20	11662607	11663641	1	2	2	2	2	2	2	2	2	2	2	2	2	2	2	3	2	2	2	2	2	2	4	4	3	4	4	4	4	4	5	2	2	2	2	2	2	2	2	2	2	2	2	2	2	2
SILK	chr20	11663641	11664641	2	3	3	3	3	3	3	2	2	3	2	2	2	2	2	3	3	2	2	3	2	2	6	5	5	4	4	6	6	6	6	2	3	3	3	2	2	3	2	3	3	3	2	3	3	2
SILK	chr20	11664641	11665641	1	2	3	2	2	2	2	2	2	2	2	2	2	2	2	2	2	2	2	2	2	2	4	3	4	4	3	5	5	4	4	2	2	2	2	2	2	2	2	2	2	2	1	2	2	2
SILK	chr20	11665641	11666641	3	2	2	2	2	2	3	2	2	3	2	2	2	2	2	2	2	2	2	3	2	2	5	4	5	4	5	4	5	4	4	2	2	2	2	2	2	3	3	3	3	3	2	2	2	2
SILK	chr20	11666641	11667675	2	2	2	2	1	2	2	2	2	2	2	2	2	2	2	2	2	2	2	2	2	2	4	4	4	3	3	3	4	4	3	2	2	2	2	2	2	2	2	2	2	2	2	1	1	2
SILK	chr20	11667675	11668675	2	2	2	2	3	2	2	2	2	3	2	2	3	2	2	2	2	2	3	3	2	2	5	5	4	5	4	4	5	5	5	3	2	2	2	3	2	3	2	2	2	3	2	2	2	2
SILK	chr20	11668675	11669675	2	2	2	2	2	2	2	2	2	3	2	2	2	1	2	2	2	2	2	2	2	2	5	4	5	4	5	4	4	4	4	2	2	2	2	2	1	3	3	2	2	3	2	2	2	2
SILK	chr20	11669675	11670675	3	3	3	2	2	3	3	2	2	2	2	2	2	2	2	2	2	2	2	2	3	2	6	5	4	4	3	5	5	4	5	2	3	2	2	2	3	2	3	3	2	3	2	2	3	2
SILK	chr20	11670675	11671675	2	2	3	3	3	3	3	2	3	3	2	2	3	3	3	3	2	3	3	3	2	2	5	6	5	5	5	5	5	5	5	3	3	2	2	2	2	3	3	3	2	3	3	3	2	3
SILK	chr20	11671675	11672675	3	2	2	2	2	3	2	2	3	2	2	2	3	2	2	2	2	3	3	2	2	2	4	4	5	4	4	4	5	4	5	2	2	2	2	2	3	2	2	2	2	2	3	3	2	2
SILK	chr20	11672675	11673675	2	2	2	2	2	2	2	2	2	2	3	2	2	2	2	2	2	2	2	2	2	2	4	4	4	4	5	4	4	4	4	2	2	2	2	3	2	2	2	3	2	3	2	2	3	3
SILK	chr20	11673675	11674675	2	2	2	2	1	2	2	2	3	2	2	2	2	2	2	2	2	3	2	2	2	2	4	4	5	5	4	4	4	4	4	3	2	2	2	2	2	2	2	2	2	3	2	2	2	2
SILK	chr20	11674675	11675790	2	1	2	2	2	2	2	2	2	2	1	2	2	2	2	2	2	1	2	2	1	2	4	4	3	3	5	3	3	3	4	3	2	1	2	2	2	2	2	2	2	2	2	2	2	2
SILK	chr20	11675790	11676790	2	3	2	2	2	2	2	2	2	2	2	2	2	2	2	2	2	2	2	2	2	2	4	5	4	5	3	6	4	5	4	2	2	2	2	3	2	2	2	2	1	2	2	2	3	2
SILK	chr20	11676790	11677790	2	2	2	2	2	2	2	2	2	2	2	2	2	2	2	2	2	2	2	2	2	2	5	4	5	5	4	4	4	4	5	2	2	2	2	2	2	2	2	2	2	2	2	3	2	2
SILK	chr20	11677790	11678790	2	2	2	2	2	1	2	2	2	2	3	3	2	2	2	2	2	2	3	3	2	2	5	4	5	5	4	5	4	5	5	2	2	2	3	2	3	2	3	3	3	2	2	2	2	2
SILK	chr20	11678790	11679790	2	2	2	3	2	3	2	3	2	2	3	3	3	2	2	2	2	2	3	3	2	2	5	5	5	5	5	5	5	5	6	3	2	2	2	2	3	3	3	3	2	2	2	2	2	3
SILK	chr20	11679790	11680790	3	3	2	2	2	4	3	3	2	3	2	2	3	3	2	2	2	3	3	2	2	2	5	5	5	5	5	5	6	5	4	3	2	2	2	3	2	3	2	3	3	2	2	2	3	2
SILK	chr20	11680790	11681790	2	2	2	1	1	2	2	2	1	2	2	2	2	2	2	1	2	2	2	2	2	2	3	4	5	3	3	3	4	3	4	2	2	2	2	2	2	2	2	2	2	2	1	2	2	2
SILK	chr20	11681790	11682790	3	2	3	3	2	2	3	2	2	2	3	2	2	2	3	2	2	2	2	2	2	2	5	5	5	5	4	4	4	4	4	3	2	2	2	2	2	3	2	2	3	3	2	2	2	3
SILK	chr20	11682790	11683790	2	2	2	1	2	2	2	2	2	2	2	2	2	1	1	2	2	2	2	2	2	2	4	4	4	3	3	4	4	4	5	2	2	2	2	1	2	2	2	2	2	2	2	2	2	2
SILK	chr20	11683790	11684846	1	2	2	2	2	1	2	2	2	2	2	2	1	1	1	1	1	2	2	1	2	2	2	3	2	3	2	3	3	3	3	2	1	2	1	2	2	1	2	1	1	2	1	2	2	1
SILK	chr20	11684846	11685846	3	2	2	2	2	2	2	2	2	2	2	2	2	2	2	2	2	2	2	2	2	2	4	5	4	4	5	4	4	4	5	2	2	2	2	2	2	2	2	2	2	2	2	3	2	2
SILK	chr20	11685846	11686846	2	2	2	2	2	2	2	2	2	2	2	3	2	2	2	2	2	2	2	2	2	2	4	4	4	3	4	5	5	4	4	3	2	2	2	2	2	2	2	2	2	2	2	2	2	3
SILK	chr20	11686846	11687846	2	2	3	2	2	2	2	2	2	2	2	2	2	2	2	2	2	2	2	2	2	2	4	4	5	4	4	4	4	4	3	3	2	2	2	3	2	2	3	2	2	2	3	2	3	2
SILK	chr20	11687846	11688846	3	3	2	2	3	2	3	2	3	2	2	3	3	3	3	2	3	3	3	3	2	2	6	4	6	4	5	4	5	5	5	3	3	2	2	3	3	3	3	2	2	3	3	2	3	3
SILK	chr20	11688846	11689846	3	3	2	2	2	2	3	2	3	2	3	3	3	3	2	2	2	2	3	3	3	2	5	5	6	5	5	5	4	5	5	2	3	2	3	2	3	3	3	3	2	3	3	2	3	2
SILK	chr20	11689846	11690884	2	2	2	2	2	2	2	2	2	3	1	2	2	2	2	2	2	2	2	2	2	2	4	4	4	4	3	3	4	4	4	2	2	2	2	2	2	2	2	3	2	2	2	2	2	2
SILK	chr20	11690884	11691884	2	2	2	2	2	3	2	2	2	2	2	2	2	3	2	2	3	3	3	2	3	2	5	5	5	5	4	5	5	5	4	3	2	3	2	2	3	3	2	2	2	3	2	2	2	3
SILK	chr20	11691884	11692884	2	2	2	3	2	2	2	2	3	3	2	2	3	3	3	2	2	3	3	3	2	3	5	5	5	5	4	5	5	5	5	2	2	2	2	2	1	2	2	3	3	2	3	2	2	2
SILK	chr20	11692884	11693884	3	3	2	2	2	2	2	2	3	3	2	2	2	2	2	2	2	2	2	3	2	2	5	4	4	4	5	5	5	4	4	2	2	2	2	2	2	2	2	2	2	1	2	2	2	2
SILK	chr20	11693884	11694884	2	2	2	2	2	2	2	3	3	2	2	3	2	2	2	2	2	3	3	3	2	2	4	4	4	4	5	4	4	4	5	3	3	2	2	3	2	3	3	2	3	3	3	2	2	3
SILK	chr20	11694884	11695884	2	2	2	2	2	2	2	3	2	1	2	2	2	2	2	2	2	2	2	2	3	2	4	5	4	6	3	5	5	5	4	2	3	2	2	2	3	2	2	2	3	2	2	2	2	2
SILK	chr20	11695884	11696884	2	2	2	2	2	2	2	2	2	2	2	3	2	2	2	2	2	2	2	2	2	2	4	4	4	4	3	4	4	4	4	2	2	2	2	2	2	2	2	2	2	2	2	2	2	2
SILK	chr20	11696884	11697914	2	2	2	2	1	2	2	2	2	2	2	2	2	2	2	2	2	2	2	2	2	2	3	4	4	3	4	3	3	4	4	2	2	2	1	2	1	2	2	2	1	2	2	2	1	2
SILK	chr20	11697914	11698914	2	1	1	2	2	1	2	2	2	2	3	2	2	1	1	2	1	2	2	2	2	2	4	3	4	3	3	4	4	4	4	2	2	1	2	2	1	2	2	1	2	2	1	1	2	2
SILK	chr20	11698914	11699951	2	2	1	2	2	2	2	2	2	2	2	2	2	2	1	2	2	1	2	2	2	1	3	4	3	4	3	3	4	4	4	2	2	1	2	2	2	2	2	2	2	2	2	2	2	2
SILK	chr20	11699951	11701000	1	1	2	1	1	1	1	2	1	2	1	1	1	1	1	2	2	1	2	1	2	2	3	3	3	3	3	3	3	3	4	2	2	2	1	1	1	1	1	1	1	1	2	1	2	2
SILK	chr20	11701000	11702000	2	2	2	2	2	2	2	2	2	2	2	2	2	2	2	2	2	2	2	2	3	2	5	4	4	4	4	4	4	4	5	2	2	2	2	3	2	2	2	2	2	2	2	2	2	2
SILK	chr20	11702000	11703000	2	2	2	3	2	2	2	2	2	2	2	2	2	2	2	2	2	2	2	2	2	2	4	4	4	3	5	3	4	4	4	2	2	2	2	1	2	2	2	2	2	2	2	2	2	2
SILK	chr20	11703000	11704000	3	2	2	2	2	2	2	2	2	2	2	2	2	2	2	2	2	2	2	2	2	2	5	5	4	4	4	3	4	4	4	2	2	2	2	1	2	2	2	2	3	2	3	2	2	2
SILK	chr20	11704000	11705000	2	2	2	2	2	3	2	2	2	2	2	2	2	2	2	2	2	2	2	3	2	2	5	4	5	4	4	4	4	4	5	2	2	2	2	1	1	2	2	2	2	2	2	2	2	2
SILK	chr20	11705000	11706000	2	2	2	2	2	2	2	2	2	2	2	2	2	2	2	2	2	2	2	2	2	2	4	3	4	4	4	3	4	3	3	2	2	2	2	2	2	2	2	2	2	2	2	2	2	2
SILK	chr20	11706000	11707000	1	2	2	2	1	2	2	2	2	2	2	2	2	2	2	2	2	2	2	2	2	2	4	4	4	3	4	4	3	4	3	3	2	2	2	2	2	2	2	1	2	2	1	2	2	2
SILK	chr20	11707000	11708000	2	2	2	2	2	2	2	2	2	2	2	2	2	2	2	2	2	2	2	2	2	2	4	4	4	4	5	4	4	5	4	2	2	2	2	2	2	2	2	2	2	2	2	2	2	2
SILK	chr20	11708000	11709000	3	2	2	2	2	2	2	2	1	2	2	2	2	2	2	2	2	2	1	2	2	2	4	4	4	3	4	4	4	4	4	2	2	2	2	2	2	3	2	2	2	2	2	2	2	2
SILK	chr20	11709000	11710000	2	2	2	2	2	2	2	2	2	2	2	2	2	2	2	2	2	2	3	2	2	2	5	4	3	5	5	4	4	5	4	3	2	2	2	2	2	2	2	2	2	2	2	2	2	2
SILK	chr20	11710000	11711000	2	2	2	2	2	3	2	2	2	2	2	2	2	3	2	2	2	2	2	2	2	2	5	4	5	4	4	4	5	5	5	2	2	2	2	3	3	2	2	2	3	2	2	2	2	2
SILK	chr20	11711000	11712000	2	1	2	2	2	1	2	2	2	2	2	2	2	2	1	1	2	2	2	2	2	2	4	3	5	4	3	3	4	4	4	2	2	2	2	2	2	2	2	2	2	2	2	1	2	2
SILK	chr20	11712000	11713000	2	2	2	2	2	2	2	2	2	2	2	2	2	2	2	2	2	2	2	2	2	2	5	3	4	3	4	3	4	4	5	2	2	2	2	2	2	2	2	2	2	2	2	2	2	2
SILK	chr20	11713000	11714000	2	2	2	2	2	3	2	2	2	2	3	2	3	2	3	2	3	3	3	2	3	2	5	4	5	4	3	4	5	4	5	2	2	3	2	2	2	3	3	3	2	2	1	2	3	2
SILK	chr20	11714000	11715737	1	2	2	2	2	2	2	2	2	2	2	2	1	2	2	2	2	2	2	2	2	2	4	4	4	3	4	4	4	3	3	3	2	2	2	2	2	2	3	2	2	1	1	2	2	2
SILK	chr20	11715737	11716737	2	2	2	2	2	2	2	2	2	2	2	2	2	2	2	2	3	2	2	2	2	2	4	4	4	4	3	4	4	4	4	2	2	2	2	2	2	2	2	2	2	2	2	1	2	2
SILK	chr20	11716737	11717874	2	2	2	2	2	2	2	2	1	2	2	2	2	2	2	2	3	2	2	2	2	2	5	5	4	4	6	5	3	4	4	2	2	2	3	2	2	2	2	2	3	2	2	2	2	2
SILK	chr20	11717874	11718874	2	2	2	2	2	2	2	2	2	2	2	2	2	2	2	2	2	2	2	2	2	2	5	5	5	4	4	4	4	4	4	3	2	2	2	2	2	2	2	2	2	3	2	2	2	2
SILK	chr20	11718874	11719874	2	2	2	2	2	3	2	2	3	3	2	3	2	2	2	3	2	2	2	2	2	2	4	4	4	4	5	4	4	4	4	2	2	2	2	2	2	2	2	2	2	2	2	3	2	2
SILK	chr20	11719874	11720874	2	2	2	2	2	3	2	2	1	2	2	2	2	2	2	2	2	2	2	2	2	2	4	5	5	4	3	5	5	4	4	2	2	2	2	2	2	2	2	2	2	2	2	3	2	3
SILK	chr20	11720874	11721874	2	2	2	2	2	2	2	2	2	2	2	2	2	2	2	2	3	2	2	2	2	2	5	4	4	4	3	4	4	5	3	2	2	2	2	2	2	2	2	2	2	2	2	2	2	2
SILK	chr20	11721874	11723176	2	2	2	2	2	2	2	2	1	1	1	1	2	2	2	1	2	2	1	1	2	2	4	3	4	4	2	4	4	5	3	2	2	1	2	1	2	1	1	2	1	1	1	1	1	1
SILK	chr20	11723176	11724230	2	2	2	2	2	2	1	2	2	2	2	2	2	3	2	2	1	2	2	2	2	2	3	3	4	3	3	4	3	4	5	1	2	2	2	2	2	2	2	2	2	2	2	2	2	2
SILK	chr20	11724230	11725230	2	2	2	2	2	1	2	2	2	2	3	2	2	2	2	2	2	2	2	3	2	2	4	4	4	4	3	4	4	4	5	2	2	2	2	2	2	2	2	2	2	2	2	2	2	2
SILK	chr20	11725230	11726230	2	2	2	2	2	2	2	2	2	2	2	2	3	3	3	2	2	3	2	2	2	2	6	5	6	5	5	5	5	5	5	3	3	2	2	2	2	2	2	3	3	3	2	3	3	2
SILK	chr20	11726230	11727230	2	2	2	2	2	2	2	2	2	2	2	2	2	2	2	2	2	2	2	2	2	2	5	5	4	3	4	5	4	5	5	2	2	2	2	2	2	2	3	3	3	2	3	2	2	2
SILK	chr20	11727230	11728230	2	1	2	2	1	2	2	2	2	1	2	2	2	1	2	2	1	2	2	3	2	2	5	4	5	4	3	4	4	4	4	2	2	2	2	2	1	1	2	2	2	3	2	2	2	2
SILK	chr20	11728230	11729316	2	2	2	2	2	3	2	2	2	2	2	2	2	2	2	2	2	2	2	3	1	2	5	4	4	4	4	4	4	5	5	2	2	2	3	2	2	2	2	2	2	2	3	2	2	2
SILK	chr20	11729316	11730316	2	2	2	2	2	2	1	2	2	2	2	2	2	2	1	2	2	2	2	2	2	2	4	4	4	4	5	4	4	4	3	2	2	2	2	2	2	2	2	2	2	2	2	2	2	2
SILK	chr20	11730316	11731316	2	2	2	2	2	2	2	2	2	2	2	2	2	2	2	2	2	2	2	2	2	2	4	4	4	4	4	4	4	4	4	2	2	2	2	2	2	2	2	2	2	2	2	2	2	2
SILK	chr20	11731316	11732316	2	2	1	1	2	1	1	2	2	2	2	2	2	2	2	2	2	3	2	2	2	2	3	3	4	4	4	4	4	4	3	2	2	2	2	3	1	2	2	2	1	2	2	2	1	2
SILK	chr20	11732316	11733316	2	3	2	2	3	2	2	2	2	3	2	3	2	2	3	2	2	2	3	3	2	2	4	5	5	5	5	5	5	5	6	3	2	2	3	2	3	3	2	1	3	2	3	3	2	2
SILK	chr20	11733316	11734405	2	2	2	2	2	3	2	2	2	2	2	2	2	2	2	2	2	1	2	2	2	2	4	5	4	4	5	5	4	3	5	2	2	2	2	2	2	2	2	2	2	2	2	2	2	1
SILK	chr20	11734405	11735405	2	2	2	2	2	2	2	2	2	2	1	2	2	2	2	2	3	1	2	2	2	2	5	5	4	4	3	4	4	4	3	2	2	1	2	2	2	2	2	3	2	1	2	2	2	2
SILK	chr20	11735405	11736405	2	2	2	2	2	2	2	2	3	2	2	2	3	3	2	2	2	2	3	2	2	3	4	3	4	4	4	4	5	4	3	2	2	2	2	3	2	3	3	2	3	3	2	2	2	2
SILK	chr20	11736405	11737447	2	2	2	2	2	2	2	2	2	2	2	2	2	2	1	3	2	2	2	2	2	2	4	4	4	4	3	4	5	4	4	1	2	2	2	3	2	2	2	2	2	2	2	1	2	1
SILK	chr20	11737447	11738496	2	2	1	2	1	2	2	2	1	1	2	1	2	2	1	2	1	2	2	1	1	2	3	4	4	3	3	4	3	3	4	1	2	2	1	1	1	2	2	1	1	2	1	2	1	1
SILK	chr20	11738496	11739496	3	2	3	3	2	2	3	2	2	2	2	3	2	3	2	3	2	2	2	2	2	2	5	5	4	5	5	5	5	4	5	2	3	2	2	2	2	2	2	1	2	2	2	2	2	2
SILK	chr20	11739496	11740496	2	2	2	2	2	2	2	2	2	2	2	2	2	2	3	2	2	2	2	2	2	3	5	4	4	4	5	5	5	4	4	2	2	2	2	2	2	2	2	2	2	3	2	2	2	2
SILK	chr20	11740496	11741496	3	3	2	3	3	2	3	2	3	3	2	2	2	3	2	3	3	3	3	3	2	2	5	5	5	6	5	5	5	5	6	3	3	2	3	2	4	2	2	3	3	2	3	2	3	3
SILK	chr20	11741496	11742496	2	2	2	2	2	2	2	2	2	2	2	2	2	2	2	2	2	2	1	2	2	2	4	5	4	5	4	4	5	5	4	2	2	2	2	2	2	2	2	2	2	2	2	2	2	2
SILK	chr20	11742496	11743496	1	2	2	2	2	2	2	2	2	2	2	2	2	2	2	2	2	2	2	2	2	2	3	4	3	4	3	3	5	4	4	2	2	2	2	2	2	2	2	2	3	2	1	2	3	1
SILK	chr20	11743496	11744496	2	2	2	2	2	2	3	2	2	2	2	2	3	2	2	2	2	2	3	2	2	2	3	5	5	4	5	4	4	4	3	3	2	2	2	2	2	2	2	2	3	2	2	2	2	2
SILK	chr20	11744496	11745496	2	2	2	2	2	2	3	3	2	2	3	2	3	2	2	2	2	2	2	2	2	2	5	4	4	4	4	5	4	4	4	2	2	2	2	3	2	2	2	3	2	2	2	2	2	2
SILK	chr20	11745496	11746496	3	2	2	3	2	2	3	2	2	3	3	3	2	2	2	2	3	3	2	2	2	3	4	4	4	5	4	5	6	4	4	3	3	2	2	2	2	2	3	3	3	3	2	2	2	2
SILK	chr20	11746496	11747496	2	2	2	2	2	2	2	2	2	2	2	2	3	2	2	2	2	2	2	2	2	2	5	5	5	4	4	5	4	4	5	2	2	2	2	2	2	2	2	2	2	2	2	1	2	3
SILK	chr20	11747496	11748535	2	2	2	2	2	1	2	2	1	2	2	2	2	2	2	2	2	2	2	2	2	2	3	5	4	4	3	5	4	3	4	2	2	2	2	2	2	2	2	2	1	2	2	2	2	2
SILK	chr20	11748535	11749535	3	2	2	2	2	2	2	2	3	2	3	2	2	3	2	2	2	2	2	2	2	2	4	4	4	3	4	5	5	5	5	2	3	2	2	2	2	2	3	2	2	3	2	2	3	2
SILK	chr20	11749535	11750535	2	2	2	2	2	1	2	2	2	2	2	2	2	1	2	1	2	2	2	1	2	2	4	4	4	4	3	4	4	4	5	2	1	2	2	1	2	2	1	2	2	2	1	2	2	2
SILK	chr20	11750535	11751535	3	3	3	3	3	2	3	2	2	2	3	2	2	3	3	3	2	3	3	3	2	3	5	5	5	5	5	4	5	4	5	2	3	2	2	2	3	3	2	2	2	2	2	2	3	2
SILK	chr20	11751535	11752535	2	2	3	2	2	2	2	2	3	2	2	2	2	2	2	3	2	2	2	2	3	2	5	5	4	5	5	4	5	4	3	2	2	2	3	3	2	3	2	2	3	2	2	2	2	2
SILK	chr20	11752535	11753535	2	2	2	2	2	2	2	2	2	2	2	2	2	2	2	2	2	2	1	2	1	2	4	4	4	4	5	5	3	4	4	2	2	2	2	2	2	2	2	2	2	2	2	2	2	2
SILK	chr20	11753535	11754813	2	3	3	3	2	1	2	2	2	2	2	2	2	3	2	2	2	2	2	2	2	2	5	5	4	4	4	5	4	5	5	2	2	2	2	2	2	2	3	2	2	2	1	3	2	2
SILK	chr20	11754813	11755849	1	1	2	2	1	1	1	2	2	1	1	2	1	2	2	1	1	1	2	1	2	2	3	3	3	3	4	3	4	3	3	2	2	3	2	1	2	2	2	1	2	2	1	2	1	2
SILK	chr20	11755849	11756849	2	2	2	2	1	2	2	2	2	1	1	2	1	2	1	2	2	2	2	1	3	2	4	3	3	4	4	4	3	3	3	2	2	2	2	1	2	1	2	2	2	1	1	2	2	1
SILK	chr20	11756849	11757849	2	3	3	3	3	3	2	2	2	3	3	2	2	2	2	2	2	3	3	2	2	2	5	5	4	4	5	4	5	4	4	2	2	2	2	3	3	3	2	2	2	2	2	2	2	2
SILK	chr20	11757849	11758849	2	2	3	2	2	2	2	2	2	2	2	2	2	3	2	2	2	2	2	2	2	2	5	5	4	5	4	5	3	5	4	2	2	2	2	2	3	2	2	2	2	2	2	2	2	2
SILK	chr20	11758849	11759849	2	2	2	2	2	2	2	2	2	2	2	2	2	2	1	2	2	2	2	2	2	2	4	3	3	3	3	5	5	3	4	1	2	2	2	2	2	2	2	2	2	2	2	2	1	2
SILK	chr20	11759849	11760849	2	2	2	2	2	3	2	2	2	3	2	2	2	2	2	2	2	2	2	2	2	2	5	4	5	4	4	4	5	4	4	2	2	2	2	2	3	2	2	3	2	3	3	3	2	2
SILK	chr20	11760849	11761899	2	2	1	2	2	2	2	1	2	2	1	2	1	2	1	1	2	2	2	1	2	2	3	3	3	3	3	4	3	4	3	2	1	2	2	2	2	2	2	2	1	2	1	2	2	2
SILK	chr20	11761899	11762971	2	1	1	1	2	2	1	2	1	2	2	2	2	2	1	1	1	2	1	1	1	1	3	3	3	4	3	4	2	3	3	1	1	2	2	1	2	1	1	2	2	2	2	1	2	1
SILK	chr20	11762971	11763971	2	2	2	3	2	2	2	2	2	2	2	2	3	3	2	2	3	2	2	2	2	2	5	4	4	5	6	5	4	4	4	2	2	2	3	2	2	2	2	2	2	2	2	2	2	2
SILK	chr20	11763971	11764971	2	3	2	2	2	3	2	2	3	3	2	2	3	3	3	3	2	2	3	2	2	2	5	5	5	4	5	4	5	5	4	2	2	2	3	3	3	2	2	3	2	2	2	2	2	3
SILK	chr20	11764971	11765971	2	2	2	2	1	2	2	2	2	2	2	2	2	2	2	2	2	2	2	2	2	2	3	4	3	4	4	4	4	5	4	2	2	2	2	2	2	2	1	3	2	2	2	2	1	2
SILK	chr20	11765971	11766971	2	2	2	1	2	2	1	2	2	2	2	2	2	2	2	2	2	2	3	3	2	2	4	5	5	4	4	5	5	4	5	2	3	2	3	2	2	2	2	3	2	3	2	2	2	2
SILK	chr20	11766971	11767971	2	2	2	2	2	2	2	2	2	2	2	2	2	2	2	2	2	2	2	2	2	2	3	4	4	3	5	3	4	4	4	2	2	2	2	1	2	2	2	2	2	2	2	2	2	2
SILK	chr20	11767971	11768971	3	2	3	2	2	3	2	2	2	2	2	2	2	2	2	3	2	2	2	2	2	2	3	4	3	4	4	4	4	4	4	2	2	2	2	2	2	2	2	2	2	2	3	3	2	2
SILK	chr20	11768971	11769971	2	2	2	2	2	2	2	2	2	2	2	2	2	2	1	2	2	2	2	2	2	2	4	5	4	3	2	4	4	4	4	2	2	2	1	2	2	2	2	1	1	3	2	2	2	2
SILK	chr20	11769971	11770971	2	2	2	2	2	2	2	2	2	3	2	2	2	2	2	2	2	2	2	2	2	2	4	4	4	3	4	5	4	4	5	2	2	2	2	2	2	2	2	1	2	3	2	2	2	3
SILK	chr20	11770971	11771971	2	3	2	2	2	2	2	2	3	2	2	2	2	3	1	2	2	2	2	2	2	3	4	3	3	4	3	4	4	4	4	2	2	1	2	2	2	2	2	2	2	2	2	2	3	2
SILK	chr20	11771971	11772971	2	2	2	2	2	2	3	2	2	2	2	2	2	2	2	2	2	2	2	2	2	2	5	3	4	4	6	4	4	4	3	2	2	2	2	2	2	3	3	2	2	2	2	2	2	2
SILK	chr20	11772971	11773971	2	2	2	2	2	2	2	2	2	2	2	2	2	2	2	2	2	2	3	2	3	2	5	4	4	5	7	4	4	4	4	2	2	2	2	2	2	2	2	2	1	2	2	2	1	2
SILK	chr20	11773971	11775020	2	2	2	2	2	2	2	2	2	2	2	2	2	2	2	2	2	2	2	2	2	2	3	3	4	4	4	4	4	3	3	1	2	2	2	2	2	2	1	2	2	3	2	2	2	2
SILK	chr20	11775020	11776099	2	1	1	2	2	2	1	2	2	2	2	2	2	2	1	2	1	2	2	2	2	2	4	4	4	4	4	3	4	4	4	2	2	2	2	2	2	2	2	2	2	2	2	2	2	2
SILK	chr20	11776099	11777230	2	2	2	2	2	2	2	2	2	2	2	2	2	2	2	2	2	2	2	2	2	2	4	4	5	4	4	5	5	4	4	2	2	2	2	2	2	2	2	2	2	3	2	2	2	2
SILK	chr20	11777230	11778230	2	2	2	2	2	2	2	2	3	2	2	1	2	2	2	2	2	2	2	2	2	2	5	4	4	4	3	5	3	4	4	2	2	2	2	3	2	2	2	2	2	2	2	2	2	2
SILK	chr20	11778230	11779268	2	2	2	2	2	2	2	2	2	2	2	2	2	2	2	3	2	2	2	2	2	2	5	5	4	4	5	4	4	4	4	2	2	2	2	1	2	2	1	2	2	2	2	2	2	2
SILK	chr20	11779268	11780268	2	2	2	2	2	2	2	2	3	3	2	3	2	2	2	3	3	3	3	2	2	3	6	6	4	5	4	4	4	5	6	2	3	2	2	1	2	2	2	2	2	2	2	4	2	2
SILK	chr20	11780268	11781268	2	2	2	2	2	2	2	2	3	2	2	2	2	2	2	2	2	3	2	2	1	2	3	4	4	3	4	5	4	3	4	2	2	2	2	3	2	2	2	2	2	2	2	2	2	2
SILK	chr20	11781268	11782309	2	2	2	2	1	2	2	2	2	2	2	2	1	2	2	1	2	2	1	2	1	2	3	4	3	4	5	3	3	4	4	2	2	2	1	2	1	2	1	2	2	2	2	2	2	2
SILK	chr20	11782309	11783309	2	2	2	2	2	3	2	2	2	2	2	2	3	2	2	3	2	2	2	2	2	2	4	4	4	4	4	5	5	4	4	2	2	2	2	2	3	1	2	2	2	2	2	2	2	2
SILK	chr20	11783309	11784309	2	2	2	2	3	3	2	2	2	2	2	2	2	2	1	2	2	2	2	2	2	2	4	4	5	4	6	4	5	4	4	2	2	2	2	2	2	2	2	2	2	2	2	2	2	2
SILK	chr20	11784309	11785309	2	2	2	2	2	2	2	3	2	2	2	2	2	3	2	2	2	3	2	2	2	2	5	4	5	4	5	5	4	5	4	3	2	2	2	2	3	2	3	2	2	2	2	2	2	2
SILK	chr20	11785309	11786309	2	2	2	3	2	2	2	2	2	2	2	2	2	2	2	3	3	2	2	2	2	3	5	5	5	4	5	4	5	6	5	2	2	2	2	3	2	2	2	2	2	2	2	3	2	2
SILK	chr20	11786309	11787309	2	2	2	3	2	2	2	2	1	2	1	1	2	2	2	2	2	2	2	1	2	2	4	4	4	4	4	4	3	4	4	2	2	2	2	2	2	1	1	2	2	2	2	2	2	2
SILK	chr20	11787309	11788411	2	1	2	2	2	1	2	2	2	2	2	1	2	2	1	2	1	1	2	2	2	2	4	4	3	3	3	3	3	3	3	2	2	2	2	1	2	2	1	2	2	2	2	1	2	2
SILK	chr20	11788411	11789411	2	2	2	2	2	2	2	2	2	3	2	2	2	2	3	3	2	2	3	2	2	2	4	4	4	5	7	4	4	4	4	3	3	2	2	2	2	2	2	2	2	2	2	2	2	2
SILK	chr20	11789411	11790411	2	2	2	2	2	2	2	2	3	2	2	2	3	3	3	2	3	2	3	2	2	2	4	4	6	4	6	4	5	4	4	2	2	2	3	2	2	2	3	2	2	2	2	2	2	2
SILK	chr20	11790411	11791411	2	2	2	2	2	3	2	2	2	2	2	2	2	2	1	2	2	2	2	2	2	2	4	4	4	3	3	5	4	4	4	2	2	2	2	2	2	2	2	1	2	2	2	2	2	2
SILK	chr20	11791411	11792411	2	2	3	2	2	2	2	3	2	2	2	2	2	2	2	2	2	1	2	2	2	3	4	3	4	3	4	4	4	4	3	2	2	2	2	2	2	2	2	2	2	2	2	2	2	2
SILK	chr20	11792411	11793411	2	2	3	2	3	2	3	2	2	2	2	2	2	2	2	2	2	2	3	2	2	2	5	4	5	5	5	4	4	4	3	2	2	2	2	2	2	2	1	2	2	1	1	2	2	2
SILK	chr20	11793411	11794411	2	2	2	2	2	2	2	2	1	2	1	2	2	2	2	2	2	2	2	1	3	2	3	3	3	4	4	3	4	4	3	2	2	2	2	2	1	2	2	2	1	2	1	1	2	2
SILK	chr20	11794411	11795411	2	2	2	2	2	2	2	2	2	2	3	2	2	2	2	2	2	2	2	2	3	2	4	3	3	4	4	3	4	4	3	2	2	2	2	2	2	2	2	2	2	2	2	2	2	2
SILK	chr20	11795411	11796507	2	2	2	2	2	2	2	1	2	2	2	1	2	2	2	2	1	2	2	1	2	2	4	3	4	3	4	3	3	3	4	2	2	1	2	2	2	1	2	2	2	2	2	2	2	2
SILK	chr20	11796507	11797507	2	3	2	2	2	3	2	2	2	2	2	2	3	2	2	2	1	2	2	2	2	2	4	4	5	4	6	4	5	4	5	2	2	2	2	2	2	2	2	2	1	2	2	2	2	2
SILK	chr20	11797507	11798507	1	2	1	2	2	1	2	2	2	2	2	2	2	2	2	2	2	2	2	2	2	2	4	4	3	4	4	4	3	4	3	1	2	2	2	2	2	2	2	2	1	2	3	1	1	2
SILK	chr20	11798507	11799547	2	2	2	2	2	2	2	2	1	2	2	1	1	2	2	2	2	1	2	2	2	2	3	3	3	3	5	2	3	3	3	2	2	1	2	2	2	2	2	2	1	1	2	2	1	2
SILK	chr20	11799547	11800547	2	2	1	2	2	2	2	2	2	2	2	2	1	2	2	2	2	2	2	2	2	2	4	4	3	3	4	4	4	4	4	2	2	2	2	2	2	2	1	2	2	2	2	2	2	2
SILK	chr20	11800547	11801547	2	2	2	2	2	2	2	2	2	2	1	2	2	2	2	2	2	1	2	2	2	2	3	4	3	3	3	4	3	4	4	1	2	2	2	2	2	2	2	2	2	2	2	2	2	2
SILK	chr20	11801547	11802547	2	1	1	1	1	2	1	2	2	1	1	1	1	1	1	1	1	1	1	1	2	1	2	2	2	2	3	2	2	3	2	1	1	2	1	1	1	1	1	1	1	2	1	1	2	2
SILK	chr20	11802547	11803547	2	2	2	2	2	2	2	2	2	2	3	3	2	3	2	2	2	3	2	2	2	2	3	3	5	3	5	4	4	4	4	2	2	2	2	2	2	2	2	2	2	2	2	2	2	2
SILK	chr20	11803547	11804547	2	2	2	2	2	2	3	2	1	2	2	2	2	2	2	2	2	2	2	2	2	2	5	4	4	4	6	5	4	4	4	2	2	2	2	2	2	3	2	2	2	2	2	2	2	2
SILK	chr20	11804547	11805547	2	2	2	3	2	3	2	2	2	2	2	2	2	3	2	2	2	2	2	2	2	3	4	5	5	5	4	5	4	4	5	2	2	2	2	2	3	2	3	2	3	2	3	2	2	2
SILK	chr20	11805547	11806580	1	2	2	2	2	2	2	2	2	2	1	1	1	2	1	1	2	1	1	1	2	2	3	3	3	3	3	3	3	3	3	1	1	1	2	1	2	2	2	1	2	2	2	2	2	2
SILK	chr20	11806580	11807580	2	2	2	2	2	2	3	2	2	2	2	2	2	3	2	2	2	2	2	2	2	2	5	4	4	4	4	3	3	4	4	3	2	2	2	2	2	2	2	2	2	2	2	3	2	2
SILK	chr20	11807580	11808580	2	2	2	2	1	2	2	2	2	2	2	2	2	2	2	2	2	1	1	2	2	2	3	4	4	3	4	3	3	3	3	2	2	2	2	2	2	2	2	2	2	1	2	2	2	2
SILK	chr20	11808580	11809580	2	2	2	2	2	2	2	2	2	2	2	2	2	2	2	2	2	2	2	2	2	2	4	3	3	4	5	4	4	4	4	3	2	3	2	2	2	2	2	2	2	3	2	3	2	2
SILK	chr20	11809580	11810580	2	2	2	2	2	2	2	2	2	2	2	2	2	2	2	2	2	2	2	2	2	2	4	4	4	3	5	4	3	4	4	2	2	2	2	1	2	2	2	2	2	2	2	3	2	2
SILK	chr20	11810580	11811631	2	2	2	2	2	1	2	2	2	2	1	2	2	2	2	2	2	2	2	2	2	2	5	4	3	3	4	4	3	3	3	1	2	2	2	2	2	1	2	1	2	2	2	1	2	3
SILK	chr20	11811631	11812631	2	2	2	2	2	2	2	2	2	2	2	2	3	3	2	3	2	3	3	2	2	2	4	5	5	4	6	4	4	4	4	2	2	2	2	2	2	2	3	3	2	2	2	3	2	2
SILK	chr20	11812631	11813631	2	2	2	2	2	2	2	2	2	2	1	1	2	2	1	2	2	2	2	1	2	2	3	3	3	3	3	3	3	3	3	2	2	2	1	2	2	1	2	1	2	2	2	2	2	2
SILK	chr20	11813631	11814670	2	2	2	2	2	2	2	2	2	2	2	2	2	2	1	2	2	2	1	1	2	2	3	3	4	4	4	3	3	3	3	2	2	2	2	2	2	2	1	2	2	2	1	2	2	1
SILK	chr20	11814670	11815670	2	2	2	2	2	2	2	2	2	2	2	2	2	2	2	2	2	2	2	2	2	2	3	4	3	4	5	3	4	4	4	2	2	2	2	2	2	2	2	2	2	2	2	2	2	2
SILK	chr20	11815670	11816670	1	2	1	2	2	2	1	2	2	2	2	2	2	2	1	2	1	2	1	2	2	2	2	3	3	3	4	4	3	3	4	1	2	2	2	2	2	1	1	2	2	2	2	2	2	2
SILK	chr20	11816670	11817670	2	2	2	1	2	2	1	3	1	2	1	1	1	1	1	2	1	2	2	2	2	2	4	4	3	4	4	4	4	3	3	2	2	2	2	2	2	2	2	2	2	2	2	2	2	1
SILK	chr20	11817670	11818670	2	2	2	2	2	2	3	2	2	2	2	2	2	2	2	3	2	2	3	2	2	2	4	4	4	4	5	4	3	4	4	3	2	2	2	2	2	2	1	3	2	2	2	2	2	2
SILK	chr20	11818670	11819709	2	2	2	2	2	2	2	2	2	2	2	2	2	2	1	2	2	1	2	2	2	1	3	3	3	3	4	3	3	3	4	2	1	2	1	2	2	2	1	2	2	2	2	1	2	2
SILK	chr20	11819709	11820709	2	2	2	2	2	2	2	2	2	2	2	2	2	2	2	2	2	2	2	2	1	2	4	4	4	4	4	5	4	4	4	2	2	2	2	2	2	2	2	2	2	2	2	2	2	2
SILK	chr20	11820709	11821709	2	2	2	2	2	2	2	2	2	2	3	2	2	2	2	3	2	2	2	2	2	2	6	5	4	4	4	4	4	5	4	2	2	2	3	2	2	3	2	2	3	2	2	3	2	2
SILK	chr20	11821709	11822869	2	2	2	2	2	2	2	2	2	2	2	2	2	2	2	1	2	2	2	2	2	2	3	3	3	3	3	3	3	2	3	2	2	2	2	2	2	2	2	2	2	2	2	2	2	2
SILK	chr22	132741	133741	2	2	1	2	2	2	2	2	2	3	2	2	2	2	3	3	2	2	2	2	2	2	3	2	3	3	3	3	3	3	3	2	2	2	2	2	2	2	2	2	2	2	2	2	2	3
SILK	chr3	2937117	2938117	2	2	2	2	2	2	2	2	2	2	2	2	3	2	2	3	2	3	3	2	3	3	3	5	6	5	3	4	3	5	4	3	2	3	2	2	2	3	2	2	3	2	2	2	2	2
SILK	chr3	2941309	2942309	2	2	2	3	3	2	2	3	2	2	2	2	2	3	3	2	3	3	3	3	3	3	3	5	7	4	3	4	4	5	4	3	3	2	2	3	3	3	3	3	2	2	2	3	2	2
SILK	chr5	3097208	3098208	3	2	2	2	2	2	2	2	3	2	2	2	2	2	2	2	2	2	2	1	1	2	1	1	1	1	1	0	1	2	1	2	1	2	2	2	2	2	1	2	2	3	3	2	1	3
SILK	chr5	3101666	3103115	1	1	2	2	2	2	2	2	2	2	2	2	2	2	1	2	2	2	2	1	1	2	1	1	1	1	1	0	1	1	0	2	2	2	2	1	2	2	1	2	2	1	2	2	1	2
SILK	chr5	3103115	3104914	1	2	2	2	1	2	2	1	2	2	2	2	2	1	2	1	2	2	2	1	1	2	1	1	1	0	1	0	0	1	0	1	2	1	2	1	1	2	1	1	1	2	1	2	1	2
SILK	chr5	3116604	3117699	2	2	2	2	2	2	1	2	2	2	2	2	2	2	2	2	2	2	2	2	1	2	1	2	1	1	1	0	1	1	1	1	3	2	2	2	2	2	2	3	2	2	2	3	3	2
SILK	chr5	3118699	3119699	2	2	2	3	2	2	2	2	2	2	3	2	2	2	2	2	2	2	3	3	2	2	1	2	1	1	1	0	1	1	1	2	2	2	2	2	2	2	2	2	2	2	3	2	2	2
SILK	chr5	44922318	44923422	2	2	2	1	2	1	2	2	2	2	2	1	2	2	2	2	2	2	2	2	2	2	0	1	1	0	2	1	0	0	0	2	2	2	2	2	2	2	2	2	2	1	2	2	2	2
SILK	chr5	44925119	44926119	2	2	2	2	2	2	2	2	2	2	1	2	2	2	2	2	2	2	2	2	2	2	0	1	1	0	2	1	0	1	0	2	2	2	2	2	2	1	2	2	2	2	2	3	2	2
SILK	chr5	44928182	44929182	2	2	2	2	2	2	3	3	2	2	2	3	3	2	2	3	2	2	3	2	2	2	0	1	1	0	3	1	0	1	0	2	2	2	3	2	2	2	2	2	3	3	2	3	3	3
XH	chr2	102383251	102384251	3	3	3	2	2	2	3	2	3	2	2	2	2	4	4	4	2	4	5	5	4	4	2	2	3	2	2	2	2	2	2	6	6	5	6	5	5	5	5	3	5	4	5	3	4	4
XH	chr6	20466300	20467300	2	2	2	2	2	2	2	2	2	2	2	2	2	2	2	2	2	2	2	2	2	2	2	2	2	2	2	2	2	2	2	2	3	3	2	3	2	3	3	2	2	2	2	2	2	2
YOU	chr1	16981643	16982676	2	1	1	2	1	1	1	2	1	1	1	1	2	2	1	1	1	1	1	1	2	2	1	1	1	2	1	1	2	1	1	1	1	2	2	1	1	1	1	2	2	2	2	2	2	2
YOU	chr1	17590445	17591445	2	2	2	2	2	2	2	3	2	2	2	1	2	2	2	2	2	2	2	1	2	2	2	3	2	2	2	3	2	1	2	2	2	2	2	2	2	2	2	3	3	3	3	4	2	3
YOU	chr1	63928359	63929359	2	2	2	2	2	2	2	2	2	2	2	2	2	2	2	2	2	2	2	2	2	2	2	2	2	2	2	2	2	2	3	2	1	2	2	2	3	2	2	0	2	1	1	1	1	1
YOU	chr11	1058635	1059736	6	5	6	7	6	5	5	5	4	5	6	6	5	6	7	10	7	7	8	8	5	6	6	7	5	6	7	5	5	5	6	9	6	7	5	4	5	4	7	4	4	4	4	4	4	4
YOU	chr12	2358134	2359134	3	2	2	3	3	3	3	2	2	2	3	3	3	3	3	3	3	3	4	3	2	2	2	2	3	3	4	3	3	3	2	3	3	2	3	3	3	3	4	2	2	2	2	2	2	2
YOU	chr15	10978226	10979226	2	2	3	2	2	2	3	3	2	3	3	3	2	3	3	3	3	3	3	3	2	3	2	3	3	3	2	2	3	2	3	3	3	3	2	3	3	3	3	0	2	2	1	2	0	1
YOU	chr27	3587841	3588841	1	2	2	1	1	2	1	2	1	1	1	1	2	1	1	1	1	1	1	1	1	1	2	2	1	1	0	2	1	1	1	1	1	2	2	1	2	1	1	3	3	2	2	3	2	2
YOU	chr27	3588841	3589841	2	2	2	2	2	2	2	1	1	1	2	1	1	1	1	1	1	1	1	1	2	2	1	1	1	1	1	1	2	1	1	1	1	2	2	1	1	1	1	3	3	2	2	3	3	3
YOU	chr27	5071695	5072695	3	3	3	3	3	3	3	2	2	3	3	3	3	3	4	4	3	3	4	3	3	3	3	3	4	3	5	3	3	2	3	3	4	3	3	3	3	3	3	2	2	2	2	3	2	2
YOU	chr28	2094360	2095510	1	2	1	1	1	2	1	2	1	1	1	1	2	1	1	1	1	1	1	1	1	1	1	1	1	1	1	1	2	1	1	1	1	1	2	2	2	1	1	2	2	2	2	2	2	2
YOU	chr4	64566404	64567704	2	2	1	2	2	1	2	2	1	2	2	2	2	2	2	2	2	1	2	2	2	1	2	1	2	1	2	2	2	1	2	1	2	2	2	1	2	2	2	1	1	1	1	1	1	1
YOU	chr4	68648454	68650210	2	2	2	2	2	2	3	2	2	2	1	2	2	2	2	2	2	2	2	3	2	2	2	2	2	2	2	2	3	2	2	2	2	2	2	2	2	2	2	1	1	1	1	1	1	2
YOU	chr4	72130169	72131169	2	2	2	2	2	3	2	1	3	1	1	2	2	2	3	2	2	2	1	2	2	2	2	2	2	2	2	2	2	3	3	2	2	2	2	2	2	2	2	4	3	3	3	4	3	3
YOU	chr5	30432363	30433363	3	2	3	3	3	3	2	2	3	2	2	3	2	3	3	2	2	2	3	2	2	2	2	2	2	1	2	3	2	2	2	2	2	2	2	2	2	2	2	1	1	2	0	1	1	1
YOU	chr5	30435407	30436407	2	2	2	2	3	1	2	2	2	2	2	2	2	2	2	1	2	2	2	2	2	2	3	2	2	2	2	2	2	1	2	2	2	2	3	2	2	2	2	1	1	2	0	1	1	1
YOU	chr5	44086137	44087137	1	2	2	2	2	2	2	2	2	2	2	2	2	2	2	2	2	2	2	2	3	2	2	2	2	2	2	3	2	3	2	2	2	2	2	2	2	2	2	2	1	1	1	1	1	1
YOU	chr8	25590248	25591901	3	2	3	3	3	2	2	3	2	2	3	3	3	3	3	3	3	3	3	3	3	2	2	3	3	3	3	3	3	3	2	3	3	2	2	2	3	3	3	2	2	2	2	2	2	2
YOU	chr9	9919186	9920621	2	2	2	2	2	2	2	2	2	2	2	2	2	2	2	2	2	3	2	2	2	2	2	2	2	2	2	2	2	1	1	2	2	2	2	2	2	2	2	1	1	1	1	1	2	1
WL	chr1	4038669	4039669	3	2	2	3	2	2	3	2	3	4	4	3	3	3	2	2	2	2	3	3	2	2	3	2	3	2	3	1	2	2	2	3	3	2	2	2	2	2	2	3	2	3	3	2	2	2
WL	chr1	11549717	11550717	2	2	2	2	2	2	2	2	1	1	2	1	1	1	3	2	2	2	2	2	2	2	2	3	2	3	2	2	2	2	2	2	2	2	2	2	3	3	2	2	3	2	2	2	2	2
WL	chr1	11553097	11554097	2	2	2	2	2	2	2	2	1	1	2	1	1	1	2	2	2	2	1	2	2	2	2	2	3	2	3	2	2	1	2	2	2	3	2	3	2	2	2	2	2	2	2	2	2	2
WL	chr1	11554097	11555097	2	2	2	2	2	2	2	2	1	1	2	1	1	1	2	3	2	2	1	2	2	2	2	3	2	2	1	2	2	2	2	2	1	2	2	2	2	2	2	2	2	2	2	2	2	2
WL	chr1	20800797	20801797	3	3	2	2	2	2	2	2	5	2	3	3	4	6	3	3	2	2	2	2	2	2	2	2	2	2	2	2	2	2	2	2	2	2	2	3	2	2	2	2	2	2	3	2	2	2
WL	chr1	79480453	79481674	2	2	1	2	2	2	2	2	1	1	1	1	1	1	2	2	2	2	2	2	2	2	2	3	2	2	1	2	2	2	2	2	1	2	2	2	2	2	1	2	2	1	2	1	1	2
WL	chr1	99707311	99708311	2	2	2	2	2	2	2	3	0	0	0	0	1	0	2	2	2	2	2	2	2	2	2	2	2	2	2	2	2	1	1	2	2	2	2	2	2	2	2	1	1	2	1	2	2	2
WL	chr1	99708311	99710031	2	2	1	1	1	2	2	2	0	0	0	0	1	0	1	2	1	1	2	1	2	2	1	2	2	2	1	2	2	1	1	1	2	2	2	1	1	2	1	1	1	2	1	1	2	2
WL	chr1	122453404	122454502	18	21	16	18	16	24	14	16	30	22	30	29	34	33	15	17	20	18	24	16	26	21	12	9	12	13	12	13	14	16	14	9	17	13	16	17	27	23	14	11	20	16	15	16	21	21
WL	chr1	153913683	153914683	5	4	4	3	4	3	4	4	5	5	5	5	5	6	5	4	4	4	4	4	4	4	4	4	5	4	3	4	4	3	3	4	4	4	4	5	5	4	4	5	4	4	4	5	3	4
WL	chr1	157237124	157240687	2	2	2	2	2	2	2	2	1	1	2	2	1	1	2	2	2	2	2	2	2	2	2	2	2	2	2	2	2	2	2	2	2	2	4	2	3	2	2	2	2	2	2	3	2	2
WL	chr1	181745392	181746392	2	2	1	2	2	2	2	2	4	3	3	4	3	3	3	3	2	2	2	2	3	3	2	2	2	2	2	2	2	2	3	2	2	2	3	3	2	2	2	2	3	2	2	2	2	2
WL	chr1	192006931	192008770	3	3	3	2	3	3	2	3	2	2	2	2	2	2	3	2	3	3	3	3	2	2	3	3	4	2	5	3	3	2	4	3	3	3	2	2	3	2	3	3	3	3	3	2	3	2
WL	chr10	12819117	12820296	2	3	2	2	2	3	2	2	2	2	1	0	1	1	2	2	2	3	2	2	2	2	2	2	2	2	3	2	2	3	2	2	3	2	2	2	2	2	3	2	2	2	2	2	2	2
WL	chr10	12825439	12826587	2	2	2	2	2	3	2	2	2	1	1	0	1	1	2	2	2	2	2	2	2	2	2	2	2	2	1	2	2	2	2	2	2	2	2	2	2	1	2	2	2	2	2	2	2	2
WL	chr17	4304516	4305516	2	3	2	2	2	2	2	2	0	0	2	2	0	1	2	2	2	2	3	2	2	2	3	2	2	2	2	2	2	3	2	2	2	2	2	2	2	3	2	2	2	2	2	2	2	2
WL	chr17	8927457	8928457	3	3	2	3	3	3	3	2	2	2	2	2	2	2	3	3	3	3	3	3	3	3	3	4	3	3	3	3	3	3	3	3	3	3	2	3	3	3	3	3	2	3	3	3	3	2
WL	chr2	18138645	18139704	2	2	2	2	2	2	2	2	1	1	1	1	2	1	2	2	2	2	2	2	2	2	2	2	2	2	2	2	2	2	2	2	2	2	2	2	2	2	2	2	2	2	2	2	2	2
WL	chr2	49687455	49688455	10	9	8	11	8	6	8	10	10	10	12	12	11	11	9	7	5	6	9	9	5	6	6	7	5	7	10	6	9	5	6	6	7	8	8	6	5	7	7	4	8	7	7	9	6	6
WL	chr2	49687455	49688455	10	9	8	11	8	6	8	10	10	10	12	12	11	11	9	7	5	6	9	9	5	6	6	7	5	7	10	6	9	5	6	6	7	8	8	6	5	7	7	4	8	7	7	9	6	6
WL	chr2	49688817	49689817	15	18	16	18	14	10	13	15	19	19	34	30	17	18	14	13	7	11	13	16	5	7	9	8	10	9	10	10	9	7	8	11	15	12	15	13	9	12	12	10	11	17	12	17	10	13
WL	chr2	49688817	49689817	15	18	16	18	14	10	13	15	19	19	34	30	17	18	14	13	7	11	13	16	5	7	9	8	10	9	10	10	9	7	8	11	15	12	15	13	9	12	12	10	11	17	12	17	10	13
WL	chr2	49692885	49693924	16	19	13	18	15	10	14	16	23	18	20	21	20	22	14	12	8	11	14	15	7	11	9	11	11	14	9	10	12	9	11	9	10	11	14	12	9	10	11	11	15	17	12	15	12	13
WL	chr2	49692885	49693924	16	19	13	18	15	10	14	16	23	18	20	21	20	22	14	12	8	11	14	15	7	11	9	11	11	14	9	10	12	9	11	9	10	11	14	12	9	10	11	11	15	17	12	15	12	13
WL	chr2	49706819	49708618	13	14	13	15	13	7	12	16	17	18	20	19	17	19	13	10	7	9	13	14	7	10	9	7	10	11	11	9	7	8	8	7	10	11	13	11	8	8	10	9	12	14	9	14	12	9
WL	chr2	49710720	49711759	17	20	13	18	16	10	15	16	24	18	21	21	21	22	15	12	9	12	14	16	8	11	10	11	11	15	9	10	14	9	12	10	12	11	15	13	10	10	12	10	14	17	12	15	13	13
WL	chr2	49713156	49714156	17	21	19	21	17	12	16	20	22	23	40	36	21	21	17	15	10	14	16	18	7	9	11	10	12	12	13	12	11	9	10	14	18	15	18	16	12	14	14	12	13	20	14	19	12	14
WL	chr2	49724465	49725532	14	16	14	16	13	8	12	15	18	18	26	23	18	18	13	11	8	10	13	15	7	9	9	7	10	11	11	10	7	8	8	8	12	12	14	12	9	9	11	11	13	17	10	15	12	11
WL	chr2	76303917	76304994	3	7	7	11	6	7	7	13	18	14	21	20	17	16	14	11	12	13	14	12	11	8	3	4	5	14	12	4	4	4	5	14	6	9	6	7	7	9	15	9	8	22	12	13	9	10
WL	chr2	80306906	80307906	11	7	7	10	7	7	6	6	20	22	31	34	5	30	12	9	4	7	13	7	5	6	8	8	9	7	17	7	9	7	8	8	11	21	18	3	5	6	4	6	11	5	5	6	7	8
WL	chr2	80307906	80308979	5	4	4	5	4	4	4	3	9	11	16	17	4	15	6	5	3	4	6	5	3	4	4	4	5	5	6	5	5	5	5	4	6	10	9	3	4	4	2	4	6	3	4	5	4	4
WL	chr2	111267956	111268956	1	1	2	1	1	1	1	1	0	0	0	0	0	0	2	2	2	1	1	2	2	2	1	2	2	1	2	2	1	0	0	1	1	2	1	1	1	1	0	2	2	2	2	1	1	1
WL	chr2	111268956	111269993	1	1	2	1	1	1	1	1	0	0	0	0	0	0	1	1	1	1	1	2	2	2	1	2	1	1	1	2	1	0	0	0	1	1	1	1	1	1	0	2	2	2	2	1	1	0
WL	chr21	4685113	4686113	2	1	1	2	1	2	2	2	1	1	1	1	1	1	2	2	2	2	1	2	2	2	2	2	2	3	1	2	2	2	2	2	2	2	2	2	2	2	2	2	1	2	1	2	2	2
WL	chr27	904493	906071	2	2	2	2	2	2	2	2	3	2	3	3	2	3	2	1	2	2	2	2	1	1	2	2	1	2	2	1	2	2	2	2	2	2	2	2	2	2	1	1	2	2	2	2	2	1
WL	chr27	906071	907683	2	2	2	2	2	2	2	1	3	2	4	4	3	3	2	2	2	2	2	1	2	1	2	1	2	2	2	2	2	2	2	2	1	2	2	1	2	1	2	2	2	2	2	2	2	2
WL	chr27	907683	909170	2	2	2	2	2	2	2	2	4	3	4	4	3	4	2	1	2	1	2	2	2	1	2	2	1	2	2	2	1	1	2	2	2	2	2	1	2	2	2	2	2	2	2	2	2	2
WL	chr28	2649346	2650346	2	2	2	2	2	2	2	2	1	2	1	2	1	1	3	3	3	3	2	3	2	2	2	2	2	3	3	2	3	2	2	2	2	2	2	3	2	2	2	2	2	2	2	2	2	2
WL	chr3	44070499	44071499	1	2	1	2	1	2	1	3	0	0	1	1	0	0	2	2	2	2	2	2	3	2	2	3	2	3	2	1	1	2	2	1	1	2	2	1	2	2	2	2	2	2	2	3	1	1
WL	chr3	44071499	44072499	2	2	1	2	2	2	1	2	0	0	1	1	0	0	2	2	2	2	2	2	2	2	2	3	2	3	2	2	2	2	2	1	1	2	2	1	2	2	2	3	3	2	2	3	1	1
WL	chr3	76624488	76625892	2	2	3	2	2	3	2	2	1	1	1	1	1	1	1	2	2	2	1	2	2	2	2	2	2	2	1	2	2	2	2	1	2	2	2	2	2	2	1	2	1	1	2	2	1	2
WL	chr3	88980647	88981647	2	2	2	2	2	3	2	2	1	1	1	1	1	1	1	2	2	2	2	1	2	2	2	1	2	2	2	2	2	2	2	2	2	2	2	2	2	2	2	3	2	2	2	3	1	3
WL	chr3	92225659	92226659	3	2	2	2	2	3	2	3	0	0	1	2	0	0	2	2	2	2	2	2	1	2	2	3	2	2	2	2	2	2	3	2	2	1	3	2	2	2	2	3	3	2	2	2	1	2
WL	chr3	92226659	92227659	2	1	2	2	1	2	2	2	0	0	1	2	0	0	2	2	2	2	2	2	1	2	2	2	2	3	2	2	2	2	2	2	2	1	3	2	1	2	1	2	2	2	3	2	1	2
WL	chr3	97774999	97776853	2	3	2	2	2	2	2	1	2	1	1	1	1	0	2	2	2	2	2	2	2	2	2	2	2	2	2	2	2	2	2	2	2	2	2	2	2	2	2	2	3	2	3	2	2	2
WL	chr3	97776853	97777853	2	2	2	2	2	2	2	2	2	1	1	1	1	0	2	2	3	2	2	2	1	2	2	2	2	2	2	2	2	3	2	2	2	2	2	2	2	2	3	2	2	3	2	2	2	2
WL	chr4	24169941	24170980	1	2	2	2	1	1	2	2	1	1	1	1	0	1	2	2	2	2	2	1	2	2	2	2	2	2	2	2	2	2	2	2	1	2	2	2	2	1	1	2	1	1	2	2	2	2
WL	chr4	24271750	24272796	2	2	2	2	2	1	2	2	3	4	4	4	2	2	2	1	2	2	2	2	2	2	1	2	2	2	2	1	2	2	2	2	2	2	2	2	2	1	2	2	2	2	1	1	2	2
WL	chr4	24273796	24274827	2	2	2	2	2	2	2	2	3	5	4	3	2	2	2	2	2	2	2	2	2	2	2	2	1	1	2	1	1	2	2	1	1	2	2	2	1	2	2	2	2	2	2	2	2	2
WL	chr4	24274827	24275827	2	2	3	3	2	3	2	2	4	5	6	5	3	3	2	3	2	2	2	2	2	2	2	2	1	2	3	2	2	2	2	2	2	3	2	2	3	2	2	2	3	2	3	2	2	2
WL	chr4	24276861	24277861	2	2	1	2	1	2	2	2	3	4	3	3	2	2	1	1	2	2	1	1	2	2	1	2	1	2	2	2	2	2	2	1	2	2	1	1	2	2	2	1	2	2	1	1	2	2
WL	chr4	24282008	24283067	2	2	2	1	2	2	2	2	3	4	3	4	2	2	2	2	2	2	2	2	1	2	2	2	2	2	2	1	2	2	1	2	2	2	2	2	1	2	2	2	2	2	2	2	1	2
WL	chr4	24283067	24284067	2	2	1	2	2	1	2	1	3	3	3	3	2	2	2	2	2	2	2	1	2	1	2	2	2	2	2	2	2	2	2	2	2	1	2	2	2	2	2	1	2	2	2	2	2	2
WL	chr4	85944486	85945552	2	2	2	1	2	2	2	2	1	0	2	1	1	1	2	2	2	2	2	2	2	2	2	2	2	2	2	2	2	2	1	2	2	2	2	2	2	2	2	2	2	2	2	2	2	2
WL	chr4	85945552	85946552	2	2	2	2	2	2	3	2	1	0	2	1	1	1	2	2	2	2	2	2	3	2	2	3	3	2	2	2	3	2	3	2	2	2	2	2	2	2	2	3	2	3	2	2	2	3
WL	chr4	85946552	85948010	2	2	3	2	1	2	2	2	1	0	2	1	1	1	2	2	2	2	2	2	2	2	2	3	2	2	2	2	1	2	2	2	2	2	2	2	2	2	1	2	2	2	2	2	2	2
WL	chr4	85948010	85949010	3	2	2	3	3	3	3	3	1	0	2	1	1	1	2	2	2	2	2	3	3	2	3	3	2	2	3	2	2	2	2	2	2	3	2	2	2	2	1	3	3	2	2	3	3	2
WL	chr4	85957461	85958461	2	2	2	3	2	2	3	2	1	0	2	1	1	1	2	2	3	2	3	2	2	2	2	2	2	2	2	2	2	2	3	3	3	2	3	2	2	2	3	2	2	2	2	3	3	2
WL	chr4	85958461	85959461	3	3	4	3	3	3	3	3	1	0	2	1	1	1	2	2	3	2	2	3	2	2	2	3	2	2	2	2	2	2	2	2	2	2	3	2	3	3	3	3	2	3	3	3	2	2
WL	chr4	85959461	85960461	3	2	3	2	2	3	3	2	1	0	2	1	1	1	2	2	2	2	2	2	2	1	2	2	2	2	2	2	3	2	2	2	2	2	2	3	3	2	2	2	2	3	2	2	2	2
WL	chr4	85960461	85961461	3	3	3	2	2	2	2	1	1	0	2	1	1	1	2	2	2	2	2	2	2	2	2	2	2	2	2	2	2	2	2	2	2	2	3	2	2	2	2	3	3	2	3	3	2	3
WL	chr4	85961461	85963739	1	1	1	1	1	1	1	1	0	0	1	0	0	0	1	1	1	1	1	1	1	1	1	1	1	1	2	1	1	1	1	1	1	1	1	1	1	1	1	1	1	1	1	1	1	1
WL	chr4	85966818	85968108	2	2	2	2	2	2	2	2	1	0	2	1	1	1	2	2	2	2	3	2	2	2	2	2	2	2	3	1	2	2	2	1	2	2	2	2	2	2	2	2	2	2	1	2	2	2
WL	chr4	85968108	85969317	2	2	3	2	3	2	2	2	1	0	2	1	1	1	1	2	2	2	2	2	2	2	2	2	2	2	2	2	2	2	2	2	2	2	2	2	2	2	2	2	2	2	1	3	2	2
WL	chr4	85973668	85974668	2	2	2	2	2	2	2	2	1	0	2	1	1	1	2	2	1	2	2	2	2	2	2	2	2	1	2	2	2	2	2	2	2	2	2	2	2	2	2	2	2	2	2	2	2	2
WL	chr4	85976668	85977668	2	2	2	2	2	2	2	2	1	0	2	1	1	1	2	2	2	2	2	2	2	2	2	2	3	1	2	2	2	2	2	2	2	2	2	2	3	2	2	3	2	1	2	2	2	3
WL	chr4	85977668	85978897	2	2	2	2	2	2	2	2	1	0	2	1	1	1	2	2	2	1	2	2	2	2	2	2	2	2	2	2	2	2	3	2	2	2	2	2	2	2	2	3	3	2	3	2	2	3
WL	chr4	85978897	85979897	2	3	3	3	3	3	2	2	1	0	2	1	1	1	2	3	2	2	2	2	2	2	2	2	2	2	3	2	2	2	2	2	3	2	3	2	2	2	2	3	3	3	2	3	3	2
WL	chr4	85979897	85981141	2	3	2	2	2	1	3	2	1	0	2	1	1	1	2	2	2	2	2	2	2	2	2	2	2	2	3	2	2	2	1	2	2	2	3	2	2	2	2	2	2	2	2	1	2	2
WL	chr4	85981141	85982141	2	2	3	2	2	2	2	2	1	0	2	1	1	0	3	2	2	2	2	2	2	2	2	2	3	2	3	2	3	2	2	2	2	2	2	2	2	2	2	2	2	2	2	3	2	3
WL	chr4	85982141	85983173	2	1	2	2	2	2	2	2	1	0	2	1	1	1	2	2	2	2	2	2	2	2	2	2	2	2	2	1	2	2	2	2	2	2	2	2	2	2	2	2	1	2	2	2	2	2
WL	chr4	85987444	85990179	2	2	2	2	2	2	2	2	1	0	2	1	1	1	2	2	2	2	2	2	2	2	3	2	2	3	2	2	2	1	2	2	2	2	2	2	2	2	2	2	2	2	2	2	2	2
WL	chr5	38621532	38622532	3	2	3	2	3	3	3	2	2	2	2	2	2	2	3	3	3	3	3	3	3	3	3	3	3	3	2	3	2	3	3	3	3	3	2	3	3	2	3	2	3	3	2	2	3	3
WL	chr5	46059666	46060666	2	2	2	2	1	2	2	2	1	1	0	1	0	1	2	2	2	2	2	2	1	2	2	3	2	3	2	2	2	2	2	2	2	2	2	2	2	2	2	1	2	2	1	2	2	2
WL	chr5	46060666	46061666	1	1	1	2	1	1	2	2	0	1	0	1	0	1	2	1	1	2	2	1	2	2	2	2	1	2	1	2	2	2	1	2	1	2	1	2	1	2	1	1	2	2	1	2	1	2
WL	chr5	46062920	46063920	3	2	3	3	1	3	2	2	1	1	0	1	0	1	2	1	3	2	2	2	2	2	2	1	2	2	2	2	3	2	2	2	2	2	2	2	2	2	2	1	2	2	1	2	2	2
WL	chr5	55179331	55180331	3	3	2	2	3	3	3	2	5	5	4	4	4	4	4	3	2	4	3	4	3	2	3	2	3	2	2	3	2	3	2	4	3	4	3	4	4	3	3	2	3	4	4	3	3	3
WL	chr6	3211644	3212831	24	24	25	29	15	18	25	14	29	28	31	29	29	28	21	18	19	21	22	22	18	20	19	15	24	19	25	13	19	22	22	19	12	24	16	19	18	11	15	29	18	25	25	14	24	25
WL	chr8	9613257	9614327	2	2	3	2	3	2	3	2	3	3	3	3	3	3	2	2	2	2	2	2	2	2	2	2	2	2	2	2	2	2	2	2	3	2	2	2	3	3	2	2	2	2	3	3	2	3
WL	chr9	3427268	3428268	2	2	2	2	2	2	2	2	3	3	4	4	3	3	2	2	2	2	2	2	2	4	2	2	2	2	1	2	2	2	2	2	2	2	2	2	2	2	2	2	2	1	2	3	2	2
WL	chr9	3429367	3430494	2	1	2	2	2	2	2	1	3	3	3	3	3	2	2	1	2	2	2	1	1	3	2	2	2	2	1	2	2	2	2	2	1	1	1	2	2	1	1	2	3	2	2	2	2	2
WL	chr9	3430494	3431644	2	1	2	2	2	2	1	2	3	3	4	4	3	3	2	2	2	2	2	1	2	3	2	2	2	2	1	2	2	2	2	1	2	2	2	2	2	2	1	2	2	2	2	2	2	2
WL	chr9	3433901	3434901	2	2	2	2	2	2	2	2	3	3	4	4	4	3	3	2	3	2	3	2	2	3	2	2	2	2	2	2	2	2	2	1	2	2	2	2	2	2	2	2	3	2	2	2	2	2
WL	chr9	3435901	3436901	2	2	2	2	2	2	2	2	4	3	4	3	4	3	3	2	2	2	3	2	2	3	2	3	2	2	3	2	2	2	2	2	2	2	2	2	2	2	2	2	3	2	2	3	2	2
WL	chr9	3439932	3440932	2	2	2	2	2	3	2	2	3	4	4	5	3	4	3	2	3	2	3	2	2	4	2	2	2	2	3	2	2	2	2	2	1	2	2	2	2	2	1	2	3	2	2	2	3	2
WL	chr9	3445932	3446932	2	2	2	3	2	2	2	2	3	3	4	4	4	3	2	2	2	2	3	2	2	3	2	2	2	2	2	2	2	3	3	2	2	2	2	2	2	2	2	2	3	2	2	2	2	2
WL	chr9	3446932	3447932	2	2	2	2	2	1	2	2	3	3	3	3	3	3	3	2	2	2	3	2	2	3	2	1	2	1	2	2	2	2	2	2	2	2	2	2	2	2	2	2	3	2	2	2	2	2
WL	chr9	3447932	3448976	2	2	2	2	2	1	2	2	3	3	3	3	2	4	2	1	2	1	1	1	2	2	1	2	2	1	2	2	2	2	2	1	2	2	2	1	1	2	1	2	2	2	2	2	2	1
WL	chr9	3449976	3451042	2	2	2	2	2	2	1	2	3	3	4	3	3	3	1	1	2	1	2	1	2	3	1	2	1	2	1	2	2	2	2	2	2	2	2	2	2	1	1	2	2	2	2	2	2	2
WL	chr9	3452166	3453166	2	2	2	2	2	2	2	2	3	3	4	3	3	4	2	2	2	2	3	2	2	3	2	2	2	2	3	2	2	2	2	2	2	2	2	2	2	2	1	2	3	2	2	1	2	2
WL	chr9	3453166	3454166	2	3	2	2	2	2	2	3	4	4	5	5	4	3	3	2	3	2	4	2	2	4	2	2	2	2	3	2	2	2	2	2	2	2	2	3	2	3	2	2	3	2	3	2	2	3
WL	chr9	3459411	3460411	2	2	2	2	2	2	2	2	3	3	4	5	3	3	2	2	2	1	2	2	2	4	2	2	2	2	4	2	2	2	2	1	2	2	2	2	2	2	2	2	3	2	2	2	2	2
WL	chr9	3460411	3461411	2	2	2	2	2	2	2	2	4	3	4	5	3	4	3	2	3	2	3	2	2	4	2	2	2	2	2	2	2	2	2	2	2	2	2	2	2	3	2	2	3	2	2	2	2	2
WL	chr9	3462411	3463411	2	2	2	2	2	2	2	2	3	3	4	4	3	3	2	2	2	1	2	1	2	4	2	2	2	1	1	2	2	2	2	2	2	2	2	2	2	2	2	2	2	2	2	2	2	2
WL	chr9	3463411	3464411	2	2	2	2	2	2	2	2	3	4	5	5	3	4	3	2	2	2	3	2	2	4	2	2	2	1	3	2	2	2	2	2	2	2	2	2	2	2	2	2	3	2	2	2	2	2
WL	chr9	3466411	3467814	2	2	2	2	2	2	2	2	3	3	4	4	3	3	2	2	2	2	2	2	2	2	1	1	2	2	2	2	2	2	2	2	2	2	2	2	1	2	2	2	2	1	2	2	2	2
WL	chr9	17813782	17814782	2	3	3	2	2	3	3	2	1	1	1	2	2	1	3	3	2	3	3	3	2	3	3	2	2	3	2	2	2	2	2	2	3	3	2	3	2	3	3	3	3	3	2	3	2	2
WL	chr9	17814782	17815782	2	2	2	2	2	3	3	2	0	0	0	2	1	0	2	2	2	3	2	2	2	3	2	2	2	2	2	2	2	2	3	2	2	2	2	2	2	2	2	2	3	2	3	2	3	2
WL	chr9	17815782	17816782	2	2	2	2	2	2	3	2	0	0	0	3	1	0	2	2	2	2	2	2	2	2	2	2	2	2	2	2	2	2	2	2	2	2	2	2	2	3	2	2	3	3	3	3	3	3
WL	chr9	17816782	17817782	3	2	3	2	2	3	3	2	0	0	0	3	1	0	2	3	2	3	2	3	2	2	3	3	3	2	2	2	2	3	2	3	2	3	2	2	3	3	3	3	3	2	2	3	3	2
RW	chr1	48919472	48920964	2	2	1	2	2	1	1	2	2	2	1	2	2	2	3	3	3	2	3	3	2	2	2	2	2	2	2	2	2	2	2	2	2	2	2	2	2	2	2	1	2	2	2	1	1	2
RW	chr1	49459765	49460765	2	2	1	2	2	2	2	2	2	2	2	2	2	2	3	3	3	3	3	3	3	3	2	2	3	3	2	2	2	2	2	2	2	2	2	2	3	3	3	2	2	2	2	1	3	2
RW	chr1	61987177	61988177	2	2	2	2	2	2	2	3	3	2	2	2	2	2	3	3	3	3	3	3	3	3	2	3	2	2	3	2	2	2	2	3	2	2	2	2	2	2	2	2	2	3	2	2	2	2
RW	chr1	62272395	62274012	2	2	3	2	2	2	2	2	1	2	2	2	2	1	3	3	3	3	3	3	3	3	2	2	2	2	2	2	2	2	2	2	2	2	2	2	2	2	2	2	2	2	2	2	2	2
RW	chr1	62274012	62275275	3	3	4	3	3	4	4	3	2	2	3	3	2	3	5	6	5	4	6	5	5	4	4	3	3	3	2	3	3	3	3	3	3	3	3	3	4	3	2	3	3	3	3	3	3	4
RW	chr1	62275275	62276275	3	3	4	4	4	4	5	4	4	3	3	4	2	3	7	7	4	6	7	6	6	4	5	4	4	4	3	4	4	4	4	4	3	4	3	5	3	4	4	4	3	4	3	4	3	4
RW	chr1	62277275	62278275	3	2	3	4	3	3	3	2	2	2	2	3	2	2	4	6	4	3	5	5	5	4	3	3	2	3	2	3	2	3	3	3	2	2	2	3	3	2	3	2	2	3	2	3	3	3
RW	chr1	62283291	62284569	2	1	2	3	4	3	3	2	2	2	2	4	2	2	5	7	4	4	5	5	6	3	2	4	2	4	3	3	2	3	2	2	2	2	2	3	2	2	2	3	2	3	2	2	2	2
RW	chr1	62285569	62286698	3	2	3	4	5	3	4	3	4	2	3	5	4	3	5	6	5	5	5	5	6	4	3	4	4	4	4	5	4	4	4	4	3	3	5	5	4	4	4	4	3	4	3	3	4	3
RW	chr1	120331411	120333235	5	3	4	3	4	3	4	3	3	3	3	3	3	3	3	2	3	2	2	3	2	2	3	4	3	4	3	4	4	3	3	3	3	3	3	3	3	3	4	3	3	4	3	3	3	4
RW	chr1	121206567	121207567	2	2	1	2	2	2	2	2	2	1	2	1	2	1	3	4	4	2	3	3	4	3	2	3	2	3	2	2	2	1	2	2	2	2	2	2	2	2	2	3	2	2	2	2	2	1
RW	chr1	121207567	121209176	2	2	2	2	2	2	2	2	2	2	2	2	2	2	4	4	4	3	3	3	4	3	2	2	2	2	3	2	3	2	2	2	2	2	2	2	2	2	2	2	2	2	2	2	2	2
RW	chr1	121209176	121210176	1	1	1	1	2	2	2	2	1	2	1	2	2	2	3	4	4	3	2	3	4	3	2	1	2	2	2	2	2	2	2	1	2	2	3	1	2	2	2	2	2	2	2	2	2	2
RW	chr1	121210176	121211176	3	2	2	2	3	3	2	2	2	2	2	3	2	2	4	5	4	3	3	3	5	3	2	2	2	3	3	2	2	2	2	2	3	2	2	2	2	2	3	2	2	2	3	2	2	3
RW	chr1	121211176	121212229	2	1	1	2	1	2	1	2	2	2	2	2	1	2	3	4	3	3	2	3	4	3	2	2	3	2	2	2	2	3	2	2	2	2	2	2	2	2	2	1	1	2	2	2	1	1
RW	chr1	121212229	121213388	1	2	2	2	2	2	2	1	1	2	2	2	2	2	3	4	4	3	2	3	4	3	2	2	2	2	2	2	2	2	1	1	2	2	1	2	2	2	2	2	2	2	2	2	2	2
RW	chr1	121213388	121214388	2	2	2	2	2	2	2	2	2	2	2	2	2	2	3	4	4	3	3	3	4	3	2	1	2	3	3	2	2	2	2	2	2	2	2	2	2	2	2	2	2	2	2	2	2	2
RW	chr1	121214388	121215388	2	2	2	2	2	2	2	2	2	2	2	2	2	2	3	5	3	3	3	3	4	3	2	1	2	2	2	2	2	2	2	2	2	2	2	1	2	2	2	3	2	1	2	2	2	2
RW	chr11	1118781	1119781	2	2	1	2	2	2	2	2	2	2	2	2	1	2	3	3	3	3	2	3	3	3	3	2	3	2	2	2	2	2	2	2	2	3	2	2	2	2	2	2	2	2	2	2	2	2
RW	chr11	13054754	13055754	2	2	3	2	2	2	2	2	2	2	2	2	2	2	1	1	1	1	1	1	2	2	2	2	2	1	2	3	3	3	2	2	2	2	2	2	2	2	2	2	2	3	3	2	3	2
RW	chr11	13055754	13056754	2	2	2	2	3	2	2	2	2	2	2	2	2	2	0	1	1	1	1	0	2	2	3	2	2	2	2	2	2	2	2	2	2	3	2	2	2	2	2	3	2	3	2	3	2	3
RW	chr11	13057786	13058786	2	2	2	2	2	2	2	2	2	3	2	2	2	2	0	1	1	1	1	0	2	2	2	2	1	2	2	2	3	2	2	2	2	2	2	3	2	2	2	2	2	2	2	2	2	2
RW	chr11	13059863	13060863	2	2	2	2	3	3	1	2	2	2	2	2	3	2	0	1	1	1	1	0	2	2	2	3	2	2	2	2	2	2	2	3	2	2	1	2	2	3	2	3	3	2	2	2	2	2
RW	chr11	13060863	13061863	3	3	3	3	3	3	3	2	3	3	3	3	2	2	0	2	1	1	2	0	2	2	3	3	2	2	2	2	3	3	2	2	3	2	3	3	3	3	2	3	3	3	3	3	2	2
RW	chr12	2085971	2086971	1	2	1	2	2	1	1	2	1	1	1	2	1	2	3	3	2	4	4	3	3	2	2	1	2	1	2	1	2	2	2	2	2	1	2	1	1	2	2	2	2	1	2	2	1	2
RW	chr12	2305939	2306939	8	9	11	12	13	8	9	7	9	10	12	12	11	14	14	13	15	11	16	17	15	16	7	11	10	7	9	7	6	8	9	13	16	7	8	6	8	7	10	9	8	9	12	13	9	8
RW	chr12	2309939	2312107	8	9	11	13	11	6	7	5	6	8	9	10	8	11	16	16	9	12	16	19	12	13	7	11	9	6	12	8	7	7	8	12	14	9	7	5	10	7	11	9	7	8	11	11	8	9
RW	chr12	2331024	2332024	8	10	10	11	10	7	9	8	7	11	10	11	12	13	14	14	13	12	15	18	16	12	7	11	10	9	8	6	8	8	10	12	17	7	8	6	8	8	8	8	7	9	10	12	9	7
RW	chr12	2338497	2340007	7	9	10	10	12	8	8	8	8	10	11	11	12	13	13	13	14	11	15	17	16	13	6	10	9	8	8	7	7	8	9	12	17	7	8	5	9	8	8	7	7	8	8	12	8	7
RW	chr12	2736533	2738154	14	18	16	20	17	11	15	20	9	15	15	18	21	22	30	30	18	24	31	38	28	17	13	18	18	16	20	12	15	15	18	18	27	14	16	8	15	16	14	12	13	14	13	22	16	11
RW	chr12	3236972	3237972	14	19	18	19	24	14	13	9	14	20	21	18	20	28	32	30	23	28	40	42	27	27	13	22	15	13	22	12	13	15	14	23	33	21	14	11	19	17	21	12	12	13	15	17	11	14
RW	chr12	3238972	3240094	13	19	14	17	23	13	9	16	7	14	13	12	15	21	34	32	16	25	39	43	22	20	10	20	12	9	32	9	12	11	12	15	24	16	14	9	17	16	20	9	9	10	13	16	9	12
RW	chr12	3240094	3241094	15	22	16	21	29	17	12	17	11	17	17	15	23	27	39	33	19	29	45	48	35	25	14	23	19	13	22	13	16	17	18	18	29	21	16	11	21	20	21	13	13	14	17	26	15	14
RW	chr12	5110226	5111226	16	23	17	25	37	22	13	23	12	19	18	17	24	27	39	34	20	33	46	51	42	29	17	25	18	13	32	14	18	19	19	18	30	23	16	12	23	22	24	15	14	15	20	28	16	17
RW	chr12	5111226	5112312	11	17	12	18	27	14	9	12	8	12	12	10	15	20	31	28	14	21	36	39	25	18	10	19	13	8	23	10	12	13	13	13	21	15	12	10	18	18	19	10	9	10	13	19	10	13
RW	chr12	5113312	5114312	18	22	20	21	27	16	15	14	12	21	20	19	23	31	39	36	25	34	48	51	32	28	16	24	19	16	28	13	15	18	18	26	36	23	17	12	20	20	24	14	13	16	17	22	14	16
RW	chr13	9392162	9393162	2	2	2	2	2	2	2	2	2	3	2	2	2	2	3	3	3	3	3	2	3	3	2	2	2	2	3	3	2	2	2	2	2	2	2	3	2	2	2	2	2	2	2	2	2	2
RW	chr14	12298846	12299846	2	2	2	2	2	2	2	2	2	2	2	2	2	3	3	3	3	3	3	3	2	3	2	2	2	2	2	2	2	2	2	2	2	2	2	2	2	2	2	2	2	2	2	2	2	2
RW	chr14	12353239	12354239	2	2	2	2	2	2	2	2	2	2	2	3	3	2	3	3	3	3	3	3	3	3	2	2	3	2	3	2	3	2	2	3	3	2	2	2	2	2	3	2	2	2	2	2	2	2
RW	chr14	12606187	12607187	2	2	1	2	2	2	2	2	1	2	2	1	2	2	3	3	3	2	3	3	3	2	2	2	2	2	2	3	2	2	2	2	2	2	2	2	2	2	2	2	2	2	2	2	2	2
RW	chr15	585451	586451	2	2	2	2	2	2	2	2	2	2	2	2	2	3	3	3	3	3	4	3	3	3	3	2	2	3	3	2	2	2	2	3	2	3	2	2	2	3	2	2	2	2	2	2	2	1
RW	chr15	6242673	6243673	2	2	2	1	2	2	2	2	2	2	2	2	2	2	3	3	3	3	3	3	3	3	3	2	2	2	3	2	2	2	3	2	3	2	2	2	2	2	3	2	1	2	2	2	2	2
RW	chr17	5232275	5233275	2	2	2	2	3	2	2	2	2	2	2	3	2	2	3	3	3	4	3	3	3	2	2	3	2	3	2	2	2	2	2	2	2	2	2	2	2	2	3	2	2	2	2	3	2	2
RW	chr17	8385363	8386363	2	2	3	2	2	2	2	2	2	3	2	2	2	3	3	3	3	3	3	3	3	3	3	2	2	2	3	3	2	2	2	3	2	2	2	3	2	2	3	2	2	2	2	1	1	2
RW	chr17	9540025	9541025	2	2	2	2	2	2	2	2	2	2	2	2	2	3	3	3	3	3	3	3	3	3	2	3	3	2	3	2	2	2	2	3	3	2	2	3	2	2	2	2	2	2	2	3	2	3
RW	chr18	612537	615029	1	2	1	1	1	2	2	2	1	1	2	1	1	2	3	3	3	3	3	3	4	2	2	2	2	2	2	1	2	1	2	2	2	2	1	2	1	3	2	1	2	2	2	2	1	2
RW	chr18	6714811	6715811	2	3	2	2	3	2	2	3	2	2	2	3	2	3	3	3	3	3	4	3	3	3	2	2	2	2	3	2	3	2	3	3	2	2	2	2	3	2	3	3	2	2	2	2	2	2
RW	chr19	5062812	5063917	2	2	2	2	2	2	2	2	2	2	2	2	2	2	3	3	3	3	3	3	3	2	3	2	2	2	2	2	2	2	2	2	3	2	2	2	2	2	2	2	2	2	2	2	2	2
RW	chr19	5397545	5398545	2	2	2	2	2	2	2	2	2	2	3	3	2	2	3	3	3	3	3	4	3	3	2	3	3	2	3	2	2	2	2	2	3	2	2	2	2	3	3	2	2	2	2	2	2	3
RW	chr2	14061756	14062756	2	2	2	2	2	2	2	2	2	2	2	2	2	2	3	3	2	3	3	3	3	3	2	3	3	2	2	2	2	2	2	2	2	2	2	3	2	2	2	2	2	2	2	3	2	2
RW	chr2	14061756	14062756	2	2	2	2	2	2	2	2	2	2	2	2	2	2	3	3	2	3	3	3	3	3	2	3	3	2	2	2	2	2	2	2	2	2	2	3	2	2	2	2	2	2	2	3	2	2
RW	chr2	32808542	32809542	2	2	2	2	2	2	2	1	2	2	2	1	2	2	1	1	1	1	1	1	2	1	2	2	2	2	1	2	2	2	2	1	2	2	2	2	2	2	2	2	2	2	2	2	2	2
RW	chr2	32808542	32809542	2	2	2	2	2	2	2	1	2	2	2	1	2	2	1	1	1	1	1	1	2	1	2	2	2	2	1	2	2	2	2	1	2	2	2	2	2	2	2	2	2	2	2	2	2	2
RW	chr2	100981545	100982545	3	3	2	2	2	2	4	2	2	3	2	3	4	2	2	0	0	0	0	1	1	1	2	2	2	2	2	2	2	2	2	2	2	2	2	2	2	2	2	2	2	2	2	2	2	1
RW	chr2	100982545	100983545	3	4	2	3	3	3	4	2	3	2	2	2	3	3	1	0	0	0	0	1	2	1	2	3	2	3	2	3	3	3	3	2	2	2	2	2	2	2	2	2	2	2	2	2	2	1
RW	chr2	100983545	100984545	2	3	1	2	2	2	3	3	2	2	2	2	4	2	1	0	0	0	0	1	2	1	2	2	2	2	2	3	2	2	2	2	2	2	2	2	2	2	2	2	2	2	2	2	2	1
RW	chr20	800880	801880	2	2	2	2	2	2	2	2	2	2	2	2	2	2	2	3	3	3	2	3	3	3	2	2	2	2	2	2	2	2	2	2	2	2	2	2	2	2	2	2	2	2	2	2	2	2
RW	chr20	1803013	1804013	3	3	2	2	2	2	2	2	2	2	3	2	3	2	3	3	3	3	3	3	3	3	2	3	2	2	3	3	2	2	2	3	2	2	2	2	3	2	2	2	2	3	3	2	2	2
RW	chr20	1803013	1804013	3	3	2	2	2	2	2	2	2	2	3	2	3	2	3	3	3	3	3	3	3	3	2	3	2	2	3	3	2	2	2	3	2	2	2	2	3	2	2	2	2	3	3	2	2	2
RW	chr20	10891880	10892880	2	2	2	2	2	2	2	3	2	2	2	2	2	2	3	3	3	3	3	3	3	3	3	2	3	2	2	2	2	2	2	2	3	2	2	3	2	2	3	2	2	2	2	2	2	2
RW	chr21	83814	84852	2	2	3	2	2	2	2	2	2	2	2	2	2	2	1	1	1	1	1	1	1	1	1	2	2	1	2	1	2	2	2	1	1	2	2	2	2	2	1	2	2	2	2	1	2	2
RW	chr21	2090403	2091403	2	2	2	2	3	3	2	2	2	2	2	2	2	2	3	3	3	3	3	3	3	3	2	2	3	2	3	2	2	2	3	3	2	2	2	2	2	3	3	2	2	3	2	2	2	2
RW	chr26	5265050	5266050	3	2	2	3	3	2	2	3	2	2	2	2	2	2	4	4	3	3	3	3	4	3	2	2	2	3	3	2	2	2	2	2	3	2	2	2	2	2	2	2	2	3	2	2	2	2
RW	chr26	5266050	5267050	2	2	2	2	2	2	2	2	2	2	3	3	2	2	3	4	3	3	3	4	4	3	3	3	2	3	3	2	2	2	2	2	2	2	2	2	2	3	2	2	3	2	2	2	2	2
RW	chr26	5269050	5270050	2	2	2	3	2	2	2	2	2	2	2	2	2	2	3	4	2	4	3	4	3	2	2	2	2	2	3	2	2	2	2	1	2	1	2	2	2	2	2	2	2	2	2	2	2	2
RW	chr26	5270050	5271050	2	2	2	2	2	2	2	2	2	1	2	2	3	2	3	3	2	3	3	3	4	3	2	2	3	2	2	2	2	2	2	2	2	2	2	2	2	2	2	2	2	2	2	2	2	2
RW	chr26	5271050	5272136	2	2	2	2	2	2	2	2	2	2	2	2	2	2	3	2	2	3	3	2	3	3	2	2	2	1	2	2	2	2	2	2	2	2	2	2	2	2	1	2	2	2	2	2	2	2
RW	chr26	5275175	5276175	2	2	2	3	2	2	2	2	2	2	2	3	2	2	4	4	2	4	3	4	4	3	3	2	2	2	4	2	2	2	2	2	3	2	2	2	2	2	3	2	2	2	2	3	2	2
RW	chr26	5279424	5280424	2	2	2	2	3	2	2	2	2	2	2	2	2	2	4	4	2	4	3	3	4	3	2	2	2	2	2	2	2	2	2	2	3	2	2	2	2	3	2	2	2	2	2	3	2	2
RW	chr27	155978	156978	2	3	2	2	3	4	4	2	5	3	3	3	4	3	0	0	3	2	2	0	0	0	2	5	5	3	6	4	4	3	3	2	2	3	3	4	3	3	3	3	6	5	4	5	4	5
RW	chr28	2600541	2601541	2	2	1	2	2	2	2	2	2	2	2	2	2	2	3	3	3	2	3	3	3	3	2	2	2	3	2	2	2	2	2	1	2	2	2	2	2	2	2	2	1	2	2	1	2	2
RW	chr3	62232594	62233594	2	3	3	3	3	3	3	3	2	2	3	2	3	2	6	6	3	5	4	4	4	4	3	3	3	3	3	3	3	2	2	2	3	2	3	2	2	3	3	3	3	2	3	2	2	3
RW	chr3	62233594	62234644	2	2	2	2	2	2	2	2	2	2	2	2	2	2	5	4	2	3	3	3	3	3	2	2	2	2	2	2	2	2	3	2	2	2	2	2	2	2	2	2	2	2	2	2	2	2
RW	chr3	62235644	62236644	2	2	2	3	2	3	2	2	2	2	1	2	2	3	6	5	3	3	4	4	4	4	3	3	3	3	3	2	3	3	2	3	3	2	3	2	1	2	3	3	2	2	2	3	2	2
RW	chr3	62237644	62238644	2	2	2	2	2	2	2	2	2	3	3	2	3	2	5	5	3	4	4	4	3	3	2	3	2	3	2	2	3	3	3	2	3	2	2	3	3	2	3	3	2	2	2	2	3	2
RW	chr3	62237644	62238644	2	2	2	2	2	2	2	2	2	3	3	2	3	2	5	5	3	4	4	4	3	3	2	3	2	3	2	2	3	3	3	2	3	2	2	3	3	2	3	3	2	2	2	2	3	2
RW	chr3	62238644	62239644	2	2	2	2	2	2	2	2	1	2	2	2	2	2	5	4	3	3	3	3	4	3	2	3	2	2	3	2	2	3	3	2	2	2	2	3	2	2	2	2	2	2	2	2	2	2
RW	chr3	62238644	62239644	2	2	2	2	2	2	2	2	1	2	2	2	2	2	5	4	3	3	3	3	4	3	2	3	2	2	3	2	2	3	3	2	2	2	2	3	2	2	2	2	2	2	2	2	2	2
RW	chr3	62240644	62241644	1	2	1	2	2	2	3	2	2	2	2	1	2	2	5	5	2	4	3	3	4	3	2	2	2	2	1	2	2	2	2	2	2	2	2	2	2	2	2	2	2	2	2	1	2	2
RW	chr3	62240644	62241644	1	2	1	2	2	2	3	2	2	2	2	1	2	2	5	5	2	4	3	3	4	3	2	2	2	2	1	2	2	2	2	2	2	2	2	2	2	2	2	2	2	2	2	1	2	2
RW	chr3	104590989	104591989	2	3	2	2	2	3	2	2	2	2	3	2	2	2	3	3	3	3	3	3	3	3	3	2	2	2	3	3	2	2	2	3	2	2	2	3	2	3	2	2	3	2	2	3	2	2
RW	chr5	8874663	8875663	1	2	2	2	2	2	2	2	2	2	2	2	2	2	3	3	3	3	3	3	2	3	3	2	3	2	2	2	2	2	2	2	2	2	3	2	2	2	2	2	2	2	2	2	3	2
RW	chr5	22764880	22765880	2	1	2	2	2	2	2	2	1	2	2	2	2	2	2	3	3	3	3	3	2	3	2	2	2	2	2	3	2	2	2	2	2	2	2	2	2	2	2	1	2	2	2	2	2	2
RW	chr5	23201152	23202152	3	2	2	2	2	2	3	2	2	2	2	3	2	2	3	3	3	2	5	3	4	4	2	2	2	2	3	2	2	3	2	2	2	2	3	2	2	2	2	2	2	2	2	2	2	2
RW	chr5	32721500	32722607	3	2	2	2	2	2	2	2	2	2	2	2	2	2	1	2	1	1	2	2	1	1	2	2	2	2	2	2	2	2	2	2	2	2	2	2	2	2	2	2	2	2	3	3	2	2
RW	chr6	936360	937360	2	2	2	2	2	2	2	2	2	2	2	2	2	2	1	1	1	2	1	1	2	2	2	2	2	2	3	2	2	2	2	2	2	2	2	2	2	2	2	2	2	2	2	2	2	2
RW	chr6	22963571	22964610	3	3	2	2	3	2	2	2	2	2	2	2	2	2	3	3	3	3	3	3	3	3	2	2	3	2	2	2	2	2	2	3	2	2	2	2	2	3	3	2	3	2	2	2	2	2
RW	chr7	11292001	11293001	2	2	2	2	2	2	2	2	2	2	2	2	2	2	3	2	3	3	2	3	3	2	2	2	2	2	2	2	2	2	2	2	2	2	2	1	2	2	2	2	2	2	1	1	2	2
RW	chr8	3497661	3499165	1	1	1	1	2	1	1	1	1	1	1	1	1	1	2	2	2	2	2	2	2	2	1	2	1	2	2	1	1	1	1	1	1	2	1	1	1	1	2	1	1	1	1	1	1	1
RW	chr9	9961905	9962940	2	2	2	2	3	2	2	2	2	3	2	2	2	2	3	3	3	3	3	3	3	3	3	2	2	2	2	2	3	2	3	3	2	2	2	2	2	2	3	2	2	2	2	2	2	2
[truncated: 35 more columns]

## Sheet: S9 Table
Chromosome	CNV_beg	CNV_end	RJF_average_CN	LXD_average_CN	RW_average_CN	SILK_average_CN	WL_average_CN	vst_RJFvsothers	RJF_average_expression_level	LXG_average_expression_level	RW_average_expression_level	SILK_average_expression_level	WL_average_expression_level	Pearson Correlation Coefficient	P-value	Breed_specific_expression	Gene	Gene Symbol	Description
chr1	59331909	59333085	17.75	8.375	10.875	7.88889	14	0.291712	765.394	557.6	407.522	390.237	386.125	0.608888	0.275742	RJF_vsothers	ENSGALG00000012934	BICD1	bicaudal D homolog 1 (Drosophila) [Source:HGNC Symbol;Acc:HGNC:1049]
chr1	94519124	94520738	3	2	2.125	2	2	0.401868	156.472	243.988	257.228	404.876	286.14	-0.733084	0.158743	RJF_vsothers	ENSGALG00000015506	GBE1	glucan (1,4-alpha-), branching enzyme 1 [Source:HGNC Symbol;Acc:HGNC:4180]
chr1	195098004	195100177	2	1.125	1.5	1.44444	1	0.248773	2737.08	1951.23	1104.67	1632.38	1261.72	0.65654	0.22877	RJF_vsothers	ENSGALG00000017304	PGM2L1	phosphoglucomutase 2-like 1 [Source:HGNC Symbol;Acc:HGNC:20898]
chr11	616130	617130	1.25	2	2	1.88889	1.83333	0.226389	313.287	144.378	187.172	170.422	233.318	-0.930616	0.0217095	RJF_vsothers	ENSGALG00000001220	HERPUD1	homocysteine-inducible, endoplasmic reticulum stress-inducible, ubiquitin-like domain member 1 [Source:HGNC Symbol;Acc:HGNC:13744]
chr11	18005648	18006687	1.75	2	2	2	2	0.235	161.101	85.2677	87.8424	67.5675	114.128	-0.889578	0.0433101	RJF_vsothers	ENSGALG00000006234	CBFA2T3	Gallus gallus core-binding factor, runt domain, alpha subunit 2; translocated to, 3 (CBFA2T3), mRNA. [Source:RefSeq mRNA;Acc:NM_001030580]
chr11	18108185	18109392	2.5	2	2.125	2.11111	2	0.209258	3974.25	5714.77	7014.9	6201.77	6903.56	-0.823815	0.0863897	RJF_vsothers	ENSGALG00000006222	ANKRD11	ankyrin repeat domain 11 [Source:HGNC Symbol;Acc:HGNC:21316]
chr12	25448	26525	5	3.75	2.75	3.33333	3.16667	0.255728	13.0433	1.34947	0.474974	0.562724	0.335568	0.930781	0.0216326	RJF_vsothers	ENSGALG00000002590		Uncharacterized protein [Source:UniProtKB/TrEMBL;Acc:E1BUB3]
chr12	54274	55274	6.75	4.75	4.125	5	5.16667	0.307133	13.0433	1.34947	0.474974	0.562724	0.335568	0.90933	0.0323247	RJF_vsothers	ENSGALG00000002590		Uncharacterized protein [Source:UniProtKB/TrEMBL;Acc:E1BUB3]
chr12	61329	62329	7.25	5.5	4.625	4.88889	5.83333	0.22428	13.0433	1.34947	0.474974	0.562724	0.335568	0.888951	0.0436754	RJF_vsothers	ENSGALG00000002590		Uncharacterized protein [Source:UniProtKB/TrEMBL;Acc:E1BUB3]
chr12	64403	65791	5	3.125	2.625	3	3.16667	0.371309	13.0433	1.34947	0.474974	0.562724	0.335568	0.975762	0.00451331	RJF_vsothers	ENSGALG00000002590		Uncharacterized protein [Source:UniProtKB/TrEMBL;Acc:E1BUB3]
chr12	71237	72312	3.75	2.625	2.125	2.44444	2.5	0.26174	13.0433	1.34947	0.474974	0.562724	0.335568	0.964653	0.00793484	RJF_vsothers	ENSGALG00000002590		Uncharacterized protein [Source:UniProtKB/TrEMBL;Acc:E1BUB3]
chr12	3186852	3188008	1.25	2	1.875	1.88889	2	0.409089	453.026	281.509	258.159	225.402	211.274	-0.93959	0.0176612	RJF_vsothers	ENSGALG00000013370	SEMA3F	Gallus gallus sema domain, immunoglobulin domain (Ig), short basic domain, secreted, (semaphorin) 3F (SEMA3F), mRNA. [Source:RefSeq mRNA;Acc:NM_204258]
chr14	13734925	13736214	1.25	2	1.75	1.77778	2	0.269843	454.272	304.921	243.251	239.974	300.052	-0.729386	0.161955	RJF_vsothers	ENSGALG00000009341		Uncharacterized protein [Source:UniProtKB/TrEMBL;Acc:F1P2P0]
chr16	366583	367583	7.5	3.875	3.5	3.22222	4	0.279843	318.338	39.7339	82.8482	68.9295	42.9132	0.951165	0.0128594	RJF_vsothers	ENSGALG00000024348		Uncharacterized protein [Source:UniProtKB/TrEMBL;Acc:F1NFX9]
chr16	382916	384035	15.25	6.5	5.25	5.55556	5.83333	0.388661	147.311	62.2202	48.8392	31.7337	11.4192	0.938884	0.0179698	RJF_vsothers	ENSGALG00000004772		Uncharacterized protein [Source:UniProtKB/TrEMBL;Acc:E1BZZ5]
chr16	387391	392557	13	6.375	7.125	6.88889	8.33333	0.21712	181.025	31.4761	52.971	44.9927	69.196	0.99779	0.000124636	RJF_vsothers	ENSGALG00000027955		Uncharacterized protein [Source:UniProtKB/TrEMBL;Acc:F1NKE5]
chr16	405655	406733	12.25	5.125	4.875	5	5.5	0.225875	176.949	36.6983	140.504	48.4076	43.989	0.724211	0.16648	RJF_vsothers	ENSGALG00000026466		Uncharacterized protein [Source:UniProtKB/TrEMBL;Acc:H9L3V2]
chr18	4657776	4658776	1.25	1.875	2.125	2	2	0.370315	247.418	135.569	133.315	128.576	123.084	-0.966835	0.00721416	RJF_vsothers	ENSGALG00000002278	UNK	unkempt family zinc finger [Source:HGNC Symbol;Acc:HGNC:29369]
chr19	4438459	4439459	3	2	2.5	2.44444	1.83333	0.251237	7452.65	5205.7	5124.26	4357.81	5063.46	0.665332	0.220369	RJF_vsothers	ENSGALG00000002140	AP2B1	adaptor-related protein complex 2, beta 1 subunit [Source:HGNC Symbol;Acc:HGNC:563]
chr20	10941083	10942139	3	2	2.25	2.33333	2.16667	0.251237	5336.22	3085.92	2342.87	2151.14	2019.31	0.827486	0.0837527	RJF_vsothers	ENSGALG00000006930	SLC12A5	solute carrier family 12 (potassium/chloride transporter), member 5 [Source:HGNC Symbol;Acc:HGNC:13818]
chr23	1410067	1411354	1.25	2	2	1.88889	2	0.409089	1530.04	2585.05	2893.33	2909.43	2501.82	0.90811	0.032973	RJF_vsothers	ENSGALG00000000723	STX12	syntaxin 12 [Source:HGNC Symbol;Acc:HGNC:11430]
chr25	1531542	1532542	1.5	2	2	1.88889	2	0.209258	844.122	534.127	481.471	444.661	515.93	-0.913013	0.0303923	RJF_vsothers	ENSGALG00000014656	RPRD2	Gallus gallus regulation of nuclear pre-mRNA domain containing 2 (RPRD2), mRNA. [Source:RefSeq mRNA;Acc:NM_001012932]
chr25	1989060	1990204	1	1.875	1.75	1.77778	1.66667	0.224924	358.528	230.913	270.592	170.294	233.289	-0.851202	0.0673426	RJF_vsothers	ENSGALG00000029036	ZNF687	zinc finger protein 687 [Source:HGNC Symbol;Acc:HGNC:29277]
chr25	1993406	1994406	1.75	2	2	2	2	0.235	358.528	230.913	270.592	170.294	233.289	-0.854557	0.0651123	RJF_vsothers	ENSGALG00000029036	ZNF687	zinc finger protein 687 [Source:HGNC Symbol;Acc:HGNC:29277]
chr25	1995406	1996406	1.25	2	2	1.88889	2	0.327837	358.528	230.913	270.592	170.294	233.289	-0.776433	0.122551	RJF_vsothers	ENSGALG00000029036	ZNF687	zinc finger protein 687 [Source:HGNC Symbol;Acc:HGNC:29277]
chr26	4223302	4224590	1.5	2	2.125	1.88889	2	0.235	658.75	347.321	367.519	343.835	315.221	-0.907735	0.0331733	RJF_vsothers	ENSGALG00000002762	UHRF1BP1	UHRF1 binding protein 1 [Source:HGNC Symbol;Acc:HGNC:21216]
chr26	4916362	4917362	2.5	2	2	2	2	0.299202	142.316	89.4966	81.8937	66.2933	65.2876	0.944895	0.0153991	RJF_vsothers	ENSGALG00000003375	FOXP4	forkhead box P4 [Source:HGNC Symbol;Acc:HGNC:20842]
chr27	3989756	3990826	1.25	1.625	1.875	2	2	0.226389	1225.7	637.407	956.637	671.686	664.118	-0.732164	0.15954	RJF_vsothers	ENSGALG00000001574	MLLT6	myeloid/lymphoid or mixed-lineage leukemia (trithorax homolog, Drosophila); translocated to, 6 [Source:HGNC Symbol;Acc:HGNC:7138]
chr28	3766945	3767945	3.25	2.125	2.75	2.33333	2	0.212483	1914.23	1059.28	823.876	832.302	839.792	0.763365	0.133169	RJF_vsothers	ENSGALG00000003428		Uncharacterized protein [Source:UniProtKB/TrEMBL;Acc:E1C2C5]
chr28	4116462	4117462	2	3	3	2.88889	2.66667	0.206197	284.156	155.645	89.2028	116.827	93.1546	-0.845969	0.070868	RJF_vsothers	ENSGALG00000021601	EPS15L1	epidermal growth factor receptor pathway substrate 15-like 1 [Source:HGNC Symbol;Acc:HGNC:24634]
chr3	104522806	104524804	1.5	2	2	1.88889	2	0.209258	1328.16	614.127	533.99	502.288	566.69	-0.948993	0.0137224	RJF_vsothers	ENSGALG00000026973	KIF3C	kinesin family member 3C [Source:HGNC Symbol;Acc:HGNC:6321]
chr3	104525252	104526482	1.5	2	2	2	2	0.479592	1328.16	614.127	533.99	502.288	566.69	-0.992927	0.000713353	RJF_vsothers	ENSGALG00000026973	KIF3C	kinesin family member 3C [Source:HGNC Symbol;Acc:HGNC:6321]
chr4	89197659	89198893	1.25	2	2	1.88889	2	0.344259	1106.33	624.07	578.905	455.658	378.747	-0.913125	0.0303344	RJF_vsothers	ENSGALG00000016087	FBXO41	F-box protein 41 [Source:HGNC Symbol;Acc:HGNC:29409]
chr5	17763325	17764398	1.25	2	2	2	2	0.734375	2855.97	1977.93	1488.21	1791.12	1914.66	-0.929689	0.0221428	RJF_vsothers	ENSGALG00000013532	CAPRIN1	Gallus gallus cell cycle associated protein 1 (CAPRIN1), mRNA. [Source:RefSeq mRNA;Acc:NM_001031365]
chr5	23819291	23820358	1	1.875	2	1.88889	1.83333	0.463281	661.427	965.862	1055.07	1178.22	1119.04	0.900834	0.0369242	RJF_vsothers	ENSGALG00000008569	CHP1	Gallus gallus calcineurin-like EF hand protein 1 (CHP1), mRNA. [Source:RefSeq mRNA;Acc:NM_001007930]
